# Supplementary material for: Sex-Based Dimorphism of Anticancer Immune Response and Molecular Mechanisms of Immune Evasion
Source: Oxford University Press journal article supplement (doi:10.1158/1078-0432.ccr-21-0136), 2021-05-20
Supplement: 10780432ccr210136-sup-258831_3_supp_7061949_qrtttg.docx [file 10780432ccr210136-sup-258831_3_supp_7061949_qrtttg.docx]

**Supplementary figure 1.** Top 1% significantly enriched gene sets, in tumors of women and men


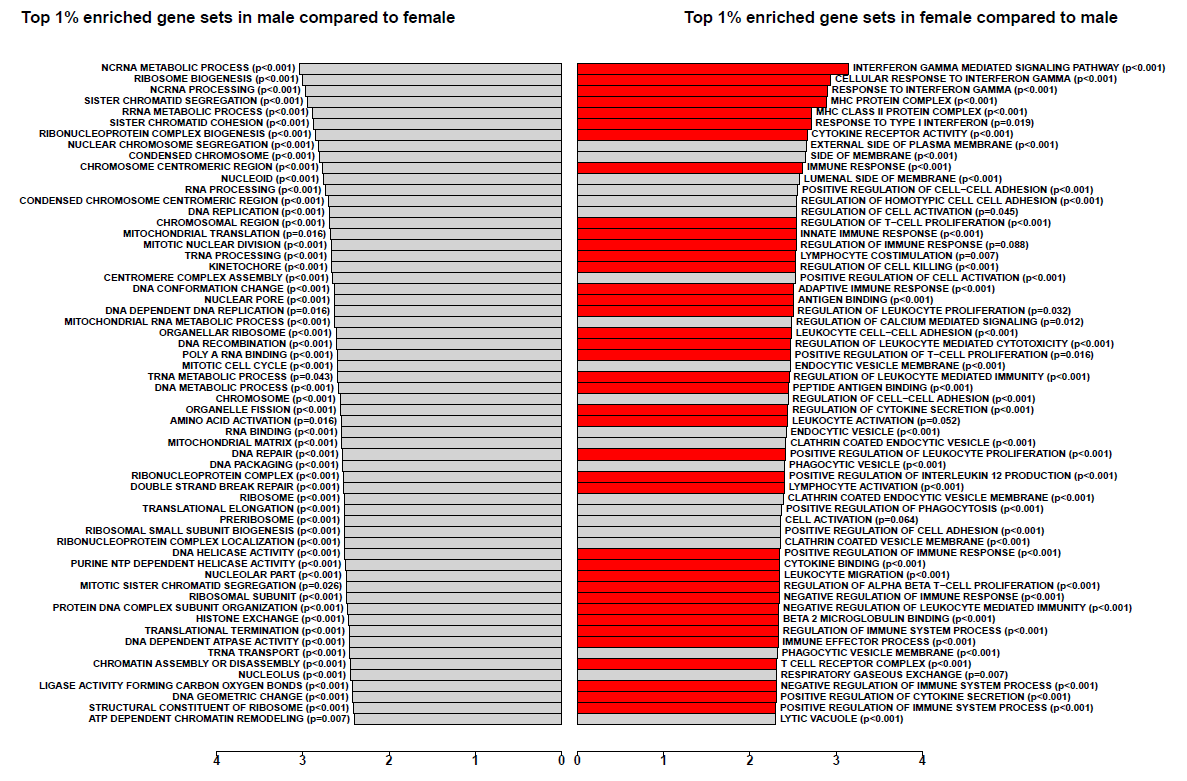


Normalized Enriched Score (NES)
