# Supplementary material for: Sex-based dimorphism of anticancer immune response and molecular mechanisms of immune evasion
Source: Clin Cancer Res. Author manuscript; Available in PMC 2021 Aug 4. (PMC7611463; doi:10.1158/1078-0432.CCR-21-0136)
Supplement: supplementary table 1 [file EMS127617-supplement-supplementary_table_1.xlsx]

## Sheet: 64 cell types signatures.txt
Celltype_Source_ID	# of genes
aDC_HPCA_1	8	C1QA	C1QB	CD80	IL12B	CCL13	CCL17	CCL19	CCL22
aDC_HPCA_2	10	C1QA	C1QB	CD80	FPR3	HLA-DQA1	IL12B	CCL13	CCL17	CCL19	CCL22
aDC_HPCA_3	10	C1QA	C1QB	CD80	FPR3	HLA-DQA1	IL12B	CCL13	CCL17	CCL19	CCL22
aDC_IRIS_1	19	CD80	IL3RA	IL12B	CXCL9	PTGIR	CCL8	CCL13	CCL17	CCL19	CCL23	SLAMF1	SIGLEC1	TRAF1	TNFRSF4	TXN	SOCS3	HS3ST3B1	CD209	LILRA5
aDC_IRIS_2	173	ACHE	ADPRH	ALOX15B	ANXA5	XIAP	ARF3	RHOG	ATP1B3	BLVRA	C1QA	C1QB	C3AR1	CASP5	CD80	CD86	CCR5	CMKLR1	EIF5	ENO1	ETV3	FCER1G	FCER2	FPR3	GMFB	GNG5	GRB2	RAPGEF1	HCK	HLA-DQA1	HRH2	DNAJA1	IL2RA	IL3RA	IL9	IL10	IL10RA	IL12B	IMPDH1	IRF4	KCNMB1	LAIR1	LOR	RAB8A	CXCL9	MTF1	NFE2L2	NFKB1	NFKBIB
aDC_IRIS_3	98	ACHE	ALOX15B	RHOG	ATP1B3	BLVRA	C1QB	CD80	CD86	EIF5	ENO1	ETV3	GNG5	RAPGEF1	HCK	IL2RA	IL3RA	IL9	IL10	IL10RA	IL12B	IRF4	RAB8A	CXCL9	MTF1	NFE2L2	NFKB1	P2RX7	PGK1	MAP2K1	PTGIR	RELA	CLIP1	CCL7	CCL8	CCL17	CCL19	CCL23	SLAMF1	SLC1A2	SLC6A12	SIGLEC1	SRC	STAT2	TRAF1	TNFRSF4	TXN	ZBTB17	ELL
Adipocytes_ENCODE_1	12	ADH1B	DLAT	GPD1	LBP	PLIN1	PPP1R1A	PPP2R1B	PTGER3	CILP	ADIPOQ	COL5A3	PNPLA2
Adipocytes_ENCODE_2	14	ADH1B	ATP5G3	DLAT	GPD1	HADHA	LBP	PLIN1	PPP1R1A	PPP2R1B	PTGER3	CILP	ADIPOQ	COL5A3	PNPLA2
Adipocytes_ENCODE_3	13	ADH1B	ATP5G3	DBI	DLAT	GPD1	LBP	PLIN1	PPP2R1B	PTGER3	CILP	ADIPOQ	COL5A3	PNPLA2
Adipocytes_FANTOM_1	8	ADH1B	ATP1A2	GPD1	HP	LBP	PLIN1	TF	ADIPOQ
Adipocytes_FANTOM_2	8	ADH1B	ATP1A2	GPD1	HP	LBP	PLIN1	TF	ADIPOQ
Adipocytes_FANTOM_3	9	ADH1B	ATP1A2	C6	GPD1	HP	LBP	PLIN1	TF	ADIPOQ
Adipocytes_HPCA_1	14	ADH1B	ATP5G3	DLAT	GPD1	HADHA	LBP	PLIN1	PPP1R1A	PPP2R1B	PTGER3	CILP	ADIPOQ	COL5A3	PNPLA2
Adipocytes_HPCA_2	12	ADH1B	DLAT	GPD1	LBP	PLIN1	PPP1R1A	PPP2R1B	PTGER3	CILP	ADIPOQ	COL5A3	PNPLA2
Adipocytes_HPCA_3	16	ADH1B	SLC25A6	ATP5G3	DBI	DLAT	GPD1	LBP	PLIN1	PPP1R1A	PPP2R1B	PTGER3	CILP	ADIPOQ	COL5A3	ECHDC1	PNPLA2
Astrocytes_ENCODE_1	47	CNN1	COL11A1	DNA2	FABP7	GPC4	CENPI	FZD2	GLI2	GNG3	GPX7	TNC	LOXL1	LRP4	NNAT	POU3F3	PTN	PTX3	RBP1	SDC2	TFAP2C	TRO	XRCC2	ADAM12	DPF3	ST8SIA2	ZNF239	DCHS1	KIF20B	REC8	PNMA2	CAND2	FBXL7	SYT11	DAPK2	ANKRD1	NT5DC3	PNMAL1	ASAP3	DOK5	GABRQ	AGPAT4	NCAPG	FSD1	KIF18A	MXD3	PSRC1	OLFML2A
Astrocytes_ENCODE_2	51	CBR3	CLCN2	CNN1	COL11A1	FABP7	GPC4	FZD2	GRM7	HIST1H1D	TNC	KIFC1	LOXL1	MCM3	POU3F3	PTN	SCN5A	SDC2	STAC	TFAP2C	TRO	XRCC2	ADAM12	DPF3	ST8SIA2	ZNF239	DCHS1	RECQL4	REC8	TRIOBP	CAND2	FBXL7	DAPK2	RIBC2	FAM64A	PNMAL1	ASAP3	DOK5	GABRQ	AGPAT4	NT5DC2	TMEM135	FSD1	ACSS3	ATF7IP2	TRIM45	MXD3	GINS4	PSRC1
Astrocytes_ENCODE_3	20	CNN1	COL11A1	FABP7	FZD2	GNG3	TNC	LRP4	POU3F3	PTN	ADAM12	DPF3	DAPK2	ANKRD1	PNMAL1	ASAP3	DOK5	GABRQ	AGPAT4	PSRC1	OLFML2A
Astrocytes_FANTOM_1	159	ACTA2	ACTG2	APLP1	BGN	BST1	C1S	SERPINH1	CDH6	CDH11	CHN1	CLU	CNN1	COL1A1	COL1A2	COL3A1	COL5A1	COL5A2	COL6A1	COL6A2	COL6A3	COL8A2	COL13A1	CRABP2	VCAN	DCN	DIO2	DPYSL3	DUSP2	FAP	FBLN2	FBN1	FGFR1	FGG	FLNC	FN1	FZD2	GATA6	GBP2	GEM	GNG11	CFH	HOXB2	CFI	IGFBP2	IGFBP3	IGFBP5	IGFBP6	ITGA7
Astrocytes_FANTOM_2	86	ACTA2	ACTG2	BGN	CNN1	COL1A1	COL1A2	COL3A1	COL5A1	COL6A1	COL6A2	COL8A2	VCAN	DIO2	DPYSL3	FBLN2	FGG	FLNC	FN1	CFH	HOXB2	CFI	IGFBP2	IGFBP3	IGFBP5	LAMA4	LOXL1	LUM	MEST	MFAP4	MGP	MYLK	OXTR	PCOLCE	PDGFRA	PDGFRB	PLN	PPP1R3C	PTGIS	PTN	PTPRN	RARRES1	RARRES2	RGS4	CCL2	CXCL12	SFRP4	SLC14A1	SPARC
Astrocytes_FANTOM_3	121	ACTA2	ACTG2	APLP1	BGN	C1S	CDH11	CLU	CNN1	COL1A1	COL1A2	COL3A1	COL5A1	COL5A2	COL6A1	COL6A2	COL6A3	COL8A2	COL13A1	VCAN	DCN	DIO2	DPYSL3	DUSP2	FAP	FBLN2	FBN1	FGG	FLNC	FN1	CFH	HOXB2	CFI	IGFBP2	IGFBP3	IGFBP5	IGFBP6	LAMA4	LOX	LOXL1	LUM	MAP1A	MDK	MEST	MFAP4	MGP	MYLK	NAP1L3	CLDN11
B-cells_FANTOM_1	16	BLK	CD19	MS4A1	CD22	CD37	CD79A	PNOC	SNX2	MBD4	STAG3	PWP1	SP140	GGA2	STAP1	FCRL2	SMC6
B-cells_FANTOM_2	12	BLK	CD19	CD22	CD37	CD79A	PNOC	MBD4	STAG3	SP140	GGA2	FCRL2	SMC6
B-cells_FANTOM_3	21	BLK	BTK	CD19	MS4A1	CD22	CD37	CD79A	CSNK1G3	PHKB	PNOC	SNX2	TRAF3	MBD4	DEPDC5	STAG3	PWP1	SP140	GGA2	STAP1	FCRL2	SMC6
B-cells_HPCA_1	44	BLK	BTK	CD19	MS4A1	CD22	CD37	CD79A	CSNK1G3	CD180	PHKB	PNOC	POU2F1	PRKCB	SNX2	TRAF3	UBE2G1	PRDM2	MBD4	SLC24A1	DEPDC5	BCL2L11	STAG3	PRDM4	PWP1	SP140	RRAS2	GGA2	SIPA1L3	STAP1	P2RY10	CDC40	MIOS	AFTPH	DEF8	ARHGAP17	MFN1	WDR11	FCRL2	SMC6	C12orf49	PIKFYVE	JMJD1C	MCM9	EGOT
B-cells_HPCA_2	10	CD19	MS4A1	CD22	CD37	CD79A	SNX2	PRDM4	GGA2	FCRL2	SMC6
B-cells_HPCA_3	8	BLK	CD19	HLA-DOA	SPIB	TNFRSF13B	STAP1	VPREB3	FCRL2
B-cells_NOVERSHTERN_1	65	ACTN2	TNFRSF17	BLK	CXCR5	CD19	MS4A1	CD22	CD37	CD53	CD72	CD79A	CD79B	CNR1	CNR2	DAXX	DNASE1	AFF2	GDI2	GPR18	HLA-DOA	HTR3A	IFNW1	IL17A	INPP5B	KCNN3	CD180	MGAT5	PAX5	PGR	PNOC	POU2F2	SPIB	SYPL1	TERT	SEC62	SLC30A4	TCL1A	RNGTT	MBD4	S1PR2	RECQL5	LY86	MYOT	TCL1B	STAG3	LSM6	SP140	IKZF3
B-cells_NOVERSHTERN_2	76	TNFRSF17	BLK	CXCR5	BMP8B	CD19	MS4A1	CD37	CD53	CD72	CD79A	CD79B	CHAD	CCR6	COL19A1	CR1	CSNK1G3	GPR25	HLA-DOA	HLA-DPB1	HSPA4	HTR3A	LY9	CD180	MGAT5	CIITA	MAP3K9	MMP17	PAX5	RPS11	RPS16	SNX2	SPIB	TROVE2	ZNF37A	ZNF154	ZNF202	ZNF208	TCL1A	AP3B1	S1PR4	BAIAP3	LY86	TCL1B	KIAA0430	DEPDC5	CEPT1	SP140	IKZF3
B-cells_NOVERSHTERN_3	55	ACTN2	TNFRSF17	BLK	CXCR5	CD19	MS4A1	CD22	CD37	CD53	CD72	CD79A	CD79B	CNR1	AFF2	GDI2	GPR18	HLA-DOA	HTR3A	IFNA2	IFNW1	IL17A	INPP5B	KCNN3	PAX5	PNOC	POU2F2	SPIB	SYPL1	TERT	SLC30A4	TCL1A	RNGTT	MBD4	SLC13A2	S1PR2	RECQL5	LY86	MYOT	TCL1B	STAG3	LSM6	SP140	IKZF3	CNOT1	STAP1	TCL6	VPREB3	ITSN2
Basophils_FANTOM_1	45	ALAS2	ARR3	ART3	C8A	CD72	DEFA5	EFNA2	GPR3	ONECUT1	HP	CXCR2	KCNA5	KCNJ13	LECT2	LEP	SMCP	MPO	MYH1	NPY5R	OMG	PRKACG	PRL	TGM3	TCL1A	AKAP4	C6orf10	FRS3	LAMB4	CLCA4	AHCTF1	BMP10	AMOTL2	ARHGAP17	TEX12	C11orf16	OTUD7B	SLC17A6	CASS4	LRTM1	HPSE2	FBRS	CXorf36	SLCO5A1	ATXN3L	GATC
Basophils_FANTOM_2	197	ACTN2	ADCY2	ADH1A	ADPRH	ADRA1A	AGTR2	ALDOB	APOF	ARR3	ART1	ART3	BRDT	C8A	C9	CETP	CEACAM7	COL19A1	CPA1	CRHR2	CTRL	CYP2A7	CYP17A1	CYP19A1	CYP21A2	DAZL	DCT	DSP	EFNA2	EPHA3	F9	F13B	FCN2	GABRA1	GABRG3	GNG3	GPR3	GRB2	GRIK4	GRIN2A	GRM4	GRM7	GUCA1B	ONECUT1	HP	HTN3	HTR1D	HTR1E	HTR6
Basophils_FANTOM_3	8	SCGB2A2	NPY5R	SSX5	NR2E3	SSX3	PCDHA2	C11orf16	TMEM212
Basophils_NOVERSHTERN_1	42	CLK1	DEFA4	GPR183	ERN1	FCN1	FGR	GRK6	GTF3C1	GZMH	GZMB	HRH2	KLRD1	LAIR2	MMP8	NKG7	PF4V1	PI4KB	PLCB2	RFX2	RGS1	RNASE2	S100A12	XCL1	VIM	VAPA	CD101	GSTO1	BCL2L11	NMUR1	GNLY	LILRA1	LILRA2	JMJD6	PADI4	TBK1	WRAP53	RETN	CYSLTR2	DENND1A	NAA16	TUBB1	POLDIP3
Basophils_NOVERSHTERN_2	11	CEACAM8	FCN1	PI4KB	NCR1	BCL2L11	NMUR1	NXT1	DERL2	WRAP53	DENND1A	POLDIP3
Basophils_NOVERSHTERN_3	8	FCN1	NCR1	BCL2L11	NMUR1	NXT1	WRAP53	DENND1A	POLDIP3
CD4+ memory T-cells_FANTOM_1	200	AAMP	ACTL6A	ADSL	AKT2	ANXA7	ARL2	ATF1	BTF3	CCNC	CD2	CD5	CD6	CD28	CDK9	CETN3	CCR4	COX7C	CSNK1A1	CSNK2A2	CTBP1	CTLA4	DAD1	DDX3X	DR1	GPR183	EIF4G2	ERH	ESD	FNTA	GABPA	GLUD1	HDAC1	HINT1	HMOX2	HNRNPH3	HNRNPU	DNAJB1	EIF3E	ITK	JAK3	KIF22	KTN1	LDHB	SH2D1A	SMAD2	MAGOH	NCL	NDUFS5
CD4+ memory T-cells_FANTOM_2	11	CD6	CD28	GPR183	EIF3E	ITK	PKP4	PREPL	DNAJA2	PTGES3	CD2AP	ICOS
CD4+ memory T-cells_FANTOM_3	139	ADSL	SLC25A6	ANXA7	ATF1	BTF3	CD5	CD6	CD28	CCR4	COX7C	CSNK2A2	CTBP1	DAD1	DDX3X	DR1	GPR183	EEF2	EIF4G2	ESD	FNTA	GLUD1	HDAC1	HINT1	HNRNPH3	DNAJB1	EIF3E	ITK	KARS	KIF22	KTN1	LDHB	SH2D1A	SMAD2	NDUFS5	PFN1	PLP2	PPP1CB	PPP1CC	PPP2R5D	PPP6C	RAD21	RBM3	RNF6	RPL5	RPL8	RPS3	RPS6	RPS19
CD4+ memory T-cells_IRIS_1	13	CD3G	CD28	CD40LG	CCR4	CTLA4	GPR15	LIMS1	RBL2	DLEC1	CXCR6	PDCD10	TRAT1	ARHGAP15
CD4+ memory T-cells_IRIS_2	15	CD28	CD40LG	CCR4	CTLA4	GPR15	GZMA	GZMK	HMGB2	PDCD1	RBL2	CD226	GPR171	TRAT1	UBASH3A	ARHGAP15
CD4+ memory T-cells_IRIS_3	21	ADSL	CD28	CD40LG	CCR4	CTLA4	GZMA	GZMK	HMGB2	LIMS1	MEN1	PTPN4	ZNF236	DLEC1	CD96	HMGN4	SEC23IP	ICOS	TRAT1	AURKAIP1	ARHGAP15	RNF34
CD4+ naive T-cells_FANTOM_1	15	CD3E	CD6	CD7	CCR7	DSC1	JAK3	PLCL1	PLCG1	ZAP70	CABIN1	PLXDC1	GPSM3	ANKRD55	LIMD2	CHMP7
CD4+ naive T-cells_FANTOM_2	56	APBB1	CD3E	CD6	CD7	CD27	TNFSF8	CCR7	DSC1	GRK6	GZMM	PRMT2	IDUA	INSL3	ITK	JAK3	NUMA1	PHF1	PLCL1	PLCG1	RXRB	SELPLG	ZAP70	ZNF76	CUBN	PIP4K2B	NCK2	CDK10	TNK1	ACAP1	TSPAN32	ARFRP1	2017-09-09	MSL3	WDR6	MLXIP	LEPROTL1	CABIN1	SH2B1	IPCEF1	KLHL3	SIT1	TRAT1	CRLF3	RAPGEF6	FAM193B	SIRPG	PACS1	PLXDC1
CD4+ naive T-cells_FANTOM_3	9	CD27	CLC	CTSW	DNAJB1	RBL2	HAUS3	ANKRD55	ZNF394	CHMP7
CD4+ naive T-cells_HPCA_1	35	CD6	CCR7	DSC1	GLG1	LY9	MAK	PLCL1	RBL2	RBMS1	ATXN7	CUL1	MTRF1	BMS1	CEPT1	AAK1	SORCS3	CLUAP1	IPCEF1	ICOS	COQ6	PHF20L1	POP5	RAPGEF6	NUDT9	UBASH3A	GIN1	SETD5	KDM3A	PLXDC1	NAA16	ANKRD55	TRAF3IP3	NDFIP1	CHMP7	TMEM30B
CD4+ naive T-cells_HPCA_2	20	CCR7	FKTN	IL16	KRT2	NPAT	RBMS1	VPS52	MTRF1	CEPT1	SORCS3	UTP20	PHF20L1	POP5	RAPGEF6	RNF216	TUG1	PLXDC1	ANKRD55	TRAF3IP3	CHMP7
CD4+ naive T-cells_HPCA_3	24	CD6	CCR7	FKTN	IL16	KRT2	NPAT	PLCL1	RBMS1	VPS52	MTRF1	CEPT1	AAK1	SORCS3	UTP20	PHF20L1	POP5	RAPGEF6	GIN1	TUG1	PLXDC1	NOL9	ANKRD55	TRAF3IP3	CHMP7
CD4+ naive T-cells_IRIS_1	17	CD3G	CD4	CD5	CD7	HMOX2	NPAT	RPA3	RPLP2	RPL14	SNPH	TBC1D5	RAB3GAP1	MLH3	SIRPG	PARP11	MKL1	GIMAP6
CD4+ naive T-cells_IRIS_2	12	CD4	CD5	CD7	CD40LG	INPP4A	NPAT	TRAF1	TBC1D5	SIRPG	PARP11	MKL1	GIMAP6
CD4+ naive T-cells_IRIS_3	47	CD2	CD3G	CD247	CD4	CD5	CD7	CD27	CD40LG	CCR7	HMOX2	PRMT2	INPP4A	NPAT	RPA3	RPL38	RPLP2	RPS6	TRAF1	RPL14	ZNF264	SNPH	TBC1D5	ZBTB40	PRMT3	USP16	NUP50	RAB3GAP1	ZNF609	RPRD2	LEPROTL1	MLH3	TRAT1	FCF1	SIRPG	PARP11	PLXDC1	MKL1	COPS7B	DDX31	KRI1	DDX50	ACBD4	SLTM	RPAP2	WDR82	ZNF780B	GIMAP6
CD4+ naive T-cells_NOVERSHTERN_1	39	CASP8	CD3E	CD4	CD27	CD28	CD40LG	CDK1	CCR7	CTLA4	HMOX2	LAIR2	PLCL1	RBL2	SUPV3L1	TPP2	GRAP2	SNPH	ZBTB40	ZNF263	USP16	CD226	CA5B	ZNF609	FNBP4	NUDCD3	LEPROTL1	STAP1	SIT1	ICOS	TRAT1	PHF20L1	TEX264	SIRPG	POLR3E	PLXDC1	MKL1	DPEP2	COPS7B	GIMAP6
CD4+ naive T-cells_NOVERSHTERN_2	9	APBB1	PRMT2	TATDN2	DIDO1	REV1	RNF216	PLXDC1	NDFIP1	CHMP7
CD4+ naive T-cells_NOVERSHTERN_3	15	CD3E	CD6	CD7	CCR7	DSC1	JAK3	PLCL1	PLCG1	ZAP70	CABIN1	PLXDC1	GPSM3	ANKRD55	LIMD2	CHMP7
CD4+ T-cells_BLUEPRINT_1	34	BAD	CD2	CD3G	CD5	CD28	CD40LG	CCR4	CCR7	CTLA4	GOLGA4	HMOX2	MGAT2	NFE2L2	PLCL1	PPP2CA	SON	SUPV3L1	TRAF1	TSPYL1	FBXO21	FNBP4	NUDCD3	LEPROTL1	ICOS	TRAT1	FOXP3	SIRPG	POLR3E	USP36	DDX31	RIC3	SLTM	HIPK1	ATXN7L1
CD4+ T-cells_BLUEPRINT_2	67	BAD	CD2	CD3E	CD3G	CD5	CD6	CD28	CD40LG	CCR4	CCR7	CTLA4	DNAH6	GOLGA4	HMOX2	HNRNPU	DNAJB1	MBNL1	MGAT2	NFE2L2	PLCL1	PPP2CA	SFPQ	SON	SUPV3L1	TPP2	TRAF1	TSPYL1	UBP1	ZAP70	OFD1	HERC1	RBM19	DLEC1	CCR9	FBXO21	ZCCHC11	FNBP4	NUDCD3	PHF3	LEPROTL1	LSM14A	TOR1AIP1	ICOS	IL21R	TRAT1	FOXP3	WBP11	USP47
CD4+ T-cells_BLUEPRINT_3	29	BAD	CD2	CD3G	CD5	CD28	CD40LG	CCR4	CTLA4	GOLGA4	HMOX2	MGAT2	NFE2L2	PLCL1	PPP2CA	SUPV3L1	TSPYL1	NUDCD3	LEPROTL1	ICOS	TRAT1	FOXP3	WBP11	SIRPG	POLR3E	USP36	DDX31	HAUS3	SLTM	HIPK1
CD4+ T-cells_FANTOM_1	26	APBB1	CD5	CD6	CD28	CD40LG	CCR7	CTLA4	ITK	PLCL1	PLCG1	PSD	SSTR3	TTN	CUBN	SNPH	SPEG	MSL3	FNBP4	KLHL3	ICOS	RAPGEF6	PLXDC1	NOL9	ANKRD55	OBSCN	CHMP7
CD4+ T-cells_FANTOM_2	13	APBB1	CD28	CTLA4	ITK	PLCL1	SNPH	PPWD1	PHF3	ICOS	TRAT1	RAPGEF6	NOL9	CHMP7
CD4+ T-cells_FANTOM_3	77	KRIT1	CCNT2	CD2	CD4	CD28	TNFSF8	CCR7	CCR8	DDX5	DSC1	GPR183	EZH1	FCN1	GP5	PRMT2	ITIH4	ITK	LY9	PABPC3	POU6F1	PPM1B	RBL2	RXRG	ATXN7	TPT1	NR2C1	CUBN	NCK2	CDC14A	FUBP1	UBA3	SGSM2	HMGN4	CCR9	MSL3	DIDO1	CA5B	AAK1	MORC2	SACM1L	USP33	LEPROTL1	MTO1	IPCEF1	ZBTB11	SIT1	PNMA3	UBQLN2
CD4+ T-cells_HPCA_1	37	ABCD2	BAD	CD2	CD3D	CD3E	CD3G	CD5	CD7	CD27	CD28	CD40LG	CCR4	CTLA4	GOLGA4	HMOX2	NFE2L2	PLCL1	PPP2CA	SON	SUPV3L1	TNFRSF4	ARHGEF1	TOMM20	CD96	FBXO21	NUDCD3	LEPROTL1	ICOS	GPR171	TRAT1	FOXP3	SIRPG	POLR3E	USP36	ZNF335	RIC3	HIPK1
CD4+ T-cells_HPCA_2	30	BAD	CD2	CD3D	CD3E	CD3G	CD5	CD6	CD7	CD27	CD28	CD40LG	CCR4	CTLA4	HMOX2	PLCL1	PPP2CA	SON	SUPV3L1	TSPYL1	ARHGEF1	CD96	NUDCD3	LEPROTL1	ICOS	GPR171	FOXP3	SIRPG	ARHGAP15	HAUS3	HIPK1
CD4+ T-cells_HPCA_3	35	ABCD2	BAD	CD2	CD3D	CD3E	CD3G	CD5	CD7	CD27	CD28	CD40LG	CCR4	CTLA4	GOLGA4	HMOX2	MGAT2	PLCL1	PPP2CA	SON	SUPV3L1	TRAF1	TNFRSF4	ARHGEF1	CD96	NUDCD3	LEPROTL1	ICOS	GPR171	TRAT1	FOXP3	ZNHIT6	SIRPG	HAUS3	RIC3	HIPK1
CD4+ Tcm_BLUEPRINT_1	43	ADSL	AK1	CD247	CD40LG	CSNK1D	CTLA4	DNMT1	GOLGB1	ITIH4	MAN2C1	NFRKB	PLCG1	POLR2A	PSMD2	RAD9A	SPTAN1	SUPT6H	NR2C1	TSC1	USP4	DGCR14	DHX16	RAE1	BAG3	SGSM2	HUWE1	RBM5	NXF1	SORCS3	MYO16	EDC4	MTO1	ZNF638	CNIH4	ICOS	FAM193B	FBXL8	EXOC1	KDM3A	USP36	CORO7	ANKRD55	CBLL1
CD4+ Tcm_BLUEPRINT_2	39	AK1	CD2	CD247	CD40LG	CCR7	CTLA4	DNMT1	GOLGB1	ITIH4	NFRKB	PLCG1	SPTAN1	TPR	NR2C1	TSC1	DHX16	TRADD	BAG3	SGSM2	RBM5	MSL3	AAK1	SORCS3	MYO16	EDC4	CNIH4	ICOS	FAM193B	FBXL8	EXOC1	KDM3A	ARHGAP15	YLPM1	USP36	ANKRD55	WDR59	CBLL1	TRAF3IP3	2017-09-10
CD4+ Tcm_BLUEPRINT_3	87	ADSL	AK1	CD2	CD247	CD40LG	CCR7	CSNK1D	CTLA4	DNMT1	GOLGB1	ITIH4	LY9	MAN2C1	NAP1L4	NFRKB	NPAT	PLCL1	PLCG1	POLR2A	PSMD2	RAD9A	SLAMF1	SPTAN1	SUPT6H	TPR	NR2C1	TSC1	USP4	ZNF200	DGCR14	DHX16	RAE1	TRADD	EIF2B5	USP10	ITGB1BP1	BAG3	ACAP1	SGSM2	HUWE1	RBM5	NME6	NXF1	USP39	FASTK	MSL3	DIDO1	WDR6
CD4+ Tcm_HPCA_1	56	BMPR1A	CD4	CD5	CD6	CD28	TNFSF8	CD40LG	CD48	CTLA4	DAB1	SARDH	DVL1	ERN1	GP5	GPR15	IDUA	ITK	KRT1	POU6F1	PSD	RPL38	SCNN1D	TCF20	TPO	TNFRSF4	XPC	NCK2	CDC14A	TRADD	SNPH	DLEC1	SPEG	HNRNPUL1	MORC2	NCDN	RRS1	GMEB2	ICOS	PNMA3	GLTSCR2	TRAT1	UBASH3A	FXYD7	FBXL8	KBTBD4	ARHGAP15	ZC3HAV1	SLC4A5
CD4+ Tcm_HPCA_2	77	BMPR1A	CD4	CD5	CD6	CD28	TNFSF8	CD40LG	CD48	CCR4	CRY2	CTLA4	DAB1	SARDH	DVL1	ERN1	GP5	GPR15	DNAJB1	IDUA	ITK	KRT1	LTA	POU6F1	PSD	PURA	RPL38	RPS16	RPS21	SCNN1D	STK11	TCF20	TFAP4	TPO	TNFRSF4	XPC	ZRSR2	NCK2	CDC14A	TRADD	ACAP1	SNPH	JOSD1	DLEC1	SPEG	IKZF1	2017-09-09	HNRNPUL1	MORC2
CD4+ Tcm_HPCA_3	37	CD5	CD6	CD28	TNFSF8	CD40LG	CD48	CTLA4	DAB1	ERN1	GP5	GPR15	ITK	KRT1	POU6F1	PSD	RPL38	TPO	TNFRSF4	NCK2	CDC14A	TRADD	SNPH	DLEC1	MORC2	RRS1	ICOS	GLTSCR2	TRAT1	UBASH3A	FXYD7	FBXL8	ARHGAP15	DNAI2	ANKRD55	OBSCN	TRMT61A	TMEM30B
CD4+ Tcm_NOVERSHTERN_1	22	CD40LG	CCR4	CCR8	CTLA4	DAB1	ERN1	GPR15	DNAJB1	KRT1	POU6F1	TPO	CDC14A	TRADD	DLEC1	ICOS	TRAT1	FXYD7	FBXL8	SIRPG	SLC4A5	ANKRD55	OBSCN
CD4+ Tcm_NOVERSHTERN_2	19	CCR4	CCR8	CTLA4	DAB1	ERN1	GPR15	DNAJB1	KRT1	POU6F1	TPO	TRADD	DLEC1	ICOS	TRAT1	FXYD7	FBXL8	SIRPG	ANKRD55	OBSCN
CD4+ Tcm_NOVERSHTERN_3	58	APBB1	CD5	CD6	CD28	TNFSF8	CD40LG	CD48	CCR4	CCR6	CCR7	CCR8	CTLA4	DAB1	SARDH	DVL1	ERN1	GP5	GPR15	GPR25	DNAJB1	IL2RA	ITK	KRT1	PLCG1	POU6F1	PSD	RPL38	TPO	TNFRSF4	NCK2	CDC14A	TRADD	KALRN	SOCS3	ZFYVE9	PLCH2	SNPH	DLEC1	2017-09-09	MORC2	RRS1	ICOS	PNMA3	GLTSCR2	COL5A3	TRAT1	UBASH3A	FXYD7
CD4+ Tem_BLUEPRINT_1	10	RPN2	SLAMF1	SPTAN1	TRADD	MYO16	MCF2L2	ESYT1	TRAPPC2L	ARHGAP15	RIC8A
CD4+ Tem_BLUEPRINT_2	10	TNFSF8	GPR25	SELPLG	SMARCC2	LZTR1	TRADD	CCR9	SIT1	FBXL8	RNPEPL1
CD4+ Tem_BLUEPRINT_3	22	CD2	CTLA4	DNAJB1	RGS1	CLIP1	SLAMF1	SPTAN1	DYNLT1	COLQ	CDC14A	TRADD	RANBP9	CCR9	MYO16	MCF2L2	ICOS	TRAT1	FBXL8	SMAP1	SAMSN1	HAUS3	2017-09-10
CD4+ Tem_HPCA_1	139	ARAF	CAPZB	CCNT1	CD2	CD3E	CD4	CD5	CD40LG	CD52	COPB1	CTLA4	DYNC1H1	E4F1	EMD	GOLGB1	GPI	CXCR3	GRM3	DNAJB1	IDE	IK	IL10RA	ITIH4	ITK	MARK3	NDUFB2	NFKB1	NFRKB	PABPC3	PGK1	PLCL1	PSMD9	RABGGTA	RBL1	RGS1	RPN2	RRM1	S100A11	SELPLG	SLAMF1	SOS1	SPTAN1	SSR2	TAF10	TBCC	TCF20	DYNLT1	TRAF1
CD4+ Tem_HPCA_2	53	AIRE	CD5	CD6	CD28	TNFSF8	CD40LG	CD48	CCR4	CCR6	CCR8	CTLA4	ERN1	GPR15	GZMK	DNAJB1	IL5RA	ITGB7	KLRB1	KRT1	LTA	LTK	OSM	PDCD1	RPL38	RPS21	SPTAN1	TPO	TNFRSF4	TKTL1	HIST1H3A	NCK2	CDC14A	TRADD	DLEC1	STUB1	HMGN4	CCR9	MCF2L2	NCDN	RRS1	ESYT1	GALNT8	GPR171	GLTSCR2	TRAT1	UBASH3A	FXYD7	FBXL8
CD4+ Tem_HPCA_3	10	RPN2	SLAMF1	SPTAN1	TRADD	MYO16	MCF2L2	ESYT1	TRAPPC2L	ARHGAP15	RIC8A
CD4+ Tem_NOVERSHTERN_1	44	AIRE	CD5	CD6	CD28	TNFSF8	CD40LG	CD48	CCR4	CCR6	CCR8	CTLA4	ERN1	GPR15	GZMK	DNAJB1	IL5RA	ITGB7	KLRB1	KRT1	LTA	LTK	OSM	PDCD1	RPL38	RPS21	TPO	TNFRSF4	HIST1H3A	NCK2	CDC14A	TRADD	DLEC1	CCR9	MCF2L2	RRS1	GALNT8	GPR171	GLTSCR2	TRAT1	FXYD7	FBXL8	ARHGAP15	SAMSN1	CCR2
CD4+ Tem_NOVERSHTERN_2	15	AIRE	CD40LG	CD48	CCR6	CCR8	ERN1	KLRB1	LTK	TPO	CCR9	MCF2L2	GALNT8	GLTSCR2	TRAT1	CCR2
CD4+ Tem_NOVERSHTERN_3	15	AIRE	CD40LG	CD48	CCR6	CCR8	ERN1	KLRB1	LTK	TPO	CCR9	MCF2L2	GALNT8	GLTSCR2	TRAT1	CCR2
CD8+ naive T-cells_HPCA_1	62	AMBN	CD8A	CD8B	CCR8	COX4I1	EEF1D	GPR15	HTR1B	SMCP	MYL1	NDUFA1	NDUFA4	NDUFS5	NKTR	OMG	PSG11	SKI	SON	TPP2	SHFM1	HIST1H3A	HIST1H4F	RNMT	BUD31	GPR52	ZNHIT3	RNF7	JOSD1	SLC17A4	BCAS2	RPP38	CGRRF1	RRH	SMR3B	JMJD6	RRP8	CA14	NGDN	C19orf53	SETD2	IL21R	MED31	SS18L2	LUZP4	CDK5RAP1	FXYD7	GDAP2	CCDC87
CD8+ naive T-cells_HPCA_2	28	CD8A	CD8B	EEF1D	GPR15	MYL1	NDUFA4	NDUFS5	PSG11	SKI	SON	HIST1H3A	BUD31	GPR52	ZNHIT3	CGRRF1	RRP8	NGDN	C19orf53	SETD2	MED31	SS18L2	CDK5RAP1	DDX24	PCIF1	MS4A5	HAUS3	LIN28A	TNKS2
CD8+ naive T-cells_HPCA_3	29	CD8A	CD8B	EEF1D	GPR15	KRT1	MYL1	NDUFA4	NDUFS5	PSG11	RFX2	SKI	HIST1H3A	CILP	GPR52	SLC17A4	JMJD6	CA14	NGDN	C19orf53	SETD2	IL21R	MED31	FXYD7	DDX24	MS4A5	HAUS3	LIN28A	TNKS2	GJB4
CD8+ T-cells_BLUEPRINT_1	30	CD8A	CD8B	CD27	CCR7	DSC1	PRMT2	IL16	MMP19	NFKB1	NPAT	PCNT	PFN2	PURA	RING1	MTRF1	TSPAN32	CD96	CEPT1	MSL3	DIDO1	AAK1	RBM34	CLUAP1	CBY1	POP5	RAPGEF6	YLPM1	CRTAM	CIAPIN1	TRAF3IP3
CD8+ T-cells_BLUEPRINT_2	52	CA6	CD7	CD8A	CD8B	CD27	CCR7	CTSW	DSC1	FKTN	PRMT2	IL16	MMP19	NDUFS2	NFKB1	NPAT	PCNT	PFN2	PURA	RING1	S100B	ZNF200	MYOM1	MTRF1	TSPAN32	CD96	CEPT1	SDCCAG3	MSL3	DIDO1	BTN2A1	COG2	AAK1	RBM34	CLUAP1	CBY1	UTP20	UBQLN2	POP5	RAPGEF6	DPP8	CCDC25	POLR3E	NKRF	YLPM1	CRTAM	CIAPIN1	PLXDC1	GGNBP2
CD8+ T-cells_BLUEPRINT_3	21	CA6	CD7	CD8A	CD8B	CD27	CCR7	CTSW	DSC1	PCNT	PFN2	MYOM1	ARHGEF1	MTRF1	MSL3	CLUAP1	POP5	CRTAM	CIAPIN1	NAA16	TRAF3IP3	NDFIP1
CD8+ T-cells_FANTOM_1	52	CA6	CD7	CD8A	CD8B	CD27	CCR7	CTSW	DSC1	FKTN	PRMT2	IL16	MMP19	NDUFS2	NFKB1	NPAT	PCNT	PFN2	PURA	RING1	S100B	ZNF200	MYOM1	MTRF1	TSPAN32	CD96	CEPT1	SDCCAG3	MSL3	DIDO1	BTN2A1	COG2	AAK1	RBM34	CLUAP1	CBY1	UTP20	UBQLN2	POP5	RAPGEF6	DPP8	CCDC25	POLR3E	NKRF	YLPM1	CRTAM	CIAPIN1	PLXDC1	GGNBP2
CD8+ T-cells_FANTOM_2	12	CASP8	CD8A	CD8B	GZMK	PTGDR	SLC1A7	TSPAN32	KLRG1	NPRL2	GIMAP4	CRTAM	ZNF611
CD8+ T-cells_FANTOM_3	40	APBB1	CA6	CD8A	CD8B	DHX15	DSC1	GZMM	HNRNPL	PRMT2	KRT2	LY9	PCNT	PLCG1	PRL	PSD	RASA2	RBL2	RPL37A	S100B	SFPQ	SSTR3	TTN	ZNF154	PRPF4B	MED17	CD96	HNRNPA0	FNBP4	LSM14A	KLHL3	ZBTB11	SHANK1	ZNF639	USP47	CRTAM	ZC3HAV1	PLXDC1	GJC2	GGNBP2	NDFIP1
CD8+ T-cells_HPCA_1	11	CD8A	CD8B	GZMK	IRF3	LY9	TBCC	TSPAN32	KLRG1	DPP8	SDAD1	FTO
CD8+ T-cells_HPCA_2	22	CD3D	CD8A	CD8B	DSC1	GZMK	IRF3	LY9	PCNT	TBCC	RNF113A	TSPAN32	KLRG1	CD160	COG2	COPZ1	MKRN2	DPP8	SDAD1	UBE2Q1	C7orf26	FTO	EML3
CD8+ T-cells_HPCA_3	25	CD8A	CD8B	CD27	CTSW	CX3CR1	EEF1D	GZMH	GZMK	DNAJB1	KLRB1	LAIR2	LY9	PTGDR	PTPN4	RBL2	FBXW4	TSPAN32	KLRG1	CD160	RWDD3	IPCEF1	TOMM7	SIRPG	NAA16	FAM134C
CD8+ T-cells_IRIS_1	10	CD8A	CD8B	DSC1	PCNT	PLCG1	PSD	RBL2	SSTR3	CD96	PLXDC1
CD8+ T-cells_IRIS_2	9	CD8A	CD8B	CD27	DSC1	MMP19	MYOM1	MTRF1	CRTAM	CIAPIN1
CD8+ T-cells_IRIS_3	17	CD8A	CD8B	CD27	DSC1	MMP19	NFKB1	PCNT	RING1	MYOM1	MTRF1	COG2	CBY1	CCDC53	NKRF	CRTAM	CIAPIN1	GGNBP2
CD8+ T-cells_NOVERSHTERN_1	30	CA6	CD8A	CD8B	DHX15	DSC1	PRMT2	KRT2	LY9	PCNT	PLCG1	PRL	PSD	RASA2	RBL2	RPL37A	S100B	SSTR3	TTN	ZNF154	CD96	HNRNPA0	FNBP4	ZBTB11	SHANK1	USP47	CRTAM	ZC3HAV1	PLXDC1	GGNBP2	NDFIP1
CD8+ T-cells_NOVERSHTERN_2	11	CD8A	CD8B	GZMK	IRF3	LY9	TBCC	TSPAN32	KLRG1	DPP8	SDAD1	FTO
CD8+ T-cells_NOVERSHTERN_3	40	APBB1	CA6	CD8A	CD8B	DHX15	DSC1	GZMM	HNRNPL	PRMT2	KRT2	LY9	PCNT	PLCG1	PRL	PSD	RASA2	RBL2	RPL37A	S100B	SFPQ	SSTR3	TTN	ZNF154	PRPF4B	MED17	CD96	HNRNPA0	FNBP4	LSM14A	KLHL3	ZBTB11	SHANK1	ZNF639	USP47	CRTAM	ZC3HAV1	PLXDC1	GJC2	GGNBP2	NDFIP1
CD8+ Tcm_BLUEPRINT_1	9	CASP8	CD27	TNFSF8	GZMK	NCK1	GPR171	CRTAM	PARP11	TMEM30B
CD8+ Tcm_BLUEPRINT_2	40	ADCYAP1R1	ABCD2	ALK	CASP8	CD8A	CD8B	CD27	CD28	TNFSF8	CD48	ESR2	CXCR3	GZMK	LAG3	SH2D1A	MMP11	NCK1	SLC6A7	SYN2	TPP2	DUSP11	HELZ	CD96	ZMYND11	SEC24A	ZC3H13	LEPROTL1	ADAT1	CHST5	SIT1	GPR171	HAO2	GIMAP4	PCDHA10	CRTAM	PARP11	SMAP1	VPS33A	TMEM30B	GIMAP6
CD8+ Tcm_BLUEPRINT_3	16	ADCYAP1R1	CASP8	CD8B	CD27	TNFSF8	ESR2	GZMK	SH2D1A	NCK1	CD96	ZMYND11	SIT1	GPR171	CRTAM	PARP11	TMEM30B
CD8+ Tcm_HPCA_1	23	CASP8	CD8A	CD8B	CD27	GZMK	DNAJB1	LAG3	SH2D1A	RASA2	RGS1	DYNLT1	TPP2	CDC14A	CGRRF1	DCTN6	PPWD1	ADAT1	CRTAM	PARP11	USP36	HAUS3	NAA16	TMEM30B
CD8+ Tcm_HPCA_2	10	CD8A	CD8B	CTSW	GZMK	IL2RB	SH2D1A	GPR171	CRTAM	USP36	TMEM30B
CD8+ Tcm_HPCA_3	53	BMPR1A	C21orf2	CASP8	CD3E	CD8A	CD8B	CD27	CD28	CTSW	GZMH	GZMA	GZMK	DNAJB1	IL2RB	INPP4A	KIF2A	KLRD1	KRT1	LAG3	SH2D1A	PTPN4	RASA2	RGS1	RPS6KB1	ATXN7	DYNLT1	TPP2	ZAP70	DUSP11	CDC14A	TRADD	LRIG2	MED6	KLRG1	CD96	CGRRF1	DCTN6	ZBTB1	TNRC6B	PPWD1	ADAT1	GPR171	ATF7IP	CRTAM	PARP11	CYP20A1	USP36	HAUS3
CD8+ Tcm_NOVERSHTERN_1	30	ABCD2	CD3E	CD7	CD8A	CD8B	CXCR3	GZMK	LAG3	SH2D1A	PDCD1	PTPRCAP	S100B	XCL1	SGCD	TBCC	HIST1H4F	KLRG1	STUB1	HMGN4	AKAP3	GNLY	TRAF3IP1	GPR171	ELP3	GIMAP4	CRTAM	C21orf59	WDR18	INTS5	GIMAP6
CD8+ Tcm_NOVERSHTERN_2	24	ABCD2	CD3E	CD7	CD8A	CD8B	CXCR3	GZMK	LAG3	SH2D1A	PDCD1	PTPRCAP	S100B	XCL1	SGCD	HIST1H4F	KLRG1	STUB1	AKAP3	GNLY	TRAF3IP1	GPR171	ELP3	CRTAM	INTS5
CD8+ Tcm_NOVERSHTERN_3	10	CD8B	CXCR3	GZMK	PTPRCAP	SGCD	HIST1H4F	STUB1	ELP3	CRTAM	INTS5
CD8+ Tem_BLUEPRINT_1	10	DHX8	GZMH	GZMK	LAG3	ZAP70	COLQ	RGS9	CXCR6	PVRIG	PYHIN1
CD8+ Tem_BLUEPRINT_2	144	ABCF1	ACADVL	RHOG	SLC25A20	CAPZB	CD2	CD3D	CD3G	CD7	CD8A	CD8B	CCR5	COPB1	CTSW	CX3CR1	DAXX	DHX8	DIAPH1	DMWD	DYNC1H1	EMD	GOLGA1	GTF3C1	GYG1	GZMH	GZMA	GZMK	GZMM	HMOX2	DNAJB1	IDH3B	IFNG	IL10RA	ITGAL	KLRB1	KLRD1	LAG3	LAIR2	MARK3	MT2A	MYO1F	NDUFB1	NDUFB2	NDUFS6	NKG7	PABPC3	PCNT	PHKG2
CD8+ Tem_BLUEPRINT_3	64	SLC25A20	CALM1	CD2	CD3D	CD3G	CD8A	CD8B	CTSW	DMWD	GYG1	GZMH	GZMA	GZMB	GZMK	GZMM	IFNG	IL2RB	ITGAL	KLRB1	KLRD1	LAG3	SH2D1A	MT2A	MYO1F	NKG7	PPP1CA	PRF1	MAPK13	PTGDR	PTPN4	PTPRA	PZP	CCL4	SLAMF1	SNTB2	STX4	COLQ	GPR65	RGS9	IL18RAP	CROCC	KLRG1	GNLY	NPRL2	CXCR6	CD160	CD300A	GPR171
CD8+ Tem_HPCA_1	168	ABCD2	FASLG	ATR	BMPR1A	C8G	C21orf2	CACNB1	CAPN2	CASP8	CD2	CD3D	CD3G	CD8A	CD8B	CCR5	CSNK1G2	CX3CR1	DUSP8	E4F1	FLT4	GIPR	GOLGA4	CXCR3	GTF3C1	GZMH	GZMA	GZMB	GZMK	GZMM	HLA-A	HLCS	IFNG	KLRD1	KIF22	LAG3	LTK	SH2D1A	MAN2C1	MEN1	MAP3K10	MSH3	NKG7	PDCD1	PLCG1	PMS1	POLG	PPP2R5C	PRF1
CD8+ Tem_HPCA_2	162	ABCD2	FASLG	ATR	BMPR1A	C8G	C21orf2	CACNB1	CAPN2	CASP8	CD2	CD3D	CD3E	CD3G	CD8A	CD8B	CCR5	CTBP1	CX3CR1	DUSP8	E4F1	ELK4	ERN1	FLT4	GIPR	GOLGA4	CXCR3	GTF3C1	GZMH	GZMA	GZMB	GZMK	GZMM	HLA-A	HLCS	IFNG	IL12RB1	IRF3	ITGAL	KLRB1	KLRD1	LAG3	LTK	SH2D1A	MAN2C1	MEN1	MAP3K10	NKG7	PDCD1
CD8+ Tem_HPCA_3	41	ABCD2	BMPR1A	C8G	CACNB1	CASP8	CD8A	DUSP8	GZMH	IFNG	LAG3	LTK	SH2D1A	MSH3	PDCD1	PPP2R5C	PURA	S100B	XCL1	FBXW4	TBCC	TCOF1	ARHGEF5	CDK10	SLC25A12	KLRG1	HMGN4	CXCR6	CEP250	IKZF3	ADAT1	RPUSD2	ASTE1	GPR171	COL5A3	GIMAP4	PVRIG	FYCO1	GCC1	MRFAP1L1	ZNF428	GIMAP6
CD8+ Tem_NOVERSHTERN_1	25	FASLG	C8G	CACNB1	CD8A	CD8B	CX3CR1	GZMH	GZMB	GZMK	IFNG	LAG3	LTK	SH2D1A	PDCD1	PRF1	PTGDR	RBL2	SLC1A7	ZAP70	KLRG1	NMUR1	CXCR6	TBX21	COL5A3	PYHIN1
CD8+ Tem_NOVERSHTERN_2	20	FASLG	C8G	CD8A	CD8B	CX3CR1	GZMH	GZMB	GZMK	IFNG	PDCD1	PRF1	PTGDR	SLC1A7	ZAP70	KLRG1	NMUR1	CXCR6	TBX21	COL5A3	PYHIN1
CD8+ Tem_NOVERSHTERN_3	22	FASLG	C8G	CACNB1	CD8A	CD8B	CX3CR1	GZMH	GZMB	GZMK	IFNG	SH2D1A	PDCD1	PRF1	PTGDR	SLC1A7	ZAP70	KLRG1	NMUR1	CXCR6	TBX21	COL5A3	PYHIN1
cDC_HPCA_1	14	ALCAM	ANXA1	CD1C	CD1E	DBI	FCER1A	ITGAX	PITPNA	SSR1	RAB7A	CLEC10A	TCTN3	CCDC88A	SLAMF8
cDC_HPCA_2	12	ALCAM	CD1C	CD1E	DBI	FCER1A	ITGAX	SSR1	RAB7A	ACTR3	CLEC10A	CCDC88A	SLAMF8
cDC_HPCA_3	11	CD1C	CD86	FCER1A	FLT3	S100A10	CD163	CLEC10A	FGL2	CD93	WDFY3	CLEC4A
cDC_NOVERSHTERN_1	13	CD1A	CD1B	CD1C	CD1E	CD80	DNASE1L3	FCER1A	GFRA2	CCL17	CCL24	RRP1B	CD209	KCNK13
cDC_NOVERSHTERN_2	12	CD1A	CD1B	CD1C	CD1E	CD80	DNASE1L3	FCER1A	GFRA2	CCL17	CCL24	CD209	KCNK13
cDC_NOVERSHTERN_3	20	ALOX15	CD1A	CD1B	CD1C	CD1E	CD80	CD86	CRH	DNASE1L3	FCER1A	GFRA2	CCL13	CCL17	CCL23	CCL24	ALDH1A2	CLEC10A	RRP1B	CD209	KCNK13
Chondrocytes_ENCODE_1	20	ACAN	ARL1	COMP	ERG	ISLR	OGN	PGK1	PRELP	COL14A1	RGS11	TBX4	MORF4L2	LAPTM4A	SNUPN	MPHOSPH6	SCRG1	FBXW11	REM1	ZNF471	PODNL1
Chondrocytes_ENCODE_2	23	ACAN	ARL1	COMP	ERG	GLG1	ISLR	OGN	PGK1	PRELP	COL14A1	PTP4A2	RGS11	TBX4	GOSR2	MORF4L2	LAPTM4A	SNUPN	MPHOSPH6	SCRG1	FBXW11	REM1	ZNF471	PODNL1
Chondrocytes_ENCODE_3	47	ACAN	CCNB1	COL10A1	COMP	CSNK1A1	ERG	FOXD2	LPAR4	ISLR	MYOC	NFATC4	NKX3-1	OMD	PRELP	STAT2	TNXB	COL14A1	PTP4A2	GDF5	FZD9	CILP	TNFSF11	WASL	TBX4	TMEM59	MORF4L2	LAPTM4A	SNUPN	MPHOSPH6	PRG4	ANGPTL7	SLC38A3	DSTN	WWP2	SCRG1	IQSEC2	FBXW11	HSPB7	REM1	COL5A3	CRTAC1	NPLOC4	ZNF471	PODNL1	NDFIP1	DYNLRB1	LRRC15
Chondrocytes_FANTOM_1	193	ADRA1D	ACAN	AK1	ABCD1	APOC3	ARCN1	ARL1	ARNT	CACNA1C	CACNB1	CAMLG	RUNX2	RUNX1	COL10A1	COMP	COPA	COPB1	CYP19A1	DMWD	DPT	DVL1	ELN	ENO1	ERF	ETF1	FGF7	FOXC2	FSHB	GOLGA4	MCHR1	GRIA3	HAS1	HDLBP	HOXD3	IBSP	IDUA	IFNB1	IGF1	ISLR	KRT10	LEP	LTBR	SMAD5	MIF	MLN	MLLT1	NFATC4	NFKBIL1
Chondrocytes_FANTOM_2	107	ADRA1D	ACAN	AK1	APOC3	ARNT	CACNA1C	CAMLG	RUNX2	RUNX1	COL10A1	COMP	COPA	CYP19A1	DPT	DVL1	ELN	ERF	FGF7	GRIA3	HAS1	HDLBP	IBSP	IFNB1	ISLR	MIF	MLLT1	NFATC4	NFKBIL1	OMD	OGN	P4HB	PCDHGC3	PRELP	PYY	PTH1R	CLEC3B	TUB	COL14A1	ZFPL1	ZBTB16	GDF5	CILP	PRKRA	WISP1	MAP3K6	CABP1	BAG3	TTC37
Chondrocytes_FANTOM_3	108	ADRA1D	ACAN	AK1	ARL1	CACNA1C	CAMLG	RUNX1	COL10A1	COMP	CYP19A1	DPT	DVL1	ELN	ENO1	ERF	FGF7	FSHB	GOLGA4	MCHR1	GRIA3	HAS1	HDLBP	IBSP	IDUA	IGF1	ISLR	KRT10	LEP	MLLT1	NFATC4	NFKBIL1	OMD	OGN	P4HB	PDE3A	PGM1	PRELP	PYY	SGCD	SNTB2	TF	CLEC3B	TNNT3	COL14A1	ZFPL1	ZBTB16	CDK2AP1	GDF5
Chondrocytes_HPCA_1	16	ACAN	COMP	CSNK1A1	ERG	ISLR	NFATC4	PRELP	COL14A1	TBX4	MORF4L2	MPHOSPH6	DSTN	SCRG1	HSPB7	REM1	PODNL1
Chondrocytes_HPCA_2	12	ACAN	COMP	ERG	ISLR	LBP	PRELP	COL14A1	TBX4	MPHOSPH6	SCRG1	HSPB7	REM1
Chondrocytes_HPCA_3	11	ACAN	COMP	ERG	ISLR	PRELP	COL14A1	RGS11	TBX4	MPHOSPH6	SCRG1	REM1
Class-switched memory B-cells_BLUEPRINT_1	12	TNFRSF17	BLK	CR1	EPS15	RAPGEF1	PTPN6	RAD17	TRAF3	UBE2G1	UBE2I	BAIAP3	DEPDC5
Class-switched memory B-cells_BLUEPRINT_2	28	TNFRSF17	BLK	CR1	EPS15	RAPGEF1	NDUFA9	PTPN6	RAD17	SLC12A3	TAF6	TRAF3	UBE2G1	UBE2I	UBE2N	TRRAP	BAIAP3	DEPDC5	SCRN1	ABI1	CPSF4	SUB1	SP140	TNFRSF13B	ADAMDEC1	AFTPH	PRDM10	NARFL	PIKFYVE
Class-switched memory B-cells_BLUEPRINT_3	20	TNFRSF17	BLK	CR1	EPS15	RAPGEF1	NDUFA9	PTPN6	RAD17	TRAF3	UBE2G1	UBE2I	BAIAP3	DEPDC5	ABI1	SEC24A	TNFRSF13B	AFTPH	NGLY1	PRDM10	PIKFYVE
Class-switched memory B-cells_NOVERSHTERN_1	16	TNFRSF17	BLK	CXCR5	MS4A1	CD80	COL19A1	GPR25	HLA-DQB2	PAX5	SPIB	BAIAP3	TNFRSF13B	SNED1	ZBTB32	FCRL2	KHDRBS2
Class-switched memory B-cells_NOVERSHTERN_2	14	BLK	CXCR5	MS4A1	CD80	COL19A1	GPR25	HLA-DQB2	PAX5	SPIB	BAIAP3	TNFRSF13B	SNED1	ZBTB32	FCRL2
Class-switched memory B-cells_NOVERSHTERN_3	14	BLK	CXCR5	MS4A1	CD80	COL19A1	GPR25	HLA-DQB2	PAX5	SPIB	BAIAP3	TNFRSF13B	SNED1	ZBTB32	FCRL2
CLP_BLUEPRINT_1	11	COX6C	DNTT	IGLL1	PLP2	PSMA6	VPREB1	AIMP1	TOMM20	GPN3	HIVEP3	MYL12B
CLP_BLUEPRINT_2	17	COX6C	DNTT	H3F3B	IDH3A	IGLL1	OXA1L	PLP2	PSMA6	SNRPD1	VPREB1	AIMP1	ADNP	C19orf53	GPN3	C11orf57	HIVEP3	FAM76A
CLP_BLUEPRINT_3	31	CALM1	COX6C	DNTT	GAPDH	H3F3B	IDH3A	IGBP1	IGLL1	OXA1L	PLP2	PSMA6	PSMB3	RFC4	RPL8	SNRPD1	VPREB1	AIMP1	ATP6V1G1	TOMM20	METAP2	DSTN	ADNP	C19orf53	ASCC1	GPN3	C11orf57	WDR33	NGLY1	HIVEP3	MYL12B	FAM76A
CMP_BLUEPRINT_1	18	AZU1	MS4A3	CPA3	CRHBP	CRYGD	CTSG	ELANE	MS4A2	IGLL1	MPO	SERPINB10	PRG2	PRTN3	RNASE2	RNASE3	STAR	EPX	NAALADL1
CMP_BLUEPRINT_2	19	AZU1	MS4A3	CLC	CPA3	CRHBP	CTSG	ELANE	MS4A2	FLT3	HDC	MPO	SERPINB10	PRG2	PRTN3	RNASE2	RNASE3	EPX	NAALADL1	HPGDS
CMP_BLUEPRINT_3	15	AZU1	MS4A3	CLC	CPA3	CRHBP	CTSG	ELANE	FLT3	MPO	PRG2	PRTN3	RNASE2	RNASE3	EPX	HPGDS
CMP_HPCA_1	173	ALOX15	ANXA3	AZU1	BYSL	C1QB	CACNA1E	CAMK2A	RUNX1	CCNC	CD1E	MS4A3	CD63	CDSN	CLC	CLIC1	CNGA3	CPA3	CPB1	CPN1	CRYGA	CSF2RB	CTSG	DAB1	DEFA6	EDN3	EYA3	MS4A2	FMO2	AFF2	G6PC	GALR1	GDF9	GNAT1	GPD1	GRIA4	GRM2	GUCA2B	H2AFX	HDC	HSF4	IDUA	IL5RA	IL13	IMPG1	PDX1	ITIH3	ITIH4	KCNJ10
CMP_HPCA_2	79	ADSS	MS4A3	MAPK14	TOR1A	FANCG	MS4A2	LPAR4	GPR27	LTC4S	LYL1	MPO	MYO9A	PGM1	POLE	MAP2K5	TRIM27	RNASE2	RREB1	SPN	STAR	TFCP2	TOP2B	TPSAB1	WHSC1	XPO1	ZNF221	HIST1H2BL	HIST1H2BO	HIST1H3C	HIST1H4C	NSMAF	JRK	ZMYM4	TGM5	SCAMP1	HDAC6	ZNF197	ERLIN1	TAF6L	USP19	EHMT2	HMGXB3	SMC5	MGA	KIAA1033	ZNF629	TNPO3	ZKSCAN5
CMP_HPCA_3	14	MS4A3	MS4A2	GPR27	LTC4S	LYL1	MPO	STAR	TPSAB1	ZNF221	HIST1H2BO	HIST1H3C	NAT6	CENPJ	BAHCC1
CMP_NOVERSHTERN_1	28	MS4A3	CD33	TOR1A	LPAR4	GPR27	MPO	TFCP2	TPSAB1	HIST1H4C	ZMYM4	TGM5	HDAC6	ZNF197	ERLIN1	TNPO3	NAT6	ZZZ3	SPAG8	FBXL4	ZNF701	CENPJ	ZNF471	S100PBP	ZKSCAN3	TSGA10	CDT1	ATP8B3	ZNF324B
CMP_NOVERSHTERN_2	14	TOR1A	LPAR4	GPR27	MPO	ZMYM4	TGM5	HDAC6	ZNF197	ERLIN1	TNPO3	SPAG8	ZNF701	ZNF471	ZKSCAN3
CMP_NOVERSHTERN_3	20	MS4A2	LPAR4	GPR27	LTC4S	LYL1	MPO	TRIM27	STAR	TPSAB1	ZNF221	HIST1H2BO	HIST1H3C	ZNF197	ZNF629	SPAG8	PHF7	CENPJ	BAHCC1	ATP8B4	ZKSCAN3
DC_BLUEPRINT_1	8	ALOX15	CD1A	CD1B	CD1E	CCL13	CCL17	ALDH1A2	CD209
DC_BLUEPRINT_2	9	ALOX15	CD1A	CD1B	CD1E	HLA-DQA1	CCL13	CCL17	ALDH1A2	CD209
DC_BLUEPRINT_3	8	ALOX15	CD1A	CD1B	CD1E	FPR3	CCL13	CCL17	CD209
DC_FANTOM_1	14	C1QA	C1QB	CD1A	CD1B	CD1E	CD9	FPR3	CCL13	CCL17	CCL22	CLEC10A	TFEC	TREM2	SLAMF8
DC_FANTOM_2	63	ACHE	ALOX15B	CD1A	CD1B	CD1E	CD80	CD86	CCR7	DPYS	ETV3	GRIN1	GRSF1	HCRTR2	IL12B	IRF4	KCNC3	KCNN1	LOR	MCF2	RAB8A	NFKB1	PLD2	PRRG2	PTGIR	RNF2	CCL13	CCL17	CCL18	CCL22	CCL23	SLAMF1	SIGLEC1	TRAF1	TNFRSF4	TXN	VAV2	SLC30A4	CUL1	MAP3K6	TMSB10	MAP3K13	CEP350	BCL2L11	MPHOSPH6	SPINT2	HPS5	NXPH3	TDRD7
DC_FANTOM_3	21	ALCAM	C1QA	C1QB	CD1A	CD1B	CD1C	CD1E	F13A1	FCER2	FPR3	TACSTD2	CCL13	CCL17	CCL22	CLEC10A	SPINT2	STAB1	CD209	TREM2	SLAMF8	MS4A6A
DC_HPCA_1	11	ALOX15	CD1B	CD1E	CD80	CCL13	CCL17	CCL18	CCL19	CCL22	CD209	SLCO5A1
DC_HPCA_2	11	ALOX15	CD1B	CD1E	CD80	CCL13	CCL17	CCL18	CCL19	CCL22	CD209	SLCO5A1
DC_HPCA_3	8	ALOX15	CD1B	CD1E	CCL13	CCL17	CCL18	CCL19	SLCO5A1
DC_IRIS_1	8	CD1B	CD1E	CD86	FCER2	CCL17	ALDH1A2	RRP1B	KCNK13
DC_IRIS_2	31	ALOX15	C1QB	CD1A	CD1B	CD1E	CD80	CD86	DNASE1L3	F13A1	FCER2	FPR3	GUCA1A	HK3	HLA-DQA1	CCL8	CCL13	CCL17	CCL18	CCL22	CCL23	CCL24	ALDH1A2	HS3ST2	CLEC10A	SPINT2	FGL2	CD209	NAGPA	MS4A4A	KCNK13	MS4A6A
DC_IRIS_3	17	ALOX15	C1QB	CD1A	CD1B	CD1E	CD86	FPR3	HLA-DQA1	CCL13	CCL17	CCL18	CCL22	CCL23	ALDH1A2	HS3ST2	CLEC10A	CD209
Endothelial cells_BLUEPRINT_1	8	ACVRL1	TIE1	VWF	HYAL2	ARHGEF15	ROBO4	MMRN2	FAM124B
Endothelial cells_BLUEPRINT_2	8	ACVRL1	TIE1	VWF	HYAL2	ARHGEF15	ROBO4	MMRN2	FAM124B
Endothelial cells_BLUEPRINT_3	141	ACVRL1	ADSS	AP2A2	ANGPT2	ANXA2	ANXA3	RHOC	BMX	PTTG1IP	CANX	CAV1	CCT6A	CD9	CDC27	AP2S1	CLTA	DAD1	DDX10	EIF4G2	ERG	FOXC2	FLT1	FLT4	GJA4	GNB1	GOT2	GPR4	HSPA4	HTR2B	KDR	TNPO1	MNAT1	MYL6	NEDD8	NNAT	NOTCH4	PNP	PDE3A	PIK3C2A	PLS3	PPP2R2A	PSMB7	PSMD1	PSMD2	PSMD10	RALA	RANGAP1	RARS
Endothelial cells_ENCODE_1	51	ACVRL1	ANGPT2	ANXA2	RHOC	BMX	PTTG1IP	CAV1	CLTA	DAD1	ERG	FOXC2	GPR4	KDR	MYL6	PIK3C2A	PLS3	PSMD10	RALA	MAPK12	SLC16A1	TEK	TIE1	CLDN5	VWF	HYAL2	FEZ2	ACTR1A	TXNDC9	PCGF3	COPS6	PWP1	FAM107A	ECD	ARHGEF15	MMRN1	CD93	TTLL5	MTCH1	CLEC1A	PCDH12	EMCN	SOX18	ROBO4	RASIP1	LRRC59	MRPL17	CXorf36	MMRN2
Endothelial cells_ENCODE_2	42	ACVRL1	ANGPT2	ANXA2	RHOC	BMX	PTTG1IP	CAV1	CLTA	ERG	GPR4	KDR	PLS3	PSMD10	RALA	MAPK12	SLC16A1	TIE1	CLDN5	VWF	HYAL2	ACTR1A	PCGF3	COPS6	PWP1	FAM107A	ARHGEF15	MMRN1	CD93	TTLL5	MTCH1	CLEC1A	PCDH12	EMCN	SOX18	ROBO4	RASIP1	MRPL17	CXorf36	MMRN2	MYCT1	PLVAP	KANK3
Endothelial cells_ENCODE_3	25	ACVRL1	ANGPT2	RHOC	BMX	CLTA	GPR4	KDR	PLS3	PSMD10	RALA	MAPK12	TIE1	VWF	HYAL2	ACTR1A	ARHGEF15	CLEC1A	EMCN	SOX18	ROBO4	RASIP1	CXorf36	MMRN2	MYCT1	KANK3
Endothelial cells_FANTOM_1	10	ACVRL1	ANGPT2	KDR	TIE1	HYAL2	ARHGEF15	EMCN	ROBO4	MMRN2	MYCT1
Endothelial cells_FANTOM_2	11	ACVRL1	ANGPT2	BMX	KDR	TIE1	HYAL2	ARHGEF15	EMCN	ROBO4	MMRN2	MYCT1
Endothelial cells_FANTOM_3	40	ACVRL1	ANGPT2	ANXA3	ART4	BMX	CAV1	ERG	FLT1	GJA4	GPR4	HTR2B	KDR	KRT19	TACSTD2	PDE3A	RALA	MAPK12	SELE	SNTB2	TIE1	CLDN5	VWF	HYAL2	EIF2B2	TNFSF18	GDF3	IGF2BP3	ARHGEF15	MMRN1	CD93	CLEC1A	EMCN	SOX18	ROBO4	RASIP1	CXorf36	MMRN2	FAM124B	MYCT1	KANK3
Endothelial cells_HPCA_1	12	ANGPT2	BMX	KDR	TIE1	CLDN5	VWF	MMRN1	CD93	STAB1	EMCN	ROBO4	GIMAP4
Endothelial cells_HPCA_2	8	ANGPT2	BMX	FLT4	KDR	TIE1	VWF	SEMA6B	MMRN1
Endothelial cells_HPCA_3	69	ACVRL1	CDC27	AP2S1	ERCC1	FBL	FDPS	FOXC2	FLT4	GJA4	GPR4	HTR1B	LYL1	NOTCH4	NOVA2	PNP	PPP2R2A	PSMC5	RALA	RELA	RPS14	MAPK12	TIE1	CLDN5	VWF	CLPP	SCARF1	HYAL2	EIF2B2	MTMR2	BCL10	TNFSF18	BUB3	TAOK2	DLGAP5	ACTR1A	LYPLA1	STK25	SEMA6C	SEMA6B	PTTG2	WDR4	LYVE1	STRAP	TUSC2	ARHGEF15	CD93	TTLL5	N4BP3
Eosinophils_BLUEPRINT_1	18	C3AR1	CLC	CCR3	DRP2	IL5RA	KCNA5	KIF5A	TACSTD2	NPY2R	PLXNB3	RGS13	TNFSF11	ADAM18	CUX2	CDH19	RASL12	HRH4	NYX
Eosinophils_BLUEPRINT_2	15	CCR3	DRP2	GIPR	TACSTD2	RGS13	SYCP1	PHLDA2	TNFSF11	NXPH3	LMTK2	AP4E1	FBXO40	HRH4	TRIM48	MMRN2
Eosinophils_BLUEPRINT_3	46	AGTR2	ASPA	ATOH1	BMX	C3AR1	MS4A3	CLC	CCR1	CCR3	DRP2	FCER1A	FMO3	GAST	GIPR	HDC	IL5RA	KCNA5	KIF5A	LECT2	TACSTD2	MOG	NPY2R	PLXNB3	PRL	RGS13	STATH	TNFSF11	ADAM21	ADAM18	HS3ST2	ZNF197	POLQ	NXPH3	LMTK2	CUX2	CDH19	PURG	RASL12	FBXO40	MYO3A	FEV	LRRC36	MMP26	HRH4	NYX	TRIM48
Eosinophils_FANTOM_1	38	ADORA3	ALOX15	CA4	ENTPD2	CEBPE	CEACAM8	CLC	CCR3	DEFA4	GIPR	HIC1	IL5RA	LTF	MNT	RARA	SLC19A1	KSR1	PGLYRP1	CD101	P2RY14	KCNK7	OLIG2	PTTG2	EPN2	SETD1B	KDM6B	ABTB2	SIGLEC8	GMIP	CYSLTR2	MKL1	HRH4	DPEP2	MMP25	MBOAT7	CORO7	ARHGAP33	TRPM6
Eosinophils_FANTOM_2	34	ADORA3	ALOX15	CA4	ENTPD2	CEBPE	CLC	CCR3	DEFA4	GIPR	IL5RA	LTF	MNT	RARA	SLC19A1	KSR1	PGLYRP1	KCNK7	OLIG2	PTTG2	EPN2	SETD1B	KDM6B	ABTB2	SIGLEC8	GMIP	CYSLTR2	MKL1	HRH4	DPEP2	MMP25	MBOAT7	CORO7	ARHGAP33	TRPM6
Eosinophils_FANTOM_3	44	ADORA3	ALOX15	BPI	CA4	CAMP	ENTPD2	CEBPE	CEACAM8	CLC	CCR3	CSF2RB	DEFA4	GIPR	HIC1	IL5RA	LTF	MNT	RARA	CCL23	SLC19A1	KSR1	PGLYRP1	CD101	P2RY14	KCNK7	OLIG2	PTTG2	EPN2	SETD1B	KDM6B	SRRM2	ABTB2	SIGLEC8	GMIP	CYSLTR2	MKL1	HRH4	DPEP2	DPEP3	MMP25	MBOAT7	CORO7	ARHGAP33	TRPM6
Eosinophils_NOVERSHTERN_1	16	ALOX15	CEBPE	CLC	CCR3	DEFA4	IL5RA	RARA	KCNK7	EPN2	KDM6B	ABTB2	SIGLEC8	HRH4	DPEP2	MMP25	TRPM6
Eosinophils_NOVERSHTERN_2	13	ALOX15	CEBPE	CLC	CCR3	DEFA4	IL5RA	KSR1	ABTB2	SIGLEC8	HRH4	DPEP2	MMP25	TRPM6
Eosinophils_NOVERSHTERN_3	15	ENTPD2	CEBPE	CLC	CCR3	GIPR	HIC1	IL5RA	LTF	KSR1	OLIG2	SIGLEC8	HRH4	DPEP2	CORO7	ARHGAP33
Epithelial cells_ENCODE_1	9	SFN	TACSTD2	PRSS8	AP1M2	B3GNT3	CBLC	HES2	RAB25	S100A14
Epithelial cells_ENCODE_2	21	FLNB	SFN	GRB7	LAD1	LAMA5	PRSS8	SEMA3F	SOX15	TUFT1	SLC10A3	IER3	SH2D3A	AP1M2	CNKSR1	B3GNT3	RHOD	HES2	TMEM40	TBC1D2	RAB25	S100A14
Epithelial cells_ENCODE_3	85	BIK	AP1S1	DFNA5	DSG3	HBEGF	EFNB1	NR2F6	EVPL	EXT2	F3	FLNB	GJB3	GJB5	SFN	GRB7	IRF6	JUP	LAD1	LAMA5	LIMK2	TACSTD2	MST1R	PI3	PLAGL2	PRRG2	PRSS8	RELB	SEMA3F	SHC1	SLC12A4	SOX15	SPINT1	ST14	STXBP2	TAPBP	TUFT1	CORO2A	BTG2	SLC10A3	AXIN1	TNK1	TNFSF9	ADAM15	TNFRSF10B	IER3	RPS6KA4	PDLIM1	CELSR1
Epithelial cells_FANTOM_1	17	CLDN4	DSC2	SFN	ITGB4	ITGB6	KRT7	LAD1	LAMA3	LAMB3	SPINT1	THBD	SH2D3A	AP1M2	MPZL2	G0S2	LSR	RAB25
Epithelial cells_FANTOM_2	45	ADM	CLDN4	DSC2	EFNA1	EGFR	EVPL	SFN	ITGB4	ITGB6	KRT7	KRT17	LAD1	LAMA3	LAMB3	LLGL2	TACSTD2	PCDH1	PDGFB	PPL	PRSS8	S100A2	SCNN1A	SPINT1	ST14	THBD	HMGA2	PTGES	RAB3D	SH2D3A	AP1M2	TSPAN1	MPZL2	PPP1R13L	RAP1GAP2	DAPP1	G0S2	ANGPTL4	LSR	SLC35F2	EPS8L1	FERMT1	RAB25	C1orf116	RAB11FIP1	ALS2CL
Epithelial cells_FANTOM_3	23	CLDN4	DSC2	ELF3	SFN	ITGB4	ITGB6	KRT6A	KRT7	LAD1	LAMA3	LAMB3	SLPI	ST14	TGFA	SCEL	PTGES	SH2D3A	AP1M2	MPZL2	EHF	G0S2	LSR	S100A14
Epithelial cells_HPCA_1	9	F3	SFN	TACSTD2	PRSS8	SLPI	AP1M2	CBLC	RAB25	S100A14
Epithelial cells_HPCA_2	9	F3	SFN	PRSS8	SLPI	STXBP2	AP1M2	CBLC	RAB25	S100A14
Epithelial cells_HPCA_3	19	NQO1	F3	FLNB	SFN	TACSTD2	PRSS8	SDC4	SLPI	STXBP2	RASSF7	AP1M2	B3GNT3	SH3BP1	CBLC	APOBEC3C	RIPK4	HES2	RAB25	S100A14
Erythrocytes_BLUEPRINT_1	12	ALAS2	CA1	EPB42	GYPE	HBD	HMBS	MYL4	RHAG	EPX	KLF1	XPO7	AHSP
Erythrocytes_BLUEPRINT_2	12	ALAS2	CA1	EPB42	GYPE	HBD	HMBS	MYL4	RHAG	EPX	KLF1	XPO7	AHSP
Erythrocytes_BLUEPRINT_3	12	ALAS2	CA1	EPB42	GYPE	HBD	HMBS	MYL4	RHAG	EPX	KLF1	XPO7	AHSP
Erythrocytes_FANTOM_1	9	ALAS2	CA1	EPB42	GYPA	GYPE	KRT1	MYL4	SLC4A1	AHSP
Erythrocytes_FANTOM_2	17	ALAS2	EPB42	GYPA	GYPB	GYPE	HBB	HBD	MYL4	PKLR	PRG2	RHAG	RHCE	RHD	SLC4A1	KLF1	AHSP	TSPO2
Erythrocytes_FANTOM_3	15	ALAS2	ART4	EPB42	GYPA	GYPB	GYPE	HBB	HBD	HMBS	MYL4	PKLR	RHAG	RHD	KLF1	AHSP
Erythrocytes_HPCA_1	8	CENPA	GATA1	RHAG	SPTA1	AURKA	KLF1	GLRX5	AHSP
Erythrocytes_HPCA_2	12	ALAS2	CA1	EPB42	GYPE	HBD	HMBS	MYL4	RHAG	EPX	KLF1	XPO7	AHSP
Erythrocytes_HPCA_3	12	ALAS2	CA1	EPB42	GYPE	HBD	HMBS	MYL4	RHAG	EPX	KLF1	XPO7	AHSP
Erythrocytes_NOVERSHTERN_1	75	APLNR	ALAS2	ATP1B2	BRCA1	BUB1B	CDC20	CDKN3	CENPF	CHEK1	DES	EPB42	FEN1	GYPA	GYPB	GYPE	HBB	HMBS	HMGB2	KEL	KIF22	EPCAM	MCM4	MYL4	NEK2	OAT	PCNA	PKLR	POLE2	PRG2	RHD	RRM1	RRM2	STIL	SLC2A4	SLC4A1	AURKA	TOP2A	TUBG1	ST7	HIST1H4C	RAD54L	CCNB2	MINPP1	DLGAP5	MELK	GINS1	TROAP	TRIM10
Erythrocytes_NOVERSHTERN_2	40	ALAS2	BRCA1	CENPF	DES	EPB42	FEN1	GYPA	GYPB	GYPE	HBB	HMBS	HMGB2	KIF22	MYL4	NEK2	PCNA	PKLR	POLE2	RHD	RRM1	TOP2A	TUBG1	CCNB2	MINPP1	DLGAP5	MELK	GINS1	TROAP	PRMT3	UBAC1	KLF1	GMNN	NUSAP1	AHSP	DTL	FANCI	MCM10	CENPN	FKBPL	CDCA3
Erythrocytes_NOVERSHTERN_3	99	ALAS2	AMHR2	BIRC5	ART4	ATP1B2	BRCA1	BUB1	CA1	CAST	CCNA2	CCNB1	CDK1	CDC20	CDKN3	CENPE	CENPF	CSE1L	DES	EPB42	EPRS	FEN1	GATA1	GYPA	GYPB	GYPE	HBB	HBD	HMBS	HMGB2	HPS1	KEL	KIF22	EPCAM	MYL4	NEK2	PCNA	PKLR	PNMT	POLE2	PRG2	RAD51	RFC4	RHAG	RHD	RPA3	RRM1	RRM2	STIL
Fibroblasts_ENCODE_1	136	ADH5	ARF4	ARL1	ASPA	ATP2A2	BAD	BMPR1A	CACNA1C	AP2M1	CSNK1A1	CSNK1G3	DCTD	DPT	ECT2	ELN	ETF1	FKTN	FGF7	GARS	GOLGA4	GRIA1	GRIA3	HIF1A	HLCS	HTR2A	HTR2B	ITIH3	IPO5	KRT19	LGALS1	SMAD5	MARS	MYH1	MYH2	2017-09-02	NFATC4	OCRL	PPIB	PRKG1	PTGIR	RAD23B	RCN2	PRPH2	RYK	ATXN2	SGCD	SGCG	SHMT2
Fibroblasts_ENCODE_2	71	ARF4	ATP2A2	BMPR1A	CACNA1C	CSNK1A1	CSNK1G3	DPT	ELN	FKTN	FGF7	GRIA1	GRIA3	HIF1A	HTR2B	ITIH3	IPO5	LGALS1	MYH2	2017-09-02	NFATC4	PRKG1	RAD23B	PRPH2	RYK	SGCD	SGCG	SIM1	TBX5	SLC35A2	WNT2	ZFPL1	SCAMP1	BAG2	PRDX6	SCRN1	RNF41	YAP1	SPTLC1	CORIN	FRS2	SPIN1	KDELR2	MAP4K5	XPOT	RRAS2	RAB11FIP2	TRIM32	MYOF
Fibroblasts_ENCODE_3	31	BMPR1A	DPT	ELN	FKTN	FGF7	GRIA3	HTR2B	ISLR	ITIH3	KRT19	MYH2	PRKG1	SGCD	SGCG	SIM1	SNTB2	TBX5	WNT2	BAG2	YAP1	CORIN	TRIM32	LMOD1	MYOF	TNFRSF12A	AMOTL2	ASPN	KIF26B	THAP10	HSPB6	DPY19L4
Fibroblasts_FANTOM_1	126	ADD1	ADH1B	ALDH9A1	ANXA11	ARF4	ARHGAP6	C7	CACNA1C	CAMLG	CIRBP	CSF1	CYBA	DPT	DUT	FGF7	FMO2	FTL	GARS	GOLGA1	GSTM5	HEXA	HIC1	HPS1	HTR2B	IDUA	ISLR	JAK3	IPO5	LTBR	LTC4S	SMAD5	MGMT	MGST3	MMP17	MMP19	NFATC4	NFE2L2	P4HB	PDE4A	PFDN5	PGK1	PIK3R2	PRKG2	MASP1	PTGIR	RASA2	RNF4	RNH1
Fibroblasts_FANTOM_2	17	CAMLG	FTL	GSTM5	ISLR	JAK3	MMP19	NFATC4	PRKG2	PTGIR	S1PR2	HAND2	ZNF771	GPR137	KIAA1614	SPAG16	SVEP1	C6orf120
Fibroblasts_FANTOM_3	43	ADH1B	ARHGAP6	C7	DPT	FGF7	FMO2	FTL	HIC1	HTR2B	ISLR	JAK3	MGMT	MIF	MMP17	MMP19	POLR2E	PRKG2	MASP1	PTGIR	ROM1	MRPL12	TBX5	TCF21	TNXB	COL14A1	GDF5	WISP1	S1PR2	HAND2	PRDX4	KDELR1	EMILIN1	ABCA6	ASPN	C19orf24	ADI1	GPR137	KIAA1614	PODNL1	ADM2	SVEP1	ZNF358	SIX5
Fibroblasts_HPCA_1	34	ADH1B	C7	CACNA1C	CAMLG	FTL	HEXA	IDUA	ISLR	JAK3	IPO5	MGST3	NFATC4	NFE2L2	PRKG2	MASP1	PTGIR	RNH1	TBX5	TCF21	TFDP1	HAND2	BAG2	PRDX4	MTHFD2	XPOT	CSTF2T	ZNF771	ADI1	FBXL8	PCDHGA11	GPR137	KIAA1614	PAPPA2	C7orf25
Fibroblasts_HPCA_2	61	ADH1B	ANXA11	ARF4	C7	CACNA1C	CAMLG	FTL	GOLGA1	HEXA	IDUA	ISLR	JAK3	IPO5	LTBR	SMAD5	MGST3	NFATC4	NFE2L2	PFDN5	PRKG2	MASP1	PTGIR	RNH1	TADA2A	TBX5	TCF21	TFDP1	VIM	CGGBP1	HAND2	BAG2	HDAC5	PRDX4	MTHFD2	KDELR1	TMEM115	XPOT	CSTF2T	DNPEP	MKRN2	TOR1AIP1	ZCCHC4	RASL12	ZNF771	ADI1	FBXL8	PCDHGA11	GPR137
Fibroblasts_HPCA_3	126	ADD1	ADH1B	ALDH9A1	ANXA11	ARF4	ARHGAP6	C7	CACNA1C	CAMLG	CIRBP	CSF1	CYBA	DPT	DUT	FGF7	FMO2	FTL	GARS	GOLGA1	GSTM5	HEXA	HIC1	HPS1	HTR2B	IDUA	ISLR	JAK3	IPO5	LTBR	LTC4S	SMAD5	MGMT	MGST3	MMP17	MMP19	NFATC4	NFE2L2	P4HB	PDE4A	PFDN5	PGK1	PIK3R2	PRKG2	MASP1	PTGIR	RASA2	RNF4	RNH1
GMP_BLUEPRINT_1	71	ARHGAP6	ATP5J	CD5L	MS4A3	CDH9	CPA3	CRHBP	CRYGD	CTSG	DNTT	FLT3	GABPA	LPAR4	H2AFZ	HDC	HMGB2	HNRNPA1	ITGA9	KCNJ14	LDHB	MPO	MTIF2	HNRNPM	NPM1	SERPINB10	PNN	PRG2	PRKG2	PSMA4	RAG2	RNASE2	RNASE3	RPL5	RYR3	SELP	STIL	SRP9	SSB	STXBP3	TEC	TOP2B	TRH	UBB	UMPS	VPREB1	XPO1	DEK	NCOA4
GMP_BLUEPRINT_2	96	APLNR	ARHGAP6	ATP5J	CD5L	MS4A3	CDH9	CPA3	CRHBP	CRYGD	CTSG	DHX9	DNTT	EIF4E	ELANE	EWSR1	FOXI1	FLT3	GABPA	GLRA2	LPAR4	GUCY2D	H2AFZ	HDC	HMGB2	HNRNPA1	HNRNPD	ITGA9	KARS	KCNJ14	KPNA2	LDHB	MC4R	MPO	MTIF2	HNRNPM	NDUFC2	NPM1	SERPINB10	PNN	PRG2	PRKG2	PSMA4	RAG2	RNASE2	RNASE3	RPL5	RPL15	RYR3
GMP_BLUEPRINT_3	59	ATP5J	CD5L	MS4A3	CDH9	CPA3	CRHBP	CRYGD	CTSG	DNTT	FOXI1	FLT3	LPAR4	H2AFZ	HDC	HMGB2	HNRNPA1	LDHB	MPO	MTIF2	HNRNPM	NPM1	SERPINB10	PNN	PRG2	PSMA4	RAG2	RNASE2	RNASE3	RPL5	RPL15	RYR3	STIL	SRP9	SSB	TEC	TOP2B	TRH	UBB	UMPS	VPREB1	DEK	TTF2	UBA3	UBA2	ARPP21	MRPL3	PARK7	CBX3
GMP_HPCA_1	72	ALOX12	CD33	CEACAM4	CTSG	DNTT	ERCC3	GPR3	GSTM5	H3F3B	HNRNPA2B1	INSL3	KARS	KCNJ14	LPO	MPO	NCL	OMD	PARK2	SERPINI2	POU2F1	PRTN3	PEX2	SLC5A5	SUPV3L1	SUV39H1	TRH	DNAJC7	VPREB1	ZNF35	ZNF207	LUZP1	SLC25A14	TRIP11	CNOT8	NCOR1	PUM1	BMS1	SMG7	ARPP21	CLP1	GLMN	LAMB4	GPATCH8	WDR43	RPRD2	GTPBP4	ZNF593	CDK5RAP1
GMP_HPCA_2	14	CEACAM8	CLC	CSF1R	DEFA4	FEN1	LPAR4	MEFV	CXCL9	MPO	CFP	PRG2	RNASE2	CLEC1B	ZNF710
GMP_HPCA_3	110	CCNT2	CD33	CHD4	AP2M1	DDOST	DHX9	DNMT1	ENO1	ERCC3	FLT3	GAS8	GGCX	GPR3	H3F3B	HNRNPA1	HNRNPA2B1	HNRNPH3	IK	IL3RA	IMPDH2	INSL3	KARS	KCNJ14	IPO5	LPO	MPO	MTIF2	NCL	OMD	PAFAH1B2	SERPINI2	POU2F1	PRTN3	RFC1	SLC5A5	SUPV3L1	SUV39H1	TCP1	NR2C1	TRH	DNAJC7	UBE2G2	ZNF35	ZNF207	LUZP1	ARID1A	TTF2	EIF3A
GMP_NOVERSHTERN_1	8	CLC	CPA3	CRHBP	DNTT	FLT3	MPO	PRG2	RNASE2
GMP_NOVERSHTERN_2	8	CLC	CPA3	CRHBP	DNTT	FLT3	MPO	PRG2	RNASE2
GMP_NOVERSHTERN_3	8	CLC	CPA3	CRHBP	DNTT	FLT3	MPO	PRG2	RNASE2
Hepatocytes_FANTOM_1	192	ABAT	ACADL	ADH1A	ADH6	AFM	AGT	AGXT	AHSG	ALB	ALDOB	AMBP	ANPEP	AOX1	APCS	APOA1	APOA2	APOC1	APOC3	APOE	APOH	ARSE	ASGR1	SERPINC1	BAAT	BHMT	SERPING1	C1R	C1S	C2	C4BPA	C4BPB	C5	C8A	C8B	C8G	C9	SERPINA6	CD14	CDO1	AKR1C4	ABCC2	CPB2	CPN2	CPS1	CYP2C19	CYP2C8	CYP2C9	CYP2E1
Hepatocytes_FANTOM_2	167	ABAT	ADH1A	ADH1C	ADH6	AFM	AGT	AGXT	AHSG	ALB	ALDH1A1	ALDOB	AMBP	ANPEP	AOX1	APCS	APOA1	APOA2	APOC1	APOC3	APOE	APOH	ARSE	ASGR1	SERPINC1	BAAT	BHMT	SERPING1	C1R	C1S	C4BPA	C4BPB	C5	C8A	C8B	C8G	C9	SERPINA6	CDO1	AKR1C4	CPB2	CPS1	CRYM	CYP2C8	CYP2C9	CYP2E1	CYP3A4	CYP3A5	CYP7A1
Hepatocytes_FANTOM_3	161	ACADL	ADH1A	ADH6	AFM	AGT	AGXT	AHSG	ALB	ALDOB	AMBP	ANPEP	AOX1	APCS	APOA1	APOA2	APOC1	APOC3	APOE	APOH	ARSE	ASGR1	SERPINC1	BAAT	BHMT	SERPING1	C1R	C1S	C2	C4BPA	C4BPB	C5	C8A	C8G	C9	SERPINA6	CDO1	AKR1C4	ABCC2	CPB2	CPS1	CYP2C8	CYP2C9	CYP2E1	CYP3A4	CYP3A5	DIO1	DPYS	EHHADH
Hepatocytes_HPCA_1	158	AADAC	ACADS	ACAT1	ADH1A	ADH1B	ADH1C	AFM	AHSG	ALDH2	ALDH3A2	AMBP	APOF	APCS	APOA1	APOA2	APOC3	APOE	ARG1	SERPINC1	BCHE	CEACAM1	BHMT	SERPING1	C1R	C4BPA	C5	C6	C8A	C8B	C8G	SERPINA6	CDO1	CEBPA	AKR1C4	CPB2	CPN2	CRP	CYB5A	CYP2A6	CYP2A7	CYP2C8	CYP2C9	CYP2J2	CYP3A5	DDC	DEFB1	DIO1	DPYS
Hepatocytes_HPCA_2	185	AADAC	ACAT1	ADH1A	ADH1C	AFM	AGT	AHSG	ALDH2	AMBP	APOF	APCS	APOA1	APOA2	APOB	APOC3	APOE	APOH	ASGR2	BAAT	BDH1	CFB	BHMT	SERPING1	C2	C4BPA	C4BPB	C5	C6	C8A	C8B	C8G	CAT	SERPINA6	ENTPD5	CEBPA	AKR1C4	CPB2	CPN2	CTSO	CYP2A6	CYP2B6	CYP2C8	CYP2C9	CYP2J2	CYP3A5	DAO	DDC	DIO1
Hepatocytes_HPCA_3	147	AADAC	ACAT1	ADH1A	ADH1B	ADH1C	AFM	AHSG	ALDH2	ALDH3A2	AMBP	APOF	APCS	APOA1	APOA2	APOC3	APOE	ARG1	SERPINC1	CEACAM1	BHMT	SERPING1	C1R	C4BPA	C5	C6	C8A	C8B	C8G	SERPINA6	CDO1	CEBPA	AKR1C4	CPB2	CPN2	CRP	CYB5A	CYP2A6	CYP2A7	CYP2C8	CYP2C9	CYP2J2	CYP3A5	DDC	DEFB1	DIO1	DPYS	EHHADH	ELF3
HSC_BLUEPRINT_1	8	CD34	CRHBP	ERG	GSTM5	PLS3	MMRN1	LAPTM4B	FAM124B
HSC_BLUEPRINT_2	20	CD34	CRHBP	ERG	FLT3	GSTM5	PLS3	SLC4A1	SCARF1	ZMYM3	MMRN1	XPO7	EXD2	LAPTM4B	KLHL9	LSM2	CCDC121	FAM124B	ATP8B4	TCEAL4	MYCT1
HSC_BLUEPRINT_3	20	ALAS2	CA1	CD34	CRHBP	ERG	FLT3	GSTM5	GYPA	GYPE	PLS3	SLC4A1	SCARF1	MMRN1	AHSP	EXD2	LAPTM4B	KLHL9	FAM124B	ATP8B4	TCEAL4
HSC_FANTOM_1	16	CRHBP	CRYGD	ELN	ERG	KCNJ13	MPL	PDE6G	PLA2G1B	SYPL1	ZNF3	RNF7	LECT1	CTNNA3	PHF20	EMCN	MYCT1
HSC_FANTOM_2	8	CRHBP	ELN	GSTM5	PLA2G1B	SYPL1	LECT1	CTNNA3	EMCN
HSC_FANTOM_3	8	CRHBP	ELN	GSTM5	SYPL1	CLEC3B	LECT1	CTNNA3	EMCN
HSC_NOVERSHTERN_1	9	CRHBP	ELN	GSTM5	PDE6G	SYPL1	LECT1	CTNNA3	EMCN	VN1R1
HSC_NOVERSHTERN_2	8	CRHBP	ELN	GSTM5	SYPL1	CLEC3B	LECT1	CTNNA3	EMCN
HSC_NOVERSHTERN_3	9	CRHBP	CRYGD	ELN	PDE6G	SYPL1	LECT1	CTNNA3	PHF20	EMCN
iDC_HPCA_1	11	ALOX15	F13A1	FCER2	IL3RA	CCL13	CCL17	CCL18	CCL23	CCL24	ALDH1A2	CD209
iDC_HPCA_2	10	ALOX15	CD86	FCER2	IL3RA	CCL13	CCL17	CCL24	ALDH1A2	CLEC10A	SPINT2
iDC_HPCA_3	8	ALOX15	F13A1	CCL13	CCL17	CCL18	CCL23	CCL24	CD209
Keratinocytes_ENCODE_1	26	CALML3	CSTA	DSG3	F3	GJB5	SFN	IL1A	JAG2	KRT5	KRT6B	LAD1	PI3	SERPINB5	SOX15	SULT2B1	LY6D	FGFBP1	AP1M2	FST	HES2	TMEM40	RAB25	S100A14	MMP28	ZBED2	KRT6C
Keratinocytes_ENCODE_2	18	CALML3	CSTA	DSG3	GJB5	SFN	IL1A	KRT6B	PI3	SOX15	FGFBP1	AP1M2	FST	HES2	TMEM40	RAB25	S100A14	ZBED2	KRT6C
Keratinocytes_ENCODE_3	10	DSG3	GJB5	SFN	IL1A	KRT6B	SOX15	FGFBP1	AP1M2	TMEM40	S100A14
Keratinocytes_FANTOM_1	98	ADAM8	AIM1	ALDH1A3	CALML3	CDH3	COL17A1	CSTA	CYP27B1	DSC3	DSG3	EPHA1	EREG	F3	FAT2	FGFR3	GJB3	GJB5	GNA15	SFN	CXCL3	IL1A	IL1B	ITGA6	ITGB4	ITGB6	JAG2	KCNJ15	KRT5	KRT6A	KRT6B	KRT14	KRT16	KRT17	LAD1	LAMA3	LAMB3	LAMC2	MMP9	NGFR	SERPINB2	PGF	SERPINB5	PKP1	FXYD3	PPL	PRSS8	PTHLH	S100A2
Keratinocytes_FANTOM_2	63	ADAM8	COL17A1	CSTA	CYP27B1	DSC3	DSG3	EREG	FAT2	GJB3	GJB5	GNA15	SFN	IL1A	IL1B	ITGB4	KRT5	KRT6A	KRT6B	KRT14	KRT16	KRT17	LAD1	LAMA3	LAMB3	MMP9	SERPINB5	PKP1	FXYD3	PRSS8	S100A2	S100A8	S100A9	SOX15	ST14	TP63	ARTN	CLCA2	PLCH2	FGFBP1	SH2D3A	AP1M2	MPZL2	FST	PPP1R13L	PKP3	KLK8	CBLC	TRIM29
Keratinocytes_FANTOM_3	65	ADAM8	CALML3	COL17A1	CSTA	CYP27B1	DSC3	DSG3	EREG	FAT2	GJB3	GJB5	GNA15	SFN	IL1A	IL1B	ITGB4	KRT5	KRT6A	KRT6B	KRT14	KRT16	KRT17	LAD1	LAMA3	LAMB3	LAMC2	MMP9	SERPINB5	PKP1	FXYD3	PRSS8	S100A2	S100A8	S100A9	SOX15	ST14	TP63	ARTN	CLCA2	PLCH2	FGFBP1	SH2D3A	AP1M2	MPZL2	FST	PPP1R13L	PKP3	KLK8
Keratinocytes_HPCA_1	18	DSG3	IL1A	KRT5	KRT14	SERPINB5	PTK6	SULT2B1	LY6D	CLCA2	FGFBP1	PRMT5	PKP3	FLRT3	TP53AIP1	DLK2	MMP28	GJB4	KRT6C
Keratinocytes_HPCA_2	53	BDKRB2	CALML3	CSTA	DSC3	DSG3	F3	GJB3	GJB5	SFN	IL1A	IRF6	JAG2	KRT5	KRT6B	KRT14	LAD1	PGF	PI3	SERPINB5	PKP1	PLA2G4A	PRSS8	PTK6	SLC6A11	SLC12A4	SOX15	SULT2B1	CORO2A	LY6D	CLCA2	FGFBP1	AP1M2	CNKSR1	B3GNT3	PRMT5	FST	DUSP14	LPAR3	FLRT3	TFCP2L1	HES2	TMEM40	FGD6	LTB4R2	RAB25	S100A14	DLK2	C1orf116
Keratinocytes_HPCA_3	46	BDKRB2	CALML3	CSTA	DSC3	DSG3	F3	GJB3	GJB5	SFN	IL1A	IRF6	JAG2	KRT5	KRT6B	KRT14	LAD1	MST1R	PI3	SERPINB5	PKP1	PTK6	SOX15	SULT2B1	CORO2A	LY6D	CLCA2	FGFBP1	AP1M2	CNKSR1	B3GNT3	PRMT5	FST	LPAR3	TFCP2L1	HES2	TMEM40	FGD6	LTB4R2	RAB25	S100A14	C1orf116	MMP28	ZBED2	ZNF750	GJB4	KRT6C
ly Endothelial cells_FANTOM_1	8	FLT4	HYAL2	CLEC1A	SOX18	ROBO4	CXorf36	MYCT1	KANK3
ly Endothelial cells_FANTOM_2	41	ACVRL1	ANGPT2	RHOC	BMX	CETP	ERG	FLT4	FUS	GPR4	KDR	MYL2	NOTCH4	RALA	MAPK12	TEK	TIE1	CLDN5	HYAL2	TNFSF18	KALRN	FEZ2	SEMA6B	LYVE1	ARHGEF15	MMRN1	CD93	N4BP3	CLEC1A	EMCN	SOX18	ROBO4	RASIP1	TMEM39B	POMGNT1	MRPL17	CXorf36	MMRN2	MYCT1	NETO2	PLVAP	KANK3
ly Endothelial cells_FANTOM_3	13	ANGPT2	FLT4	MAPK12	TEK	HYAL2	KALRN	FEZ2	CLEC1A	SOX18	ROBO4	CXorf36	MYCT1	KANK3
ly Endothelial cells_HPCA_1	12	GJA4	SELE	TIE1	CLDN5	VWF	HYAL2	TNFSF18	ARHGEF15	CLEC1A	ROBO4	MMRN2	KANK3
ly Endothelial cells_HPCA_2	9	GJA4	SELE	TIE1	CLDN5	VWF	TNFSF18	ROBO4	MMRN2	KANK3
ly Endothelial cells_HPCA_3	14	FLT4	GJA4	SELE	TIE1	CLDN5	TPM3	VWF	HYAL2	TNFSF18	ARHGEF15	CLEC1A	ROBO4	MMRN2	KANK3
Macrophages M1_BLUEPRINT_1	10	ACP2	ABCD1	C1QA	FDX1	CCL22	CD163	SCAMP2	ADAMDEC1	ARL8B	HAMP
Macrophages M1_BLUEPRINT_2	9	ACP2	ABCD1	FDX1	CCL8	CCL22	CD163	ADAMDEC1	TREM2	HAMP
Macrophages M1_BLUEPRINT_3	106	ACP2	ADRA2B	ALCAM	ABCD1	ATOX1	ATP6V0C	ATP6V1E1	BLVRA	C1QA	CD48	CD63	CLCN7	TPP1	CLTC	CCR1	CMKLR1	SLC31A1	COX5B	FCER1G	FDX1	FOLR2	FPR3	FTL	HEXB	HK3	IL10	IL12B	ITGAE	LAIR1	CXCL9	MMP19	NARS	NDUFS2	P2RX7	PDCL	MAPK13	PTGIR	PTPRA	RELA	CCL7	CCL8	CCL19	CCL22	SRC	STX4	TCEB1	TFRC	AGPS
Macrophages M1_FANTOM_1	55	ACP2	ADRA2B	ALCAM	TSPO	C3AR1	DAGLA	CALR	CHIT1	CYBB	CYC1	CYP19A1	DLAT	FCER1G	GP1BA	GPD1	IFNAR1	IL10	KCNJ5	KIFC3	MT2A	MYBPH	MYH11	MYO7A	P2RX7	PRDX1	RAB3IL1	RNH1	MRPL12	CCL1	CCL7	CCL8	CCL24	SRC	VIM	RRP1	MARCO	S1PR2	AP1M2	ACTR3	LILRB1	AFG3L2	SDS	LILRB4	EMILIN1	VSIG4	HSPB7	COQ2	ADAMDEC1
Macrophages M1_FANTOM_2	89	ACP2	ADCY3	ADRA2B	ALCAM	TSPO	C1QA	C1QB	C3AR1	DAGLA	CD63	CHIT1	CMKLR1	SLC31A1	CSF1	CSF1R	CYBB	CYC1	CYP19A1	FANCE	FCER1G	FDX1	FPR3	FTL	GP1BA	GPD1	HEXB	IL10	KCNJ1	KCNJ5	KIFC3	LAMP1	MMP19	MSR1	MT2A	MYBPH	MYO7A	P2RX7	PRDX1	RAB3IL1	MRPL12	CCL1	CCL7	CCL8	CCL18	CCL19	CCL24	SLC6A12	SPR
Macrophages M1_FANTOM_3	82	ACP2	ADCY3	ADRA2B	ALCAM	ABCD1	ANXA2	ATP6V1A	C1QA	C1QB	C3AR1	DAGLA	CD80	CD63	CHIT1	CMKLR1	SLC31A1	CSF1	CSF1R	CYBB	CYC1	CYP19A1	FANCE	FDX1	FPR2	FPR3	GPD1	HEXB	KCNJ1	KCNJ5	KIFC3	MMP19	MSR1	MT2A	MYBPH	P2RX7	MAPK13	S100A11	CCL1	CCL7	CCL8	CCL18	CCL19	CCL22	CCL24	SLC1A2	SLC6A12	SLC11A1	SIGLEC1
Macrophages M2_BLUEPRINT_1	96	ACP2	ADCY3	ABCD1	ALK	ARSB	ATP2A2	ATP6V1C1	ATP6V0A1	TSPO	CAMP	CANX	CD63	CD81	CLCN7	TPP1	SLC31A1	FDX1	FGR	FTL	GLB1	HADHB	NCKAP1L	HEXA	HEXB	HPS1	IFNAR1	ITGAX	KCNJ5	LAIR1	LAMP1	MSR1	MYO9B	P2RX7	SDCBP	SNX1	SNX2	STX4	MARCO	CDS2	PABPC4	ATP6V0D1	PICK1	ARHGEF11	HS3ST2	PDCD6IP	SCAMP2	COL4A3BP	HSPH1
Macrophages M2_BLUEPRINT_2	10	CLCN7	FGR	GLB1	HEXA	HEXB	HS3ST2	FKBP15	PQLC2	TMEM70	SLC38A7
Macrophages M2_BLUEPRINT_3	38	ACP2	ALK	ARSB	ATP6V0A1	CD63	CLCN7	TPP1	SLC31A1	FGR	GLB1	HADHB	NCKAP1L	HEXA	HEXB	IFNAR1	KCNJ5	MYO9B	P2RX7	SDCBP	MARCO	ATP6V0D1	HS3ST2	PDCD6IP	COL4A3BP	CYFIP1	PLEKHM2	FKBP15	SMG5	SLC39A1	COMMD9	MS4A4A	STX18	PQLC2	TMEM70	SLC38A7	VPS53	HAMP	LONRF3
Macrophages M2_HPCA_1	75	ADRA2B	AP1B1	ALDH9A1	ANXA11	AQP8	CD52	ELK1	FH	FLT1	GPD1	NCKAP1L	HEXB	KCNJ1	LAMP1	MMP19	MSR1	NDUFB1	NPR1	PDE1B	PEX19	S100A6	SLC6A7	SLC6A12	SNAPC2	SNX1	TAF10	UCP3	UGP2	USF2	XPNPEP2	AKR7A2	SNX3	TNFSF14	NFS1	GSTO1	KIAA0196	HS3ST2	BCAP31	CEPT1	BAIAP2	SLC9A6	VTI1B	ARFGEF2	HSPH1	LILRA2	EFR3A	FKBP15	NCAPH
Macrophages M2_HPCA_2	15	ADRA2B	DNASE1L3	FDX1	GPD1	GUCA1A	KCNJ1	MSR1	PDE1B	UCP3	HS3ST2	SDS	MS4A4A	TREM2	DNASE2B	MYOZ1
Macrophages M2_HPCA_3	8	ADRA2B	CD52	GPD1	MSR1	NPR1	UCP3	HS3ST2	MYO15A
Macrophages_BLUEPRINT_1	69	ACP2	ATOX1	ATP6V0C	ATP6V1E1	C1QA	CD9	CD48	CLCN7	CCR1	CRYBB1	CYBB	FCER1G	FDX1	FOLR2	FPR3	FTL	HEXA	HEXB	KCNJ5	LAIR1	M6PR	MDH1	NUBP1	P2RX7	RAC1	CCL8	CCL22	STX4	TCEB1	TYROBP	VAMP8	MARCO	CD84	ATP6V0E1	ATP6V1F	CD163	CIAO1	LY86	ARHGEF11	HS3ST2	ARPC4	ATP6AP2	BAIAP2	PRDX3	ERP29	LILRB5	SDS	LILRB4
Macrophages_BLUEPRINT_2	111	ACP2	ATOX1	ATP6V0C	ATP6V1E1	C1QA	CD9	CD48	CD63	CLCN7	TPP1	CCR1	CMKLR1	SLC31A1	COX5B	COX7B	COX8A	CRYBB1	CYBA	CYBB	FCER1G	FDX1	FOLR2	FPR3	FTL	GLB1	HEXA	HEXB	KCNJ5	LAIR1	LAMP1	NUBP1	NDUFB3	NDUFS3	NDUFS6	P2RX7	PCMT1	MAPK13	PSME1	RB1	CCL8	CCL22	SDHD	SUMO3	SNX2	TCEB1	TYROBP	UQCRC2	VAMP8
Macrophages_BLUEPRINT_3	85	ACP2	ATOX1	ATP6V0C	ATP6V1E1	C1QA	CD9	CD48	CD63	CLCN7	CCR1	COX8A	CRYBB1	CYBB	FCER1G	FDX1	FOLR2	FPR3	FTL	HEXA	HEXB	KCNJ5	LAIR1	LAMP1	NDUFB3	NDUFS6	P2RX7	MAPK13	CCL8	CCL22	SNX2	TCEB1	TYROBP	UQCRC2	VAMP8	MARCO	SNX3	CD84	ATP6V0E1	ITGB1BP1	ATP6V1F	CD163	COX5A	CIAO1	LY86	ARHGEF11	HS3ST2	SCAMP2	ARPC4
Macrophages_FANTOM_1	17	ACP2	CHIT1	CSF1	CYP19A1	FDX1	HK3	MSR1	CCL22	SLC6A12	CD84	SDS	VSIG4	CLEC5A	ADAMDEC1	HAMP	DNASE2B	MYOZ1
Macrophages_FANTOM_2	35	ACP2	ADCY3	ALCAM	ABCD1	BPI	CHIT1	CYP19A1	HK3	KCNJ1	KCNMB1	CXCL9	MMP8	MSR1	CCL1	CCL7	CCL22	SLC1A2	SLC6A12	CD84	CD163	SDS	LILRB4	VSIG4	FKBP15	NCAPH	CLEC5A	ADAMDEC1	ATP6V1H	PQLC2	SLAMF8	HAMP	DNASE2B	MYOZ1	LONRF3	MFSD7
Macrophages_FANTOM_3	57	ACP2	ADCY3	ALCAM	ABCD1	ATP6V1A	ATP6V0A1	BPI	CHIT1	SLC31A1	CSF1	CYBB	CYP19A1	FDX1	FGR	HK3	ITGAX	KCNJ1	KCNMB1	CXCL9	MMP8	MMP19	MSR1	P2RX7	MAPK13	CCL1	CCL7	CCL22	SLC1A2	SLC6A12	SLC11A1	STX4	NUMB	MARCO	CD164	CD84	CD163	CIR1	ARHGEF11	BCAP31	ATP6AP2	SDS	LILRB4	VSIG4	FKBP15	NCAPH	CLEC5A	ADAMDEC1	ATP6V1H
Macrophages_HPCA_1	123	ACADVL	ACP2	ARSB	ATP6V1A	ATP6V0C	ATP6V1C1	CD63	CETN2	CCR1	SLC31A1	COX5B	COX15	CYBB	DBI	ECHS1	FDX1	GRB2	HADHB	HEXA	HEXB	HK3	HMGCL	ITGAX	KIFC3	TNPO1	LAIR1	LAMP1	MGST3	MSR1	NARS	NDUFA8	NDUFB6	NDUFS8	PRDX1	PEX14	MAPK13	PSMD10	PTPN12	PEX19	QDPR	RAB1A	RAB5C	RALA	RENBP	CLIP1	CCL7	CCL18	SDHB
Macrophages_HPCA_2	78	ACP2	ARSB	ATP6V1A	ATP6V0C	ATP6V1C1	CD63	CETN2	CCR1	SLC31A1	COX5B	COX15	CYBB	DBI	ECHS1	FDX1	HEXB	LAIR1	LAMP1	MGST3	MSR1	NDUFA8	NDUFS8	PRDX1	MAPK13	PSMD10	PTPN12	PEX19	RAB1A	RALA	RENBP	CCL7	SDHB	STX4	TCEB1	MLX	TRAF3	NSMAF	AGPS	MARCO	ATP6V1F	GSTO1	BCAP31	IGSF6	TMEM147	VTI1B	LILRB4	EMILIN1	VSIG4
Macrophages_HPCA_3	114	ACADVL	ACP2	ARSB	ATP6V1A	ATP6V0C	ATP6V1C1	CD63	CETN2	CCR1	SLC31A1	COX5B	COX15	CYBB	DBI	ECHS1	FDX1	GRB2	HADHB	HCCS	HEXA	HEXB	HK3	HMGCL	ITGAX	TNPO1	LAIR1	LAMP1	MGST3	MSR1	NDUFA8	NDUFS8	PRDX1	MAPK13	PSMD10	PTPN12	PEX19	QDPR	RAB1A	RALA	RENBP	CLIP1	CCL7	SDHB	SRC	STX4	TCEB1	MLX	TRAF3
Macrophages_IRIS_1	37	ACP2	ADCY3	ABCD1	ATP6V1A	CHIT1	CLCN7	TPP1	SLC31A1	COX5B	CYP19A1	FDX1	HEXA	HK3	KCNJ1	M6PR	MSR1	SLC6A12	CD164	CD84	LONP1	ATP6AP2	TGOLN2	SDS	LILRB4	VSIG4	FKBP15	CLEC5A	ADAMDEC1	ATP6V1H	STX18	PQLC2	DNASE2B	MYOZ1	SLC30A5	LONRF3	MFSD7	LDHAL6B
Macrophages_IRIS_2	79	ACP2	ADCY3	ALCAM	ABCD1	ARSB	ATOX1	ATP6V1A	ATP6V0C	ATP6V1E1	ATP6V0A1	BPI	TSPO	CD63	CHIT1	CLCN7	TPP1	SLC31A1	COX5B	CSF1	CYBB	CYP19A1	FDX1	HTT	HEXA	HK3	ITGAX	KCNJ1	LAMP1	M6PR	MMP19	MSR1	MTHFR	P2RX7	MAPK13	PTPRA	RABGGTA	SLC1A2	SLC6A12	STX4	TCEB1	NUMB	CD164	CD84	LONP1	CPNE6	CIR1	TTLL4	ARHGEF11
Macrophages_IRIS_3	17	ACP2	CHIT1	CSF1	CYP19A1	FDX1	HK3	MSR1	CCL22	SLC6A12	CD84	SDS	VSIG4	CLEC5A	ADAMDEC1	HAMP	DNASE2B	MYOZ1
Mast cells_FANTOM_1	125	AMHR2	ANXA1	ANXA11	ATP6V1C1	BMPR1A	BTK	C3AR1	C8G	CASP10	CD22	CD33	SIGLEC6	CMA1	CPA3	CTSG	DIAPH1	DR1	MS4A2	GATA1	HDC	IL5	IL5RA	ITGA2B	KCNJ5	KRT1	LCP2	LTC4S	LYL1	MTR	NTRK1	OSBP	P2RX1	PAK2	PDE4A	PIK3R2	POLR2A	PPP3R1	PRG2	PRKAR1A	PTGDR	PTGER3	RAD23B	RENBP	RGS13	RXRB	SLC18A2	SNRNP70	SOS2
Mast cells_FANTOM_2	99	AMHR2	ANXA1	ANXA11	ATP6V1C1	BMPR1A	BTK	C3AR1	C8G	CASP10	CD22	SIGLEC6	CPA3	CTSG	DIAPH1	DR1	MS4A2	GATA1	HDC	IL5	ITGA2B	KCNJ5	KRT1	LCP2	LTC4S	LYL1	MTR	NTRK1	OSBP	P2RX1	PAK2	PIK3R2	POLR2A	PPP3R1	PRG2	PRKAR1A	PTGER3	RENBP	RGS13	RXRB	SLC18A2	SNRNP70	SYPL1	TADA2A	MAP3K7	TAL1	TEC	TPSAB1	RNF103
Mast cells_FANTOM_3	68	AMHR2	ANXA1	ANXA11	BMPR1A	BTK	C3AR1	C8G	CASP10	CD22	SIGLEC6	CPA3	CTSG	DIAPH1	MS4A2	GATA1	HDC	IL5	ITGA2B	KRT1	LTC4S	LYL1	NTRK1	OSBP	P2RX1	PAK2	PIK3R2	PRG2	PTGER3	RENBP	RGS13	RXRB	SLC18A2	SNRNP70	TADA2A	TAL1	TPSAB1	NDST2	AGPS	PABPC4	RGS11	USP10	WDR46	CTR9	DEPDC5	KLRG1	HSPH1	IFT27	ATXN2L
Megakaryocytes_BLUEPRINT_1	9	ARHGAP6	GP1BA	HTR2A	MPL	PF4V1	SELP	GP6	CLEC1B	RUFY1
Megakaryocytes_BLUEPRINT_2	9	ANXA3	ARHGAP6	GP1BA	MPL	PF4V1	SELP	NCKAP1	CLEC1B	TUBB1
Megakaryocytes_BLUEPRINT_3	8	ANXA3	ARHGAP6	GP1BA	MPL	SELP	CLEC1B	LRP2BP	TUBB1
Megakaryocytes_NOVERSHTERN_1	9	GP1BA	HBD	PF4V1	SELP	VWF	KALRN	RGS6	GP6	CLEC1B
Megakaryocytes_NOVERSHTERN_2	10	GP1BA	HBD	PF4V1	SELP	VWF	KALRN	RGS6	GP6	CLEC1B	TUBB1
Megakaryocytes_NOVERSHTERN_3	8	GP1BA	PF4V1	SELP	VWF	KALRN	RGS6	GP6	CLEC1B
Melanocytes_ENCODE_1	15	CA8	MLANA	GJA3	OCA2	S100B	SOX10	GPR137B	TYR	KCNAB2	PIR	FARP2	KCNE4	QPCT	SLC45A2	TBC1D16
Melanocytes_ENCODE_2	23	CA8	CDH3	MLANA	GJA3	MMP17	OCA2	CLEC11A	SOX10	GPR137B	TYR	TYRP1	KCNAB2	PIR	TNFRSF14	FARP2	QPCT	SLC45A2	WIPI1	MCOLN1	WFDC1	APH1B	UAP1L1	TBC1D16
Melanocytes_ENCODE_3	12	CA8	CBR3	NOV	OCA2	SOX10	TYR	PIR	FARP2	QPCT	SLC45A2	UAP1L1	TBC1D16
Melanocytes_FANTOM_1	10	DCT	MLANA	TRPM1	OCA2	SOX10	TYR	TYRP1	SLC16A6	PLXNC1	SLC45A2
Melanocytes_FANTOM_2	157	ACACB	ACP5	ASPA	BCL2A1	CEACAM1	CAPN3	RUNX3	CDK2	LYST	CLCN5	ABCC2	CYP27A1	DAB2	DCT	EDNRB	ERBB3	ESR2	MLANA	IFI6	GCNT2	GJB1	GK	GMPR	GNAL	HLA-DRA	HLA-DRB1	HLA-F	IFI16	IFI27	IFI35	SP110	IFIT2	IFIT1	IFIT3	IRF4	ISG20	ITGB8	ITPKB	KCNJ13	KIT	L1CAM	MBP	MITF	TRPM1	MMP8	MX1	MX2	MYO5A
Melanocytes_FANTOM_3	200	ABL2	ACACB	ACP5	APOD	ASPA	BCL2A1	CEACAM1	CAPN3	RUNX3	CBR3	CD36	CDK2	LYST	CLCN5	CLCN7	ABCC2	CTSK	CYP27A1	DAB2	DCT	NQO1	EDNRB	ERBB3	ESR2	ETV5	ACSL3	MLANA	IFI6	GCNT2	GJB1	GK	GMPR	GNAL	HLA-DPA1	HLA-DRA	HLA-DRB1	HLA-F	IFI16	IFI27	IFI35	SP110	IFIT2	IFIT1	IFIT3	IRF4	IRF7	ISG20	ITGB8
Memory B-cells_BLUEPRINT_1	144	ACRV1	ADCY2	AQP8	ART1	TNFRSF17	BLK	C4BPA	S100G	CASQ2	CD1C	CD19	MS4A1	CD22	SIGLEC6	CD37	CD72	CD79A	CD79B	CETP	CHRM2	CHRNA2	CCR6	CNR2	COX6A2	CPA2	CPB1	CSN1S1	NCAN	CYLC2	CYP2A7	CYP2C19	DCC	DPP6	DSP	FMO1	FSHR	GABRA4	GAD2	GK2	GNAT2	GNRHR	GPX5	GRIN2B	GRM6	HCRTR2	HLA-DPB1	HSD3B2	HTN3
Memory B-cells_BLUEPRINT_2	67	TNFRSF17	BLK	CAPN3	CD19	MS4A1	CD22	CD37	CD72	CD79A	CD79B	CCR6	CNR2	CPA2	CPB1	CSN1S1	DPP6	DSP	FMO1	GK2	GRM6	HNRNPL	INHBC	KCNA5	CD180	MC4R	PAX5	PNOC	POU4F2	PRKCB	SLC17A1	SPIB	SYPL1	TSHB	ZIC3	ADAM21	LY86	SCRN1	KIAA0125	RRH	CCR9	CD3EAP	SP140	GGA2	TNFRSF13B	AIPL1	STAP1	VPREB3	WNT16
Memory B-cells_BLUEPRINT_3	70	ART1	BLK	S100G	CASQ2	CD1C	CD19	MS4A1	CD22	SIGLEC6	CD37	CD72	CD79A	CD79B	CHRM2	CCR6	CNR2	CPB1	CSN1S1	CYP2A7	FMO1	GABRA4	GAD2	GK2	GNAT2	GRM6	INHBC	KCNJ10	KRT2	CD180	MEFV	MAP3K9	NPY5R	PAX5	PNOC	PNLIPRP1	POU4F2	PRKCB	SELP	SPIB	TSHB	KALRN	CER1	LY86	KIAA0125	SSX3	RRH	CD3EAP	SP140
Memory B-cells_HPCA_1	19	BLK	CD19	MS4A1	CD22	CD79A	CD79B	GRM6	INHBC	PNOC	SPIB	TSHB	KIAA0125	CD3EAP	TNFRSF13B	TSPAN13	VPREB3	QRSL1	FCRL2	MOGAT2
Memory B-cells_HPCA_2	39	TNFRSF17	BLK	CD19	MS4A1	CD22	CD37	CD72	CD79A	CD79B	CSN1S1	DSP	FMO1	GK2	GRM6	INHBC	CD180	PNOC	POU4F2	PRKCB	SPIB	TSHB	LY86	KIAA0125	RRH	CCR9	CD3EAP	SP140	GGA2	TNFRSF13B	STAP1	VPREB3	QRSL1	HRH4	SLC5A7	FCRL2	ZNF548	SHISA6	FMO6P	ANKRD34C
Memory B-cells_HPCA_3	14	BLK	CD19	MS4A1	CD22	CD79A	CD79B	INHBC	PNOC	SPIB	KIAA0125	TSPAN13	VPREB3	QRSL1	FCRL2
Memory B-cells_IRIS_1	14	BLK	CD1C	CD79B	ODC1	SPIB	MBD4	LY86	SP140	TNFRSF13B	FSCN2	ZBTB32	NT5C	WNT16	TRMT61A
Memory B-cells_IRIS_2	19	BLK	CXCR5	CD19	MS4A1	CD22	CCR6	HTR3A	MGAT5	SPIB	RNGTT	MBD4	LY86	CXCL13	SP140	TNFRSF13B	ZBTB32	MIOS	AICDA	FCRL2
Memory B-cells_IRIS_3	12	BLK	CD1C	CD79B	ODC1	SPIB	MBD4	SP140	TNFRSF13B	FSCN2	ZBTB32	NT5C	WNT16
MEP_BLUEPRINT_1	14	AHCY	CDK4	CPA3	CRHBP	ERG	GSTM5	HDC	EPCAM	PRG2	RYR3	MINPP1	PAICS	HPGDS	LAPTM4B
MEP_BLUEPRINT_2	11	AHCY	CDK4	CPA3	CRHBP	GSTM5	HDC	EPCAM	POLE2	HPGDS	LAPTM4B	TCEAL4
MEP_BLUEPRINT_3	14	BUB1B	CPA3	CRHBP	ERG	HDC	POLE2	RYR3	STIL	KIAA0101	SNX5	HPGDS	MRPL15	C11orf95	FAM124B
MEP_HPCA_1	24	FXN	GATA1	HBD	KEL	MYL4	PCCB	PNMT	PRG2	RHAG	SURF2	TPSAB1	UNG	AIMP2	CHAF1B	RUVBL1	NAT6	ERAL1	HPGDS	MRPS2	CTNNBL1	EXOSC5	ACD	DCTPP1	MTG1
MEP_HPCA_2	27	FCER1A	FMO1	FXN	KRT1	NTRK1	PCCB	PNMT	UNG	IFRD2	AIMP2	CHAF1B	RUVBL1	MRPL28	TMED1	FBXO7	ERAL1	HPGDS	MECR	MRPS2	DDX41	CTNNBL1	C21orf59	EXOSC5	ACD	DCTPP1	NOL12	MTG1
MEP_HPCA_3	9	FXN	PCCB	PNMT	TMED1	HPGDS	MRPS2	CTNNBL1	ACD	NOL12
MEP_NOVERSHTERN_1	55	ATIC	BCS1L	CCT6A	DDX1	DDX10	FXN	HNRNPAB	ITGA2B	PCCB	POLE2	RYR3	IFRD2	RUVBL1	PSMG1	LDB1	VAPA	TXNL1	KEAP1	URB1	LRPPRC	TRAP1	PRMT3	NUDC	FASTKD2	PDCD11	MYO16	PPRC1	WDR43	MLC1	SERBP1	ERAL1	GNL3	NUFIP1	RPUSD2	RRP15	MRPS2	MRTO4	NOP16	MKS1	PAK1IP1	CDKN2AIP	TSR1	WDR12	CTNNBL1	BCCIP	GUF1	CARS2	FN3KRP
MEP_NOVERSHTERN_2	12	CA1	FMO1	FXN	HDC	NTRK1	PNMT	PRG2	HPGDS	MRPS2	COQ3	CTNNBL1	ACD
MEP_NOVERSHTERN_3	27	FCER1A	FMO1	FXN	KRT1	NTRK1	PCCB	PNMT	UNG	IFRD2	AIMP2	CHAF1B	RUVBL1	MRPL28	TMED1	FBXO7	ERAL1	HPGDS	MECR	MRPS2	DDX41	CTNNBL1	C21orf59	EXOSC5	ACD	DCTPP1	NOL12	MTG1
Mesangial cells_ENCODE_1	16	CDH6	CDKN1C	EDN2	FOXF1	FOXD1	HOXA11	HOXD1	LHX1	MICB	TLL2	DOC2B	PADI2	RHOF	KIRREL	CLSTN2	CRISPLD2
Mesangial cells_ENCODE_2	12	CDKN1C	EDN2	FOXD1	HOXA11	HOXD1	LHX1	MICB	TLL2	DOC2B	ARL4C	KIRREL	CLSTN2
Mesangial cells_ENCODE_3	71	CDH6	CDH16	CDKN1C	COL4A1	ARID3A	EDN2	EPHB2	FOXD1	GPI	HOXA3	HOXA11	HOXB2	HOXB3	HOXC10	HOXD1	HOXD11	ILK	INPP5A	ITGA3	ITGB3	LAMA5	LHX1	MICB	NME3	NTHL1	PAX2	PDCD2	PFDN1	PLEC	PVR	HNF1B	NR2F2	TLL2	UBA1	UCP2	UROD	WNT7B	PXDN	DOC2B	RNASET2	FGF18	CLDN6	DHRS3	HS3ST3A1	REC8	ARL4C	PROCR	PNPLA6
Mesangial cells_FANTOM_1	100	BGN	BST2	CD70	CNN1	COL1A1	COL3A1	COL4A1	COL5A1	COL6A3	CLDN4	VCAN	CTGF	DCN	DPYSL3	ELF3	SLC29A1	EPHB2	F2RL2	FGB	FOXC1	FOXD1	FLNC	FN1	GATA6	GLI2	SFN	HOXA5	HOXA7	HOXA10	HOXA11	HOXB2	HOXB3	HOXB6	HOXB9	HOXD11	IGFBP2	IGFBP4	IGFBP5	ITGB3	KCNJ15	LAD1	LAMA5	LHX1	LIF	SMAD6	MITF	MMP7	MYLK
Mesangial cells_FANTOM_2	29	CD70	F2RL2	FGB	FOXC2	HOXA3	HOXA7	HOXA10	HOXA11	HOXB8	HOXB9	HOXD10	HOXD11	PAX2	ABCB1	PODXL	RAB3B	SALL1	HNF1B	UCP2	PAX8	DOC2B	CLDN6	REC8	B3GALT5	IFITM2	NUP210	RHOF	C14orf105	CDHR1
Mesangial cells_FANTOM_3	169	ACTA2	ADORA1	AEBP1	ARHGAP4	ATP7B	BGN	BMP4	CD70	CDH6	CNN1	COL1A1	COL1A2	COL3A1	COL5A1	COL6A1	COL6A2	COL6A3	CLDN4	CLDN3	CRIP1	CYBA	DCN	DNM1	DPYSL3	EDN2	ELF3	ENPEP	SLC29A1	F2RL2	FGB	FOXC1	FOXD1	FOXC2	FN1	FZD2	GATA6	GLI2	CCR10	GRB14	HOXA3	HOXA4	HOXA6	HOXA7	HOXA10	HOXA11	HOXB6	HOXB8	HOXB9
Monocytes_BLUEPRINT_1	10	ASGR2	FCN1	CFP	RNASE2	CD300C	LILRA1	TLR7	MS4A6A	LILRA5	CCR2
Monocytes_BLUEPRINT_2	17	AIF1	ASGR2	CYBB	FCAR	FCN1	KCNMB1	MEFV	MNDA	CFP	S100A12	CD163	CD101	CLEC5A	FBXL5	TREM1	RETN	CCR2
Monocytes_BLUEPRINT_3	12	ASGR2	CSF3R	F13A1	FCN1	CFP	RNASE2	S100A12	LILRB2	CD93	PADI4	P2RY13	MS4A6A
Monocytes_FANTOM_1	80	AIF1	APAF1	RHOA	RHOG	ARNT	ASGR2	C3AR1	CASP5	TNFRSF8	CD33	CSF1R	CSF3R	CYBB	FCAR	FCN1	FPR2	HCK	HK3	HRH2	HSPA6	KCNMB1	MEFV	MAP3K3	MNDA	MYO1F	CFP	PHKG2	PTGIR	RARA	S100A12	TYROBP	UBE2D1	UPK3A	VASP	BEST1	LST1	NUP214	IQGAP1	ATP6V0D1	CD163	CD101	EIF4E2	CALCOCO2	LILRB2	TGOLN2	CAMKK2	LILRB1	CD300C
Monocytes_FANTOM_2	179	ABCB7	AIF1	ANXA1	ARF5	ASGR2	BPI	BTK	TSPO	C3AR1	CAPN2	CAPN3	CAPNS1	CAST	CD4	CD33	CEACAM4	MAPK14	CSF1R	CSF3R	CTBP2	CX3CR1	CYBB	DHX8	F13A1	FCAR	FCER1G	FCN1	FGR	FOLR2	FPR2	HADHA	HCK	HK3	AGFG1	HSPA6	CXCR2	IL10RA	IMPDH1	KCNMB1	LTBR	LYL1	MAN2C1	MARK3	MAP3K3	MAP3K11	MNDA	MNT	MYO1F
Monocytes_FANTOM_3	163	ABCB7	AIF1	ANXA1	ARF5	ASGR2	BPI	BTK	TSPO	C3AR1	CAPN2	CAPN3	CAPNS1	CAST	CD4	CD33	CEACAM4	MAPK14	CSF1R	CSF3R	CTBP2	CX3CR1	CYBB	DHX8	F13A1	FCAR	FCER1G	FCN1	FGR	FPR2	HCK	HK3	AGFG1	HSPA6	IL10RA	IMPDH1	KCNMB1	LTBR	LYL1	MAN2C1	MARK3	MAP3K3	MAP3K11	MNDA	MNT	MYO1F	CFP	PLP2	PPP1CB
Monocytes_HPCA_1	19	CSNK1A1	FCN1	FGR	HUS1	NUBP1	PNP	CFP	SH3BP2	SRC	LRRFIP1	LILRB2	EIF1B	FNDC3A	FKBP15	CLEC5A	RPS6KC1	CD244	ARL8B	RETN
Monocytes_HPCA_2	15	CASP5	CD48	CSNK1A1	FCN1	FGR	FPR2	MEFV	PNP	CFP	LILRA1	FKBP15	CLEC5A	SIGLEC9	ARL8B	RETN
Monocytes_HPCA_3	134	AP1G1	ASGR2	BNIP2	TSPO	CASP5	CD1E	TNFRSF8	CD33	CDK9	CSF1R	DDX3X	DHX8	DLG4	GPR183	ETF1	ETV3	EWSR1	FCAR	FCN1	FOLR2	FOLR3	FPR2	GALNT3	HIF1A	HNRNPU	AGFG1	KCNC3	KCNMB1	MEFV	MMP17	MTF1	MTHFR	OSM	PDE6H	CFP	PGGT1B	PLD2	PLEK	POU2F2	PPM1A	PRKACA	MAPK6	MAP2K1	PTGIR	RAB5A	RELA	CLIP1	S100A10
Monocytes_IRIS_1	18	ASGR2	TNFRSF8	FCAR	FCN1	FOLR2	HIC1	MEFV	CFP	S100A12	SLC11A1	FBXL5	VENTX	RABGEF1	TREM1	VNN3	SAMSN1	MS4A6A	LILRA5
Monocytes_IRIS_2	10	ASGR2	FCAR	FCN1	S100A12	UPK3A	VENTX	TREM1	VNN3	MS4A6A	LILRA5
Monocytes_IRIS_3	35	ASGR2	CASP5	TNFRSF8	FCAR	FCN1	FOLR2	HIC1	HIF1A	MEFV	MMP17	OSM	CFP	PTGIR	S100A12	SLC11A1	UPK3A	RIOK3	SOCS3	SEMA6B	GNA13	FGL2	STAB1	PADI4	CLEC5A	FBXL5	VENTX	RABGEF1	METTL9	P2RY13	TREM1	VNN3	DENND1A	SAMSN1	MS4A6A	LILRA5
Monocytes_NOVERSHTERN_1	91	AIF1	ANXA1	ASGR2	BPI	BTK	TSPO	C3AR1	CAPN3	CAST	CD4	CD33	CEACAM4	MAPK14	CSF3R	CTBP2	CX3CR1	CYBB	F13A1	FCAR	FCER1A	FCN1	FGR	FPR2	HCK	HK3	HSPA6	CXCR2	KCNMB1	LTBR	LYL1	MNDA	MYO1F	NCF4	CFP	PLP2	PTEN	RNASE2	S100A12	NEK4	CLEC3B	UBE2D1	LST1	NUP214	MARCO	DOK2	PSTPIP1	CD163	CD101
Monocytes_NOVERSHTERN_2	14	ASGR2	FCAR	FCN1	FOLR2	MEFV	CFP	S100A12	SLC11A1	UPK3A	FBXL5	VENTX	TREM1	VNN3	MS4A6A
Monocytes_NOVERSHTERN_3	13	ASGR2	FCAR	FCN1	FOLR2	MEFV	CFP	S100A12	SLC11A1	UPK3A	VENTX	TREM1	VNN3	MS4A6A
MPP_BLUEPRINT_1	46	ADCY3	CRHBP	ERG	CAPRIN1	P2RX1	SERPINI2	TEC	TIE1	UMPS	MLF2	ZNF282	NSMAF	USP6	MED7	H2AFY	PPM1F	PARP2	MRPS31	CALCOCO2	TMEM147	SF3A3	CSTF2T	LSM5	ATXN10	HIBCH	ATP2C1	ZNF219	TAOK3	PTRH2	TBC1D13	TMEM70	ATP5SL	WDR60	DPPA4	AGK	MKL2	BAHCC1	ALG8	CENPO	SPAG16	UBA5	SFXN3	FAM136A	G6PC3	HNRNPA3	DPY19L4
MPP_BLUEPRINT_2	80	ABO	AIF1	AMD1	ATP5J	AVP	BTF3	ERCC8	CLNS1A	CPA3	CRHBP	CRYGD	DNTT	DUT	FANCA	HINT1	IGLL1	EIF3E	ITGA9	LRCH4	MPL	MPO	NACA	NFYA	NPM1	NUP98	PIGF	PRTN3	PSMA2	PSMA6	RAG2	RBBP7	RFC2	RNASE2	RNASE3	RPS3	RPS24	SMARCC2	SNRPF	TEC	TERT	TRH	TSSC1	TTF1	ZNF32	ZNF35	ZNF134	CD164	GALR2
MPP_BLUEPRINT_3	62	ABO	AMD1	ATP5J	AVP	BTF3	ERCC8	CLNS1A	CRHBP	CRYGD	DUT	FANCA	HINT1	IGBP1	IGLL1	IMPDH2	EIF3E	ITGA9	LRCH4	MPL	MPO	NACA	NUP98	PIGF	PSMA2	PSMA6	RBBP7	RFC2	RNASE2	RPS3	RPS24	SNRPF	TERT	ZNF32	ZNF134	GALR2	MED7	TATDN2	KIAA0125	NUBP2	PPIH	AKAP13	ESYT1	HAUS5	INVS	LSM1	BZW2	RSL24D1	ZNF639
MPP_ENCODE_1	16	AVP	AZU1	CRHBP	DNTT	FLT3	IGLL1	ITGA9	MPL	MPO	NUP98	RNASE2	SPN	CD164	KIAA0125	LSM1	VPREB3
MPP_ENCODE_2	8	AVP	CRHBP	FLT3	IGLL1	MPL	MPO	KIAA0125	VPREB3
MPP_ENCODE_3	8	AVP	CRHBP	FLT3	IGLL1	MPL	MPO	KIAA0125	VPREB3
MPP_FANTOM_1	53	ABO	AVP	CD37	CD52	CPA3	CRHBP	CSF2RB	CSF3R	CTSW	FCER1A	FLT3	GATA1	HBB	HBD	HDC	HLA-DOA	IGLL1	ITGA2B	ITGA9	ITGAL	JAK3	CIITA	MPL	MPO	NKG7	OSM	P2RX1	PIK3CG	PLCB2	PRKCB	PRTN3	PTPN6	PTPN7	PTPRC	PTPRCAP	SELPLG	SPN	GFI1B	S1PR4	BAIAP3	ACAP1	KIAA0125	TSPAN32	IKZF1	KLF1	MLC1	CD244	DPPA4
MPP_FANTOM_2	59	ABO	AVP	FMNL1	CD37	CD52	CPA3	CRHBP	CSF2RB	CSF3R	CTSW	FCER1A	FLT3	GATA1	HBB	HBD	HDC	HLA-DOA	IGLL1	IRF5	ITGA2B	ITGA9	ITGAL	JAK3	CIITA	MPL	MPO	NKG7	OSM	P2RX1	PIK3CG	PLCB2	PRKCB	PRTN3	PTPN6	PTPN7	PTPRC	PTPRCAP	SELPLG	SPN	LST1	GFI1B	S1PR4	BAIAP3	ACAP1	KIAA0125	TSPAN32	IKZF1	KLF1
MPP_FANTOM_3	32	AVP	CD37	CD53	CPA3	CRHBP	CSF3R	CTSW	FCER1A	HBD	NCKAP1L	HLA-DOA	IGLL1	ITGA2B	LAIR1	MPO	MYO1F	NCF4	OSM	P2RX1	PTPN7	PTPRC	PTPRCAP	SPI1	SPN	GFI1B	S1PR4	KIAA0125	TSPAN32	IKZF1	MLC1	SASH3	AGAP2
MPP_NOVERSHTERN_1	10	AVP	CRHBP	FLT3	IGLL1	MPL	MPO	NUP98	KIAA0125	ESYT1	VPREB3
MPP_NOVERSHTERN_2	8	AVP	CRHBP	FLT3	IGLL1	MPL	MPO	KIAA0125	VPREB3
MPP_NOVERSHTERN_3	8	AVP	CRHBP	FLT3	IGLL1	MPL	MPO	KIAA0125	VPREB3
MSC_FANTOM_1	8	HTR7	MMP17	PLA2G5	CDKL5	PKD2L1	ADAMTS12	ZNRF4	CTRB2
MSC_FANTOM_2	11	HTR7	MMP17	PRB3	CCL21	CDKL5	TNP2	PKD2L1	ZNF408	ADAMTS12	ZNRF4	CTRB2
MSC_FANTOM_3	18	COL10A1	DVL1	HAS1	HTR7	MMP17	NPAS1	PLA2G5	PRB3	CDKL5	TNP2	WISP1	PKD2L1	TRIM3	COPS8	ADAMTS12	TSSK1B	ZNRF4	CTRB2
MSC_HPCA_1	36	DCTD	DDOST	EEF1D	KIF22	LAMP1	NDUFA8	PARN	POLR2G	SLC35A2	HAND2	EIF4E2	CUL7	SCAMP3	STUB1	TMEM147	YIF1A	RER1	EMILIN1	SNF8	CABIN1	MKRN2	SPCS1	TRMT112	ZNF446	PRX	MRPS11	CUEDC2	SPAG16	MRPL24	TBC1D17	NHEJ1	PODNL1	SF3B5	THAP3	SLC38A10	SIX5
MSC_HPCA_2	19	DCTD	EEF1D	KIF22	POLR2G	HAND2	EIF4E2	CUL7	SCAMP3	YIF1A	RER1	EMILIN1	CABIN1	TRMT112	PRX	MRPL24	NHEJ1	PODNL1	SF3B5	THAP3
MSC_HPCA_3	85	ATP6V1C1	CYC1	DCTD	DDOST	EEF1D	ERCC1	GSTM5	HIC1	IMPDH1	KIF22	LAMP1	MDH2	NDUFA8	NDUFB4	NFATC4	PARN	POLR2G	PTPN11	RPL8	RPN1	SLC35A2	AAAS	TMEM11	HAND2	EIF4E2	BAG3	RNF7	SNX17	CUL7	SCAMP3	RNF41	STUB1	TMEM147	TIMM44	VTI1B	YIF1A	KDELR1	LMAN2	RER1	EMILIN1	SNF8	COPZ1	HMGXB3	CLUAP1	IQSEC2	PMPCA	CABIN1	MKRN2
mv Endothelial cells_ENCODE_1	166	ACVRL1	ANGPT2	SLC25A6	RHOC	TSPO	CAV2	CCNG1	CD34	CETP	COX4I1	CSNK2A2	DYNC1LI2	ECHS1	FDPS	FLT4	GJA4	GOLGA3	GOT2	HADHA	HCFC1	HCRTR1	HOXD3	ILF2	ITGA9	KDR	LGALS1	NOTCH4	NOVA2	PLXNB3	MAPK3	PRPSAP1	PSMB7	PSMC5	PSMD8	RALA	RANGAP1	MAPK12	SELE	SH3GL1	SMARCD1	SMARCE1	SUMO3	SNAPC4	SNTB2	TARBP2	TBX1	TEK	TIE1
mv Endothelial cells_ENCODE_2	182	ACVRL1	ANGPT2	SLC25A6	RHOC	ATP1B3	BYSL	TSPO	CAV2	CD34	CDC27	CETP	CLIC1	COPA	COX4I1	CSNK2A2	DYNC1LI2	FDPS	FLT4	GDI2	GOT2	GYG1	HCFC1	HCRTR1	HOXD3	ILF2	KDR	LAMP1	LGALS1	MTHFR	MYL6	NAP1L4	NDUFC2	NOTCH4	NOVA2	PLD2	PLXNB3	POLR2F	MAPK3	PRPSAP1	PSMB7	PSMC5	ABCD4	RALA	RANGAP1	RPL4	RPN2	MAPK12	SELE
mv Endothelial cells_ENCODE_3	134	ACVRL1	ANGPT2	SLC25A6	RHOC	CAV2	CD34	CETP	COX4I1	CSNK2A2	DYNC1LI2	FDPS	FLT4	GJA4	GOLGA3	GOT2	HADHA	HCFC1	HCRTR1	HOXD3	ILF2	ITGA9	KDR	LGALS1	NOTCH4	NOVA2	PLXNB3	MAPK3	PRPSAP1	PSMB7	PSMC5	RALA	RANGAP1	MAPK12	SELE	SH3GL1	SMARCD1	SMARCE1	SUMO3	SNAPC4	SNTB2	TARBP2	TBX1	TEK	TIE1	CLDN5	TPM3	UFD1L	VWF
mv Endothelial cells_FANTOM_1	100	ACVRL1	ANGPT2	ART4	ARVCF	BMX	CALM1	CASP10	CAV1	CD9	CD34	ENTPD1	CDK9	CETP	CSF2RB	CTNNA1	ACE	ELK4	ERG	ERH	FLOT2	FLT1	FLT4	GABPB1	HDAC1	HOXD3	HTR1B	IL3RA	KDR	LYL1	MAP3K3	MGAT5	NCK1	NOTCH4	NOVA2	PNP	PDCL	PIK3CG	PLCG1	PRPSAP1	RALA	RALB	SELE	TAL1	TBX1	TEK	TIE1	CLDN5	UFD1L
mv Endothelial cells_FANTOM_2	59	ACVRL1	ANGPT2	ARVCF	BMX	CASP10	CAV1	CD9	CD34	ENTPD1	CETP	CSF2RB	ACE	ERG	FLT1	FLT4	HTR1B	IL3RA	KDR	LYL1	MAP3K3	NOTCH4	PNP	NPR1	TAL1	TBX1	TEK	TIE1	CLDN5	VWF	SCARF1	HYAL2	TNFSF18	TAOK2	PPM1F	RAMP3	SEMA6B	LYVE1	TFEC	ARHGEF15	MMRN1	CD93	ATF6	N4BP3	STAB1	CLEC1A	PCDH12	EMCN	SOX18
mv Endothelial cells_FANTOM_3	115	ACTG1	ADRA1B	ANXA2	ARF1	RHOA	RHOC	ATP2B3	BMX	PTTG1IP	CAV1	CCKAR	CD34	AP2M1	CLTA	CPA1	CTNNA1	DAD1	DLST	DYNC1H1	EIF4G1	FOXC2	GJA4	GPR4	HSPA4	HSP90AB1	MAGEB1	MIF	MIP	MYL6	2017-09-02	NEDD8	NOTCH4	OXA1L	P4HB	PLS3	POLR2J	PPP2R1A	PPP2R2A	MAPK3	PSMB7	PSMD1	PSMD10	RALA	RCN2	SLC6A7	TAF12	TJP1	CLDN5
mv Endothelial cells_HPCA_1	17	ACVRL1	CETP	RANGAP1	SELE	TIE1	CLDN5	VWF	HYAL2	EIF2B2	TNFSF18	LYVE1	ARHGEF15	CLEC1A	ROBO4	CXorf36	MMRN2	KANK3
mv Endothelial cells_HPCA_2	29	ACVRL1	CETP	FLT4	HCRTR1	KDR	NOVA2	RALA	RANGAP1	SELE	TEK	TIE1	CLDN5	TPM3	VWF	HYAL2	EIF2B2	TNFSF18	LYVE1	ARHGEF15	CLEC1A	PCDH12	SOX18	ROBO4	TUT1	FAM65A	CXorf36	MMRN2	MYCT1	KANK3
mv Endothelial cells_HPCA_3	20	ACVRL1	CETP	FLT4	RANGAP1	SELE	TIE1	CLDN5	VWF	HYAL2	EIF2B2	TNFSF18	LYVE1	ARHGEF15	CLEC1A	SOX18	ROBO4	TUT1	CXorf36	MMRN2	KANK3
Myocytes_ENCODE_1	10	EVC	SMAD5	MUSK	SGCA	SIM1	BAG2	SHQ1	IMPACT	EXOC1	KRTAP1-1
Myocytes_ENCODE_2	16	COPB1	EVC	SMAD5	MUSK	MYF5	SGCA	SIM1	MAP3K7	DENR	BAG2	SHQ1	IMPACT	EXOC1	XPNPEP3	KRTAP1-1	PRRC1
Myocytes_ENCODE_3	189	ACTG1	ALDOA	ANXA5	ARF4	CAD	CAST	CAV1	CAV3	CCNG1	CCT6A	CDH15	CHRNG	CLTC	COPB1	COX8A	CSNK1G3	DCTD	DDOST	TOR1A	EIF4EBP2	EPRS	ERCC4	EVC	GDI2	GLE1	GNAS	GRSF1	GTF2H1	HIF1A	HRC	HSPA8	IDUA	KIF2A	TNPO1	LAMP1	LGALS1	SMAD2	SMAD5	MIF	MKLN1	MMP11	MSH3	MUSK	MYBPH	MYF5	MYOD1	NDUFA10	2017-09-02
Myocytes_FANTOM_1	17	ALPL	CASQ2	CDH15	DES	HAS1	MYBPH	MYF5	MYH7	MYL1	MYL4	MYOG	RAPSN	SGCA	TNNI1	TNNT2	TTN	MYLPF
Myocytes_FANTOM_2	32	ACTA1	ACTN2	ALPL	CDH15	CKM	MSTN	HAS1	HRC	MUSK	MYBPH	MYF5	MYH1	MYH2	MYH7	MYH8	MYL1	MYL4	MYOD1	MYOG	RAPSN	ROS1	SGCA	SGCG	SLN	TNNC2	TNNI1	TNNT2	ATP1B4	HEYL	ITGB1BP2	MYLPF	GSG1
Myocytes_FANTOM_3	10	CDH15	HAS1	MYF5	MYH7	MYL1	MYL4	MYOG	RAPSN	TNNI1	TNNT2
naive B-cells_BLUEPRINT_1	8	BLK	CXCR5	CD19	MS4A1	CD72	SPIB	TCL1A	FCRL2
naive B-cells_BLUEPRINT_2	18	BLK	CXCR5	CD19	MS4A1	CD22	CD72	CD79B	CCR6	GPR18	CD180	MGAT5	SPIB	TCL1A	MBD4	TSPAN13	UTP6	FCRL2	TREML2
naive B-cells_BLUEPRINT_3	9	BLK	CXCR5	CD19	MS4A1	CD72	CD180	SPIB	TCL1A	FCRL2
naive B-cells_HPCA_1	28	BLK	CD19	MS4A1	CD22	CD37	CD72	CD79A	CSNK1G3	DSP	FCER2	GMFB	PNOC	SNX2	GCM1	AP3B1	MBD4	STAG3	PRDM4	PWP1	RRAS2	GGA2	SIPA1L3	STAP1	P2RY10	DEF8	MFN1	FCRL2	EGOT
naive B-cells_HPCA_2	29	CD1A	CD19	MS4A1	CD22	CD37	CD72	CD79A	CSNK1G3	DSP	FCER2	GMFB	MGAT5	PNOC	SNX2	AP3B1	MBD4	STAG3	PRDM4	PWP1	RRAS2	GGA2	SIPA1L3	STAP1	P2RY10	VPREB3	DEF8	MFN1	FCRL2	EGOT
naive B-cells_HPCA_3	38	BLK	CAPN3	CD1A	CD19	MS4A1	CD22	CD37	CD72	CD79A	CD79B	CSNK1G3	DSP	FCER2	GMFB	HSPA4	MGAT5	PNOC	SNX2	GCM1	AP3B1	MBD4	STAG3	PRDM4	PWP1	SP140	RRAS2	GGA2	SIPA1L3	STAP1	P2RY10	VPREB3	DEF8	MFN1	FCRL2	C10orf76	SMC6	MCM9	EGOT
naive B-cells_NOVERSHTERN_1	47	CXCR5	BMP3	CACNA1F	CAPN3	CD19	MS4A1	CD22	CD72	COL19A1	CSNK1G3	DAZL	DSP	FCER2	GNG3	GPR18	MATN1	MAP3K9	MMP17	MYBPC2	PAX5	PHKG1	PYGM	ZNF154	PRDM2	USP7	TCL1A	SYN3	ADAM20	USP6	AKAP6	TCL1B	BCL2L10	FRS2	PRDM4	RRAS2	GGA2	SIPA1L3	TCL6	TSPAN13	P2RY10	MYO3A	SDK2	WDR74	UBE2O	RBM15	SMC6	KHDRBS2
naive B-cells_NOVERSHTERN_2	38	CXCR5	BMP3	CACNA1F	CAPN3	CD19	MS4A1	CD22	CD72	COL19A1	CSNK1G3	DAZL	FCER2	GNG3	MAP3K9	MMP17	MYBPC2	PAX5	PHKG1	PRDM2	USP7	TCL1A	SYN3	ADAM20	USP6	AKAP6	TCL1B	FRS2	PRDM4	RRAS2	GGA2	SIPA1L3	TCL6	TSPAN13	P2RY10	WDR74	UBE2O	SMC6	KHDRBS2
naive B-cells_NOVERSHTERN_3	69	RERE	CXCR5	BMP3	CACNA1F	CAPN3	CD1A	CD19	MS4A1	CD22	CD72	COL19A1	CSNK1G3	DAZL	DSP	FCER2	GH1	GNG3	HLA-DOA	LY9	MATN1	CIITA	MAP3K9	MMP17	MYBPC2	PAX5	PGAM2	PHKG1	POU2F1	PRKCB	PYGM	RB1	TRA2B	ZNF154	SLC30A4	PRDM2	USP7	CUBN	TCL1A	SYN3	CDK13	PTCH2	ADAM20	USP6	AKAP6	TCL1B	TBC1D5	BCL2L11	STAG3
Neurons_ENCODE_1	9	EPHA3	GNG3	INSM1	KCNQ2	NEUROD2	PCDH8	ACTL6B	CAMKV	STMN4
Neurons_ENCODE_2	166	ABCA3	ACVR2B	ADRA2A	CACNA1B	CACNB3	CHRNB2	CPE	CRABP1	CRMP1	NCAN	CTNNA1	EFNB3	CELSR3	ELAVL3	EPHA3	FOXG1	GAD2	GAP43	GEM	GNG3	GRIK3	GRM2	ID1	INSM1	IREB2	KCNN1	KCNQ2	KCNQ3	KLC1	MEIS2	MLF1	MLLT3	MN1	CD200	MVD	NEUROD2	NNAT	NPY	NPTX1	NTRK3	PCDH8	PLXNA2	POU3F1	POU3F2	POU3F3	PKIA	MAPK8	PTPRZ1
Neurons_ENCODE_3	91	ABCA3	ADRA2A	CACNA1B	CHRNB2	CPE	CRABP1	CRMP1	NCAN	CTNNA1	EFNB3	CELSR3	ELAVL3	EPHA3	FOXG1	GAD2	GAP43	GEM	GNG3	GRIK3	GRM2	INSM1	KCNQ2	KCNQ3	KLC1	MLLT3	CD200	NEUROD2	NNAT	NPY	NPTX1	PCDH8	PLXNA2	POU3F1	POU3F3	PKIA	MAPK8	PTPRZ1	SH3GL2	SH3GL3	SOX11	ZFP37	ZNF14	TUBA1A	ST8SIA4	PDHX	B3GALT2	BSN	HAP1
Neurons_FANTOM_1	107	ALDOC	ATP1A3	ATP1B1	ATP2B2	ATP6V1G2	CA8	CACNB4	CALB1	CAMK2B	CDH18	COX7A1	COX7B	DGKB	DEFB1	DLG2	DPP6	FABP6	FGF9	FGF12	GABBR1	GABRA1	GABRB2	GABRG2	GAD1	GNAO1	GNG3	GPM6A	GRIA2	GRID2	GRIK1	GRM1	GRM7	ID2	ITPR1	KCNC1	KIF5C	LPL	MT3	NDUFA5	NEFM	NEFH	NELL1	NEFL	NPPC	NPTX1	OMG	PCDH9	PCP4
Neurons_FANTOM_2	199	ACYP2	AGTR2	ALDOC	ATP1A3	ATP1B1	ATP1B2	ATP2A3	ATP2B2	ATP6V1G2	CA7	CA8	CACNA1A	CACNB2	CACNB4	CALB1	CAMK2B	CDH18	CHGB	COX7A1	COX7B	DAB1	DACH1	DGKB	DGKG	DEFB1	DLG2	DYNC1I1	DPP6	FABP3	FABP6	FGF9	FGF12	FGF14	GABBR1	GABRA1	GABRB2	GABRB3	GABRG2	GAD1	GAD2	GNAO1	GNG3	GNG4	GPM6A	GRIA2	GRIA3	GRID2	GRIK1
Neurons_FANTOM_3	160	ACYP2	ALDOC	ANK2	ATP1A3	ATP1B1	ATP2A3	ATP2B2	ATP6V1G2	CA8	CACNA1A	CACNB2	CACNB4	CALB1	CAMK2B	CDH18	CHGB	CHN1	COX7A1	COX7B	CRMP1	DGKB	DGKG	DEFB1	DLG2	DYNC1I1	DPP6	FABP3	FABP6	FABP7	FGF9	FGF12	FGF14	GABBR1	GABRA1	GABRB2	GABRG2	GAD1	GNAO1	GNG3	GPM6A	GPM6B	GRIA2	GRID2	GRIK1	GRM1	GRM7	ID2	ITPR1
Neutrophils_BLUEPRINT_1	9	CA4	CEACAM3	FCGR3B	CXCR1	CXCR2	PGLYRP1	MMP25	ZDHHC18	TRPM6
Neutrophils_BLUEPRINT_2	8	CA4	CEACAM3	FCGR3B	CXCR1	PGLYRP1	VNN3	MMP25	ZDHHC18
Neutrophils_BLUEPRINT_3	8	CA4	CEACAM3	CXCR1	CXCR2	PGLYRP1	P2RY13	MMP25	ZDHHC18
Neutrophils_FANTOM_1	42	APAF1	CBL	CEACAM3	CSF2RB	DDX3X	FCAR	FCGR3B	FPR2	CXCR2	NFYA	PAK2	PTEN	SLC19A1	UBE2B	BEST1	ELL	MTMR3	HERC3	PGLYRP1	SLC25A44	DHX34	TOX4	TECPR2	WWP2	LMTK2	WDFY3	MED13L	ACAP2	CLEC4E	UBN1	NRBF2	TREM1	HRH4	RMND5A	TMUB2	TMEM185B	GCC1	TREML2	BTNL8	NDEL1	ZDHHC18	UBXN2B
Neutrophils_FANTOM_2	60	APAF1	CA4	CASP5	CBL	CEACAM3	CEACAM8	CSF2RB	DDX3X	FCAR	FCGR3B	FPR2	CXCR2	MAK	NFYA	PTEN	SDF2	SLC19A1	TGM3	TOP1	UBE2B	UBE2D1	BEST1	TRIM25	ELL	KSR1	MTMR3	HERC3	PGLYRP1	SPAG9	NMI	CIR1	TTLL4	SLC25A44	DHX34	IP6K1	TOX4	TECPR2	USP15	CAMKK2	LILRA1	WWP2	BTN2A1	LMTK2	WDFY3	MED13L	ACAP2	PADI4	CLEC4E
Neutrophils_FANTOM_3	36	APAF1	CBL	CEACAM3	CSF2RB	DDX3X	FCGR3B	FPR2	CXCR2	NFYA	PTEN	SLC19A1	UBE2B	BEST1	ELL	MTMR3	HERC3	PGLYRP1	DHX34	TECPR2	WWP2	LMTK2	WDFY3	MED13L	ACAP2	CLEC4E	UBN1	NRBF2	TREM1	HRH4	TMUB2	GCC1	TREML2	BTNL8	NDEL1	ZDHHC18	UBXN2B
Neutrophils_HPCA_1	9	CLC	CSF3R	FCGR3B	FPR2	HBB	CXCR2	S100A12	P2RY13	TREM1
Neutrophils_HPCA_2	9	CLC	CSF3R	FCGR3B	FPR2	HSPA6	CXCR2	S100A12	P2RY13	TREM1
Neutrophils_HPCA_3	12	CLC	CSF3R	FCGR3B	FPR2	HBB	HSPA6	CXCR2	S100A12	LILRB2	LILRA2	P2RY13	TREM1
Neutrophils_IRIS_1	8	CEACAM3	FCGR3B	CXCR1	CXCR2	MEFV	VNN3	MMP25	BTNL8
Neutrophils_IRIS_2	15	BMX	CA4	CEACAM3	FCGR3B	FPR2	CXCR1	CXCR2	MEFV	AATK	P2RY13	TREM1	VNN3	MMP25	BTNL8	TRPM6
Neutrophils_IRIS_3	17	BMX	CA4	CEACAM3	FCGR3B	FPR2	GPR27	CXCR1	CXCR2	MEFV	IL18RAP	AATK	P2RY13	TREM1	VNN3	MMP25	BTNL8	TRPM6
NK cells_BLUEPRINT_1	13	FASLG	KLRD1	PTGDR	PTPN4	XCL1	TKTL1	IL18RAP	NCR1	ZMYND11	SACM1L	CD244	AGK	DNAJB14
NK cells_BLUEPRINT_2	36	FASLG	CX3CR1	GZMB	GZMM	IL2RB	KLRD1	KPNB1	MED1	PRF1	MAPK1	PTGDR	PTPN4	BRD2	XCL1	MAP3K7	TKTL1	TNFSF11	IL18RAP	ZNF264	NCR1	STX8	PJA2	HELZ	GNLY	STAG2	ZMYND11	ZBTB1	SACM1L	TBX21	RAB14	CD244	AGK	DNAJB14	FIP1L1	ARPC5L	HIPK1
NK cells_BLUEPRINT_3	25	FASLG	CD247	CTSW	CX3CR1	GZMB	IL2RB	KLRD1	LTA	PRF1	PTGDR	PTPN4	XCL1	TKTL1	TNFSF11	IL18RAP	NCR1	GNLY	ZMYND11	SACM1L	TBX21	CD244	AGK	ZNF426	DNAJB14	HIPK1
NK cells_FANTOM_1	15	FASLG	CD247	CX3CR1	GRIK4	GZMB	IL2RB	LIM2	PRF1	PTGDR	TKTL1	NCR1	NMUR1	GNLY	CD160	TBX21
NK cells_FANTOM_2	8	IL2RB	PTGDR	XCL1	IL18RAP	NCR1	SACM1L	DNAJB14	ARPC5L
NK cells_FANTOM_3	8	GZMB	IL2RB	LIM2	PTGDR	NCR1	NMUR1	GNLY	CD160
NK cells_HPCA_1	51	BAD	CD247	2017-09-07	CHRNE	DR1	GIPR	GOLGA4	GZMH	GZMB	GZMM	HNRNPL	IFNG	LAG3	MGAT2	MLH1	NEK1	NFE2L2	NKG7	PPP2CA	PRF1	PRKAG1	PTGDR	XCL1	SON	SUPV3L1	TBCC	PRDM2	HIST1H3A	NCR1	PRDX6	YAF2	KLRG1	SF3B4	NMUR1	GNA13	GPATCH8	DNAJC2	ASTE1	ANKRD11	TBX21	AMZ2	THAP1	UBE2Q1	CDKN2AIP	RBM25	DNAJB14	OSBPL7	TSTD2
NK cells_HPCA_2	37	BAD	CHRNE	CTSW	DR1	GIPR	GOLGA4	GTF3C1	GZMH	IFNG	KLRD1	LAG3	MGAT2	NKG7	PPP2CA	PTGDR	XCL1	FBXW4	SUPV3L1	TSPYL1	HIST1H3A	RGS9	IL18RAP	NCR1	RBM39	NMUR1	GNLY	ZCCHC11	LEMD3	ASTE1	TBX21	IL21R	AMZ2	WBP11	RSRC2	ALG13	COQ10B	HIPK1
NK cells_HPCA_3	39	BAD	CD247	2017-09-07	CHRNE	DR1	GIPR	HNRNPL	IFNG	IL2RB	MLH1	NEK1	NKG7	PRF1	PRKAG1	PTGDR	SBF1	CCL4	XCL1	TBCC	HIST1H3A	NCR1	GGPS1	PRDX6	ZBTB39	YAF2	SF3B4	NMUR1	WDR45	GPATCH8	ASTE1	TBX21	IL21R	AMZ2	THAP1	UBE2Q1	CDKN2AIP	OSBPL7	TSTD2	NCR3
NK cells_IRIS_1	13	FASLG	KLRD1	PTGDR	PTPN4	XCL1	TKTL1	IL18RAP	NCR1	ZMYND11	SACM1L	CD244	AGK	DNAJB14
NK cells_IRIS_2	19	FASLG	CTSW	CX3CR1	GZMM	KLRD1	MED1	PTGDR	PTPN4	XCL1	TKTL1	TNFSF11	IL18RAP	ZNF264	NCR1	ZMYND11	SACM1L	CD244	AGK	DNAJB14
NK cells_IRIS_3	8	KLRD1	PTGDR	PTPN4	XCL1	TKTL1	IL18RAP	NCR1	DNAJB14
NK cells_NOVERSHTERN_1	8	CHRNE	GIPR	IFNG	HIST1H3A	NCR1	NMUR1	ASTE1	TBX21
NK cells_NOVERSHTERN_2	9	CHRNE	GIPR	IFNG	PRKAG1	HIST1H3A	NCR1	NMUR1	ASTE1	AMZ2
NK cells_NOVERSHTERN_3	9	GZMH	GZMB	KLRD1	PRF1	NCR1	NMUR1	GNLY	CD160	TBX21
NKT_NOVERSHTERN_1	9	CASP5	PHKG1	RARA	S100B	BEST1	DOLK	TP53TG5	GMIP	GSG1
NKT_NOVERSHTERN_2	12	AMBN	CASP5	PHKG1	RARA	S100B	SGCA	TCOF1	BEST1	IL17B	TP53TG5	GMIP	L1TD1
NKT_NOVERSHTERN_3	10	PHKG1	RARA	BEST1	ARPC1A	TP53TG5	L1TD1	KLHL26	GEMIN7	GSG1	PMFBP1
Osteoblast_FANTOM_1	41	BMPR1A	COMP	DCTD	DYNC1LI2	EPYC	GRSF1	IBSP	MFAP3	PRELP	SGCG	UBE2L3	COL14A1	ITGA8	EIF2S2	KIF3B	LAPTM4A	APPBP2	MAB21L2	ILVBL	XPOT	DOLK	ICMT	TMEM50A	CBY1	RPS6KC1	COPS7A	MYOZ2	NUDT9	RNF121	LIN7C	DHX32	IL26	STARD7	C5orf15	PAPPA2	EBF2	ATG9A	MUL1	TM2D3	UNC119B	LRRC15
Osteoblast_FANTOM_2	38	ARCN1	BMPR1A	DYNC1LI2	EPYC	GRSF1	HTR2A	IBSP	MFAP3	PSMB5	SGCG	UBE2L3	COL14A1	ITGA8	KIF3B	EIF4E2	FRMPD4	APPBP2	MAB21L2	YME1L1	ILVBL	XPOT	ICMT	CBY1	RPS6KC1	MYOZ2	RNF121	LIN7C	NPLOC4	IL26	STARD7	PAPPA2	EBF2	FTO	TM2D3	UNC119B	FAM168B	LRRC15	YIPF6
Osteoblast_FANTOM_3	60	ARCN1	BMPR1A	COMP	DCTD	DYNC1LI2	EPYC	GRSF1	HLCS	IBSP	MFAP3	PRELP	PSMB5	SGCD	SGCG	UBE2L3	COL14A1	ITGA8	EIF2S2	KIF3B	LAPTM4A	FRMPD4	YAP1	APPBP2	MAB21L2	YME1L1	ILVBL	XPOT	DOLK	TRIM32	ZNF629	ICMT	TMEM50A	MKRN2	CBY1	TRAF3IP1	RPS6KC1	COPS7A	AMOTL2	MYOZ2	NUDT9	RNF121	LIN7C	NPLOC4	DHX32	IL26	KCMF1	STARD7	C5orf15
Osteoblast_HPCA_1	35	ACTG1	RHOA	CCKAR	EXTL1	FOXC2	GGCX	GLUD1	HIST1H1A	NFATC4	PGK1	SLC9A5	TUB	ZNF16	GDF5	SSNA1	EIF3G	FIBP	LONP1	ABCF2	RNF41	ARPC1A	MAB21L2	TXNL4A	CBY1	TRPC4AP	CHMP2A	ARL6IP4	TMED9	GLT8D1	PCDHGA11	IFT46	CUEDC2	FIP1L1	SFXN3	TMEM222
Osteoblast_HPCA_2	16	RHOA	EXTL1	GGCX	NFATC4	ZNF16	GDF5	FIBP	LONP1	ABCF2	MAB21L2	TXNL4A	CHMP2A	ARL6IP4	PCDHGA11	CUEDC2	TMEM222
Osteoblast_HPCA_3	61	ACTG1	RHOA	CCKAR	AP2S1	ATF6B	DPAGT1	DRG2	EXTL1	FOXC2	GGCX	GLUD1	HIST1H1A	HARS	IARS	EIF6	KIF22	NFATC4	PGK1	SLC9A5	SSR1	TUB	ZFPL1	ZNF16	GDF5	AKR7A2	SSNA1	EIF3G	FIBP	COX7A2L	LONP1	SNX17	ABCF2	SNUPN	RNF41	ARPC1A	MAB21L2	TXNL4A	PARK7	EXOC7	ABCB9	MTCH1	CBY1	LMOD1	TRPC4AP	HSPB7	CHMP2A	EPN1	ARL6IP4
pDC_FANTOM_1	12	APOC3	CSHL1	DNASE1L3	GZMB	HIST1H2BB	HPD	KCNA5	SCT	P2RY14	LILRB4	CUX2	LRRC36
pDC_FANTOM_2	11	CSHL1	DNASE1L3	GZMB	HIST1H2BB	KCNA5	RPL3L	SCT	P2RY14	LILRB4	CUX2	LRRC36
pDC_FANTOM_3	25	CACNB1	DNASE1L3	FKBP2	GZMB	IL3RA	KCNA5	MYBPC1	SCT	SLC12A3	SPIB	ZNF221	MAPKAPK2	P2RY14	CXCL13	LILRB4	SLITRK3	CUX2	TSPAN13	SPCS1	TLR7	KCNK10	KCTD5	LRRC36	CELA2A	CCR2
pDC_NOVERSHTERN_1	9	FLT3	FUT7	GZMB	IDH3A	SCT	SPIB	CD2AP	TLR7	PTCRA
pDC_NOVERSHTERN_2	10	FLT3	FUT7	GZMB	IDH3A	SCT	SPIB	CD2AP	TLR7	KCNK10	PTCRA
pDC_NOVERSHTERN_3	13	RUNX2	FLT3	FUT7	CXCR3	GZMB	IDH3A	SCT	SPIB	TACR1	CD2AP	TLR7	KCNK10	PTCRA
Pericytes_ENCODE_1	25	ADCY3	CDK4	GGCX	HIC1	MLLT1	MYBPC2	P4HB	MAPK3	PTGER1	SLC6A13	TAF15	DYNLL1	ASH2L	ZBTB22	S1PR2	BCKDK	COPS6	TMED1	CBX6	TXN2	TMEM184B	ERGIC3	MIER2	ZNF444	PRDM11
Pericytes_ENCODE_2	97	ADCY3	ARF5	ARNT	ATP5G1	ATP5J	CALR	CDK4	CTBP1	DMWD	ELK1	GGCX	HIC1	ISLR	KIF22	MLLT1	MMP11	MYBPC2	MYBPH	NDUFB1	NDUFB7	NNAT	P4HB	PFN1	PPP2CB	PPP2R5D	MAPK3	PSMD8	PTGER1	TRIM27	SLC6A13	TNXB	SLC35A2	ZFPL1	TAF15	LZTR1	AKR7A2	DYNLL1	AP3D1	ASH2L	KCNAB3	ZBTB22	S1PR2	MED16	CTDSP2	ARFRP1	RNF41	BCKDK	TAB1
Pericytes_ENCODE_3	94	ATP5J	BCS1L	CALR	DPAGT1	ELK1	GNAS	HIC1	DNAJC4	MMP11	MYBPC2	NDUFA8	NDUFB1	NDUFB7	NDUFS5	P4HB	PPIB	PPP2R5D	PSKH1	PSMD8	PTGER1	RAB5B	DPF2	TRIM27	RPN1	RXRB	SH3GL1	SLC6A4	SLC6A13	SSR2	SLC35A2	ZFPL1	USP5	LZTR1	CDK10	KHSRP	AKR7A2	DYNLL1	EDF1	AP3D1	ASH2L	KCNAB3	ZBTB22	SEC24C	SNX17	SEC16A	MED16	CTDSP2	ARFRP1
Pericytes_FANTOM_1	14	FLT1	GDNF	HTR2B	P2RX1	POU2F2	MASP1	KSR1	S1PR2	HAND2	ADAMTSL2	COLEC10	BTN2A1	KIF26B	ADAMTS12
Pericytes_FANTOM_2	13	COL10A1	SLC31A1	FLT1	GDNF	HTR2B	MASP1	HAND2	ADAMTSL2	DSCR4	COLEC10	IGF2BP3	ABTB2	ADAMTS12
Pericytes_FANTOM_3	8	FLT1	GDNF	HTR2B	MASP1	COLEC10	BTN2A1	KIF26B	ADAMTS12
Plasma cells_BLUEPRINT_1	9	AMPD1	TNFRSF17	FKBP2	PNOC	SSR4	RNGTT	SPATS2	UBA5	ZBP1
Plasma cells_BLUEPRINT_2	134	ALPI	AMPD1	AVP	TNFRSF17	BMP8B	C21orf2	CAMP	CASP10	CCNC	CD27	ENTPD1	CD79A	CDH15	COX6A2	CRYBB1	CRYBB3	CRYGC	CYP11A1	EPO	FKBP2	GDF2	GOLGA3	GOLGA4	GRM4	GUCA1A	HIST1H2BB	HSF4	HSPA6	IDE	IRF4	KCNN3	MARS	MGAT2	NEUROG1	NOS2	NPAS1	NPPA	NPPC	PNOC	PRM1	PTPRS	RAB3A	RAD17	RGS1	RGS13	RPN2	CCL25	SLC5A2
Plasma cells_BLUEPRINT_3	177	AMPD1	APOA1	APOC3	ARL1	PHOX2A	ARSA	AUP1	TNFRSF17	BMP8B	CA7	CACNA1S	CASP10	CAV1	CCNC	CD19	CD79A	CD79B	CHRNA4	CHRNG	CLCNKB	CRYBA4	CRYBB1	CSHL1	CYBA	CYP11A1	DAD1	DDOST	DNASE1L2	DPAGT1	DRD4	DRD5	FGF6	FKBP2	GH2	GNB3	GOLGB1	GP9	GRIN1	HDLBP	DNAJC4	IGF1	KCNN3	KRT10	CD180	MYL2	NTRK1	P2RY4	PDE6A
Plasma cells_HPCA_1	22	TNFRSF17	CD79A	GABRR2	GPLD1	KCNN3	NPAS1	PNOC	RGS13	CCL25	SLC5A2	SSR4	TP73	TSHR	PREB	CNKSR1	KLF15	VPREB3	TMEM39A	FN3K	UBA5	ADM2	ZBP1
Plasma cells_HPCA_2	38	TNFRSF17	BMP8B	C21orf2	CD27	CD79A	CNR1	FKBP2	GABRR2	GPLD1	HSF4	KCNN3	NPAS1	PNOC	RGS13	CCL25	SLC5A2	SSR4	TCF3	TP73	HSP90B1	TSHR	WNT1	PREB	CNKSR1	SERP1	KLF15	VPREB3	HOOK2	SEC61A1	TMEM39A	FN3K	C16orf58	SPATS2	ACBD4	UBA5	ADM2	ZBP1	SIX5
Plasma cells_HPCA_3	17	TNFRSF17	CD79A	GABRR2	GPLD1	KCNN3	NPAS1	PNOC	RGS13	CCL25	SLC5A2	SSR4	TP73	CNKSR1	KLF15	VPREB3	ADM2	ZBP1
Plasma cells_IRIS_1	9	AMPD1	TNFRSF17	KCNN3	PNOC	RGS13	SSR4	RNGTT	SEC24A	ZBP1
Plasma cells_IRIS_2	41	AMPD1	TNFRSF17	CCNC	CD79A	FKBP2	GOLGA3	HSF4	KCNN3	MGAT2	PNOC	RGS13	SRP54	SSR4	HSP90B1	UBE2G1	RNF113A	MANF	RNGTT	EBAG9	PREB	MRPS31	SEC24A	FNDC3A	ATF6	MAST1	UBXN4	TBL2	SERP1	ALG5	GMPPA	YIPF1	LAX1	TMEM39A	LTB4R2	SPATS2	UBA5	ADM2	ZBP1	USP48	MTDH	IMP4
Plasma cells_IRIS_3	19	AMPD1	TNFRSF17	CCNC	CD79A	FKBP2	KCNN3	PNOC	RGS13	SSR4	TSHR	UBE2G1	RNGTT	PREB	SEC24A	TMEM39A	SPATS2	UBA5	ZBP1	MTDH
Platelets_HPCA_1	132	ADCY8	ALOX12	APOA1	ARHGAP6	AVPR1A	BMP8B	BNIP2	CASQ1	CETP	COL10A1	GNAS	GNB3	GP1BA	GP5	GPR3	GPR17	LPAR4	HPCA	HSD17B3	IL5	ITGA2B	KIF2A	LCN1	LIMS1	SMAD2	MAN2A2	MAX	MEA1	RAB8A	CIITA	MPL	MUC6	NPPA	SIX6	PDE6A	PDE6H	PF4V1	PHKB	PITX3	PLXNB3	PPM1A	PPY	PRKCG	PTPRA	RNF2	RPA1	SELP	SLC6A4
Platelets_HPCA_2	165	ADCY8	ALOX12	AMD1	ANXA7	ARHGAP6	AVPR1A	BMP8B	BNIP2	CASQ1	CETN2	COL10A1	DPYS	EGR4	F13A1	GNAS	GNB3	GP1BA	GP5	GP9	GPR3	GPR17	LPAR4	GRIK1	HPCA	HSD17B3	IL5	ITGA2B	KIF2A	LCN1	LIMS1	SMAD2	MAN2A2	MAX	MEA1	RAB8A	FOXO4	MPL	MTR	NOS2	NPPA	ODC1	SIX6	PDE6A	PDE6H	PF4V1	PHKB	PITX3	PPM1A
Platelets_HPCA_3	12	ALOX12	ARHGAP6	GP1BA	PDE6H	PF4V1	SELP	SEC14L5	ACSBG1	MLH3	CLEC1B	CABP5	TUBB1
Preadipocytes_ENCODE_1	25	ARCN1	ARL1	CDK7	FGF7	GLG1	HAS1	HDLBP	SSR1	TESK1	TMEM11	BUB3	HAND2	BAG3	MORF4L2	TUBA1B	NCKAP1	KDELR2	SEC63	FAM98A	TCTN3	MMADHC	GLT8D1	SRPRB	ALG8	SLC25A32
Preadipocytes_ENCODE_2	13	FGF7	HAS1	SSR1	TMEM11	BUB3	HAND2	BAG3	MORF4L2	NCKAP1	KDELR2	GLT8D1	ALG8	SLC25A32
Preadipocytes_ENCODE_3	148	ADH5	ALCAM	SLC25A6	ANXA1	ANXA5	ARCN1	RHOA	ARL1	ARSB	ATP5C1	ATP5G1	CANX	CAST	CDK7	COPA	COPB1	ATF6B	DPAGT1	TOR1A	ECT2	ELK1	EPRS	FGF7	GLG1	GRSF1	HAS1	HDLBP	HIF1A	HSPA4	IARS	ISLR	MOCS2	NACA	NDUFB4	OCRL	P4HB	PPIB	PTGIR	PTPN11	PURA	RARS	RNF2	RPN2	RRM1	SNAPC2	SSR1	TESK1	TNXB
Preadipocytes_FANTOM_1	19	ADCYAP1R1	AQP9	CYP19A1	HIST1H2BB	IRF4	IPO5	SLC1A2	TNXB	IPO7	ADAMTS8	ABCA6	FAM98A	SNED1	PIWIL2	EDA2R	EBF2	TRPM3	IL17RC	TBC1D16
Preadipocytes_FANTOM_2	9	ARHGAP6	ACE	HAS1	IRF4	TNXB	ADAMTS8	ABCA6	SNED1	EBF2
Preadipocytes_FANTOM_3	32	ADCYAP1R1	AQP9	ARHGAP6	CENPE	CYP19A1	ACE	GLUD1	HIST1H2BB	HAS1	IRF4	IPO5	LSP1	SLC1A2	TNXB	XPNPEP2	HIST1H2BM	S1PR2	IPO7	ADAMTS8	MRPS27	SMC5	MDN1	ABCA6	FAM98A	SNED1	TREM1	PIWIL2	EDA2R	EBF2	TRPM3	IL17RC	TBC1D16
pro B-cells_HPCA_1	55	AFM	ALPL	CCR8	CRX	DCC	DNTT	GABRA6	GCK	GPR3	GPR4	GRIK3	GYS2	TLX2	KNG1	MEN1	MUSK	OMD	PARK2	POU3F1	RAG2	RPE65	SLC2A2	SLC12A1	SRY	VPREB1	CSRP3	HIST1H2BM	SOX14	CACNA1G	GREB1	CNKSR1	ARPP21	FRS3	LILRB1	CLDN14	PLA2G2D	OR7A5	AKAP8L	STRN4	GNL2	TNFRSF12A	LARP7	BTBD7	SPATA7	HAMP	C2orf49	CXorf36	LRRTM4
pro B-cells_HPCA_2	156	ADARB2	ADCY8	AGXT	ALOX15B	ANXA3	APOC3	ARG1	ART4	BMX	CA1	CCKAR	SIGLEC6	CETP	CLCN1	CNTFR	CRH	CSHL1	CTSG	CYP2A7	DCC	DLX4	DNTT	DPYS	DSP	EFNA2	FCAR	FCN2	FGF8	MSTN	GDF10	GPR3	GPR4	GRIK3	GYS2	HCRTR2	ONECUT1	PRMT1	HTR1B	HTR5A	IFNA1	IGLL1	IL12B	KCNJ9	KCNJ13	KRT12	KRT19	LLGL1	LTC4S
pro B-cells_HPCA_3	51	ARG1	CLCN1	CNTFR	CSHL1	DCC	DNTT	FCAR	FGF8	GPR3	HTR1B	IGLL1	LTC4S	MEP1B	TRPM1	MUC6	PRB4	PSG11	RAG2	MRPL12	SGCA	TACR3	TCOF1	TESK1	TGM3	VPREB1	ZNF155	HIST1H2BL	SOX14	ADAM21	KCNQ4	ARPP21	FRS3	LILRB1	ADAMTS8	LAMB4	CLDN14	FBXO24	AKAP8L	AHDC1	BMP10	VSX1	PCDHA5	OTUD7B	SPC25	HAMP	MYL7	DPEP3	C2orf49
pro B-cells_NOVERSHTERN_1	60	AZU1	BLK	CD72	CD79B	CENPA	CETP	DNTT	FOXM1	FLT3	H2AFX	IGLL1	KIF11	LY6H	MKI67	MYBL2	PDE6D	POLA1	PRTN3	RAG2	RFC2	RFC5	RRM2	SMARCA4	SNRPD1	SPTA1	TCF3	TERT	TOP2B	TSSC1	VPREB1	XPNPEP2	PTTG1	TCL1B	ESPL1	KIF14	P2RY14	SMC4	TACC3	NOP56	SIVA1	ARPP21	HNRNPA0	UBE2C	KIF4A	OR7A5	VPREB3	TRA2A	SAC3D1
pro B-cells_NOVERSHTERN_2	13	BLK	CD72	CD79B	DNTT	FLT3	IGLL1	PRTN3	RAG2	VPREB1	ARPP21	VPREB3	QRSL1	CCDC81
pro B-cells_NOVERSHTERN_3	15	BLK	CD72	CD79B	DNTT	FLT3	IGLL1	LY6H	MYBL2	PRTN3	RAG2	VPREB1	ARPP21	VPREB3	QRSL1	CCDC81
Sebocytes_FANTOM_1	32	CALML3	CSF2	CSTA	CTSK	DSG3	GJB5	SFN	IL1A	IRF6	KRT6B	LAD1	MMP3	PI3	PKP1	SOX15	SULT2B1	KRT75	FGFBP1	AP1M2	PDZK1IP1	FST	IL24	LPAR3	TFCP2L1	HES2	TMEM40	LTB4R2	RAB25	S100A14	C1orf116	ZNF750	KRT6C
Sebocytes_FANTOM_2	24	CALML3	CSF2	CSTA	CTSK	DSG3	GJB5	SFN	IL1A	KRT6B	MMP3	PI3	PKP1	SOX15	SULT2B1	KRT75	FGFBP1	AP1M2	PDZK1IP1	HES2	TMEM40	RAB25	S100A14	ZNF750	KRT6C
Sebocytes_FANTOM_3	35	CALML3	ENTPD3	CSF2	CSTA	CTSK	DSG3	GJB3	GJB5	SFN	IL1A	IRF6	KRT6B	LAD1	MMP3	PI3	PKP1	PTK6	SOX15	SULT2B1	KRT75	FGFBP1	AP1M2	PDZK1IP1	FST	IL24	LPAR3	TFCP2L1	HES2	TMEM40	LTB4R2	RAB25	S100A14	C1orf116	ZNF750	KRT6C
Skeletal muscle_ENCODE_1	8	CAV3	CDH15	CHRNG	MYBPH	MYF5	RAPSN	MYLPF	EBF2
Skeletal muscle_ENCODE_2	10	CAV3	CDH15	CHRNG	MYBPH	MYF5	MYOD1	RAPSN	MYLPF	LSM2	EBF2
Skeletal muscle_ENCODE_3	8	CDK1	CENPE	CHRNG	MYBPH	MYOG	RAPSN	MYLPF	EBF2
Skeletal muscle_FANTOM_1	94	ACHE	ACTA1	ACTN2	AMPD1	ART1	ART3	ATP1A2	ATP2A1	CA3	CACNA1S	CACNB1	CACNG1	CASQ1	CDH15	CHRND	CHRNG	CKM	CNTFR	COX6A2	DES	RAPGEF1	HADHB	HRC	KCNN3	MUSK	MYBPC1	MYBPC2	MYBPH	MYF6	MYH1	MYH2	MYH6	MYH7	MYL1	MYL2	MYL3	MYOD1	MYOG	NRAP	PCNT	PGAM2	PGM1	PHKG1	PPP1R3A	PYGM	RAD23A	RAPSN	RPL3L
Skeletal muscle_FANTOM_2	69	ACTA1	ACTN2	AMPD1	ART1	ART3	ATP1A2	ATP2A1	CA3	CACNA1S	CACNB1	CACNG1	CASQ1	CDH15	CHRND	CHRNG	CKM	COX6A2	DES	HRC	KCNN3	MYBPC1	MYBPC2	MYBPH	MYF6	MYH1	MYH2	MYH6	MYH7	MYL1	MYL2	MYL3	MYOG	NRAP	PGAM2	PHKG1	PPP1R3A	PYGM	RAPSN	RPL3L	SGCA	SGCG	SLC2A4	SLN	SPTB	TNNC2	TNNI1	TNNT3	TTN
Skeletal muscle_FANTOM_3	77	ACTA1	ACTN2	AMPD1	ART1	ART3	ATP1A2	ATP2A1	CA3	CACNA1S	CACNB1	CACNG1	CASQ1	CDH15	CHRND	CHRNG	CKM	COX6A2	DES	HADHB	HRC	KCNN3	MUSK	MYBPC1	MYBPC2	MYBPH	MYF6	MYH1	MYH2	MYH6	MYH7	MYL1	MYL2	MYL3	MYOG	NRAP	PCNT	PGAM2	PHKG1	PPP1R3A	PYGM	RAPSN	RPL3L	CLIP1	SGCA	SGCG	SLC2A4	SLN	SPTB
Smooth muscle_ENCODE_1	13	COPA	COPB1	FKTN	HDLBP	PFN2	PRKAG1	PRKG1	USO1	ASAP2	BAG2	PREPL	VTI1B	HSPB6
Smooth muscle_ENCODE_2	26	ARL1	COPA	COPB1	DCTN1	DYNC1LI2	FKTN	HDLBP	HOXA3	LGALS1	PFN2	PRKAG1	PRKG1	TCF21	GDF5	USO1	MBTPS1	ASAP2	COPS2	VTI1B	ANAPC13	MYOF	AMZ2	KLHL9	ACBD3	DYNLRB1	HSPB6
Smooth muscle_ENCODE_3	56	ADH1B	ALCAM	ARCN1	ARL1	COPA	COPB1	DCTN1	DYNC1LI2	EIF4G2	FKTN	HDLBP	HOXA3	HPD	ISLR	IPO5	LGALS1	NBR1	OCRL	OGN	PFN2	PRKAG1	PRKG1	SDF2	TCF21	GDF5	USO1	MBTPS1	ASAP2	COPS2	KIF3B	SCAMP1	BAG2	PREPL	TTC37	CRYZL1	STAM2	VTI1B	ERLIN1	FAF2	EID1	ANAPC13	MYOF	INVS	COPS7A	DCTN4	AMZ2	UFSP2	KLHL9
Smooth muscle_FANTOM_1	192	ADD1	ADH1B	ADH5	ALCAM	ANXA5	ARCN1	ARF4	ARHGAP6	ARL1	BAD	CACNA1C	CAPNS1	CETN2	COPA	COPB1	CSNK1G3	CSNK2A2	CTNNA1	DCTN1	DDB1	DYNC1LI2	DPT	EIF4G2	ELN	FKTN	FGF7	FSHB	GDF10	GOLGA3	GRSF1	HDLBP	HLCS	HOXA3	HPD	HSP90AB1	ISLR	IPO5	KRT19	KTN1	LGALS1	LTC4S	NBR1	SMAD5	MEA1	2017-09-02	NFATC4	OCRL	OGN
Smooth muscle_FANTOM_2	26	ARL1	COPA	COPB1	DCTN1	DYNC1LI2	FKTN	HDLBP	HOXA3	LGALS1	PFN2	PRKAG1	PRKG1	TCF21	GDF5	USO1	MBTPS1	ASAP2	COPS2	VTI1B	ANAPC13	MYOF	AMZ2	KLHL9	ACBD3	DYNLRB1	HSPB6
Smooth muscle_FANTOM_3	66	ADD1	ALCAM	ARF4	COPA	DCTN1	DPT	FKTN	FGF7	GDF10	HDLBP	HOXA3	HPD	ISLR	LGALS1	NBR1	SMAD5	NFATC4	OCRL	OGN	PCDHGC3	PEX12	PFN2	PRKG1	S100A6	S100A10	ATXN2	SSR1	TCF21	CLEC3B	GDF5	ZMYM4	COPS2	TXNL1	SCAMP1	BAG2	TTC37	CUL7	ABI2	SPIN1	KDELR1	EMILIN1	EXOC7	EID1	TMEM59L	CIZ1	FAM98A	HSPB7	AMZ2
Smooth muscle_HPCA_1	8	CDK4	LGALS1	PLS3	SOD1	TMED7	DDX47	UFC1	CISD1
Smooth muscle_HPCA_2	14	CCNG1	CETN2	NDUFS4	PLS3	RPL10	RPS19	S1PR2	RNF7	MCTS1	DDX47	POMP	TMED9	ADAMTS12	GTF2H5
Smooth muscle_HPCA_3	144	ACTG1	ADH5	ALDOA	ANXA1	ANXA5	RHOC	ATP5G1	ATP5J	BYSL	PTTG1IP	CALR	CANX	CAPN2	CCNG1	CDK4	CDK7	CETN2	CNN2	COPA	COPB1	COX8A	ECT2	EEF1D	ERCC1	FKTN	GOLGA3	HADHA	HDLBP	HIC1	HSPA8	EIF6	LAMP1	LGALS1	MIF	MYL6	NDUFA8	NDUFB4	NDUFS4	NDUFS5	2017-09-02	NFATC4	P4HB	PLS3	POLR2F	PSMB1	PSMB4	PSMB5	PSMC5
Tgd cells_HPCA_1	153	AK2	ABCD2	FASLG	BUB1	CCNF	CD2	CD247	CD40LG	CDC25C	CENPA	CHEK1	CLIC1	CCR3	CCR5	DAXX	DR1	ECT2	GLE1	GLO1	GPI	CXCR3	GPR15	GYG1	GZMH	GZMA	GZMB	GZMK	H2AFX	HMOX2	IL2RA	IL2RB	IL4	IL5	IL12RB1	IL13	ITGAL	ITGB7	KIF2A	KIF11	KIF22	LAG3	LAIR2	LCP2	LIM2	LTA	MKI67	MSH3	NEK2
Tgd cells_HPCA_2	164	ABCD2	FASLG	BUB1	CCNA2	CCNF	CD2	CD247	CDK1	CDC5L	CDC25C	CENPA	CLIC1	CCR3	CCR5	COX8A	CSTF1	DAXX	DR1	DRG2	TOR1A	ECT2	GLE1	GLO1	GPI	CXCR3	GPR15	GYG1	GZMH	GZMA	GZMB	GZMK	H2AFX	HIC1	HMOX2	IFNG	IL2RA	IL2RB	IL4	IL5	IL12RB1	IL13	INPP4A	ITGAL	ITGB7	LAG3	LAIR2	LCP2	LIM2
Tgd cells_HPCA_3	183	ABCD2	FASLG	BARD1	BUB1	CCNA2	CCNF	CD2	CD247	CD40LG	CDK1	CDC25C	CENPA	CLIC1	CCR3	CCR5	COX8A	CTLA4	DAXX	DR1	DRG2	ECT2	GLE1	GLO1	GPI	CXCR3	GPR15	GYG1	GZMH	GZMA	GZMB	GZMK	H2AFX	HIC1	HMOX2	HNRNPF	IFNG	IL2RA	IL2RB	IL4	IL5	IL12RB1	IL13	INPP4A	ITGAL	ITGB7	KIF2A	KIF22	LAG3
Th1 cells_IRIS_1	24	CHD4	CSTF1	IFNG	LAG3	MNAT1	POLD2	PPM1G	SLAMF1	SNRPC	THOP1	CDC123	EIF2B2	FIBP	CHD1L	MDC1	TRIM28	GNLY	RUVBL2	NCAPD3	R3HDM1	TACO1	TMEM39B	UBAP2	CUEDC2
Th1 cells_IRIS_2	10	IFNG	LAG3	SNRPC	GNLY	RUVBL2	NCAPD3	TACO1	TMEM39B	UBAP2	CUEDC2
Th1 cells_IRIS_3	17	COX10	IFNG	LAG3	PSMD3	SNRPC	EIF2B2	PKMYT1	PTTG1	KIF20A	RNPS1	TTLL5	NUP205	ZBTB32	HTRA2	WRAP53	WDR18	CUEDC2
Th2 cells_IRIS_1	8	GZMK	IL5	IL13	MAD2L1	RRM2	BAG2	CXCR6	CEP55
Th2 cells_IRIS_2	9	IL5	IL13	MAD2L1	BAG2	CXCR6	RRAS2	CEP55	NUP37	NPHP4
Th2 cells_IRIS_3	16	GPR15	GZMA	IL5	IL13	SMAD2	CDK2AP1	RGS9	BAG2	SLC25A44	RAD50	CXCR6	TMEM39B	UBAP2	THADA	RNF34	NPHP4
Tregs_BLUEPRINT_1	22	CCR3	CTLA4	IL2RA	PLCL1	PPM1B	TTN	ZNF236	STAM	UBE4A	CXCR6	IPCEF1	ICOS	VPS54	LAX1	BANP	ATG2B	ZCCHC8	TULP4	IKZF4	ZMYM1	ZFC3H1	MCM9
Tregs_BLUEPRINT_2	9	CTLA4	IL2RA	PLCL1	ZNF236	STAM	IPCEF1	ICOS	BANP	IKZF4
Tregs_BLUEPRINT_3	15	CTLA4	IL2RA	PLCL1	PPM1B	ZNF236	STAM	IPCEF1	ICOS	VPS54	BANP	ATG2B	ZCCHC8	TULP4	IKZF4	ZFC3H1
Tregs_FANTOM_1	9	CTLA4	IL2RA	PLCL1	ZNF236	STAM	IPCEF1	ICOS	BANP	IKZF4
Tregs_FANTOM_2	15	CTLA4	IL2RA	PLCL1	PPM1B	ZNF236	STAM	IPCEF1	ICOS	VPS54	BANP	ATG2B	ZCCHC8	TULP4	IKZF4	ZFC3H1
Tregs_FANTOM_3	21	CD5	CD28	CCR4	CCR8	CTLA4	GPR25	IL2RA	IL10RA	ITGB7	KCNA2	PLCL1	RGS1	SPTAN1	HS3ST3B1	MCF2L2	GALNT8	SIT1	ICOS	FOXP3	LRP2BP	TULP4
Tregs_HPCA_1	12	CCR4	CCR8	CTLA4	GPR25	IL2RA	KCNA2	LAIR2	RGS1	HS3ST3B1	MCF2L2	ICOS	FOXP3
Tregs_HPCA_2	10	CCR4	CCR8	CTLA4	GPR25	IL2RA	KCNA2	LAIR2	HS3ST3B1	MCF2L2	FOXP3
Tregs_HPCA_3	11	CCR4	CCR8	CTLA4	GPR25	IL2RA	KCNA2	LAIR2	RGS1	HS3ST3B1	MCF2L2	FOXP3
[truncated: 152 more columns]

## Sheet: T-cells subpopulations
Cell Type	CD8+ T-cells							CD4+ T cells								CD4+ T-reg
Cluster	CD8-C1-LEF1	CD8-C2-CD28	CD8-C3-CX3CR1	CD8-C4-GZMK	CD8-C5-ZNF683	CD8-C6-LAYN		CD4-C1-CCR7	CD4-C2-ANXA1	CD4-C3-GNLY	CD4-C4-CD69	CD4-C5-EOMES	CD4-C6-GZMA	CD4-C7-CXCL13		CD4-C9-CTLA4(TNFRSF9-)	CD4-C9-CTLA4(TNFRSF9+)
Gene Symbol	CCR7	IL7R	FGFBP2	GZMK	ZNF683	HAVCR2		CCR7	LTB	NKG7	FOS	GZMK	CXCR6	CXCL13		CXCR4	TNFRSF9
	SELL	CD28	CX3CR1	CCL4L1	CAPG	SIRPG		RPS6	KLF2	GZMH	CD69	GZMA	HLA-DRB5	SRGN		RARRES3	IL1R2
	LEF1	LYAR	FCGR3A	ITM2C	ITGA1	GAPDH		SELL	AES	GNLY	DUSP1	CST7	HLA-DRB1	RGS1		TXNIP	CCR8
	TCF7	TNFSF8	ADGRG1	CD74	STK17B	ITGAE		RPL3	BIRC3	PRF1	FOSB	CCL4	HLA-DRB6	GAPDH		RGS1	TNFRSF18
	RPL13	MCUB	PLEK	CCL4	JUN	GZMB		RPL13	GPR183	FGFBP2	CCR6	CCL4L1	ALOX5AP	CTLA4		SYNE2	DNPH1
	RPS6	GPR183	FCGR3B	AOAH	ADAM19	CCL3		EEF1G	RPLP0	GZMB	SLC2A3	CD27	CAPG	TNFRSF18		ZFP36L2	PKM
	TXK	DUSP2	KLRD1	CXCR4	CKLF-CMTM1	TIGIT		TXK	GIMAP7	CCL5	OCIAD2	CCL3L3	LGALS3	DUSP4		ALOX5AP	TNFRSF4
	RPL4	SESN1	S1PR1	DTHD1	CKLF	ENTPD1		RPL32	RPSAP58	TARP	LOC100130476	DTHD1	ADAM19	RBPJ		PYHIN1	SERPINB9
	LDHB	MALAT1	LITAF	CCL3L3	CXCR3	PDCD1		RPL5	GSTK1	CX3CR1	PDCD4	F2R	JAML	NR3C1		GIMAP4	ENTPD1
	NOSIP	EPB41	GZMH	CCL3L1	XCL1	RBPJ		RPS14	ICAM2	KLRG1	NABP1	CD27-AS1	CXCR3	RNF19A		EPB41	DUSP4
	RPL3	ATP2B1	FCRL6	CLDND1	PELO	RGS1		RPL11	TRADD	PLEK		CD74	ITGAE	PDCD1		EVI2B	IL21R-AS1
	EEF1G	CYB561	GNLY	CD44	CTSA	CXCR6		TCF7	RPL17	CTSW		APOBEC3G	HLA-DRA	TIGIT		KIAA1551	LAYN
	RPL32	ZFP36L2	KLRG1	SH2D1A	PLTP	CD63		RPS13	SERINC5	A2M		AOAH	FAM129A	BHLHE40-AS1		FCMR	ICOS
	EEF1A1	IL10RA	NKG7	TRAT1	VIM	SAMSN1		RPS4X	SORL1	ADGRG1		CCL3L1	CD2	TNFRSF4		FKBP5	VDR
	RPL5	HELB	S1PR5	EOMES	PLP2	CD82		LEF1	NOP53	FCRL6		EOMES	ANXA2	TOX		CD69	PARK7
	LDLRAP1	PATJ	PRF1	CCL5	SUSD3	CCND2		RPL19	PTGER2	ZEB2		APOBEC3D	HLA-DQB1	ITM2A		GIMAP1-GIMAP5	IL21R
	RPL19	UPP1	PLAC8	F2R	CD69	ENTPD1-AS1		PRKCQ-AS1	ADD3	HLA-DPB1		PVRIG	SH3BGRL3	SNX9			CCND2
	SERINC5	JUNB	A2M	TC2N	GLUL	HLA-DRA		RPL18	RNASET2	LITAF		DUSP2	CKLF	CDK6			TRAF1
	LRRC75A-AS1	PTGER2	ZEB2	FAM102A	S100A11	FKBP1A-SDCBP2		RPL31	FLT3LG	PLAC8		WNK1	CKLF-CMTM1	SLA			MIR4632
	RPS4X	MYBL1	FGR	PVRIG	ZYX	COTL1		RPS12	RASA3	MYOM2		PRR5L	ANXA2P2	DNPH1			LGALS1
	MYC	CLUHP3	PXN	PDE4DIP	CISH	TOX		LINC00861	GIMAP1-GIMAP5	PATL2		CLDND1	CD99	CD82			NAMPT
	RPL11	S100A10	CST7	CMC1	XCL2	GZMA		SNORA33	GIMAP5	S1PR1		HNRNPLL	CLIC1	SIRPG			BIRC3
	RPS13		EFHD2	CRTAM	SOCS1	TNFRSF9		RPS3A	IL7R	PZP		DENND2D	JUN	ITPR1			MAP2K3
	RPL31		PRSS23	NEK7	PFKFB3	MIR155HG		RPL4	CRIP2	SAMD3		CMC1	VIM	TPI1			BATF
	RPS18		KLF2	EPHA1	FAM129A	FKBP1A		RPS14P3	PLSCR3	FLNA		PTPRCAP	PTGER4	FKBP5			BCL2L1
	EEF1B2		TGFBR3	WIPF1	SMG1P3	TPI1		RPL30	C16orf54	S1PR5		HSPA1B	TMEM173	IQGAP1			GRINA
	RPL34		SYNE1	MS4A1	SLC7A5P2	KLRC1		RPLP2	TESPA1	SYNE1		CYTOR	ACTN4	PKM			GCNT1
	PRKCQ-AS1		FLNA	CD84	SKIL	APOBEC3G		EEF1A1	DGKA	MYO1F		ITM2C	ANXA1	YWHAQ			LAIR2
	RPS12		BIN2		PTGER4	CTSD		RPS18	PRR29	EFHD2		CCR5	LINC00892	MYO7A			PIM3
	RPS14		PATL2		GCHFR	CXCL13		RPS23	IL6R	HLA-DPA1		LOC643733	C15orf53	SAMSN1			NME1-NME2
	SNORA33		LILRB1		PLXDC1	IFNG		NOSIP	MAP3K1	RAP1B		PILRB	LCP1	SLC4A5			TNFRSF1B
	RIPOR2		TBX21		BTG1	DUSP4		RPL34	CDC14A	HOPX		SLF1	RUNX2	FKBP1A-SDCBP2			HSPB1
	RPS23		TARP		GOLGA8A	APOBEC3C		FCMR	TMEM256-PLSCR3	PXN		CRTAM	CTSH	PTPN7			IL4R
	RPS5		MYO1F		USP20	LYST		RPS5	TMEM123	ADRB2		WIPF1	IFI44	FKBP1A			HSPA5
	LRRC75A		ITGB2		PLEC	GPR25		LDLRAP1	LPAR6	RASSF1		SAMD9L	PLP2	LYST			BST2
	RPL14		UCP2			CD7		RPL13A	ARHGAP15	SLAMF7		GRK2	ADGRE5	EPSTI1			CST7
	RPL18		C1orf21			FASLG		RPS27A	CD28	GLUL		PDE4DIP	CD63	BST2			PHLDA1
	TRABD2A		PYHIN1			ACP5		RPL14	INPP4B	CTSC		TC2N	CD96	ZBED2			APOBEC3G
	RPLP0		SPON2			APOBEC3F		RPL10A	PIM2	ID2		RARRES3	CD58	MT1A			NDUFB2
	TMEM123		PZP			BST2		EEF1B2	GALT	PYHIN1		FAM102A	TXN	RHOC			SYNGR2
	RPS9		ADRB2			PAG1		RPL8	TAGAP	TBX21		ATP8A1	LAPTM5	SMARCA2			SDC4
	RPL13A		PXN-AS1			HLA-DRB5		RPS9	TTC39C	C12orf75		GPR174	ATP2B4	MTHFD2			SLC25A3
	PABPC1		LAIR2			PARK7		RIPOR2	STK38	ABI3		RNF213	CCL20	MT2A			LDHA
	ABLIM1		ITGAL			SRGAP3		RPS25	AQP3	RUNX3		KIAA1551	ANKRD28	CTSD			IL2RA
	RPS3		APMAP			HLA-DRB6		RPL27A	THEM4	SLC9A3R1		HSPA1A	ARHGAP18	ICOS			TXN
	MAL		CTSW			KRT81		RPS20	LIME1	LGALS1			LMNA	BHLHE40			FKBP1A-SDCBP2
	TPT1		HLA-C			CD27-AS1		RPS8	GIMAP4	TGFBR3			TYMP	BTLA			CTNNB1
	RPLP2		TTC38			CD27		RPS16	FXYD5	ITGB1			CD40LG	NFATC2			ATP5G3
	RPL10A		FCRL3			LAG3		LRRC75A	HINT1	LYAR			GPR171	TFRC			DYNC1I2
	DGKA		EMP3			KRT86		RPL29	COMMD6	HCST			ACTG1	LIMS1			ZBTB32
	RPL12		ADD3			TNFRSF1B		RPL10	FAAH2	BIN2			PDE4B	NAP1L4			SH2D2A
	RPLP1		ZEB2-AS1			ALOX5AP		RPL37	PI16	PTPN4			ZFP36	OAS3			TXNDC17
	RPS14P3		RAP1B			PHLDA1		RPL12	NDUFB9	GPR65			MIR4435-2HG	TNFAIP3			PTPN1
	RPS20		CYTH1			MX1		SATB1	SAMHD1	ITGB2			SLAMF1	ENTPD1			EFHD2
	RPL30		RASSF1			IFI6		RPL35A	PATJ	SPN			LCP2	SRGAP3			IL1R1
	RPS3A		TPST2			HLA-DRB1		RPS15A	RPL17-C18orf32	APMAP			GPR25	APOBEC3C			CREM
	RPL10		MTSS1			PTPN7		LRRC75A-AS1	ODF2L	ITGAL			HLA-DQB2	BATF			COX5A
	RPL8		TSPAN32			MIR155		MYC	PBXIP1	PIP4K2A			PPP3CA	CD7			CALR
	NPM1		RAP2B			IVNS1ABP		RPS10	CA5B	ITGAM			SKIL	SH2D2A			ATP6V1C2
	RPL37		RASA3			MIR4632		IL6ST	IL2RA	LAIR2			MKNK1	GNG5			PDIA6
	RPS19		ITGAM			ITM2A		NPM1	NME2	MIAT			ATP1B1	PDE4D			CD177
	RPL36		MYO1G			MYO7A		RPL22	VSIR	PAXX			GLIPR2	SUSD6			TFRC
	RPSAP58		CD47			GALNT2		RPL6	MIF-AS1	DIP2A			REEP5	SEM1			PRF1
	FOXP1		C12orf75			PKM		RPL23	MIF	PXN-AS1			S100A6	MAF			CXCR6
	RPL29		SAMD3			HLA-DQB1		LDHB	CBLL1	TPST2			LSP1	VMP1			GNG5
	RPS21		RAP1GAP2			ANXA5		CD55	CORO7	MIR3615			SEL1L3	AHR			HSP90AB1
	SATB1		MYOM2			TNIP3		MAL	SVIL	ZEB2-AS1			MIR4632	GALNT2			TYMP
	RPS10		PFN1			AHR		RPL37A	ZGPAT	CD300A			PERP	SLC1A5			CRADD
	RPS25		SPN			KLRC2		RPL36	MIR5047	TRG-AS1			ELOVL5	ANXA5			VDAC1
	NELL2		ITGA4			RAB27A		RPL15	BTF3	S100A4			S100A11	MIR497HG			DUSP2
	RPL37A		SLC9A3R1			HLA-DMA		RPS10-NUDT3		GZMM			CD44	FAM53B			HM13
	RPS2		LPCAT1			IDH2		RPS2		CD320			TNFSF14	NDFIP2			FMNL1
	RPS16		USP28			FUT8		RPS19		DSTN			UBC	PLSCR1			FKBP1A
	RPL22		SH3BP5			PLSCR1		RPL7A		PFN1			PELO	TIAM1			PSMD11
	CD55		CD99			ID2		ABLIM1		TSPAN32			PBX4	PRKAR1A			DYNLL1
	TXNIP		SLC44A2			IL2RB		RPS15		IRF1			SLC5A3	WARS			YWHAQ
	RACK1		SLAMF7			PTPN22		RPS21		IL10RA			AKIRIN2	PGAM1			APOBEC3C
	RPS27A		PTP4A2			ISG15		RACK1		SYTL3			PLIN2	IL2RB			ACSL4
	LOC100289511		CCND3			RIN3		TRABD2A		LINC00612			SLA2	MX1			LAPTM4B
	RPL15		RAB29			CD8A		FOXP1		PTGDR			EMB	EED			LGALS3
	RPL6		PIK3R5			LGALS3		RPL38		CALM1			TSEN54	CHN1			ENTPD1-AS1
	NDFIP1		CEP78			IGFLR1		LOC100289511		EHD1			TBCD	WDR83OS			SELENOK
	RPS29		ARHGAP25			PTTG1		RPL23A		MYO1G			MAP4K1	PARK7			REL
	FCMR		RAB37			PGK1		RPS11		TOB1			B3GNTL1	AGFG1			SLC7A5
	RPSA		SH3BP5-AS1			HLA-DPA1		RPL24		PRSS23			CLIC5	OASL			SMS
	ACTN1		OSBPL5			SNRPB		RPS7		GNG2			DHRS3	NCF4			SEC61B
	PIK3IP1		LINC00612			OASL		FTL		ARL4C			GAB3	PAM			PSMC3
	RPS8		CYBA			LDHA		RPL27		CHST12			CD53	CTSB			RBM8A
	RPL24		SUN2			NDFIP2		FAU		EMP3			RASAL3	IFI6			NEDD9
	RPL35A		PLEKHG3			ARHGAP9		ACTN1		CD52			IDI1	NPDC1			CDK6
	GAS5		SYTL1			SLA		RPS29		CYTH4			TNF	PTPN13			TRAPPC4
	THEM4		TTC16			IFI44		ATM		PRMT2			ANTXR2	LASP1			RBBP7
	ATM		LOC100130872			APOBEC3D		RPL39		CD3G			KLF6	C9orf16			IL2RB
	RPL23		CYTH4			LINC00299		RPL26		CD47			CALHM2	NAB1			NME2
	RPS10-NUDT3		PRKCB			HMGN1		GAS5-AS1		SPON2			DUSP6	IL21R			SYTL3
	FLT3LG		VCL			LSP1		UBA52		PARP8			S100A10	ARPC2			LMNA
	SRSF5		ITGB1			SEM1		RPS27		PTP4A2			IDS	IFI16			TPM4
	PIM2		CD52			PDIA6		TXNIP		CDC42EP3			GOLGA8B	LRMP			OTUD5
	SNHG8		DOK2			IFI44L		RPL35		GSTP1				CFLAR			SNX9
	RPL27A		DIP2A			DNPH1		RPS24		ZNF683				EZR			TNFRSF8
	RPL38		PTPN4			SIT1		RPL18A		FGR				RGS2			PAM
	IL6ST		KLRF1			BLOC1S1-RDH5		APBA2		IFITM2				NFKBIA			RUNX3
	GAS5-AS1					RUNX2		EEF1D		BTN3A2				EPS15			SOD1
	RPS24					IFI27L2		TPT1		PPP1CA				TOX2			ILF2
	RPS15A					IKZF3		LEF1-AS1		CAPN2				CBLB			NDUFA12
	LINC00861					BLOC1S1		RPLP1		AHNAK				CDV3			RBM3
	RPL39					RHOA		GAS5		C5orf56				CORO1C			CTSC
	RPL28					CALM3		TAPT1-AS1		MYBL1				STAT3			FNDC3B
	SARAF					PARP9		NDFIP1		ARHGAP25				EZR-AS1			TUBA1B
	RPS7					MYO1E		PIK3IP1		RAB29				PDIA6			LRRC61
	TESPA1					RANBP1		PABPC1		STOM				PHTF2			TNFAIP3
	RPL27					OAS1		EPHX2		SELPLG				PSMD8			SNRPC
	RASGRP2					ATP10D		FHIT		SIGIRR				SCO2			ACADVL
	LINC01550					FIBP		RASGRP2		RAD9A				GALM			GSTO1
	RPS11					SURF4		RPSA		C1orf21				COTL1			SMARCE1
	RPL26					IFI35		TOMM7		ARRDC3				PTPN1			LINC00963
	GIMAP7					CTLA4		SRSF5		CCDC88C				CORO1B			PTTG1
	RSL1D1					CYTOR		LINC01550		SASH3				CFLAR-AS1			RANBP1
	OXNAD1					TBCD		SARAF		CCND3				ATP5J2			YWHAE
	LIMD2					FBXO10		BACH2		SPG11				CALM3			CD82
	SORL1					ASXL2		NUCB2		SH3BP5				TMEM64			ATP1B3
	UBA52					TRAF5		RPL28		MSN				MOB1A			TUBB
	FAU					CD96		OXNAD1		TNFRSF1B				CCDC6			PPA1
	RPS15					MIR497HG		ANKRD55		BTN3A1				TPM4			SCO2
	PDE3B					SLA2		LIMD2		UTRN				PGK1			LY75-CD302
	EIF2S3					PTBP1		PCED1B-AS1		THEMIS				NEDD9			U2AF1
	EIF3E					ATP6V1C2		C6orf48		DOK2				OAS1			F5
	RPL7A					EPSTI1		CDC42SE1		RNF166				IGFLR1			P4HB
	RPL35					HNRNPLL		CCDC18-AS1		VCL				PPM1M			CCT3
	C6orf48					SH3BGRL3		PFDN5		PPP2R2B				TRAF5			SPCS1
	AES					GNG5		CAMK4		ITGB7				HIF1A			RHOC
	EEF2					SYNGR2		NACA						ZC2HC1A			PGK1
	RPL17					CDK6		RPL9						SARDH			KCNN4
	RGS10					CBLB		C1orf56						ACADVL			STIP1
	HAPLN3					ADGRE5		EIF3E						PAG1			PSMB1
	C1orf162					FABP5		PRKCA						TANK			MAT2A
	HNRNPA1					VDAC1		TSHZ2						POMP			SNRPD3
	LEF1-AS1					PRDX5		EIF3L						VCP			TRAF3
	PPP1R2					SEL1L3		TMEM204						MIR155HG			SURF4
	SLC7A6					COX5A		PCED1B						IL4R			SPN
	NACA					SRGN		EEF2						C5orf58			PRDX5
	PFDN5					GALNT1		SESN1						IRF5			CD83
	NAA16					LY6E		EIF2S3						DBI			NSF
	FBXO32					PLPP1		MLLT3						SEC61B			EBI3
	RPL23A					IFI16		EPB41						SYT11			MYO1G
	BACH2					SARDH		SNHG8						CTSL			LY75
	RPS27					POMP		TMEM63A						TMEM167A			SLC3A2
	RASGRF2					R3HDM1		TTC3						AGFG2			TMED10
	ICAM2					USP18		BTG1						ISG15			ARF4
	TMEM131L					PRKAR1A		PDK1						LGALS9			FOSL2
	SNHG6					CD2		TMC8						DYNLL1			PSMA2
	CAMK4					EZR-AS1		PDE3B						ADCY3			GBP2
	TMEM243					YARS		KLF3-AS1						SEC11A			PRDX3
	GPR155					DYNLL1		TMEM131L						APOBEC3F			CD63
	EEF1D					SMC4		LUC7L3						PFKFB3			ATP13A3
	ST6GAL1					C5orf58		RGS10						PSTPIP1			GADD45A
	TNRC6B					PARVG		EIF3H						SURF4			CTLA4
	TMEM63A					OAS2		MCUB						RNF115			HADHB
	NSUN5P2					SP140		COX4I1						LDLRAD4			ANXA6
	SPTBN1					PDE4D		FBL						RHOA			GRSF1
	NUCB2					UBE2A		RSL1D1						PTTG1			FUBP1
	LINC02067					CHST12		SNHG5						SLC4A7			HNRNPR
	FTL					SUPT3H		SMDT1						CPD			RAN
	SNHG5					HSPB1		CEACAM21						BSG			ZBED2
	PASK					RSAD2		OPRM1						RBM8A			APLP2
	MCMDC2					GALM		C1orf162						WDR83			RAB1A
	LEPROTL1					RHOC		GLG1						NDUFB3			LTA
	STK38					LCP2		IPCEF1						PLEKHO2			EED
	RCAN3					B3GNTL1		TTN						ELMO1			ATP5O
	PCED1B					ABCA2		ADTRP						IL2RG			LASP1
	NIPAL3					EIF2AK2		GIMAP1						LINC01281			HSPD1
	TOMM7					UBE2L6		RCAN3						ARAP2			ADORA2A
	PNISR					LOC606724		SESN3						LDHA			STAT3
	NOP53					GPI		NFKBIZ						FUT8			IGFLR1
	NAP1L1					EWSR1		MDM4						CAMK1			ATP6V0E1
	PDK1					CTSC		ARHGAP45						LRRC8D			PSMD8
	EIF3L					ATP5G3		EIF3F						NUDT21			NME1
	TRAF3IP3					DTX3L		SPTBN1						RNASEK-C17orf49			CSNK2B
	RNF138					DRAP1		BEX3						ATP6V1C2			SPECC1L
	MAPKAPK5-AS1					RGS2		NSUN5P2						SDF4			DPYSL2
	PRMT2					GBP2		SF1						ARPP19			PRDX2
	C1orf228					NAPA		DPH5						PSMB3			COMT
	BTF3					RAB3GAP1		TRAF3IP3						VOPP1			TET2
	PCED1B-AS1					SUB1		PNISR						PROSER1			MLF2
	SRSF6					LAP3		ITGA6						COPE			PSMA4
	LGALS3BP					SRRT		HNRNPA1						LAP3			ID3
	LUC7L3					ABI3		ST13						PRDM1			NUDT5
	ITGA6					KLRC3		ARHGEF18						SEC14L1			MRPS6
	SLC12A7					HMGN2								HNRNPL			PTP4A3
	HSP90AB1					TCIRG1								TXNDC17			PMVK
	ANP32B					GPANK1								VDR			LY6G5B
	DPH5					STAT3								HOMER3			CCR6
	PRR29					DDX60								ZNF410			ID2
	CASP6					PAM								GPI			HAPLN3
	IL6R					HM13								MLF2			NR4A1
	MLXIP					TTN								BUD31			SAR1B
	STX16					PLA2G16								SRI			OSTC
	ZFAS1					CORO1A								ECH1			HAVCR2
	C1orf56					C7orf25								FAM118A			CTNNA1
	EPHX2					XAF1								THADA			ASB2
	CUL9					ACTR3								COX7B			HSP90B1
	MKRN1					PSMA1								RHBDD2			DNAJA2
	GIMAP1-GIMAP5					2018-09-02								OGG1			RNH1
	PRKCA					PTPN6								CCDC50			PPP2R1A
	CHMP7					SKIV2L2								CD59			GNL2
	CDC42SE1					SUSD6								RAPGEF1			ANXA7
	MFNG					PSMA2								SH2D1A			MVP
	ARHGAP15					NUDT5								VDAC1			ARPP19
	APEX1					MCL1								ATP5J2-PTCD1			CYCS
	STMN3					AP4B1-AS1								MIIP			MRPL3
	GIMAP5					RAB1B								MAPKAPK3			LYST
	CRTC3					TMPO								COMMD3			POU2F2
	CIAPIN1					TPM4								CALR			SELENOT
	DSEL					PRDX3								EDARADD			RAB5A
	NPAT					RNASEK-C17orf49								INPP1			EMC7
	SMDT1					POLG								YWHAE			GOT2
	ATP6V1G1					ZNF48								PPP2R5D			TPMT
	PLSCR3					UTS2								ENO1			MRFAP1
	LSR					PPP5C								ABHD2			CCL22
	PYCR2					DENND1B								HSBP1			PSMC2
	EIF4B					KIF5B								AP2S1			RTRAF
	SELENOH					MRPL51								TRPT1			WARS
	SF1					OAS3								HMGN1			PHB2
	TMEM256-PLSCR3					S100PBP								ARL6IP1			PSMD6
	HINT1					WNK1								UCP2			UBE2N
	RAPGEF6					NOP10								CLPP			CCT6A
	GPX1					RALY								RFX5			CXCR3
	GNL3					TBL1XR1								CD84			AHSA1
	ST13					SNAP47								SS18			CD59
	CDK5RAP3					PTMS								PTPN22			CMTM6
	LEFTY1					LAYN								NDUFV2			HNRNPM
	SNURF					CRIM1								MICAL2			MBOAT7
	2018-09-06					CLIC1								CHKB-CPT1B			ACTR1A
	FYB1					2018-09-01								RAB27A			BUD31
	PGGHG					CLIC3								LRRC8B			BAK1
	ST3GAL1					UBE2D2								PRDX1			CEACAM1
	TMEM204					HLA-DQA1								NFKB1			CCT2
	CNST					TNFSF10								RPA3			DNAJA1
	MGAT4A					PSME2								DHX15			SEC11C
	SAMHD1					BHLHE40								EFTUD2			ITPA
	ESYT2					HLA-DQA2								PLPP1			SLC16A1
	RIC3					CAPZB								PTK2B			EPHX2
	UXS1					GTF2I								NFAT5			CCT5
	PSIP1					HSPA1B								NDUFA6			PTPN6
	CEACAM21					VCP								MYL6			PDHB
	COX4I1					TANK								MFSD6			IL18R1
	ATXN7					ACTN4								CHMP5			NINJ1
	BIRC3					HDLBP								SUMO2			HTATIP2
	FXYD5					RNF19A								SMS			CD79B
	ADPRM					UBASH3B								UBE2L6			MZB1
	EIF3F					GNPTAB								TRPS1			CCDC47
	CARD10					COX8A								COMMD4			ACOT9
	POM121					CBX3								SNX14			ERCC1
	TPP2					GBP1								SFXN1			PSMD13
	MSL3					GCNT1								NBN			PSMD2
	SGTB					MGAT1								CHKB			TMED9
	TOB1					TBC1D4								UBB			COPS6
	NBDY					ANP32A								ARNTL			ATP6AP2
	DOCK10					TLN1								FYN			LMAN2
	FBL					SGMS1								PTCD1			YIF1A
	LRRN3					NASP								PTPN11			BEX3
	MIR5047					IFIT1								ZNF267			FDPS
	DMAC1					HLA-DQB2								IL21R-AS1			CDKN1A
	SDR39U1					SEC61A2								SSR3			HSD17B10
	CCDC18-AS1					KHDRBS1								FAS			CD2BP2
	U2AF1L4					CMTM6								AK2			LMCD1
	CA6					TOMM5								MIR155			MRPL4
	FAM107B					AGO2								PRKCH
	CLNS1A					PDIA3								PRDX3
	TRAPPC6A					SUMO2								NDUFB2-AS1
	MDN1					ARL6IP1								STAT4
	BEX3					PSMD8								ICA1
	SLC25A45					EZR								GLCCI1
	CTC1					DEK								SYNGR2
	TRNT1					ARPC2								ARL3
	EIF4A2					STAT1								TYK2
	GTF3A					SLC7A5								MAP2K3
	COX6C					IL4R								PDAP1
	CARS					ABRACL								MFSD10
	GLG1					NAB1								NDUFS8
	DARS					TFRC								KIAA0319L
	PLEKHB1					PDIA3P1								TBL1XR1
	ATP5L					MFSD6								ATP5G3
	ARGLU1					ATP8B4								CD2BP2
	SNRK					HMGB2								SLC25A5
	HSPD1					BCL2L11								TRIM13
	SCML4					MAD2L2								DRAP1
	CD8B					ECE1								RTFDC1
	PRDX2					ZBTB25								ARHGAP9
	ARHGAP45					NEDD9								NCKAP1L
	NSMCE1					GGA2								PCNX2
	UBQLN2					PSMB3								KLF7
	LARS					SH2D2A								PFKP
	LIMK2					NDUFB3								CTNNB1
	UXT					ATP5C1								ATP5J
	ANAPC1P1					H2AFZ								HAVCR2
	AIF1					GATC								IKZF3
	NCL					CD164								COX8A
	MTERF4					CD2BP2								KDM5B
	ANAPC16					IRF9								PSMD13
	LINC01089					CATSPER2P1								LRBA
	UBE2G2					CMPK2								LUC7L2
	EBLN3P					CARHSP1								RANBP1
	C4orf3					VPS26A								FIBP
	EIF5A					ADCY3								CLASP1
						CNP								POLR2K
						SLF1								SLC7A5
						AP2M1								STMP1
						GPR174								POR
						NDUFS8								DPF2
						TNFSF4								JARID2
						CALCOCO2								AKAP13
						CMC2								FKBP8
						MT1A								RABGAP1L
						PPP1CA								WDR1
						SNX14								SNX5
						MAST4								GNA15
						CSNK2B								GNAI2
						QSOX1								PPP4C
						SLC25A5								ANP32E
						RAD9A								RAB11FIP1
						LY6G5B								PSMA1
						ATXN1								PSMA6
						CENPN								MCM5
						RTRAF								TRAF3
						NDUFB11								RNF14
						ANP32E								IFI35
						COPB1								NDUFS6
						PSMA4								YARS
						RPA3								FAM96B
						YWHAE								VPS25
						CDK2AP2								BRK1
						DEF6								SLAIN2
						SLC1A5								SUMO1
						CDV3								IMMT
						TNFRSF18								CDK2AP2
						KIAA1671								LPCAT3
						RNF31								PSMC3
						SNX9								C7orf55-LUC7L2
						ANAPC11								PSMB8
						WDR1								NDUFC2-KCTD14
						MT2A								DNM2
						SCAMP2								CD226
						PRDX6								GBP2
						ITGB7								SELENOT
						UBR7								SPPL2A
						LASP1								TRAFD1
						NAPA-AS1								DNAJC8
						CLSTN3								RAN
						CD101								ISCU
						PARP10								PSME2
						SRSF9								CAND1
						C20orf24								MRPL51
						VMP1								EIF4G1
						MCM5								TP53INP1
						GFI1								DR1
						SLC38A2								ACTA2
						HIF1A								SNTB2
						ATP1B3								CHMP2A
						TGIF2-C20orf24								PTPN2
						MCM2								KLRB1
						ETFB								SYNC
						PSMB2								PPP1R16B
						CSF1								SAMD9
						ARF6								CDC123
						DYNLRB1								ATXN1
						SUMO1P3								ANXA7
						CALR								MAP4
						RBBP4								MIS18BP1
						ICOS								BCL6
						FSCN3								PPP2R1A
						UBXN4								PHPT1
						PRKAR1B								ATP1B3
						HNRNPM								CLTA
						PLEKHF1								CCDC167
						HNRNPF								FBXO10
						RBX1								ARID1A
						SYNC								PSMA4
						PPP1CC								BNIP3L
						ATP5B								PSME3
						ARNT								ATPIF1
						IQGAP1								TRIP12
						SENP3-EIF4A1								NDUFC2
						CSNK1G1								MRPL27
						GSTO1								MDH1
						ARPC4								PSMD1
						NAP1L4								TBK1
						CAPZA1								ANAPC11
						PSMB8								FARSA
						CSGALNACT1								UQCRH
						MAP2K2								HSD17B10
						IRF7								HNRNPA2B1
						RAC2								LAMTOR5
						HLA-DPB1								AHI1
						HOMER3								QSOX1
						CHST11								SKIV2L2
						ENO1								COMMD3-BMI1
						C9orf16								MRPL28
						TSPAN14								RPS6KA1
														HIGD1A
														C7orf25
														CERS5
														SIPA1L1
														FBLN7
														RPN1
														SUB1
														TPM3
														SQOR
														PSMA2
														UBE2N
														SPOCK2
														ACTR3
														CENPN
														IRF7
														FANCL
														SMCO4
														SNRPB
														HNRNPU
														TMEM243
														SND1
														STPG4
														CHST11
														IL10RB
														EIF4G2
														ARPC1B
														NELFE
														KIAA1324
														HIF1A-AS2
														CALM2
														ATP5B
														PHLDA1
														HERPUD1
														AP3S1
														HSPB1
														TAP1
														CAPZB
														DGKH
														SOD1
														GNA13
														RTCA
														PSMB6
														HNRNPD
														C17orf62
														TADA3
														TSTA3
														PPP1CC
														CREM
														GOLPH3
														RBBP4
														PSMD9
														GPAA1
														SERTAD2
														ILF2
														MAT2B
														PDS5A
														CYTIP
														MEAF6
														PMF1-BGLAP

## Sheet: Hypoxia Signatures
Boffa/Eustace et al 26 genes Hypoxia signature	Yang et al. 24 genes Hypoxia signature
ALDOA	ENO2
ANGPTL4	SLC2A1
ANLN	BNIP3
BNC1	PDK1
C20orf20	NDRG1
CA9	PFKFB4
CDKN3	FAM162A
COL4A6	VEGFA
DCBLD1	ZNF395
ENO1	DDIT4
FAM83B	ANKRD37
FOSL1	MXI1
GNAI1	SLC2A3
HIG2	PPFIA4
KCTD11	GBE1
KRT17	ALDOC
LDHA	CDK18
MPRS17	ANG
P4HA1	PRSS53
PGAM1	INSIG2
PGK1	VLDLR
SDC1	P4HA1
SLC16A1	BNIP3L
SLC2A1	BHLHE40
TPI1
VEGFA
