# Supplementary material for: Sex-based dimorphism of anticancer immune response and molecular mechanisms of immune evasion
Source: Clin Cancer Res. Author manuscript; Available in PMC 2021 Aug 4. (PMC7611463; doi:10.1158/1078-0432.CCR-21-0136)
Supplement: supplementary table 2 [file EMS127617-supplement-supplementary_table_2.xlsx]

## Sheet: Risultati_GO_IMMUNE_META_5917GS
GSID	GSLABEL	Number of genes	ES	NES	I_pvalue	raw_p	FDR	Enriched sex (women= 1 and men=0)
2560	GO_INTERFERON_GAMMA_MEDIATED_SIGNALING_PATHWAY	70	0.763146	3.14269	0	0	0	1
1590	GO_CELLULAR_RESPONSE_TO_INTERFERON_GAMMA	122	0.650316	2.93585	0	0	0	1
3354	GO_RESPONSE_TO_INTERFERON_GAMMA	144	0.622416	2.89729	0	0	0	1
4518	GO_MHC_PROTEIN_COMPLEX	27	0.866509	2.88545	0	0	0	1
4900	GO_MHC_CLASS_II_PROTEIN_COMPLEX	16	0.93063	2.71541	0	0	0	1
668	GO_RESPONSE_TO_TYPE_I_INTERFERON	68	0.669396	2.70945	4	0.004	0.0193682	1
5795	GO_CYTOKINE_RECEPTOR_ACTIVITY	89	0.617737	2.66326	0	0	0	1
4908	GO_EXTERNAL_SIDE_OF_PLASMA_MEMBRANE	238	0.543061	2.65037	0	0	0	1
4792	GO_SIDE_OF_MEMBRANE	428	0.501465	2.64925	0	0	0	1
2781	GO_IMMUNE_RESPONSE	1100	0.465503	2.61203	0	0	0	1
4571	GO_LUMENAL_SIDE_OF_MEMBRANE	33	0.738762	2.57395	0	0	0	1
3021	GO_POSITIVE_REGULATION_OF_CELL_CELL_ADHESION	243	0.506804	2.55205	0	0	0	1
3041	GO_REGULATION_OF_HOMOTYPIC_CELL_CELL_ADHESION	307	0.494722	2.54336	0	0	0	1
42	GO_REGULATION_OF_CELL_ACTIVATION	484	0.475931	2.54161	13	0.013	0.0454079	1
2240	GO_REGULATION_OF_T_CELL_PROLIFERATION	147	0.54218	2.53607	0	0	0	1
2030	GO_INNATE_IMMUNE_RESPONSE	619	0.46958	2.53456	0	0	0	1
1000	GO_REGULATION_OF_IMMUNE_RESPONSE	858	0.456331	2.53426	32	0.032	0.0877405	1
635	GO_LYMPHOCYTE_COSTIMULATION	78	0.605596	2.53355	1	0.001	0.00688824	1
4050	GO_REGULATION_OF_CELL_KILLING	63	0.622724	2.53115	0	0	0	1
2145	GO_POSITIVE_REGULATION_OF_CELL_ACTIVATION	311	0.497261	2.52924	0	0	0	1
2460	GO_ADAPTIVE_IMMUNE_RESPONSE	288	0.503314	2.50999	0	0	0	1
5747	GO_ANTIGEN_BINDING	114	0.584181	2.5075	0	0	0	1
108	GO_REGULATION_OF_LEUKOCYTE_PROLIFERATION	206	0.516393	2.50052	8	0.008	0.0319622	1
251	GO_REGULATION_OF_CALCIUM_MEDIATED_SIGNALING	76	0.596274	2.48522	2	0.002	0.0116821	1
2975	GO_LEUKOCYTE_CELL_CELL_ADHESION	255	0.498699	2.48005	0	0	0	1
1332	GO_REGULATION_OF_LEUKOCYTE_MEDIATED_CYTOTOXICITY	53	0.637466	2.47092	0	0	0	1
861	GO_POSITIVE_REGULATION_OF_T_CELL_PROLIFERATION	95	0.572974	2.46921	3	0.003	0.0157787	1
4639	GO_ENDOCYTIC_VESICLE_MEMBRANE	152	0.529342	2.46718	0	0	0	1
2916	GO_REGULATION_OF_LEUKOCYTE_MEDIATED_IMMUNITY	156	0.516311	2.45442	0	0	0	1
5508	GO_PEPTIDE_ANTIGEN_BINDING	31	0.705823	2.44403	0	0	0	1
2778	GO_REGULATION_OF_CELL_CELL_ADHESION	380	0.468757	2.44251	0	0	0	1
2415	GO_REGULATION_OF_CYTOKINE_SECRETION	149	0.528651	2.44076	0	0	0	1
55	GO_LEUKOCYTE_ACTIVATION	414	0.464949	2.43616	16	0.016	0.0523628	1
4543	GO_ENDOCYTIC_VESICLE	256	0.482697	2.41854	0	0	0	1
4673	GO_CLATHRIN_COATED_ENDOCYTIC_VESICLE	65	0.597076	2.41707	0	0	0	1
1218	GO_POSITIVE_REGULATION_OF_LEUKOCYTE_PROLIFERATION	136	0.53206	2.41236	0	0	0	1
4446	GO_PHAGOCYTIC_VESICLE	86	0.565277	2.40389	0	0	0	1
1586	GO_POSITIVE_REGULATION_OF_INTERLEUKIN_12_PRODUCTION	33	0.686077	2.4024	0	0	0	1
1565	GO_LYMPHOCYTE_ACTIVATION	342	0.46683	2.40028	0	0	0	1
4949	GO_CLATHRIN_COATED_ENDOCYTIC_VESICLE_MEMBRANE	48	0.626307	2.38685	0	0	0	1
2374	GO_POSITIVE_REGULATION_OF_PHAGOCYTOSIS	46	0.621412	2.36634	0	0	0	1
869	GO_CELL_ACTIVATION	568	0.437795	2.35679	21	0.021	0.0639511	1
1810	GO_POSITIVE_REGULATION_OF_CELL_ADHESION	376	0.453264	2.35333	0	0	0	1
4795	GO_CLATHRIN_COATED_VESICLE_MEMBRANE	81	0.558392	2.35138	0	0	0	1
3819	GO_POSITIVE_REGULATION_OF_IMMUNE_RESPONSE	563	0.437564	2.3467	0	0	0	1
5041	GO_CYTOKINE_BINDING	92	0.545244	2.34383	0	0	0	1
1419	GO_LEUKOCYTE_MIGRATION	259	0.46406	2.34337	0	0	0	1
4040	GO_REGULATION_OF_ALPHA_BETA_T_CELL_PROLIFERATION	23	0.725661	2.34079	0	0	0	1
3593	GO_NEGATIVE_REGULATION_OF_IMMUNE_RESPONSE	121	0.516566	2.33967	0	0	0	1
519	GO_NEGATIVE_REGULATION_OF_LEUKOCYTE_MEDIATED_IMMUNITY	47	0.628032	2.33312	0	0	0	1
5049	GO_BETA_2_MICROGLOBULIN_BINDING	11	0.879041	2.33214	0	0	0	1
2221	GO_REGULATION_OF_IMMUNE_SYSTEM_PROCESS	1403	0.405746	2.32949	0	0	0	1
4392	GO_IMMUNE_EFFECTOR_PROCESS	486	0.441797	2.32583	0	0	0	1
4860	GO_PHAGOCYTIC_VESICLE_MEMBRANE	58	0.585816	2.31843	0	0	0	1
4535	GO_T_CELL_RECEPTOR_COMPLEX	19	0.760059	2.31103	0	0	0	1
190	GO_RESPIRATORY_GASEOUS_EXCHANGE	48	0.597621	2.3059	1	0.001	0.00688824	1
3527	GO_NEGATIVE_REGULATION_OF_IMMUNE_SYSTEM_PROCESS	372	0.441788	2.30456	0	0	0	1
2561	GO_POSITIVE_REGULATION_OF_CYTOKINE_SECRETION	96	0.538783	2.30385	0	0	0	1
1833	GO_POSITIVE_REGULATION_OF_IMMUNE_SYSTEM_PROCESS	867	0.413813	2.29829	0	0	0	1
4881	GO_LYTIC_VACUOLE	526	0.426131	2.29659	0	0	0	1
3236	GO_MYELOID_CELL_ACTIVATION_INVOLVED_IN_IMMUNE_RESPONSE	41	0.633661	2.29579	0	0	0	1
1445	GO_POSITIVE_REGULATION_OF_LEUKOCYTE_DIFFERENTIATION	131	0.503661	2.29492	0	0	0	1
673	GO_CYTOKINE_MEDIATED_SIGNALING_PATHWAY	452	0.431027	2.29408	22	0.022	0.0664492	1
2587	GO_ACTIVATION_OF_IMMUNE_RESPONSE	427	0.439042	2.29225	0	0	0	1
1910	GO_REGULATION_OF_SYNCYTIUM_FORMATION_BY_PLASMA_MEMBRANE_FUSION	25	0.704173	2.28818	0	0	0	1
5226	GO_MHC_CLASS_II_RECEPTOR_ACTIVITY	12	0.876886	2.28555	0	0	0	1
1180	GO_LEUKOCYTE_CHEMOTAXIS	117	0.503037	2.28484	0	0	0	1
267	GO_REGULATION_OF_CYTOKINE_PRODUCTION	563	0.423735	2.28095	26	0.026	0.0748623	1
150	GO_REGULATION_OF_INTERLEUKIN_4_PRODUCTION	31	0.657377	2.28007	3	0.003	0.0157787	1
2618	GO_POSITIVE_REGULATION_OF_LYMPHOCYTE_DIFFERENTIATION	80	0.546281	2.27964	0	0	0	1
4352	GO_REGULATION_OF_INTERLEUKIN_12_PRODUCTION	51	0.598989	2.27638	1	0.001	0.00688824	1
4466	GO_IMMUNOLOGICAL_SYNAPSE	33	0.64301	2.27201	0	0	0	1
1012	GO_LEUKOCYTE_DIFFERENTIATION	292	0.449083	2.26905	0	0	0	1
601	GO_SINGLE_ORGANISM_CELL_ADHESION	459	0.423997	2.26659	16	0.016	0.0523628	1
942	GO_LEUKOTRIENE_BIOSYNTHETIC_PROCESS	23	0.704765	2.26642	2	0.002	0.0116821	1
4581	GO_BASAL_PLASMA_MEMBRANE	33	0.652492	2.26605	0	0	0	1
442	GO_REGULATION_OF_ADAPTIVE_IMMUNE_RESPONSE	123	0.494717	2.26381	4	0.004	0.0193682	1
4585	GO_CLATHRIN_COATED_VESICLE	157	0.483762	2.2552	0	0	0	1
754	GO_DEFENSE_RESPONSE_TO_VIRUS	164	0.473931	2.2545	8	0.008	0.0319622	1
4748	GO_ER_TO_GOLGI_TRANSPORT_VESICLE_MEMBRANE	55	0.573794	2.25369	0	0	0	1
4993	GO_PLASMA_MEMBRANE_PROTEIN_COMPLEX	510	0.418356	2.25231	0	0	0	1
4353	GO_POSITIVE_REGULATION_OF_ALPHA_BETA_T_CELL_ACTIVATION	51	0.58765	2.25177	0	0	0	1
3987	GO_T_CELL_DIFFERENTIATION	123	0.491847	2.24929	0	0	0	1
4681	GO_PHAGOCYTIC_CUP	18	0.745548	2.24807	0	0	0	1
2327	GO_INFLAMMATORY_RESPONSE	454	0.424771	2.24731	0	0	0	1
252	GO_REGULATION_OF_ALPHA_BETA_T_CELL_ACTIVATION	68	0.555903	2.24293	1	0.001	0.00688824	1
3878	GO_NEGATIVE_REGULATION_OF_IMMUNE_EFFECTOR_PROCESS	102	0.508011	2.24086	0	0	0	1
3764	GO_REGULATION_OF_NATURAL_KILLER_CELL_MEDIATED_IMMUNITY	35	0.643065	2.2394	1	0.001	0.00688824	1
307	GO_CELL_CHEMOTAXIS	162	0.474589	2.23645	9	0.009	0.0349429	1
4204	GO_LYMPHOCYTE_DIFFERENTIATION	209	0.456873	2.23548	0	0	0	1
3114	GO_NEGATIVE_REGULATION_OF_CELL_ACTIVATION	158	0.479856	2.23285	0	0	0	1
3585	GO_REGULATION_OF_INTERLEUKIN_1_SECRETION	33	0.627176	2.2291	1	0.001	0.00688824	1
3669	GO_IMMUNE_RESPONSE_REGULATING_CELL_SURFACE_RECEPTOR_SIGNALING_PATHWAY	323	0.433086	2.22751	0	0	0	1
1295	GO_CELL_CELL_ADHESION	608	0.41208	2.22728	0	0	0	1
3845	GO_POSITIVE_REGULATION_OF_INTERFERON_GAMMA_PRODUCTION	65	0.555183	2.22522	0	0	0	1
1221	GO_DEFENSE_RESPONSE	1231	0.390568	2.22432	0	0	0	1
4940	GO_INTRINSIC_COMPONENT_OF_EXTERNAL_SIDE_OF_PLASMA_MEMBRANE	27	0.675492	2.21752	0	0	0	1
2995	GO_POSITIVE_REGULATION_OF_CYTOKINE_PRODUCTION	370	0.42678	2.21691	0	0	0	1
1230	GO_NEGATIVE_REGULATION_OF_INTERLEUKIN_6_PRODUCTION	35	0.623276	2.21663	2	0.002	0.0116821	1
3553	GO_REGULATION_OF_LEUKOCYTE_DEGRANULATION	41	0.604072	2.21527	0	0	0	1
2314	GO_REGULATION_OF_LYMPHOCYTE_MEDIATED_IMMUNITY	114	0.490434	2.2073	0	0	0	1
4474	GO_ANCHORED_COMPONENT_OF_EXTERNAL_SIDE_OF_PLASMA_MEMBRANE	22	0.702772	2.20623	1	0.001	0.00688824	1
1977	GO_REGULATION_OF_MAST_CELL_ACTIVATION	39	0.603373	2.20577	1	0.001	0.00688824	1
3853	GO_NEGATIVE_REGULATION_OF_CYTOKINE_PRODUCTION	211	0.44895	2.20003	0	0	0	1
4068	GO_B_CELL_RECEPTOR_SIGNALING_PATHWAY	54	0.594192	2.2	1	0.001	0.00688824	1
4829	GO_EXTRINSIC_COMPONENT_OF_CYTOPLASMIC_SIDE_OF_PLASMA_MEMBRANE	98	0.501611	2.19716	0	0	0	1
3299	GO_REGULATION_OF_CELL_ADHESION	629	0.403415	2.19673	0	0	0	1
1190	GO_REGULATION_OF_TOLL_LIKE_RECEPTOR_SIGNALING_PATHWAY	49	0.565121	2.19672	0	0	0	1
2092	GO_REGULATION_OF_INTERLEUKIN_1_PRODUCTION	58	0.546669	2.19371	0	0	0	1
254	GO_POSITIVE_REGULATION_OF_HEMOPOIESIS	163	0.460946	2.19359	12	0.012	0.0428768	1
2401	GO_MICROGLIAL_CELL_ACTIVATION	12	0.808538	2.19335	0	0	0	1
4280	GO_T_CELL_SELECTION	36	0.618082	2.18977	0	0	0	1
3487	GO_POSITIVE_REGULATION_OF_CELL_KILLING	39	0.609236	2.18873	1	0.001	0.00688824	1
489	GO_POSITIVE_REGULATION_OF_REACTIVE_OXYGEN_SPECIES_BIOSYNTHETIC_PROCESS	48	0.570847	2.18497	3	0.003	0.0157787	1
2745	GO_LYMPHOCYTE_CHEMOTAXIS	38	0.59447	2.18438	0	0	0	1
324	GO_IMMUNE_SYSTEM_PROCESS	1984	0.374343	2.18283	84	0.084	0.177764	1
2934	GO_REGULATION_OF_MYOBLAST_FUSION	19	0.731982	2.18071	1	0.001	0.00688824	1
2204	GO_POSITIVE_REGULATION_OF_ALPHA_BETA_T_CELL_PROLIFERATION	19	0.713446	2.17794	0	0	0	1
3439	GO_LYMPHOCYTE_MIGRATION	49	0.566087	2.17629	1	0.001	0.00688824	1
1740	GO_MYELOID_LEUKOCYTE_ACTIVATION	98	0.505234	2.17514	0	0	0	1
1352	GO_REGULATION_OF_LEUKOCYTE_DIFFERENTIATION	232	0.441506	2.17487	0	0	0	1
642	GO_REGULATION_OF_TYPE_2_IMMUNE_RESPONSE	26	0.658891	2.1747	1	0.001	0.00688824	1
394	GO_REGULATION_OF_INTERFERON_GAMMA_PRODUCTION	97	0.496142	2.17087	2	0.002	0.0116821	1
285	GO_MYELOID_LEUKOCYTE_MIGRATION	99	0.49063	2.1677	9	0.009	0.0349429	1
3980	GO_NEGATIVE_REGULATION_OF_CELL_KILLING	18	0.746042	2.16765	0	0	0	1
1346	GO_PATTERN_RECOGNITION_RECEPTOR_SIGNALING_PATHWAY	109	0.487292	2.16211	0	0	0	1
2836	GO_NEGATIVE_REGULATION_OF_LYMPHOCYTE_MEDIATED_IMMUNITY	36	0.596639	2.16183	2	0.002	0.0116821	1
509	GO_PLATELET_ACTIVATION	142	0.464619	2.15754	4	0.004	0.0193682	1
4888	GO_LAMELLAR_BODY	20	0.701713	2.15747	2	0.002	0.0116821	1
4159	GO_BIOLOGICAL_ADHESION	1032	0.381551	2.15668	0	0	0	1
2131	GO_GRANULOCYTE_MIGRATION	75	0.516878	2.15631	0	0	0	1
375	GO_POSITIVE_REGULATION_OF_INTERLEUKIN_1_BETA_PRODUCTION	30	0.635657	2.155	2	0.002	0.0116821	1
4739	GO_COATED_VESICLE_MEMBRANE	139	0.468104	2.15205	0	0	0	1
2642	GO_POSITIVE_REGULATION_OF_RESPONSE_TO_WOUNDING	162	0.455147	2.14866	0	0	0	1
902	GO_DETECTION_OF_OTHER_ORGANISM	19	0.716624	2.14549	2	0.002	0.0116821	1
977	GO_REGULATION_OF_ACTIVATED_T_CELL_PROLIFERATION	40	0.576835	2.14501	1	0.001	0.00688824	1
4777	GO_CELL_SURFACE	757	0.391433	2.14189	0	0	0	1
822	GO_ANTIGEN_PROCESSING_AND_PRESENTATION_VIA_MHC_CLASS_IB	15	0.742461	2.14003	1	0.001	0.00688824	1
4870	GO_ENDOSOMAL_PART	430	0.406532	2.13909	0	0	0	1
2162	GO_MACROPHAGE_ACTIVATION	31	0.619404	2.13747	1	0.001	0.00688824	1
1553	GO_REGULATION_OF_INTERLEUKIN_1_BETA_PRODUCTION	48	0.566149	2.13645	1	0.001	0.00688824	1
3744	GO_POSITIVE_REGULATION_OF_INFLAMMATORY_RESPONSE	113	0.473827	2.12739	0	0	0	1
3610	GO_REGULATION_OF_IMMUNE_EFFECTOR_PROCESS	424	0.405158	2.12307	0	0	0	1
4456	GO_ER_TO_GOLGI_TRANSPORT_VESICLE	71	0.517042	2.12301	0	0	0	1
5284	GO_SCAVENGER_RECEPTOR_ACTIVITY	45	0.556301	2.12168	1	0.001	0.00688824	1
4984	GO_BASAL_PART_OF_CELL	51	0.556774	2.12113	0	0	0	1
3681	GO_RESPONSE_TO_CYTOKINE	714	0.3831	2.12086	0	0	0	1
4158	GO_CELLULAR_DEFENSE_RESPONSE	60	0.541289	2.11953	0	0	0	1
3321	GO_REGULATION_OF_PHAGOCYTOSIS	68	0.52526	2.11539	0	0	0	1
3117	GO_PEPTIDYL_TYROSINE_AUTOPHOSPHORYLATION	39	0.59042	2.11497	2	0.002	0.0116821	1
633	GO_ANTIGEN_RECEPTOR_MEDIATED_SIGNALING_PATHWAY	195	0.441843	2.11444	5	0.005	0.0228809	1
5004	GO_MHC_CLASS_I_PROTEIN_COMPLEX	11	0.805367	2.11021	1	0.001	0.00688824	1
259	GO_LEUKOCYTE_DEGRANULATION	30	0.618651	2.10981	3	0.003	0.0157787	1
3858	GO_ENDOCYTOSIS	509	0.396904	2.10772	0	0	0	1
3746	GO_INTEGRIN_MEDIATED_SIGNALING_PATHWAY	82	0.501813	2.10723	0	0	0	1
3352	GO_REGULATION_OF_INFLAMMATORY_RESPONSE	294	0.414778	2.10562	0	0	0	1
5028	GO_IMMUNOGLOBULIN_BINDING	23	0.656783	2.10282	2	0.002	0.0116821	1
1171	GO_POSITIVE_REGULATION_OF_TUMOR_NECROSIS_FACTOR_SUPERFAMILY_CYTOKINE_PRODUCTION	57	0.532569	2.09949	0	0	0	1
391	GO_REGULATION_OF_DENDRITIC_CELL_DIFFERENTIATION	12	0.779446	2.0994	1	0.001	0.00688824	1
4569	GO_INTRINSIC_COMPONENT_OF_PLASMA_MEMBRANE	1649	0.363118	2.09863	0	0	0	1
1188	GO_RESPONSE_TO_INTERFERON_ALPHA	20	0.667967	2.09718	0	0	0	1
3112	GO_POSITIVE_REGULATION_OF_IMMUNE_EFFECTOR_PROCESS	156	0.448768	2.09411	0	0	0	1
688	GO_NEGATIVE_REGULATION_OF_INNATE_IMMUNE_RESPONSE	38	0.586449	2.08941	1	0.001	0.00688824	1
4977	GO_TRANS_GOLGI_NETWORK_MEMBRANE	81	0.495874	2.08804	0	0	0	1
2616	GO_DETECTION_OF_BIOTIC_STIMULUS	27	0.631306	2.08591	0	0	0	1
546	GO_REGULATION_OF_MAST_CELL_ACTIVATION_INVOLVED_IN_IMMUNE_RESPONSE	31	0.598688	2.08483	2	0.002	0.0116821	1
4790	GO_MEMBRANE_MICRODOMAIN	288	0.413391	2.08369	0	0	0	1
2237	GO_REGULATION_OF_LYMPHOCYTE_DIFFERENTIATION	132	0.458428	2.08354	0	0	0	1
4727	GO_CELL_TRAILING_EDGE	12	0.770504	2.08342	2	0.002	0.0116821	1
2655	GO_CELLULAR_RESPONSE_TO_CYTOKINE_STIMULUS	606	0.386219	2.08153	0	0	0	1
4126	GO_RESPONSE_TO_VIRUS	247	0.418532	2.08085	0	0	0	1
348	GO_REGULATION_OF_INTERLEUKIN_10_PRODUCTION	46	0.546164	2.08049	5	0.005	0.0228809	1
1890	GO_REGULATION_OF_T_CELL_MEDIATED_CYTOTOXICITY	23	0.655619	2.07958	1	0.001	0.00688824	1
4020	GO_PHAGOCYTOSIS	190	0.438047	2.07793	0	0	0	1
463	GO_MACROPHAGE_ACTIVATION_INVOLVED_IN_IMMUNE_RESPONSE	11	0.798429	2.07753	0	0	0	1
3428	GO_REGULATION_OF_REACTIVE_OXYGEN_SPECIES_BIOSYNTHETIC_PROCESS	65	0.515163	2.07259	1	0.001	0.00688824	1
1320	GO_POSITIVE_REGULATION_OF_RESPONSE_TO_EXTERNAL_STIMULUS	296	0.408603	2.07253	0	0	0	1
1022	GO_REGULATION_OF_NITRIC_OXIDE_BIOSYNTHETIC_PROCESS	53	0.534827	2.06899	2	0.002	0.0116821	1
4032	GO_ANTIGEN_PROCESSING_AND_PRESENTATION_OF_ENDOGENOUS_ANTIGEN	17	0.699994	2.06404	1	0.001	0.00688824	1
3695	GO_REGULATION_OF_INTERLEUKIN_6_PRODUCTION	104	0.467553	2.0622	0	0	0	1
568	GO_ROUNDABOUT_SIGNALING_PATHWAY	12	0.776403	2.06192	1	0.001	0.00688824	1
374	GO_REGULATION_OF_LEUKOCYTE_APOPTOTIC_PROCESS	79	0.494197	2.0597	7	0.007	0.0289643	1
3279	GO_POSITIVE_REGULATION_OF_LIPASE_ACTIVITY	66	0.510145	2.05893	1	0.001	0.00688824	1
1236	GO_CYTOKINE_PRODUCTION	120	0.455399	2.05876	0	0	0	1
2591	GO_NEGATIVE_REGULATION_OF_CYTOKINE_SECRETION	46	0.550256	2.05831	0	0	0	1
291	GO_REGULATION_OF_TUMOR_NECROSIS_FACTOR_SUPERFAMILY_CYTOKINE_PRODUCTION	101	0.470884	2.05757	4	0.004	0.0193682	1
1044	GO_REGULATION_OF_LEUKOCYTE_MIGRATION	149	0.441453	2.05675	0	0	0	1
725	GO_REGULATION_OF_DEFENSE_RESPONSE	759	0.373382	2.05556	39	0.039	0.10139	1
4537	GO_VACUOLE	1180	0.361318	2.05519	0	0	0	1
2524	GO_REGULATION_OF_GRANULOCYTE_MACROPHAGE_COLONY_STIMULATING_FACTOR_PRODUCTION	15	0.715376	2.05178	0	0	0	1
2113	GO_POSITIVE_REGULATION_OF_INTERLEUKIN_1_PRODUCTION	36	0.578506	2.04944	1	0.001	0.00688824	1
949	GO_NEGATIVE_REGULATION_OF_REGULATED_SECRETORY_PATHWAY	22	0.638686	2.04923	3	0.003	0.0157787	1
188	GO_CELLULAR_RESPONSE_TO_VIRUS	22	0.633985	2.04873	3	0.003	0.0157787	1
1028	GO_REGULATION_OF_INNATE_IMMUNE_RESPONSE	357	0.393084	2.04809	0	0	0	1
239	GO_POSITIVE_REGULATION_OF_ENDOCYTOSIS	114	0.459598	2.04612	7	0.007	0.0289643	1
1384	GO_CELLULAR_EXTRAVASATION	25	0.624059	2.04459	1	0.001	0.00688824	1
4961	GO_EXTRINSIC_COMPONENT_OF_PLASMA_MEMBRANE	136	0.44349	2.04362	0	0	0	1
2384	GO_REGULATION_OF_CD4_POSITIVE_ALPHA_BETA_T_CELL_ACTIVATION	38	0.572915	2.04331	0	0	0	1
3532	GO_POSITIVE_REGULATION_OF_ALPHA_BETA_T_CELL_DIFFERENTIATION	37	0.571466	2.03985	2	0.002	0.0116821	1
4897	GO_COATED_VESICLE	234	0.414787	2.03913	0	0	0	1
1216	GO_POSITIVE_REGULATION_OF_INTERLEUKIN_1_SECRETION	24	0.629292	2.03879	1	0.001	0.00688824	1
3054	GO_REGULATION_OF_INTERLEUKIN_8_SECRETION	19	0.678893	2.03777	1	0.001	0.00688824	1
4909	GO_LYTIC_VACUOLE_MEMBRANE	275	0.407635	2.03622	0	0	0	1
1090	GO_CALCIUM_MEDIATED_SIGNALING	90	0.467304	2.03547	0	0	0	1
2782	GO_REGULATION_OF_T_CELL_MEDIATED_IMMUNITY	52	0.529762	2.03543	2	0.002	0.0116821	1
2459	GO_REGULATION_OF_T_CELL_DIFFERENTIATION	107	0.462337	2.02999	0	0	0	1
2336	GO_REGULATION_OF_INTERLEUKIN_13_PRODUCTION	18	0.67277	2.02977	1	0.001	0.00688824	1
963	GO_REGULATION_OF_TOLERANCE_INDUCTION	18	0.67469	2.02901	0	0	0	1
2011	GO_REGULATION_OF_RESPONSE_TO_WOUNDING	413	0.384342	2.02808	0	0	0	1
1705	GO_NEGATIVE_REGULATION_OF_LEUKOCYTE_MIGRATION	32	0.581353	2.02807	3	0.003	0.0157787	1
4666	GO_EARLY_ENDOSOME_MEMBRANE	113	0.453326	2.02731	0	0	0	1
884	GO_NEGATIVE_REGULATION_OF_EXOCYTOSIS	28	0.592431	2.0262	3	0.003	0.0157787	1
4978	GO_ENDOSOME	793	0.365911	2.02579	0	0	0	1
3505	GO_REGULATION_OF_SYSTEMIC_ARTERIAL_BLOOD_PRESSURE_BY_RENIN_ANGIOTENSIN	22	0.639994	2.02552	0	0	0	1
1285	GO_CELL_ACTIVATION_INVOLVED_IN_IMMUNE_RESPONSE	139	0.441117	2.02379	0	0	0	1
2282	GO_POSITIVE_REGULATION_OF_REACTIVE_OXYGEN_SPECIES_METABOLIC_PROCESS	86	0.481548	2.02051	0	0	0	1
274	GO_TOLERANCE_INDUCTION	12	0.755703	2.01999	2	0.002	0.0116821	1
825	GO_ADAPTIVE_IMMUNE_RESPONSE_BASED_ON_SOMATIC_RECOMBINATION_OF_IMMUNE_RECEPTORS_BUILT_FROM_IMMUNOGLOBULIN_SUPERFAMILY_DOMAINS	154	0.436385	2.01984	7	0.007	0.0289643	1
3436	GO_POSITIVE_REGULATION_OF_INTERLEUKIN_13_PRODUCTION	13	0.73213	2.01974	0	0	0	1
3608	GO_BONE_RESORPTION	21	0.638102	2.01834	1	0.001	0.00688824	1
4423	GO_REGULATION_OF_VASCULATURE_DEVELOPMENT	233	0.409493	2.0183	0	0	0	1
4324	GO_RENAL_SYSTEM_PROCESS	102	0.466837	2.01618	0	0	0	1
379	GO_DISRUPTION_OF_CELLS_OF_OTHER_ORGANISM_INVOLVED_IN_SYMBIOTIC_INTERACTION	12	0.769022	2.01568	0	0	0	1
2302	GO_REGULATION_OF_RYANODINE_SENSITIVE_CALCIUM_RELEASE_CHANNEL_ACTIVITY	27	0.60807	2.01527	1	0.001	0.00688824	1
257	GO_REGULATION_OF_PHOSPHATIDYLINOSITOL_3_KINASE_ACTIVITY	40	0.556544	2.01487	1	0.001	0.00688824	1
5786	GO_G_PROTEIN_COUPLED_CHEMOATTRACTANT_RECEPTOR_ACTIVITY	25	0.618985	2.01432	2	0.002	0.0116821	1
5692	GO_SULFURIC_ESTER_HYDROLASE_ACTIVITY	17	0.678512	2.01359	0	0	0	1
4297	GO_ANTIGEN_PROCESSING_AND_PRESENTATION_OF_ENDOGENOUS_PEPTIDE_ANTIGEN	14	0.728239	2.01271	1	0.001	0.00688824	1
4289	GO_REGULATION_OF_SYSTEMIC_ARTERIAL_BLOOD_PRESSURE_MEDIATED_BY_A_CHEMICAL_SIGNAL	45	0.545815	2.01185	2	0.002	0.0116821	1
836	GO_NEGATIVE_REGULATION_OF_NATURAL_KILLER_CELL_MEDIATED_IMMUNITY	12	0.748558	2.01173	0	0	0	1
783	GO_RESPIRATORY_SYSTEM_PROCESS	14	0.713073	2.00978	1	0.001	0.00688824	1
4091	GO_REGULATED_EXOCYTOSIS	224	0.41053	2.00907	0	0	0	1
5180	GO_HEPARIN_BINDING	157	0.427432	2.00888	0	0	0	1
2096	GO_POSITIVE_REGULATION_OF_CD4_POSITIVE_ALPHA_BETA_T_CELL_ACTIVATION	27	0.602877	2.00516	0	0	0	1
1164	GO_REGULATION_OF_VESICLE_MEDIATED_TRANSPORT	462	0.378376	2.00302	0	0	0	1
4725	GO_RUFFLE_MEMBRANE	80	0.475644	2.00103	0	0	0	1
1237	GO_TOLL_LIKE_RECEPTOR_SIGNALING_PATHWAY	85	0.471216	1.99995	1	0.001	0.00688824	1
193	GO_DENDRITIC_CELL_DIFFERENTIATION	33	0.56583	1.99937	4	0.004	0.0193682	1
2167	GO_REGULATION_OF_URINE_VOLUME	20	0.647723	1.9991	0	0	0	1
5722	GO_SIGNALING_ADAPTOR_ACTIVITY	74	0.491943	1.99725	0	0	0	1
2028	GO_REGULATION_OF_LIPASE_ACTIVITY	83	0.479374	1.99723	0	0	0	1
5293	GO_GLYCOSAMINOGLYCAN_BINDING	205	0.410437	1.99664	0	0	0	1
5579	GO_CORECEPTOR_ACTIVITY	38	0.55515	1.99641	0	0	0	1
4774	GO_VACUOLAR_PART	694	0.364231	1.99461	0	0	0	1
2976	GO_NEGATIVE_REGULATION_OF_LEUKOCYTE_DEGRANULATION	11	0.754255	1.99387	3	0.003	0.0157787	1
5332	GO_NON_MEMBRANE_SPANNING_PROTEIN_TYROSINE_KINASE_ACTIVITY	46	0.53162	1.99222	0	0	0	1
2757	GO_POSITIVE_REGULATION_OF_INTERLEUKIN_4_PRODUCTION	22	0.628642	1.98995	1	0.001	0.00688824	1
4873	GO_T_TUBULE	45	0.522241	1.98877	1	0.001	0.00688824	1
245	GO_DENDRITIC_CELL_MIGRATION	21	0.626656	1.98865	4	0.004	0.0193682	1
4935	GO_EXTRINSIC_COMPONENT_OF_MEMBRANE	252	0.399321	1.98758	0	0	0	1
1455	GO_REGULATION_OF_MYOBLAST_DIFFERENTIATION	48	0.525569	1.98506	3	0.003	0.0157787	1
625	GO_POSITIVE_REGULATION_OF_VASCULATURE_DEVELOPMENT	133	0.440327	1.98454	6	0.006	0.0259707	1
1706	GO_REGULATION_OF_PROTEIN_SECRETION	389	0.379757	1.98098	0	0	0	1
2688	GO_T_CELL_MIGRATION	14	0.719836	1.98029	0	0	0	1
1703	GO_CHEMOKINE_MEDIATED_SIGNALING_PATHWAY	72	0.477285	1.98021	1	0.001	0.00688824	1
563	GO_ALPHA_BETA_T_CELL_DIFFERENTIATION	45	0.531945	1.97986	5	0.005	0.0228809	1
4153	GO_REGULATION_OF_GTPASE_ACTIVITY	673	0.362075	1.9785	0	0	0	1
3099	GO_POSITIVE_REGULATION_OF_EPITHELIAL_CELL_MIGRATION	103	0.452129	1.97246	0	0	0	1
4097	GO_PURINERGIC_RECEPTOR_SIGNALING_PATHWAY	28	0.578206	1.97218	4	0.004	0.0193682	1
2691	GO_REGULATION_OF_ENDOCYTOSIS	199	0.404039	1.97056	0	0	0	1
1035	GO_LEUKOCYTE_MEDIATED_IMMUNITY	189	0.419161	1.97025	0	0	0	1
480	GO_THYMIC_T_CELL_SELECTION	19	0.633764	1.96956	3	0.003	0.0157787	1
4019	GO_POSITIVE_REGULATION_OF_DEFENSE_RESPONSE	364	0.382734	1.96894	0	0	0	1
1371	GO_TAXIS	464	0.371295	1.96742	0	0	0	1
1660	GO_REGULATION_OF_CALCIUM_ION_TRANSMEMBRANE_TRANSPORT	116	0.438217	1.96719	3	0.003	0.0157787	1
2697	GO_NEGATIVE_T_CELL_SELECTION	13	0.742438	1.96657	0	0	0	1
1607	GO_REGULATION_OF_SMALL_GTPASE_MEDIATED_SIGNAL_TRANSDUCTION	278	0.395005	1.96615	0	0	0	1
296	GO_RESPONSE_TO_MUSCLE_STRETCH	19	0.643245	1.96495	2	0.002	0.0116821	1
3694	GO_REGULATION_OF_T_HELPER_1_TYPE_IMMUNE_RESPONSE	22	0.624499	1.96486	1	0.001	0.00688824	1
4745	GO_VACUOLAR_LUMEN	115	0.435018	1.96457	0	0	0	1
41	GO_POSITIVE_REGULATION_OF_MYOTUBE_DIFFERENTIATION	29	0.582757	1.9627	4	0.004	0.0193682	1
5799	GO_ARYLSULFATASE_ACTIVITY	12	0.739313	1.95998	0	0	0	1
1569	GO_REGULATION_OF_T_CELL_TOLERANCE_INDUCTION	12	0.735928	1.95992	1	0.001	0.00688824	1
1700	GO_BONE_REMODELING	35	0.549598	1.95908	0	0	0	1
2192	GO_NEGATIVE_REGULATION_OF_DEFENSE_RESPONSE	144	0.422148	1.95907	0	0	0	1
2132	GO_POSITIVE_REGULATION_OF_ANTIGEN_RECEPTOR_MEDIATED_SIGNALING_PATHWAY	15	0.698029	1.95894	1	0.001	0.00688824	1
998	GO_RESPONSE_TO_MURAMYL_DIPEPTIDE	15	0.677649	1.95837	5	0.005	0.0228809	1
4506	GO_PLASMA_MEMBRANE_RECEPTOR_COMPLEX	175	0.411704	1.95655	0	0	0	1
2129	GO_REGULATION_OF_ALPHA_BETA_T_CELL_DIFFERENTIATION	46	0.523705	1.95584	1	0.001	0.00688824	1
4035	GO_POSITIVE_REGULATION_OF_STRIATED_MUSCLE_CELL_DIFFERENTIATION	52	0.505903	1.95281	1	0.001	0.00688824	1
1775	GO_POSITIVE_REGULATION_OF_PROTEIN_SECRETION	211	0.403949	1.95153	0	0	0	1
169	GO_POSITIVE_REGULATION_OF_PHOSPHOLIPASE_ACTIVITY	53	0.502717	1.95133	1	0.001	0.00688824	1
2755	GO_MACROPHAGE_CHEMOTAXIS	13	0.711256	1.94889	0	0	0	1
3705	GO_POSITIVE_REGULATION_OF_TYROSINE_PHOSPHORYLATION_OF_STAT5_PROTEIN	16	0.669704	1.94591	2	0.002	0.0116821	1
5016	GO_VACUOLAR_MEMBRANE	587	0.358534	1.94356	0	0	0	1
3609	GO_AXONEME_ASSEMBLY	44	0.517786	1.94339	1	0.001	0.00688824	1
3743	GO_PLATELET_DEGRANULATION	107	0.441695	1.94316	0	0	0	1
3780	GO_REGULATION_OF_CELL_SHAPE	139	0.420422	1.9429	0	0	0	1
1244	GO_REGULATION_OF_MONONUCLEAR_CELL_MIGRATION	16	0.682628	1.94114	1	0.001	0.00688824	1
1889	GO_REGULATION_OF_ERK1_AND_ERK2_CASCADE	238	0.393164	1.94047	0	0	0	1
1629	GO_POSITIVE_REGULATION_OF_TYPE_2_IMMUNE_RESPONSE	14	0.697754	1.94019	2	0.002	0.0116821	1
4416	GO_POSITIVE_REGULATION_OF_LEUKOCYTE_MEDIATED_IMMUNITY	85	0.445663	1.93818	0	0	0	1
2717	GO_REGULATION_OF_CYTOSOLIC_CALCIUM_ION_CONCENTRATION	203	0.399973	1.93732	0	0	0	1
3820	GO_POSITIVE_REGULATION_OF_CHEMOTAXIS	120	0.431395	1.936	1	0.001	0.00688824	1
4979	GO_TRANSPORT_VESICLE_MEMBRANE	151	0.418186	1.93549	0	0	0	1
717	GO_NEGATIVE_REGULATION_OF_TOLL_LIKE_RECEPTOR_SIGNALING_PATHWAY	29	0.569563	1.93532	2	0.002	0.0116821	1
648	GO_REGULATION_OF_EPITHELIAL_CELL_MIGRATION	166	0.411357	1.93486	9	0.009	0.0349429	1
232	GO_NEGATIVE_REGULATION_OF_ADAPTIVE_IMMUNE_RESPONSE	37	0.55178	1.93432	1	0.001	0.00688824	1
2514	GO_T_CELL_RECEPTOR_SIGNALING_PATHWAY	146	0.421909	1.93366	1	0.001	0.00688824	1
1928	GO_REGULATION_OF_PHOSPHOLIPASE_ACTIVITY	64	0.477789	1.93253	2	0.002	0.0116821	1
1441	GO_MAST_CELL_ACTIVATION	21	0.620139	1.9304	0	0	0	1
2761	GO_ALPHA_BETA_T_CELL_ACTIVATION	54	0.497681	1.92873	0	0	0	1
1993	GO_REGULATION_OF_I_KAPPAB_KINASE_NF_KAPPAB_SIGNALING	233	0.392723	1.92724	0	0	0	1
4589	GO_TRANS_GOLGI_NETWORK	193	0.397469	1.92687	0	0	0	1
4258	GO_NEGATIVE_REGULATION_OF_HOMOTYPIC_CELL_CELL_ADHESION	102	0.435801	1.92602	0	0	0	1
5009	GO_CHYLOMICRON	13	0.693317	1.92451	3	0.003	0.0157787	1
2907	GO_PURINERGIC_NUCLEOTIDE_RECEPTOR_SIGNALING_PATHWAY	22	0.60419	1.92096	3	0.003	0.0157787	1
5233	GO_NITRIC_OXIDE_SYNTHASE_BINDING	19	0.621098	1.92072	0	0	0	1
3396	GO_NEGATIVE_REGULATION_OF_MULTI_ORGANISM_PROCESS	151	0.408334	1.92036	0	0	0	1
3925	GO_POSITIVE_REGULATION_OF_NATURAL_KILLER_CELL_MEDIATED_IMMUNITY	21	0.627108	1.91953	3	0.003	0.0157787	1
2966	GO_REGULATION_OF_B_CELL_PROLIFERATION	55	0.491989	1.9178	2	0.002	0.0116821	1
1433	GO_REGULATION_OF_LIPOPROTEIN_LIPASE_ACTIVITY	15	0.683827	1.91524	2	0.002	0.0116821	1
4511	GO_CYTOPLASMIC_SIDE_OF_MEMBRANE	170	0.400319	1.91426	0	0	0	1
991	GO_REGULATION_OF_INTERLEUKIN_10_SECRETION	12	0.701055	1.91421	5	0.005	0.0228809	1
2952	GO_REGULATION_OF_LEUKOCYTE_CHEMOTAXIS	96	0.438761	1.91384	0	0	0	1
2885	GO_TRACHEA_MORPHOGENESIS	12	0.715958	1.9118	1	0.001	0.00688824	1
5370	GO_RAS_GUANYL_NUCLEOTIDE_EXCHANGE_FACTOR_ACTIVITY	228	0.387728	1.91031	0	0	0	1
4878	GO_SARCOLEMMA	125	0.421217	1.91023	1	0.001	0.00688824	1
4219	GO_REGULATION_OF_RELEASE_OF_SEQUESTERED_CALCIUM_ION_INTO_CYTOSOL_BY_SARCOPLASMIC_RETICULUM	25	0.582442	1.90987	2	0.002	0.0116821	1
4198	GO_HEMOSTASIS	311	0.373902	1.90945	0	0	0	1
3655	GO_REGULATION_OF_RESPONSE_TO_CYTOKINE_STIMULUS	144	0.413474	1.90881	0	0	0	1
956	GO_POSITIVE_REGULATION_OF_B_CELL_PROLIFERATION	37	0.5356	1.9085	2	0.002	0.0116821	1
1472	GO_REGULATION_OF_HEMOPOIESIS	314	0.374913	1.90844	0	0	0	1
924	GO_REGULATION_OF_SEQUESTERING_OF_CALCIUM_ION	107	0.429073	1.90778	4	0.004	0.0193682	1
562	GO_POSITIVE_REGULATION_OF_TRANSCRIPTION_FACTOR_IMPORT_INTO_NUCLEUS	51	0.493769	1.90553	5	0.005	0.0228809	1
4965	GO_ANCHORED_COMPONENT_OF_PLASMA_MEMBRANE	43	0.514941	1.9037	3	0.003	0.0157787	1
2258	GO_REGULATION_OF_GRANULOCYTE_CHEMOTAXIS	39	0.523824	1.90359	1	0.001	0.00688824	1
2693	GO_MYELOID_LEUKOCYTE_MEDIATED_IMMUNITY	43	0.506458	1.90356	3	0.003	0.0157787	1
1899	GO_REGULATION_OF_CALCIUM_ION_TRANSPORT	209	0.389214	1.90236	0	0	0	1
2347	GO_REGULATION_OF_REGULATED_SECRETORY_PATHWAY	130	0.413985	1.89779	0	0	0	1
4824	GO_RECEPTOR_COMPLEX	327	0.370125	1.89733	0	0	0	1
32	GO_REGULATION_OF_B_CELL_RECEPTOR_SIGNALING_PATHWAY	15	0.675313	1.89705	3	0.003	0.0157787	1
1225	GO_POSITIVE_REGULATION_OF_HYDROLASE_ACTIVITY	905	0.337523	1.89548	0	0	0	1
1019	GO_ACTIN_POLYMERIZATION_OR_DEPOLYMERIZATION	37	0.52947	1.89442	2	0.002	0.0116821	1
1544	GO_REGULATION_OF_MACROPHAGE_CHEMOTAXIS	16	0.64886	1.89419	2	0.002	0.0116821	1
2469	GO_GLYCOSPHINGOLIPID_METABOLIC_PROCESS	69	0.473216	1.89386	2	0.002	0.0116821	1
273	GO_NEGATIVE_REGULATION_OF_SMOOTH_MUSCLE_CELL_PROLIFERATION	36	0.525418	1.89185	4	0.004	0.0193682	1
4692	GO_HETEROTRIMERIC_G_PROTEIN_COMPLEX	32	0.534513	1.89164	6	0.006	0.0259707	1
1162	GO_PHAGOLYSOSOME_ASSEMBLY	11	0.735857	1.89159	2	0.002	0.0116821	1
3108	GO_MAST_CELL_MEDIATED_IMMUNITY	18	0.640381	1.89019	2	0.002	0.0116821	1
1085	GO_REGULATION_OF_PHOSPHOLIPID_METABOLIC_PROCESS	61	0.474085	1.88988	4	0.004	0.0193682	1
445	GO_POSITIVE_REGULATION_OF_LIPID_KINASE_ACTIVITY	32	0.546188	1.8897	3	0.003	0.0157787	1
5402	GO_GUANYL_NUCLEOTIDE_EXCHANGE_FACTOR_ACTIVITY	303	0.371339	1.88949	0	0	0	1
3445	GO_RESPONSE_TO_BIOTIC_STIMULUS	886	0.340487	1.88891	0	0	0	1
2008	GO_CILIUM_MOVEMENT	36	0.534814	1.88884	4	0.004	0.0193682	1
441	GO_POSITIVE_REGULATION_OF_MUSCLE_CELL_DIFFERENTIATION	84	0.446235	1.8874	5	0.005	0.0228809	1
5597	GO_CCR_CHEMOKINE_RECEPTOR_BINDING	35	0.532918	1.88738	3	0.003	0.0157787	1
1971	GO_INTERFERON_GAMMA_PRODUCTION	15	0.670891	1.88665	1	0.001	0.00688824	1
2683	GO_TISSUE_REMODELING	87	0.441903	1.88531	0	0	0	1
415	GO_NEGATIVE_REGULATION_OF_LEUKOCYTE_PROLIFERATION	69	0.459348	1.88329	7	0.007	0.0289643	1
99	GO_G_PROTEIN_COUPLED_PURINERGIC_RECEPTOR_SIGNALING_PATHWAY	20	0.612485	1.88326	3	0.003	0.0157787	1
4151	GO_MONOAMINE_TRANSPORT	22	0.589734	1.88092	4	0.004	0.0193682	1
699	GO_SECOND_MESSENGER_MEDIATED_SIGNALING	160	0.401885	1.8806	6	0.006	0.0259707	1
4015	GO_REGULATION_OF_SYSTEMIC_ARTERIAL_BLOOD_PRESSURE_BY_HORMONE	35	0.542692	1.87996	2	0.002	0.0116821	1
760	GO_NEGATIVE_REGULATION_OF_CELL_CELL_ADHESION	138	0.409577	1.87978	7	0.007	0.0289643	1
3724	GO_RECEPTOR_MEDIATED_ENDOCYTOSIS	231	0.388726	1.87977	0	0	0	1
418	GO_DENDRITIC_CELL_CHEMOTAXIS	16	0.639669	1.87781	2	0.002	0.0116821	1
4442	GO_MULTIVESICULAR_BODY	38	0.529881	1.87648	3	0.003	0.0157787	1
5286	GO_ICOSANOID_RECEPTOR_ACTIVITY	15	0.665925	1.87641	1	0.001	0.00688824	1
3093	GO_POSITIVE_REGULATION_OF_CYTOKINE_BIOSYNTHETIC_PROCESS	58	0.471615	1.87576	4	0.004	0.0193682	1
2700	GO_NEGATIVE_REGULATION_OF_I_KAPPAB_KINASE_NF_KAPPAB_SIGNALING	51	0.491528	1.87572	2	0.002	0.0116821	1
5610	GO_WATER_TRANSMEMBRANE_TRANSPORTER_ACTIVITY	15	0.661465	1.87509	5	0.005	0.0228809	1
1438	GO_AXONEMAL_DYNEIN_COMPLEX_ASSEMBLY	22	0.597616	1.87438	1	0.001	0.00688824	1
3636	GO_REGULATION_OF_INTERLEUKIN_2_PRODUCTION	48	0.492697	1.87415	3	0.003	0.0157787	1
3248	GO_POSITIVE_REGULATION_OF_LIPID_METABOLIC_PROCESS	128	0.41485	1.87408	0	0	0	1
4228	GO_POSITIVE_REGULATION_OF_NF_KAPPAB_IMPORT_INTO_NUCLEUS	27	0.57387	1.87159	2	0.002	0.0116821	1
2278	GO_NEGATIVE_REGULATION_OF_VASCULATURE_DEVELOPMENT	80	0.446534	1.87125	2	0.002	0.0116821	1
438	GO_RESPONSE_TO_FLUID_SHEAR_STRESS	34	0.524847	1.87062	5	0.005	0.0228809	1
3497	GO_NEGATIVE_REGULATION_OF_CELL_ADHESION	223	0.381227	1.86963	0	0	0	1
1451	GO_ANATOMICAL_STRUCTURE_REGRESSION	12	0.704707	1.86946	1	0.001	0.00688824	1
5521	GO_PEPTIDASE_ACTIVATOR_ACTIVITY_INVOLVED_IN_APOPTOTIC_PROCESS	21	0.605532	1.86866	2	0.002	0.0116821	1
1477	GO_POSITIVE_REGULATION_OF_CALCIUM_MEDIATED_SIGNALING	38	0.526385	1.86776	0	0	0	1
2253	GO_REGULATION_OF_CALCIUM_ION_TRANSPORT_INTO_CYTOSOL	92	0.435586	1.86747	0	0	0	1
722	GO_REGULATION_OF_BODY_FLUID_LEVELS	506	0.351277	1.86739	19	0.019	0.0592948	1
824	GO_POSITIVE_REGULATION_OF_STEROL_TRANSPORT	17	0.618145	1.86648	4	0.004	0.0193682	1
2569	GO_REGULATION_OF_TUMOR_NECROSIS_FACTOR_BIOSYNTHETIC_PROCESS	18	0.629824	1.86586	2	0.002	0.0116821	1
5613	GO_BETA_AMYLOID_BINDING	35	0.531571	1.86579	2	0.002	0.0116821	1
3947	GO_ENDOTHELIAL_TUBE_MORPHOGENESIS	11	0.713845	1.86571	1	0.001	0.00688824	1
1998	GO_POSITIVE_REGULATION_OF_MULTICELLULAR_ORGANISMAL_PROCESS	1395	0.327416	1.86451	0	0	0	1
1735	GO_PHAGOSOME_MATURATION	38	0.522755	1.86161	2	0.002	0.0116821	1
5003	GO_ANCHORED_COMPONENT_OF_MEMBRANE	152	0.401559	1.86132	0	0	0	1
4025	GO_POSITIVE_REGULATION_OF_MYELOID_LEUKOCYTE_MEDIATED_IMMUNITY	18	0.617239	1.86046	6	0.006	0.0259707	1
2376	GO_RESPIRATORY_BURST	15	0.659265	1.8604	5	0.005	0.0228809	1
1315	GO_REGULATION_OF_MACROPHAGE_DERIVED_FOAM_CELL_DIFFERENTIATION	28	0.559421	1.85888	3	0.003	0.0157787	1
233	GO_REGULATION_OF_SYSTEMIC_ARTERIAL_BLOOD_PRESSURE_BY_CIRCULATORY_RENIN_ANGIOTENSIN	14	0.680691	1.85884	5	0.005	0.0228809	1
3185	GO_REGULATION_OF_CHEMOTAXIS	180	0.388001	1.8586	0	0	0	1
4675	GO_LEADING_EDGE_MEMBRANE	134	0.404201	1.85792	0	0	0	1
597	GO_MYELOID_LEUKOCYTE_DIFFERENTIATION	96	0.427291	1.85756	7	0.007	0.0289643	1
100	GO_MEMBRANE_DEPOLARIZATION	61	0.472748	1.85574	4	0.004	0.0193682	1
1662	GO_RESPONSE_TO_BACTERIUM	528	0.34888	1.85492	0	0	0	1
5547	GO_CARGO_RECEPTOR_ACTIVITY	66	0.449416	1.85364	1	0.001	0.00688824	1
2595	GO_NATURAL_KILLER_CELL_ACTIVATION	55	0.472755	1.8536	1	0.001	0.00688824	1
1217	GO_REGULATION_OF_CYTOKINE_PRODUCTION_INVOLVED_IN_IMMUNE_RESPONSE	57	0.473402	1.85305	3	0.003	0.0157787	1
2918	GO_POSITIVE_REGULATION_OF_ACTIVATED_T_CELL_PROLIFERATION	28	0.54253	1.85137	4	0.004	0.0193682	1
2915	GO_POSITIVE_REGULATION_OF_WOUND_HEALING	48	0.486871	1.85059	2	0.002	0.0116821	1
3280	GO_POSITIVE_REGULATION_OF_ERK1_AND_ERK2_CASCADE	172	0.389192	1.84939	0	0	0	1
186	GO_G_PROTEIN_COUPLED_PURINERGIC_NUCLEOTIDE_RECEPTOR_SIGNALING_PATHWAY	14	0.661065	1.84894	1	0.001	0.00688824	1
716	GO_REGULATION_OF_EXOCYTOSIS	186	0.38233	1.84754	5	0.005	0.0228809	1
4868	GO_CYTOPLASMIC_VESICLE_PART	601	0.341246	1.84736	0	0	0	1
1576	GO_DEFENSE_RESPONSE_TO_OTHER_ORGANISM	505	0.351815	1.84526	0	0	0	1
3188	GO_REGULATION_OF_PLATELET_ACTIVATION	31	0.535611	1.84525	2	0.002	0.0116821	1
2339	GO_LOCOMOTION	1114	0.326861	1.84397	0	0	0	1
1781	GO_REGULATION_OF_POSTSYNAPTIC_MEMBRANE_POTENTIAL	55	0.475592	1.84395	3	0.003	0.0157787	1
4948	GO_CELL_LEADING_EDGE	350	0.358968	1.84374	0	0	0	1
2174	GO_ENDOTHELIUM_DEVELOPMENT	90	0.42845	1.84356	1	0.001	0.00688824	1
1663	GO_REGULATION_OF_ANTIGEN_PROCESSING_AND_PRESENTATION	23	0.576847	1.84332	5	0.005	0.0228809	1
4358	GO_ESTROUS_CYCLE	19	0.59518	1.8427	4	0.004	0.0193682	1
696	GO_REGULATION_OF_SYSTEMIC_ARTERIAL_BLOOD_PRESSURE	84	0.440978	1.84258	6	0.006	0.0259707	1
5725	GO_SH3_SH2_ADAPTOR_ACTIVITY	52	0.484117	1.84252	2	0.002	0.0116821	1
1821	GO_POSITIVE_REGULATION_OF_PHOSPHOLIPID_METABOLIC_PROCESS	42	0.49986	1.84234	0	0	0	1
4059	GO_PHOSPHOLIPID_EFFLUX	14	0.646713	1.84176	2	0.002	0.0116821	1
744	GO_REGULATION_OF_LYMPHOCYTE_APOPTOTIC_PROCESS	54	0.476339	1.84075	7	0.007	0.0289643	1
737	GO_B_CELL_PROLIFERATION	38	0.505136	1.83855	2	0.002	0.0116821	1
5808	GO_SIGNALING_PATTERN_RECOGNITION_RECEPTOR_ACTIVITY	17	0.624872	1.83661	2	0.002	0.0116821	1
495	GO_POSITIVE_REGULATION_OF_MEMBRANE_INVAGINATION	11	0.699526	1.83616	5	0.005	0.0228809	1
4174	GO_SIALYLATION	21	0.599302	1.83447	3	0.003	0.0157787	1
2562	GO_NEGATIVE_REGULATION_OF_MAST_CELL_ACTIVATION	11	0.692862	1.83434	6	0.006	0.0259707	1
4971	GO_EARLY_ENDOSOME	301	0.362712	1.83383	0	0	0	1
2475	GO_REGULATION_OF_NF_KAPPAB_IMPORT_INTO_NUCLEUS	48	0.492192	1.83379	1	0.001	0.00688824	1
5584	GO_CHEMOKINE_BINDING	21	0.595844	1.83349	5	0.005	0.0228809	1
709	GO_POSITIVE_REGULATION_OF_MAPK_CASCADE	470	0.34489	1.83346	18	0.018	0.0568942	1
1658	GO_REGULATION_OF_DEFENSE_RESPONSE_TO_VIRUS_BY_VIRUS	29	0.545459	1.83335	2	0.002	0.0116821	1
675	GO_NEGATIVE_REGULATION_OF_LOCOMOTION	263	0.363745	1.83193	10	0.01	0.0375921	1
776	GO_IMMUNE_SYSTEM_DEVELOPMENT	582	0.338636	1.83141	27	0.027	0.0772529	1
2962	GO_REGULATION_OF_MONOCYTE_DIFFERENTIATION	14	0.653654	1.83009	3	0.003	0.0157787	1
4225	GO_REGULATION_OF_CATION_TRANSMEMBRANE_TRANSPORT	208	0.374398	1.82869	0	0	0	1
1578	GO_LEUKOCYTE_PROLIFERATION	88	0.431672	1.82831	4	0.004	0.0193682	1
3629	GO_POSITIVE_REGULATION_OF_I_KAPPAB_KINASE_NF_KAPPAB_SIGNALING	179	0.383276	1.82748	0	0	0	1
1116	GO_REGULATION_OF_CARDIAC_MUSCLE_CONTRACTION_BY_REGULATION_OF_THE_RELEASE_OF_SEQUESTERED_CALCIUM_ION	19	0.613829	1.82706	2	0.002	0.0116821	1
4460	GO_LYSOSOMAL_LUMEN	88	0.421164	1.82585	0	0	0	1
1905	GO_LYSOSOME_LOCALIZATION	23	0.57613	1.82549	3	0.003	0.0157787	1
61	GO_REGULATION_OF_ANTIGEN_RECEPTOR_MEDIATED_SIGNALING_PATHWAY	41	0.508362	1.82503	6	0.006	0.0259707	1
3543	GO_REGULATION_OF_RELEASE_OF_SEQUESTERED_CALCIUM_ION_INTO_CYTOSOL	75	0.439122	1.82427	4	0.004	0.0193682	1
2607	GO_POSITIVE_REGULATION_OF_INNATE_IMMUNE_RESPONSE	246	0.368491	1.82409	0	0	0	1
406	GO_POSITIVE_REGULATION_OF_RESPONSE_TO_STIMULUS	1929	0.313475	1.824	77	0.077	0.166099	1
4465	GO_INFLAMMASOME_COMPLEX	12	0.691861	1.82238	5	0.005	0.0228809	1
4913	GO_RUFFLE	156	0.390899	1.82105	2	0.002	0.0116821	1
1205	GO_WOUND_HEALING	470	0.340893	1.82032	0	0	0	1
3211	GO_POSITIVE_REGULATION_OF_B_CELL_DIFFERENTIATION	14	0.655356	1.82023	4	0.004	0.0193682	1
2502	GO_NEGATIVE_REGULATION_OF_HUMORAL_IMMUNE_RESPONSE	13	0.655562	1.82003	0	0	0	1
856	GO_CALCIUM_MEDIATED_SIGNALING_USING_INTRACELLULAR_CALCIUM_SOURCE	16	0.634029	1.81909	4	0.004	0.0193682	1
5738	GO_RECEPTOR_ACTIVITY	1649	0.3148	1.81874	0	0	0	1
3621	GO_EXOCYTOSIS	310	0.355853	1.81856	0	0	0	1
2644	GO_DIVALENT_INORGANIC_CATION_HOMEOSTASIS	343	0.353046	1.81766	0	0	0	1
1903	GO_REGULATION_OF_LIPID_KINASE_ACTIVITY	48	0.478405	1.81744	0	0	0	1
4648	GO_ACTOMYOSIN	62	0.46203	1.81725	4	0.004	0.0193682	1
3896	GO_IMMUNOLOGICAL_SYNAPSE_FORMATION	11	0.723435	1.81549	3	0.003	0.0157787	1
329	GO_POSITIVE_REGULATION_OF_LEUKOCYTE_APOPTOTIC_PROCESS	28	0.545474	1.81414	8	0.008	0.0319622	1
5822	GO_C_C_CHEMOKINE_RECEPTOR_ACTIVITY	12	0.687051	1.81353	9	0.009	0.0349429	1
2948	GO_HETEROPHILIC_CELL_CELL_ADHESION_VIA_PLASMA_MEMBRANE_CELL_ADHESION_MOLECULES	45	0.488135	1.81258	5	0.005	0.0228809	1
4284	GO_RESPONSE_TO_MOLECULE_OF_BACTERIAL_ORIGIN	321	0.358757	1.81163	0	0	0	1
2234	GO_REGULATION_OF_ION_HOMEOSTASIS	201	0.379925	1.81103	0	0	0	1
5760	GO_IGG_BINDING	12	0.683354	1.80955	6	0.006	0.0259707	1
5013	GO_COLLAGEN_TRIMER	88	0.428652	1.8089	1	0.001	0.00688824	1
4101	GO_REGULATION_OF_CALCIUM_ION_TRANSMEMBRANE_TRANSPORTER_ACTIVITY	70	0.444908	1.8087	2	0.002	0.0116821	1
2012	GO_POSITIVE_T_CELL_SELECTION	21	0.595542	1.80867	4	0.004	0.0193682	1
3193	GO_REGULATION_OF_SODIUM_ION_TRANSMEMBRANE_TRANSPORTER_ACTIVITY	38	0.507085	1.80852	3	0.003	0.0157787	1
2895	GO_AMMONIUM_TRANSPORT	57	0.454468	1.80727	2	0.002	0.0116821	1
1815	GO_REGULATION_OF_INTERLEUKIN_8_PRODUCTION	61	0.459083	1.80671	2	0.002	0.0116821	1
5915	GO_CYSTEINE_TYPE_ENDOPEPTIDASE_REGULATOR_ACTIVITY_INVOLVED_IN_APOPTOTIC_PROCESS	42	0.487437	1.80667	1	0.001	0.00688824	1
5616	GO_CHEMOKINE_RECEPTOR_BINDING	57	0.453665	1.80621	6	0.006	0.0259707	1
4485	GO_VESICLE_MEMBRANE	512	0.337897	1.80486	0	0	0	1
561	GO_POSITIVE_REGULATION_OF_TRANSPORTER_ACTIVITY	76	0.432905	1.80406	3	0.003	0.0157787	1
2263	GO_STAT_CASCADE	50	0.46654	1.80262	4	0.004	0.0193682	1
312	GO_NEGATIVE_REGULATION_OF_INTERLEUKIN_1_PRODUCTION	19	0.587258	1.80162	8	0.008	0.0319622	1
5533	GO_RHO_GUANYL_NUCLEOTIDE_EXCHANGE_FACTOR_ACTIVITY	77	0.43358	1.8015	2	0.002	0.0116821	1
1235	GO_REGULATION_OF_ACUTE_INFLAMMATORY_RESPONSE	74	0.438337	1.80115	6	0.006	0.0259707	1
1628	GO_T_HELPER_1_TYPE_IMMUNE_RESPONSE	21	0.578647	1.80101	8	0.008	0.0319622	1
4966	GO_AXONEMAL_DYNEIN_COMPLEX	14	0.660043	1.80075	8	0.008	0.0319622	1
1587	GO_REGULATION_OF_T_CELL_APOPTOTIC_PROCESS	33	0.537319	1.7998	5	0.005	0.0228809	1
3358	GO_NEGATIVE_REGULATION_OF_ENDOTHELIAL_CELL_PROLIFERATION	32	0.523615	1.79947	3	0.003	0.0157787	1
4381	GO_REGULATION_OF_NEUTROPHIL_CHEMOTAXIS	27	0.542838	1.79934	2	0.002	0.0116821	1
788	GO_POSITIVE_REGULATION_OF_TRIGLYCERIDE_LIPASE_ACTIVITY	11	0.710988	1.79856	6	0.006	0.0259707	1
2291	GO_POSITIVE_REGULATION_OF_MAST_CELL_ACTIVATION	16	0.626379	1.79834	9	0.009	0.0349429	1
4084	GO_REGULATION_OF_MULTICELLULAR_ORGANISMAL_METABOLIC_PROCESS	38	0.499421	1.7973	2	0.002	0.0116821	1
1532	GO_REGULATION_OF_TRANSPORTER_ACTIVITY	198	0.372323	1.79698	0	0	0	1
1196	GO_CELL_SUBSTRATE_ADHESION	164	0.380418	1.79684	1	0.001	0.00688824	1
4640	GO_HIGH_DENSITY_LIPOPROTEIN_PARTICLE	26	0.536837	1.79651	4	0.004	0.0193682	1
1241	GO_CELL_MOTILITY	835	0.323953	1.7963	0	0	0	1
3522	GO_REGULATION_OF_RESPONSE_TO_INTERFERON_GAMMA	22	0.562365	1.79579	6	0.006	0.0259707	1
3331	GO_RETINA_VASCULATURE_DEVELOPMENT_IN_CAMERA_TYPE_EYE	16	0.615631	1.79509	4	0.004	0.0193682	1
1880	GO_REGULATION_OF_METAL_ION_TRANSPORT	325	0.350296	1.79474	0	0	0	1
4542	GO_SITE_OF_POLARIZED_GROWTH	149	0.382591	1.79448	0	0	0	1
5096	GO_CARBOHYDRATE_BINDING	277	0.355123	1.79406	0	0	0	1
1786	GO_REGULATION_OF_ENDOTHELIAL_CELL_MIGRATION	114	0.404933	1.79363	1	0.001	0.00688824	1
3394	GO_REGULATION_OF_TYROSINE_PHOSPHORYLATION_OF_STAT5_PROTEIN	20	0.578304	1.79358	4	0.004	0.0193682	1
425	GO_ACTIVATION_OF_PHOSPHOLIPASE_C_ACTIVITY	27	0.534188	1.79334	5	0.005	0.0228809	1
1857	GO_POSITIVE_REGULATION_OF_MAST_CELL_ACTIVATION_INVOLVED_IN_IMMUNE_RESPONSE	13	0.660187	1.79123	2	0.002	0.0116821	1
1322	GO_REGULATION_OF_REMOVAL_OF_SUPEROXIDE_RADICALS	11	0.704086	1.79007	5	0.005	0.0228809	1
1242	GO_POSITIVE_REGULATION_OF_ENDOTHELIAL_CELL_MIGRATION	67	0.440631	1.78993	3	0.003	0.0157787	1
414	GO_T_CELL_ACTIVATION_INVOLVED_IN_IMMUNE_RESPONSE	60	0.453909	1.788	6	0.006	0.0259707	1
1675	GO_LYMPHOCYTE_MEDIATED_IMMUNITY	147	0.394444	1.78724	0	0	0	1
431	GO_EPITHELIAL_TUBE_BRANCHING_INVOLVED_IN_LUNG_MORPHOGENESIS	25	0.549631	1.78657	5	0.005	0.0228809	1
516	GO_RESPONSE_TO_WOUNDING	563	0.331849	1.78652	22	0.022	0.0664492	1
4314	GO_REGULATION_OF_SKELETAL_MUSCLE_CELL_PROLIFERATION	12	0.664815	1.78638	9	0.009	0.0349429	1
3640	GO_NEUTROPHIL_ACTIVATION_INVOLVED_IN_IMMUNE_RESPONSE	11	0.68716	1.78511	10	0.01	0.0375921	1
3464	GO_CELLULAR_CHEMICAL_HOMEOSTASIS	570	0.33012	1.7847	0	0	0	1
1224	GO_NEGATIVE_REGULATION_OF_LEUKOCYTE_APOPTOTIC_PROCESS	43	0.483991	1.78385	4	0.004	0.0193682	1
1733	GO_HUMORAL_IMMUNE_RESPONSE	187	0.376565	1.78375	0	0	0	1
1349	GO_POSITIVE_REGULATION_OF_CELL_MATRIX_ADHESION	40	0.489231	1.78369	5	0.005	0.0228809	1
1079	GO_POSITIVE_REGULATION_OF_INTERLEUKIN_8_SECRETION	13	0.644491	1.78302	8	0.008	0.0319622	1
1296	GO_MORPHOGENESIS_OF_AN_ENDOTHELIUM	16	0.624129	1.7827	10	0.01	0.0375921	1
2540	GO_NEGATIVE_REGULATION_OF_T_CELL_PROLIFERATION	52	0.463426	1.78221	3	0.003	0.0157787	1
4177	GO_ENDOCRINE_PROCESS	44	0.485488	1.78142	4	0.004	0.0193682	1
2922	GO_POSITIVE_REGULATION_OF_MYOBLAST_DIFFERENTIATION	22	0.570719	1.77896	7	0.007	0.0289643	1
3184	GO_LYTIC_VACUOLE_ORGANIZATION	51	0.457164	1.77801	2	0.002	0.0116821	1
3909	GO_POSITIVE_REGULATION_OF_LEUKOCYTE_CHEMOTAXIS	81	0.425001	1.77773	4	0.004	0.0193682	1
364	GO_POSITIVE_REGULATION_OF_INTERLEUKIN_8_PRODUCTION	45	0.472613	1.77696	5	0.005	0.0228809	1
203	GO_POSITIVE_REGULATION_OF_ADAPTIVE_IMMUNE_RESPONSE	73	0.4266	1.77661	8	0.008	0.0319622	1
3307	GO_REGULATION_OF_MYELOID_LEUKOCYTE_DIFFERENTIATION	108	0.398479	1.77575	0	0	0	1
3053	GO_PROTEIN_LOCALIZATION_TO_CELL_SURFACE	22	0.578682	1.77563	7	0.007	0.0289643	1
2787	GO_NEGATIVE_REGULATION_OF_LYASE_ACTIVITY	27	0.53484	1.77546	11	0.011	0.0402268	1
4588	GO_PROTEIN_COMPLEX_INVOLVED_IN_CELL_ADHESION	30	0.518721	1.77424	2	0.002	0.0116821	1
377	GO_SECRETION_BY_CELL	486	0.335391	1.77209	20	0.02	0.0618286	1
5449	GO_MHC_CLASS_II_PROTEIN_COMPLEX_BINDING	16	0.603636	1.77177	14	0.014	0.0478279	1
5775	GO_PEPTIDE_RECEPTOR_ACTIVITY	133	0.383961	1.77163	0	0	0	1
2294	GO_PARTURITION	20	0.575046	1.77128	6	0.006	0.0259707	1
4956	GO_PROTEIN_LIPID_COMPLEX	40	0.48318	1.77023	5	0.005	0.0228809	1
5034	GO_TRANSMEMBRANE_RECEPTOR_PROTEIN_KINASE_ACTIVITY	81	0.419586	1.76817	4	0.004	0.0193682	1
2387	GO_POSITIVE_REGULATION_OF_URINE_VOLUME	14	0.628408	1.76789	10	0.01	0.0375921	1
3083	GO_CELLULAR_WATER_HOMEOSTASIS	14	0.63939	1.76685	13	0.013	0.0454079	1
4611	GO_ACTIN_FILAMENT_BUNDLE	57	0.454348	1.76624	4	0.004	0.0193682	1
1945	GO_PROTEIN_KINASE_B_SIGNALING	34	0.511221	1.76539	3	0.003	0.0157787	1
2498	GO_TRACHEA_DEVELOPMENT	20	0.568827	1.76415	9	0.009	0.0349429	1
3926	GO_POSITIVE_REGULATION_OF_ORGAN_GROWTH	38	0.497265	1.7635	7	0.007	0.0289643	1
4194	GO_REGULATION_OF_LYMPHOCYTE_MIGRATION	38	0.489987	1.7621	6	0.006	0.0259707	1
281	GO_REGULATION_OF_WOUND_HEALING	126	0.387044	1.76063	8	0.008	0.0319622	1
4967	GO_MAST_CELL_GRANULE	21	0.565299	1.76013	6	0.006	0.0259707	1
485	GO_ACTIN_MYOSIN_FILAMENT_SLIDING	38	0.491817	1.75912	3	0.003	0.0157787	1
354	GO_RESPONSE_TO_PROSTAGLANDIN_E	25	0.542022	1.75861	6	0.006	0.0259707	1
3804	GO_STRESS_ACTIVATED_PROTEIN_KINASE_SIGNALING_CASCADE	103	0.398966	1.75796	1	0.001	0.00688824	1
298	GO_REGULATION_OF_PHOSPHATIDYLINOSITOL_3_KINASE_SIGNALING	138	0.380098	1.75789	8	0.008	0.0319622	1
2458	GO_REGULATION_OF_CHRONIC_INFLAMMATORY_RESPONSE	11	0.674632	1.75707	7	0.007	0.0289643	1
849	GO_ACTIVATION_OF_JUN_KINASE_ACTIVITY	35	0.496307	1.75613	6	0.006	0.0259707	1
88	GO_NEGATIVE_REGULATION_OF_ERK1_AND_ERK2_CASCADE	52	0.451286	1.75606	6	0.006	0.0259707	1
282	GO_REGULATION_OF_MAPK_CASCADE	660	0.321519	1.7553	23	0.023	0.0686981	1
581	GO_NEGATIVE_REGULATION_OF_VIRAL_PROCESS	89	0.410179	1.75468	7	0.007	0.0289643	1
3408	GO_ACTIVATION_OF_INNATE_IMMUNE_RESPONSE	204	0.36791	1.75315	0	0	0	1
2983	GO_REGULATION_OF_INTERLEUKIN_17_PRODUCTION	22	0.547035	1.75266	12	0.012	0.0428768	1
421	GO_REGULATION_OF_PHOSPHOLIPASE_C_ACTIVITY	39	0.480869	1.75221	7	0.007	0.0289643	1
1964	GO_NEGATIVE_REGULATION_OF_PROTEIN_SECRETION	108	0.394803	1.75112	4	0.004	0.0193682	1
1718	GO_B_CELL_ACTIVATION	132	0.383038	1.75041	1	0.001	0.00688824	1
4697	GO_PLATELET_DENSE_GRANULE_LUMEN	14	0.630574	1.75003	9	0.009	0.0349429	1
1839	GO_POSITIVE_REGULATION_OF_LYMPHOCYTE_MEDIATED_IMMUNITY	69	0.434279	1.74863	4	0.004	0.0193682	1
2289	GO_HEART_FORMATION	12	0.665386	1.74859	10	0.01	0.0375921	1
5731	GO_LIPASE_ACTIVITY	117	0.388129	1.74858	2	0.002	0.0116821	1
2753	GO_ACTIN_FILAMENT_POLYMERIZATION	23	0.553686	1.74793	11	0.011	0.0402268	1
3405	GO_POSITIVE_REGULATION_OF_INTERLEUKIN_2_PRODUCTION	31	0.509181	1.74678	6	0.006	0.0259707	1
1258	GO_B_CELL_MEDIATED_IMMUNITY	99	0.421248	1.74657	5	0.005	0.0228809	1
1118	GO_RESPONSE_TO_INTERFERON_BETA	22	0.563418	1.74458	11	0.011	0.0402268	1
3518	GO_REGULATION_OF_CELLULAR_COMPONENT_MOVEMENT	771	0.319074	1.74446	0	0	0	1
1055	GO_CYCLIC_NUCLEOTIDE_CATABOLIC_PROCESS	17	0.593279	1.74424	12	0.012	0.0428768	1
1444	GO_REGULATION_OF_ADENYLATE_CYCLASE_ACTIVITY	70	0.426234	1.74389	1	0.001	0.00688824	1
3936	GO_REGULATION_OF_INTERFERON_ALPHA_PRODUCTION	19	0.580292	1.74299	14	0.014	0.0478279	1
2139	GO_GRANULOCYTE_ACTIVATION	21	0.556732	1.74171	6	0.006	0.0259707	1
813	GO_CELL_MATRIX_ADHESION	119	0.39027	1.74136	7	0.007	0.0289643	1
1525	GO_REGULATION_OF_GRANULOCYTE_DIFFERENTIATION	16	0.604957	1.74096	9	0.009	0.0349429	1
4143	GO_POSITIVE_REGULATION_OF_BLOOD_VESSEL_ENDOTHELIAL_CELL_MIGRATION	25	0.536172	1.74082	12	0.012	0.0428768	1
1400	GO_REGULATION_OF_RESPONSE_TO_EXTERNAL_STIMULUS	926	0.310827	1.74043	0	0	0	1
5030	GO_SIGNAL_TRANSDUCER_ACTIVITY	1731	0.30087	1.74022	0	0	0	1
302	GO_CIRCULATORY_SYSTEM_PROCESS	366	0.338588	1.73852	15	0.015	0.0501441	1
1600	GO_REGULATION_OF_TRANSCRIPTION_FACTOR_IMPORT_INTO_NUCLEUS	95	0.402585	1.73797	3	0.003	0.0157787	1
3171	GO_ESTABLISHMENT_OF_ENDOTHELIAL_BARRIER	30	0.511432	1.73741	6	0.006	0.0259707	1
5031	GO_MHC_PROTEIN_COMPLEX_BINDING	19	0.562037	1.73675	15	0.015	0.0501441	1
1666	GO_POSITIVE_REGULATION_OF_LEUKOCYTE_MIGRATION	109	0.389456	1.73635	3	0.003	0.0157787	1
5211	GO_PHOSPHATIDYLINOSITOL_PHOSPHATE_5_PHOSPHATASE_ACTIVITY	13	0.625001	1.73489	13	0.013	0.0454079	1
5347	GO_SIGNALING_RECEPTOR_ACTIVITY	1393	0.303806	1.73486	0	0	0	1
481	GO_CELLULAR_RESPONSE_TO_BIOTIC_STIMULUS	163	0.366743	1.73417	7	0.007	0.0289643	1
4478	GO_BASOLATERAL_PLASMA_MEMBRANE	211	0.357776	1.73348	1	0.001	0.00688824	1
118	GO_POSITIVE_REGULATION_OF_LYMPHOCYTE_APOPTOTIC_PROCESS	20	0.57335	1.73344	16	0.016	0.0523628	1
21	GO_FOREBRAIN_NEURON_DEVELOPMENT	34	0.496601	1.73334	12	0.012	0.0428768	1
3357	GO_NEGATIVE_REGULATION_OF_MULTICELLULAR_ORGANISMAL_METABOLIC_PROCESS	12	0.651722	1.73331	12	0.012	0.0428768	1
5251	GO_AMMONIUM_TRANSMEMBRANE_TRANSPORTER_ACTIVITY	27	0.517839	1.73287	5	0.005	0.0228809	1
4085	GO_LEUKOTRIENE_METABOLIC_PROCESS	33	0.500186	1.73261	10	0.01	0.0375921	1
2699	GO_REGULATION_OF_CYTOKINE_BIOSYNTHETIC_PROCESS	94	0.403524	1.73239	2	0.002	0.0116821	1
2882	GO_REGULATION_OF_MYOTUBE_DIFFERENTIATION	55	0.442965	1.73219	5	0.005	0.0228809	1
4937	GO_TRANSPORT_VESICLE	338	0.339542	1.73162	0	0	0	1
4445	GO_EXTRACELLULAR_MATRIX	426	0.329773	1.7316	0	0	0	1
4998	GO_PLATELET_DENSE_GRANULE	20	0.569486	1.7287	8	0.008	0.0319622	1
4444	GO_LOW_DENSITY_LIPOPROTEIN_PARTICLE	14	0.604396	1.7286	17	0.017	0.0544607	1
685	GO_POSITIVE_REGULATION_OF_CHOLESTEROL_EFFLUX	14	0.610576	1.72859	12	0.012	0.0428768	1
3686	GO_POSITIVE_REGULATION_OF_CELL_DIFFERENTIATION	823	0.310443	1.72702	0	0	0	1
1870	GO_REGULATION_OF_CHEMOKINE_SECRETION	12	0.646988	1.72634	10	0.01	0.0375921	1
2148	GO_POSITIVE_REGULATION_OF_NUCLEOTIDE_CATABOLIC_PROCESS	17	0.589464	1.7262	7	0.007	0.0289643	1
1157	GO_EXCITATORY_POSTSYNAPTIC_POTENTIAL	27	0.513874	1.72614	8	0.008	0.0319622	1
4957	GO_MEMBRANE_REGION	1134	0.305824	1.72582	0	0	0	1
5450	GO_PHOSPHOTYROSINE_BINDING	15	0.60339	1.72558	13	0.013	0.0454079	1
1868	GO_REGULATION_OF_MUSCLE_CELL_DIFFERENTIATION	152	0.370522	1.7254	0	0	0	1
81	GO_MODULATION_OF_GROWTH_OF_SYMBIONT_INVOLVED_IN_INTERACTION_WITH_HOST	16	0.596373	1.72531	15	0.015	0.0501441	1
937	GO_POSITIVE_REGULATION_OF_RECEPTOR_MEDIATED_ENDOCYTOSIS	47	0.452376	1.72494	10	0.01	0.0375921	1
2093	GO_POSITIVE_REGULATION_OF_ANTIGEN_PROCESSING_AND_PRESENTATION	16	0.59859	1.72488	7	0.007	0.0289643	1
840	GO_NEGATIVE_REGULATION_OF_TYPE_I_INTERFERON_PRODUCTION	40	0.472283	1.72252	8	0.008	0.0319622	1
3874	GO_POSITIVE_REGULATION_OF_INTERLEUKIN_10_PRODUCTION	29	0.505891	1.72183	5	0.005	0.0228809	1
1759	GO_REGULATION_OF_CARDIAC_MUSCLE_CONTRACTION_BY_CALCIUM_ION_SIGNALING	23	0.533672	1.72183	8	0.008	0.0319622	1
3289	GO_STEROL_TRANSPORT	50	0.448184	1.72164	5	0.005	0.0228809	1
2065	GO_REGULATION_OF_CHEMOKINE_PRODUCTION	65	0.42419	1.72163	4	0.004	0.0193682	1
5769	GO_ANGIOTENSIN_RECEPTOR_BINDING	12	0.636808	1.72153	13	0.013	0.0454079	1
437	GO_ACTIN_FILAMENT_BASED_PROCESS	450	0.321782	1.7213	13	0.013	0.0454079	1
1670	GO_REGULATION_OF_SECRETION	699	0.316192	1.72098	0	0	0	1
5017	GO_CYCLIC_NUCLEOTIDE_PHOSPHODIESTERASE_ACTIVITY	25	0.527122	1.72073	11	0.011	0.0402268	1
901	GO_POSITIVE_REGULATION_OF_SODIUM_ION_TRANSPORT	34	0.477264	1.72008	7	0.007	0.0289643	1
261	GO_REGULATION_OF_BLOOD_PRESSURE	169	0.369711	1.71982	10	0.01	0.0375921	1
2712	GO_REGULATION_OF_STEROL_TRANSPORT	38	0.473679	1.71933	7	0.007	0.0289643	1
447	GO_POSITIVE_REGULATION_OF_LEUKOCYTE_DEGRANULATION	18	0.572541	1.71927	10	0.01	0.0375921	1
984	GO_POSITIVE_REGULATION_OF_MACROPHAGE_DERIVED_FOAM_CELL_DIFFERENTIATION	15	0.600246	1.71838	12	0.012	0.0428768	1
1304	GO_CHOLESTEROL_EFFLUX	26	0.525999	1.71763	7	0.007	0.0289643	1
3521	GO_REGULATION_OF_INTERFERON_GAMMA_SECRETION	11	0.670924	1.71743	13	0.013	0.0454079	1
980	GO_REGULATION_OF_IMMUNOGLOBULIN_SECRETION	17	0.574322	1.71669	13	0.013	0.0454079	1
2213	GO_SMALL_GTPASE_MEDIATED_SIGNAL_TRANSDUCTION	352	0.332291	1.71433	0	0	0	1
3255	GO_ION_HOMEOSTASIS	576	0.318698	1.71366	0	0	0	1
3520	GO_CELLULAR_RESPONSE_TO_OSMOTIC_STRESS	21	0.548431	1.71313	22	0.022	0.0664492	1
4805	GO_LAMELLIPODIUM	172	0.368197	1.71161	1	0.001	0.00688824	1
3864	GO_REGULATION_OF_VIRAL_ENTRY_INTO_HOST_CELL	28	0.510484	1.71143	7	0.007	0.0289643	1
2217	GO_LIPID_TRANSLOCATION	21	0.557605	1.71018	6	0.006	0.0259707	1
3761	GO_NEGATIVE_REGULATION_OF_VIRAL_GENOME_REPLICATION	49	0.448661	1.71014	5	0.005	0.0228809	1
372	GO_STEROL_HOMEOSTASIS	59	0.432003	1.70994	9	0.009	0.0349429	1
3481	GO_TRANSMEMBRANE_RECEPTOR_PROTEIN_TYROSINE_KINASE_SIGNALING_PATHWAY	498	0.316891	1.70885	0	0	0	1
932	GO_KIDNEY_EPITHELIUM_DEVELOPMENT	125	0.380094	1.7083	10	0.01	0.0375921	1
4090	GO_REGULATION_OF_ENDOTHELIAL_CELL_PROLIFERATION	98	0.394392	1.70754	5	0.005	0.0228809	1
3233	GO_MOTILE_CILIUM_ASSEMBLY	15	0.598633	1.70733	17	0.017	0.0544607	1
987	GO_POSITIVE_REGULATION_OF_POTASSIUM_ION_TRANSPORT	38	0.478575	1.70704	6	0.006	0.0259707	1
4389	GO_FLUID_TRANSPORT	27	0.517076	1.70691	10	0.01	0.0375921	1
168	GO_PROTEIN_ACTIVATION_CASCADE	99	0.402146	1.70689	7	0.007	0.0289643	1
837	GO_ARTERY_DEVELOPMENT	75	0.415657	1.70631	8	0.008	0.0319622	1
682	GO_T_CELL_PROLIFERATION	36	0.482608	1.70506	8	0.008	0.0319622	1
5374	GO_ENZYME_ACTIVATOR_ACTIVITY	471	0.320618	1.70495	0	0	0	1
1942	GO_JNK_CASCADE	82	0.402466	1.70295	3	0.003	0.0157787	1
2479	GO_TOLL_LIKE_RECEPTOR_4_SIGNALING_PATHWAY	18	0.56674	1.70137	14	0.014	0.0478279	1
919	GO_MEMBRANE_RAFT_ORGANIZATION	17	0.578329	1.70112	14	0.014	0.0478279	1
4815	GO_CELL_CELL_JUNCTION	383	0.325403	1.70066	0	0	0	1
4092	GO_CELL_CELL_ADHESION_VIA_PLASMA_MEMBRANE_ADHESION_MOLECULES	204	0.351223	1.70064	0	0	0	1
5307	GO_STEROL_BINDING	43	0.455497	1.70037	6	0.006	0.0259707	1
2389	GO_POSITIVE_REGULATION_OF_CHEMOKINE_PRODUCTION	49	0.442657	1.7003	3	0.003	0.0157787	1
1609	GO_REGULATION_OF_INTERLEUKIN_2_BIOSYNTHETIC_PROCESS	18	0.574998	1.7001	10	0.01	0.0375921	1
4186	GO_CELL_GROWTH	135	0.370734	1.69983	2	0.002	0.0116821	1
5885	GO_CYTOKINE_RECEPTOR_BINDING	271	0.336832	1.69914	0	0	0	1
2713	GO_POSITIVE_REGULATION_OF_INTRACELLULAR_SIGNAL_TRANSDUCTION	876	0.303573	1.69832	0	0	0	1
5090	GO_SULFUR_COMPOUND_BINDING	234	0.345001	1.69828	0	0	0	1
1916	GO_RESPONSE_TO_PROTOZOAN	20	0.557849	1.69764	12	0.012	0.0428768	1
2420	GO_REGULATION_OF_REGULATORY_T_CELL_DIFFERENTIATION	13	0.628537	1.69738	16	0.016	0.0523628	1
1029	GO_VESICLE_MEDIATED_TRANSPORT	1239	0.299684	1.69706	0	0	0	1
4080	GO_REGULATION_OF_NECROPTOTIC_PROCESS	11	0.646329	1.69501	18	0.018	0.0568942	1
3301	GO_POSITIVE_REGULATION_OF_INTERFERON_ALPHA_PRODUCTION	16	0.591533	1.6944	17	0.017	0.0544607	1
3055	GO_REGULATION_OF_SUPEROXIDE_METABOLIC_PROCESS	23	0.528964	1.69404	13	0.013	0.0454079	1
4839	GO_DYNEIN_COMPLEX	43	0.460076	1.69397	4	0.004	0.0193682	1
3953	GO_POSITIVE_REGULATION_OF_INTERLEUKIN_6_PRODUCTION	68	0.413863	1.69349	6	0.006	0.0259707	1
2064	GO_NEGATIVE_REGULATION_OF_PEPTIDYL_THREONINE_PHOSPHORYLATION	15	0.592726	1.69299	15	0.015	0.0501441	1
1033	GO_REGULATION_OF_MEMBRANE_LIPID_DISTRIBUTION	37	0.476723	1.69287	6	0.006	0.0259707	1
468	GO_REGULATION_OF_HYDROLASE_ACTIVITY	1327	0.297501	1.69285	48	0.048	0.116975	1
1949	GO_NEGATIVE_REGULATION_OF_PROTEIN_ACTIVATION_CASCADE	11	0.650582	1.69205	12	0.012	0.0428768	1
4419	GO_REGULATION_OF_PRODUCTION_OF_MOLECULAR_MEDIATOR_OF_IMMUNE_RESPONSE	101	0.388384	1.69128	4	0.004	0.0193682	1
2550	GO_CALCIUM_ION_TRANSPORT	223	0.347652	1.69082	1	0.001	0.00688824	1
1914	GO_POSITIVE_REGULATION_OF_MUSCLE_HYPERTROPHY	22	0.545137	1.69076	12	0.012	0.0428768	1
1707	GO_REGULATION_OF_PEPTIDYL_TYROSINE_PHOSPHORYLATION	213	0.34542	1.69062	1	0.001	0.00688824	1
1201	GO_ORGANIC_HYDROXY_COMPOUND_TRANSPORT	155	0.361267	1.69013	3	0.003	0.0157787	1
1858	GO_POSITIVE_REGULATION_OF_PHOSPHORUS_METABOLIC_PROCESS	1036	0.300518	1.68939	0	0	0	1
2099	GO_RENAL_WATER_HOMEOSTASIS	34	0.485172	1.68904	5	0.005	0.0228809	1
3444	GO_POSITIVE_REGULATION_OF_DEVELOPMENTAL_PROCESS	1142	0.297818	1.68631	0	0	0	1
2381	GO_NEGATIVE_REGULATION_OF_SECRETION	200	0.345893	1.68624	0	0	0	1
4363	GO_REGULATION_OF_CELL_MORPHOGENESIS	552	0.315288	1.68584	0	0	0	1
368	GO_REGULATION_OF_ENDOTHELIAL_CELL_APOPTOTIC_PROCESS	42	0.463524	1.68543	9	0.009	0.0349429	1
3906	GO_DEFINITIVE_HEMOPOIESIS	17	0.579093	1.68479	18	0.018	0.0568942	1
3101	GO_MACROPHAGE_DIFFERENTIATION	19	0.553295	1.68474	21	0.021	0.0639511	1
4645	GO_AXONAL_GROWTH_CONE	20	0.545831	1.68466	16	0.016	0.0523628	1
3070	GO_REGULATION_OF_ANATOMICAL_STRUCTURE_MORPHOGENESIS	1021	0.298757	1.68445	0	0	0	1
1896	GO_RAS_PROTEIN_SIGNAL_TRANSDUCTION	143	0.363856	1.68395	3	0.003	0.0157787	1
4017	GO_CELLULAR_RESPONSE_TO_MECHANICAL_STIMULUS	80	0.404335	1.6839	4	0.004	0.0193682	1
3719	GO_REGULATION_OF_ION_TRANSPORT	592	0.313531	1.68254	0	0	0	1
3866	GO_POSITIVE_REGULATION_OF_SECRETION	370	0.324572	1.68172	0	0	0	1
3852	GO_REGULATION_OF_RAS_PROTEIN_SIGNAL_TRANSDUCTION	184	0.349114	1.68084	2	0.002	0.0116821	1
1382	GO_ANATOMICAL_STRUCTURE_MATURATION	39	0.467999	1.68072	7	0.007	0.0289643	1
2521	GO_REGULATION_OF_BLOOD_VESSEL_ENDOTHELIAL_CELL_MIGRATION	51	0.434063	1.67875	8	0.008	0.0319622	1
859	GO_REGULATION_OF_INTRACELLULAR_SIGNAL_TRANSDUCTION	1656	0.289593	1.67547	58	0.058	0.134953	1
851	GO_FIBRIL_ORGANIZATION	19	0.553428	1.67486	15	0.015	0.0501441	1
1655	GO_ENZYME_LINKED_RECEPTOR_PROTEIN_SIGNALING_PATHWAY	689	0.306352	1.67433	0	0	0	1
101	GO_OLFACTORY_BULB_INTERNEURON_DIFFERENTIATION	15	0.583278	1.67251	14	0.014	0.0478279	1
4987	GO_PLASMA_MEMBRANE_RAFT	86	0.392175	1.67243	4	0.004	0.0193682	1
492	GO_CGMP_METABOLIC_PROCESS	23	0.520569	1.67219	8	0.008	0.0319622	1
2765	GO_REGULATION_OF_JNK_CASCADE	159	0.355987	1.67198	1	0.001	0.00688824	1
1881	GO_POSITIVE_REGULATION_OF_T_HELPER_1_TYPE_IMMUNE_RESPONSE	15	0.595868	1.67196	16	0.016	0.0523628	1
4124	GO_REGULATION_OF_SODIUM_ION_TRANSMEMBRANE_TRANSPORT	48	0.435064	1.6709	6	0.006	0.0259707	1
1030	GO_INTERLEUKIN_1_PRODUCTION	15	0.585435	1.67082	16	0.016	0.0523628	1
3586	GO_REGULATION_OF_TRANSPORT	1804	0.288455	1.67043	0	0	0	1
504	GO_NEGATIVE_REGULATION_OF_STEM_CELL_DIFFERENTIATION	43	0.453661	1.67	9	0.009	0.0349429	1
3363	GO_RESPONSE_TO_HYDROPEROXIDE	15	0.579891	1.66847	22	0.022	0.0664492	1
3699	GO_FATTY_ACID_DERIVATIVE_BIOSYNTHETIC_PROCESS	46	0.456715	1.66771	6	0.006	0.0259707	1
1704	GO_POSITIVE_REGULATION_OF_INTERFERON_BETA_PRODUCTION	30	0.498327	1.66741	9	0.009	0.0349429	1
5565	GO_CHEMOKINE_ACTIVITY	48	0.434749	1.66706	9	0.009	0.0349429	1
3395	GO_NEGATIVE_REGULATION_OF_LEUKOCYTE_CHEMOTAXIS	13	0.59436	1.66679	23	0.023	0.0686981	1
5238	GO_R_SMAD_BINDING	23	0.527438	1.66674	20	0.02	0.0618286	1
5489	GO_ALCOHOL_TRANSMEMBRANE_TRANSPORTER_ACTIVITY	24	0.520545	1.66649	17	0.017	0.0544607	1
3512	GO_POSITIVE_REGULATION_OF_TRANSPORT	936	0.298268	1.66645	0	0	0	1
1369	GO_NEGATIVE_REGULATION_OF_TYPE_2_IMMUNE_RESPONSE	11	0.641982	1.6661	12	0.012	0.0428768	1
5253	GO_FATTY_ACID_BINDING	31	0.486691	1.66576	9	0.009	0.0349429	1
5741	GO_POLYOL_TRANSMEMBRANE_TRANSPORTER_ACTIVITY	15	0.587817	1.66459	23	0.023	0.0686981	1
4110	GO_REGULATION_OF_TYPE_I_INTERFERON_PRODUCTION	111	0.374725	1.66456	6	0.006	0.0259707	1
1760	GO_ANTIGEN_PROCESSING_AND_PRESENTATION	213	0.341668	1.66431	0	0	0	1
1728	GO_POSITIVE_REGULATION_OF_ION_TRANSPORT	236	0.336887	1.66415	1	0.001	0.00688824	1
3666	GO_ACTIVATION_OF_PROTEIN_KINASE_ACTIVITY	279	0.329992	1.66396	0	0	0	1
2570	GO_REGULATION_OF_PROTEIN_MATURATION	82	0.390878	1.6636	5	0.005	0.0228809	1
275	GO_CHEMICAL_HOMEOSTASIS	874	0.298246	1.66352	27	0.027	0.0772529	1
1608	GO_CELLULAR_RESPONSE_TO_GROWTH_HORMONE_STIMULUS	20	0.533039	1.66327	18	0.018	0.0568942	1
1062	GO_POSITIVE_REGULATION_OF_STRESS_ACTIVATED_PROTEIN_KINASE_SIGNALING_CASCADE	135	0.364773	1.66243	4	0.004	0.0193682	1
4016	GO_REGULATION_OF_NEUTROPHIL_MIGRATION	32	0.478219	1.6623	14	0.014	0.0478279	1
2933	GO_POSITIVE_REGULATION_OF_PEPTIDYL_TYROSINE_PHOSPHORYLATION	162	0.353114	1.66107	1	0.001	0.00688824	1
4299	GO_REGULATION_OF_SYNAPTIC_VESICLE_TRANSPORT	31	0.498483	1.66102	14	0.014	0.0478279	1
1447	GO_POSITIVE_REGULATION_OF_NEUTROPHIL_MIGRATION	27	0.490924	1.66078	17	0.017	0.0544607	1
3411	GO_IONOTROPIC_GLUTAMATE_RECEPTOR_SIGNALING_PATHWAY	24	0.507049	1.66049	10	0.01	0.0375921	1
4796	GO_MEMBRANE_PROTEIN_COMPLEX	1020	0.293355	1.66023	0	0	0	1
2123	GO_POSITIVE_REGULATION_OF_NF_KAPPAB_TRANSCRIPTION_FACTOR_ACTIVITY	132	0.363552	1.66022	1	0.001	0.00688824	1
2467	GO_POST_TRANSLATIONAL_PROTEIN_MODIFICATION	35	0.467323	1.65954	14	0.014	0.0478279	1
2710	GO_REGULATION_OF_B_CELL_ACTIVATION	121	0.372613	1.65921	4	0.004	0.0193682	1
2500	GO_POSITIVE_REGULATION_OF_T_HELPER_CELL_DIFFERENTIATION	18	0.56608	1.65889	16	0.016	0.0523628	1
575	GO_POSITIVE_REGULATION_OF_LOCOMOTION	420	0.315001	1.65636	14	0.014	0.0478279	1
2069	GO_NEGATIVE_REGULATION_OF_T_CELL_APOPTOTIC_PROCESS	16	0.574918	1.65568	15	0.015	0.0501441	1
3172	GO_REGULATION_OF_HUMORAL_IMMUNE_RESPONSE	52	0.435877	1.65377	6	0.006	0.0259707	1
2190	GO_REGULATION_OF_REACTIVE_OXYGEN_SPECIES_METABOLIC_PROCESS	152	0.360158	1.65375	2	0.002	0.0116821	1
846	GO_REGULATION_OF_HEART_CONTRACTION	221	0.333707	1.65362	6	0.006	0.0259707	1
1749	GO_CYTOSOLIC_CALCIUM_ION_TRANSPORT	53	0.425985	1.65271	11	0.011	0.0402268	1
1841	GO_RESPONSE_TO_TRANSFORMING_GROWTH_FACTOR_BETA	144	0.362337	1.65051	2	0.002	0.0116821	1
2430	GO_NEGATIVE_REGULATION_OF_INFLAMMATORY_RESPONSE	100	0.376336	1.65032	3	0.003	0.0157787	1
4955	GO_PROTON_TRANSPORTING_V_TYPE_ATPASE_COMPLEX	23	0.523748	1.64833	18	0.018	0.0568942	1
1954	GO_NEGATIVE_REGULATION_OF_ESTABLISHMENT_OF_PROTEIN_LOCALIZATION	209	0.336155	1.64716	3	0.003	0.0157787	1
3173	GO_REGULATION_OF_MAP_KINASE_ACTIVITY	319	0.318657	1.64706	0	0	0	1
890	GO_NEGATIVE_REGULATION_OF_EPITHELIAL_TO_MESENCHYMAL_TRANSITION	23	0.523803	1.64665	13	0.013	0.0454079	1
2606	GO_ACTIN_MEDIATED_CELL_CONTRACTION	74	0.395473	1.64612	4	0.004	0.0193682	1
439	GO_NEGATIVE_REGULATION_OF_MUSCLE_CONTRACTION	22	0.522608	1.64295	26	0.026	0.0748623	1
4320	GO_REGULATION_OF_TRANSMEMBRANE_TRANSPORT	426	0.311787	1.64279	0	0	0	1
383	GO_REGULATION_OF_COAGULATION	88	0.383855	1.64129	9	0.009	0.0349429	1
2721	GO_RESPONSE_TO_PH	42	0.450992	1.64094	11	0.011	0.0402268	1
294	GO_NEGATIVE_REGULATION_OF_CYCLIC_NUCLEOTIDE_METABOLIC_PROCESS	42	0.44942	1.64075	12	0.012	0.0428768	1
2614	GO_REGULATION_OF_PLASMA_MEMBRANE_ORGANIZATION	73	0.398012	1.64009	8	0.008	0.0319622	1
4744	GO_LATE_ENDOSOME	213	0.336535	1.63968	1	0.001	0.00688824	1
5548	GO_LIPASE_ACTIVATOR_ACTIVITY	14	0.579911	1.6396	28	0.028	0.0793088	1
785	GO_REGULATION_OF_T_HELPER_CELL_DIFFERENTIATION	26	0.496924	1.6395	12	0.012	0.0428768	1
1331	GO_POSITIVE_REGULATION_OF_T_CELL_MEDIATED_CYTOTOXICITY	16	0.56448	1.63941	22	0.022	0.0664492	1
5707	GO_PROTEIN_TYROSINE_KINASE_BINDING	54	0.424106	1.63938	9	0.009	0.0349429	1
753	GO_REGULATION_OF_STRIATED_MUSCLE_CELL_DIFFERENTIATION	85	0.394287	1.63864	8	0.008	0.0319622	1
1782	GO_POSITIVE_REGULATION_OF_TOLL_LIKE_RECEPTOR_SIGNALING_PATHWAY	19	0.546062	1.63775	24	0.024	0.0707916	1
2535	GO_GANGLIOSIDE_BIOSYNTHETIC_PROCESS	18	0.558181	1.6376	17	0.017	0.0544607	1
1047	GO_POSITIVE_REGULATION_OF_ACUTE_INFLAMMATORY_RESPONSE	28	0.488239	1.63752	20	0.02	0.0618286	1
3785	GO_REGULATION_OF_BLOOD_VOLUME_BY_RENIN_ANGIOTENSIN	11	0.629842	1.63745	25	0.025	0.0729054	1
929	GO_MYD88_DEPENDENT_TOLL_LIKE_RECEPTOR_SIGNALING_PATHWAY	32	0.468123	1.6373	22	0.022	0.0664492	1
1213	GO_POSITIVE_REGULATION_OF_FATTY_ACID_BIOSYNTHETIC_PROCESS	17	0.563337	1.63701	29	0.029	0.0811314	1
40	GO_ENDOTHELIAL_CELL_DEVELOPMENT	45	0.435196	1.637	13	0.013	0.0454079	1
5694	GO_PEPTIDOGLYCAN_BINDING	12	0.620688	1.63682	31	0.031	0.0855536	1
5128	GO_RAC_GUANYL_NUCLEOTIDE_EXCHANGE_FACTOR_ACTIVITY	13	0.60275	1.63612	28	0.028	0.0793088	1
3600	GO_T_CELL_MEDIATED_IMMUNITY	28	0.488709	1.63595	10	0.01	0.0375921	1
3935	GO_FATTY_ACID_DERIVATIVE_METABOLIC_PROCESS	96	0.378383	1.63536	4	0.004	0.0193682	1
1050	GO_ENDOTHELIAL_CELL_DIFFERENTIATION	72	0.400502	1.63384	7	0.007	0.0289643	1
5310	GO_TRANSFORMING_GROWTH_FACTOR_BETA_BINDING	16	0.563549	1.63335	28	0.028	0.0793088	1
1937	GO_PRODUCTION_OF_MOLECULAR_MEDIATOR_INVOLVED_IN_INFLAMMATORY_RESPONSE	12	0.620401	1.63321	24	0.024	0.0707916	1
879	GO_REGULATION_OF_VACUOLE_ORGANIZATION	41	0.439923	1.6327	14	0.014	0.0478279	1
5050	GO_PROTEIN_COMPLEX_SCAFFOLD	68	0.401319	1.63241	5	0.005	0.0228809	1
3964	GO_TRANSCYTOSIS	11	0.631526	1.63225	17	0.017	0.0544607	1
1147	GO_NEGATIVE_REGULATION_OF_SMALL_GTPASE_MEDIATED_SIGNAL_TRANSDUCTION	40	0.445762	1.63111	15	0.015	0.0501441	1
1879	GO_CELLULAR_RESPONSE_TO_GLUCAGON_STIMULUS	38	0.444326	1.6308	12	0.012	0.0428768	1
2085	GO_GLYCOSPHINGOLIPID_BIOSYNTHETIC_PROCESS	25	0.501731	1.63057	15	0.015	0.0501441	1
2987	GO_POSITIVE_REGULATION_OF_INTERLEUKIN_17_PRODUCTION	13	0.593276	1.62958	29	0.029	0.0811314	1
3714	GO_CYTOLYSIS	23	0.509678	1.62916	21	0.021	0.0639511	1
2575	GO_MOVEMENT_OF_CELL_OR_SUBCELLULAR_COMPONENT	1275	0.286017	1.62862	0	0	0	1
657	GO_NEGATIVE_REGULATION_OF_CYTOKINE_PRODUCTION_INVOLVED_IN_IMMUNE_RESPONSE	22	0.518854	1.62756	18	0.018	0.0568942	1
5099	GO_COMPLEMENT_BINDING	19	0.530395	1.62751	23	0.023	0.0686981	1
1808	GO_CELLULAR_RESPONSE_TO_ORGANIC_SUBSTANCE	1848	0.281147	1.6275	0	0	0	1
5451	GO_NUCLEOSIDE_TRIPHOSPHATASE_REGULATOR_ACTIVITY	329	0.319942	1.62715	0	0	0	1
1354	GO_WATER_TRANSPORT	20	0.545579	1.62705	29	0.029	0.0811314	1
834	GO_HYPEROSMOTIC_RESPONSE	20	0.530718	1.62603	25	0.025	0.0729054	1
1198	GO_NEGATIVE_REGULATION_OF_INTRACELLULAR_SIGNAL_TRANSDUCTION	437	0.307953	1.62588	0	0	0	1
5843	GO_CELL_ADHESION_MOLECULE_BINDING	186	0.337737	1.62573	2	0.002	0.0116821	1
3351	GO_NEGATIVE_REGULATION_OF_STEROL_TRANSPORT	12	0.604187	1.62465	18	0.018	0.0568942	1
4384	GO_RECEPTOR_CLUSTERING	41	0.440169	1.62456	17	0.017	0.0544607	1
781	GO_FC_GAMMA_RECEPTOR_SIGNALING_PATHWAY	95	0.384458	1.62376	10	0.01	0.0375921	1
1170	GO_REGULATION_OF_SODIUM_ION_TRANSPORT	77	0.392944	1.62356	6	0.006	0.0259707	1
538	GO_NEURON_PROJECTION_EXTENSION_INVOLVED_IN_NEURON_PROJECTION_GUIDANCE	12	0.621119	1.62322	29	0.029	0.0811314	1
4401	GO_POSITIVE_REGULATION_OF_CELL_PROJECTION_ORGANIZATION	303	0.319414	1.62218	1	0.001	0.00688824	1
841	GO_EXTRACELLULAR_MATRIX_ASSEMBLY	16	0.564324	1.62198	23	0.023	0.0686981	1
4765	GO_INTERSTITIAL_MATRIX	14	0.599053	1.62112	28	0.028	0.0793088	1
229	GO_REGULATION_OF_TYROSINE_PHOSPHORYLATION_OF_STAT_PROTEIN	68	0.392369	1.6209	9	0.009	0.0349429	1
2758	GO_DEFENSE_RESPONSE_TO_GRAM_POSITIVE_BACTERIUM	72	0.395488	1.62062	11	0.011	0.0402268	1
4337	GO_NEGATIVE_REGULATION_OF_OSTEOCLAST_DIFFERENTIATION	25	0.503643	1.62011	18	0.018	0.0568942	1
3554	GO_UNSATURATED_FATTY_ACID_METABOLIC_PROCESS	109	0.366274	1.61892	4	0.004	0.0193682	1
5298	GO_ALCOHOL_BINDING	101	0.372682	1.6188	3	0.003	0.0157787	1
3889	GO_NEGATIVE_REGULATION_OF_MULTICELLULAR_ORGANISMAL_PROCESS	983	0.28791	1.6185	0	0	0	1
1374	GO_ORGAN_FORMATION	34	0.46781	1.61847	15	0.015	0.0501441	1
2724	GO_CELLULAR_RESPONSE_TO_EXOGENOUS_DSRNA	12	0.606169	1.61806	39	0.039	0.10139	1
4043	GO_REGULATION_OF_CAMP_METABOLIC_PROCESS	129	0.361251	1.61759	4	0.004	0.0193682	1
708	GO_VASCULAR_ENDOTHELIAL_GROWTH_FACTOR_RECEPTOR_SIGNALING_PATHWAY	74	0.388406	1.61756	11	0.011	0.0402268	1
1570	GO_POSITIVE_REGULATION_OF_RESPONSE_TO_OXIDATIVE_STRESS	15	0.571582	1.61756	24	0.024	0.0707916	1
2989	GO_MULTICELLULAR_ORGANISMAL_HOMEOSTASIS	272	0.323849	1.61695	0	0	0	1
3335	GO_REGULATION_OF_MEMBRANE_INVAGINATION	13	0.611877	1.61677	31	0.031	0.0855536	1
715	GO_REGULATION_OF_CHOLESTEROL_EFFLUX	20	0.518371	1.61666	24	0.024	0.0707916	1
4259	GO_REGULATION_OF_SMOOTH_MUSCLE_CELL_APOPTOTIC_PROCESS	14	0.574687	1.61664	20	0.02	0.0618286	1
4566	GO_APICAL_JUNCTION_COMPLEX	128	0.349969	1.6163	7	0.007	0.0289643	1
134	GO_REGULATION_OF_CELLULAR_RESPONSE_TO_GROWTH_FACTOR_STIMULUS	229	0.32722	1.61563	14	0.014	0.0478279	1
1281	GO_SECRETION	588	0.299871	1.61537	0	0	0	1
196	GO_REGULATION_OF_INFLAMMATORY_RESPONSE_TO_ANTIGENIC_STIMULUS	19	0.515509	1.61445	26	0.026	0.0748623	1
4190	GO_POSITIVE_REGULATION_OF_AXONOGENESIS	69	0.393115	1.61308	4	0.004	0.0193682	1
162	GO_REGULATION_OF_CYTOKINE_PRODUCTION_INVOLVED_IN_INFLAMMATORY_RESPONSE	18	0.532052	1.6129	19	0.019	0.0592948	1
2633	GO_BLOOD_VESSEL_REMODELING	32	0.461033	1.61215	19	0.019	0.0592948	1
5267	GO_INOSITOL_TETRAKISPHOSPHATE_PHOSPHATASE_ACTIVITY	11	0.623007	1.61157	23	0.023	0.0686981	1
5476	GO_AMIDE_BINDING	272	0.320871	1.6111	0	0	0	1
4612	GO_PERINUCLEAR_ENDOPLASMIC_RETICULUM	13	0.591802	1.61105	18	0.018	0.0568942	1
505	GO_NEGATIVE_REGULATION_OF_PRODUCTION_OF_MOLECULAR_MEDIATOR_OF_IMMUNE_RESPONSE	29	0.468459	1.60994	17	0.017	0.0544607	1
2619	GO_POSITIVE_REGULATION_OF_IMMUNOGLOBULIN_SECRETION	11	0.642585	1.60932	28	0.028	0.0793088	1
3983	GO_NEGATIVE_REGULATION_OF_LEUKOCYTE_DIFFERENTIATION	82	0.380656	1.60892	5	0.005	0.0228809	1
1562	GO_POSITIVE_REGULATION_OF_MOLECULAR_FUNCTION	1791	0.277552	1.60839	0	0	0	1
5757	GO_LIPID_BINDING	657	0.294056	1.60826	0	0	0	1
1442	GO_RESPONSE_TO_EXTERNAL_STIMULUS	1821	0.276376	1.6082	0	0	0	1
2547	GO_REGULATION_OF_CELLULAR_RESPONSE_TO_TRANSFORMING_GROWTH_FACTOR_BETA_STIMULUS	99	0.368042	1.60742	6	0.006	0.0259707	1
4698	GO_INTRACELLULAR_VESICLE	1259	0.282291	1.6072	0	0	0	1
3923	GO_ACTIVATION_OF_MAPK_ACTIVITY	137	0.345268	1.6071	2	0.002	0.0116821	1
1951	GO_REGULATION_OF_TRIGLYCERIDE_CATABOLIC_PROCESS	12	0.603512	1.60708	15	0.015	0.0501441	1
2156	GO_REGULATION_OF_MICROTUBULE_BASED_MOVEMENT	19	0.519645	1.60674	28	0.028	0.0793088	1
3824	GO_PROTEIN_AUTOPHOSPHORYLATION	192	0.331832	1.60626	0	0	0	1
2109	GO_REGULATION_OF_PSEUDOPODIUM_ASSEMBLY	14	0.58138	1.60603	18	0.018	0.0568942	1
1616	GO_CELL_DIFFERENTIATION_INVOLVED_IN_KIDNEY_DEVELOPMENT	36	0.456697	1.60566	12	0.012	0.0428768	1
3663	GO_RESPONSE_TO_MERCURY_ION	15	0.567062	1.60557	34	0.034	0.0921567	1
1734	GO_NEGATIVE_REGULATION_OF_INTERLEUKIN_10_PRODUCTION	16	0.559842	1.60555	21	0.021	0.0639511	1
969	GO_ACTIN_FILAMENT_BASED_MOVEMENT	93	0.373665	1.60402	14	0.014	0.0478279	1
552	GO_POSITIVE_REGULATION_OF_ADENYLATE_CYCLASE_ACTIVITY	48	0.421311	1.60398	12	0.012	0.0428768	1
3198	GO_REGULATION_OF_MULTI_ORGANISM_PROCESS	470	0.301696	1.60372	0	0	0	1
2245	GO_REGULATION_OF_CELL_SIZE	172	0.338264	1.60328	2	0.002	0.0116821	1
4875	GO_PLASMA_MEMBRANE_REGION	929	0.287012	1.60282	0	0	0	1
4176	GO_POSITIVE_REGULATION_OF_AMINO_ACID_TRANSPORT	14	0.569799	1.60205	31	0.031	0.0855536	1
5667	GO_GLYCOPROTEIN_BINDING	101	0.370547	1.60192	7	0.007	0.0289643	1
3821	GO_REGULATION_OF_RHO_PROTEIN_SIGNAL_TRANSDUCTION	109	0.363105	1.60151	4	0.004	0.0193682	1
4074	GO_POSITIVE_REGULATION_OF_INTERLEUKIN_2_BIOSYNTHETIC_PROCESS	12	0.607781	1.60128	29	0.029	0.0811314	1
2094	GO_NEGATIVE_REGULATION_OF_CELL_MORPHOGENESIS_INVOLVED_IN_DIFFERENTIATION	117	0.356636	1.60038	3	0.003	0.0157787	1
1492	GO_FATTY_ACID_BETA_OXIDATION_USING_ACYL_COA_OXIDASE	13	0.585761	1.59996	34	0.034	0.0921567	1
1429	GO_POSITIVE_REGULATION_OF_CATALYTIC_ACTIVITY	1518	0.277868	1.59969	0	0	0	1
2350	GO_AMINO_SUGAR_CATABOLIC_PROCESS	13	0.592071	1.59912	25	0.025	0.0729054	1
5161	GO_ACTIN_BINDING	393	0.305959	1.59876	1	0.001	0.00688824	1
2351	GO_POSITIVE_REGULATION_OF_MACROPHAGE_CHEMOTAXIS	11	0.621393	1.59672	34	0.034	0.0921567	1
3918	GO_CELLULAR_HOMEOSTASIS	676	0.291152	1.59599	0	0	0	1
607	GO_SERTOLI_CELL_DEVELOPMENT	15	0.56247	1.5958	35	0.035	0.0940059	1
2777	GO_LIPOPOLYSACCHARIDE_MEDIATED_SIGNALING_PATHWAY	31	0.459147	1.59536	16	0.016	0.0523628	1
1466	GO_NEPHRIC_DUCT_DEVELOPMENT	15	0.565866	1.5946	32	0.032	0.0877405	1
5411	GO_LIPASE_INHIBITOR_ACTIVITY	18	0.532171	1.59446	25	0.025	0.0729054	1
181	GO_REGULATION_OF_EPITHELIAL_CELL_APOPTOTIC_PROCESS	59	0.410359	1.59436	7	0.007	0.0289643	1
4321	GO_REGULATION_OF_EPITHELIAL_TO_MESENCHYMAL_TRANSITION	67	0.394405	1.59423	10	0.01	0.0375921	1
177	GO_REGULATION_OF_INTERLEUKIN_5_PRODUCTION	19	0.524311	1.59341	25	0.025	0.0729054	1
1638	GO_T_CELL_DIFFERENTIATION_INVOLVED_IN_IMMUNE_RESPONSE	29	0.474669	1.59303	26	0.026	0.0748623	1
2775	GO_RESPONSE_TO_INTERLEUKIN_6	26	0.493289	1.59295	21	0.021	0.0639511	1
5488	GO_INTEGRIN_BINDING	105	0.364157	1.59295	6	0.006	0.0259707	1
3533	GO_LENS_MORPHOGENESIS_IN_CAMERA_TYPE_EYE	19	0.522691	1.59258	29	0.029	0.0811314	1
4680	GO_PROTEINACEOUS_EXTRACELLULAR_MATRIX	356	0.309439	1.59228	0	0	0	1
3888	GO_OLFACTORY_BULB_INTERNEURON_DEVELOPMENT	11	0.618401	1.59213	36	0.036	0.0960812	1
4493	GO_ENDOSOME_LUMEN	26	0.489057	1.59171	29	0.029	0.0811314	1
1481	GO_INTRACELLULAR_SIGNAL_TRANSDUCTION	1572	0.276586	1.59164	0	0	0	1
4927	GO_MYOSIN_II_COMPLEX	25	0.491883	1.59154	24	0.024	0.0707916	1
3715	GO_REGULATION_OF_VIRAL_GENOME_REPLICATION	75	0.384705	1.59122	11	0.011	0.0402268	1
1987	GO_POSITIVE_REGULATION_OF_EXOCYTOSIS	83	0.37467	1.59041	8	0.008	0.0319622	1
3998	GO_POSITIVE_REGULATION_OF_PHOSPHATIDYLINOSITOL_3_KINASE_SIGNALING	62	0.39848	1.5895	8	0.008	0.0319622	1
3016	GO_NEGATIVE_REGULATION_OF_T_CELL_MEDIATED_IMMUNITY	16	0.541181	1.58855	38	0.038	0.0998872	1
618	GO_CEREBELLAR_PURKINJE_CELL_LAYER_FORMATION	11	0.602123	1.58826	26	0.026	0.0748623	1
3615	GO_HOMOPHILIC_CELL_ADHESION_VIA_PLASMA_MEMBRANE_ADHESION_MOLECULES	153	0.336206	1.58822	4	0.004	0.0193682	1
4267	GO_POSITIVE_REGULATION_OF_MYELOID_LEUKOCYTE_DIFFERENTIATION	50	0.412895	1.58821	17	0.017	0.0544607	1
5184	GO_TRANSMEMBRANE_RECEPTOR_PROTEIN_TYROSINE_KINASE_ACTIVITY	64	0.397908	1.5881	12	0.012	0.0428768	1
58	GO_NEGATIVE_REGULATION_OF_MAP_KINASE_ACTIVITY	73	0.383582	1.58732	13	0.013	0.0454079	1
1563	GO_POSITIVE_REGULATION_OF_REGULATED_SECRETORY_PATHWAY	49	0.419291	1.58727	17	0.017	0.0544607	1
2941	GO_RENAL_SYSTEM_VASCULATURE_DEVELOPMENT	19	0.524798	1.5869	22	0.022	0.0664492	1
3614	GO_CALCIUM_ION_TRANSMEMBRANE_TRANSPORT	159	0.338499	1.58667	6	0.006	0.0259707	1
513	GO_MEMBRANE_DEPOLARIZATION_DURING_ACTION_POTENTIAL	39	0.441143	1.5863	16	0.016	0.0523628	1
4941	GO_CILIARY_PLASM	85	0.378246	1.58624	10	0.01	0.0375921	1
5426	GO_CYSTEINE_TYPE_ENDOPEPTIDASE_INHIBITOR_ACTIVITY_INVOLVED_IN_APOPTOTIC_PROCESS	23	0.496428	1.58576	26	0.026	0.0748623	1
29	GO_POSITIVE_REGULATION_OF_CALCIUM_ION_TRANSPORT	106	0.361562	1.58555	10	0.01	0.0375921	1
4985	GO_SODIUM_POTASSIUM_EXCHANGING_ATPASE_COMPLEX	11	0.609358	1.58543	32	0.032	0.0877405	1
5297	GO_PHOSPHOLIPID_TRANSLOCATING_ATPASE_ACTIVITY	16	0.535055	1.58338	30	0.03	0.0833772	1
204	GO_REGULATION_OF_OSTEOCLAST_DIFFERENTIATION	63	0.397825	1.58333	6	0.006	0.0259707	1
3911	GO_POSITIVE_REGULATION_OF_CELL_SUBSTRATE_ADHESION	99	0.360796	1.58322	6	0.006	0.0259707	1
539	GO_PHOSPHOLIPID_DEPHOSPHORYLATION	34	0.457588	1.58288	13	0.013	0.0454079	1
2115	GO_NEGATIVE_REGULATION_OF_CHEMOTAXIS	51	0.406524	1.58283	14	0.014	0.0478279	1
762	GO_LEUKOCYTE_MEDIATED_CYTOTOXICITY	35	0.45307	1.58191	15	0.015	0.0501441	1
1798	GO_REGULATION_OF_ORGAN_GROWTH	73	0.384323	1.58151	7	0.007	0.0289643	1
5587	GO_PHOSPHATIDYLINOSITOL_3_KINASE_ACTIVITY	70	0.385123	1.58065	15	0.015	0.0501441	1
4172	GO_UNSATURATED_FATTY_ACID_BIOSYNTHETIC_PROCESS	58	0.411384	1.58037	13	0.013	0.0454079	1
19	GO_APICAL_PROTEIN_LOCALIZATION	12	0.587437	1.57979	39	0.039	0.10139	1
3220	GO_POSITIVE_REGULATION_OF_MUSCLE_TISSUE_DEVELOPMENT	56	0.40482	1.57973	15	0.015	0.0501441	1
2082	GO_REGULATION_OF_PATHWAY_RESTRICTED_SMAD_PROTEIN_PHOSPHORYLATION	60	0.393898	1.57939	11	0.011	0.0402268	1
1383	GO_REGULATION_OF_AMYLOID_PRECURSOR_PROTEIN_CATABOLIC_PROCESS	11	0.596455	1.57894	41	0.041	0.104613	1
11	GO_POSITIVE_REGULATION_OF_KINASE_ACTIVITY	482	0.296297	1.57863	20	0.02	0.0618286	1
4939	GO_ACTIN_FILAMENT	70	0.388627	1.57862	11	0.011	0.0402268	1
4227	GO_NEPHRIC_DUCT_MORPHOGENESIS	12	0.588915	1.57814	40	0.04	0.103084	1
205	GO_REGULATION_OF_PROTEIN_BINDING	168	0.336065	1.57807	4	0.004	0.0193682	1
5844	GO_RECEPTOR_BINDING	1476	0.274036	1.57776	0	0	0	1
5871	GO_PHOSPHOLIPASE_ACTIVITY	94	0.367155	1.57696	6	0.006	0.0259707	1
2494	GO_POSITIVE_REGULATION_OF_DEVELOPMENTAL_GROWTH	156	0.338165	1.57663	4	0.004	0.0193682	1
875	GO_REGULATION_OF_CIRCADIAN_SLEEP_WAKE_CYCLE	25	0.482297	1.57657	28	0.028	0.0793088	1
3561	GO_POSITIVE_REGULATION_OF_ENDOTHELIAL_CELL_APOPTOTIC_PROCESS	15	0.558818	1.57649	36	0.036	0.0960812	1
3506	GO_POSITIVE_REGULATION_OF_LIPID_BIOSYNTHETIC_PROCESS	66	0.385421	1.57646	16	0.016	0.0523628	1
3908	GO_LYMPHOCYTE_ACTIVATION_INVOLVED_IN_IMMUNE_RESPONSE	98	0.362899	1.57614	6	0.006	0.0259707	1
4894	GO_CELL_PROJECTION	1786	0.271349	1.5749	0	0	0	1
4006	GO_MESONEPHROS_DEVELOPMENT	90	0.361441	1.57455	8	0.008	0.0319622	1
4721	GO_CLATHRIN_COAT_OF_COATED_PIT	16	0.549868	1.57418	26	0.026	0.0748623	1
5698	GO_TRANSLATION_REPRESSOR_ACTIVITY	20	0.515913	1.57396	31	0.031	0.0855536	1
5011	GO_TRIGLYCERIDE_RICH_LIPOPROTEIN_PARTICLE	20	0.512137	1.57351	34	0.034	0.0921567	1
5899	GO_INOSITOL_TRISPHOSPHATE_PHOSPHATASE_ACTIVITY	11	0.596445	1.57328	44	0.044	0.109851	1
2531	GO_JAK_STAT_CASCADE_INVOLVED_IN_GROWTH_HORMONE_SIGNALING_PATHWAY	15	0.563852	1.57227	38	0.038	0.0998872	1
1985	GO_REGULATION_OF_GLUCOSE_IMPORT_IN_RESPONSE_TO_INSULIN_STIMULUS	17	0.530866	1.57219	32	0.032	0.0877405	1
3186	GO_NEGATIVE_REGULATION_OF_RESPONSE_TO_STIMULUS	1360	0.274243	1.56992	0	0	0	1
4205	GO_REGULATION_OF_POTASSIUM_ION_TRANSPORT	83	0.369303	1.56943	11	0.011	0.0402268	1
5434	GO_ATPASE_ACTIVITY_COUPLED_TO_MOVEMENT_OF_SUBSTANCES	121	0.3523	1.56879	5	0.005	0.0228809	1
914	GO_POSITIVE_REGULATION_OF_FIBROBLAST_MIGRATION	11	0.593206	1.56864	38	0.038	0.0998872	1
5155	GO_VIRUS_RECEPTOR_ACTIVITY	70	0.380959	1.56806	13	0.013	0.0454079	1
1517	GO_NEGATIVE_REGULATION_OF_TRANSPORT	458	0.29728	1.56783	0	0	0	1
2090	GO_VACUOLAR_ACIDIFICATION	15	0.555621	1.56744	40	0.04	0.103084	1
4339	GO_REGULATION_OF_BLOOD_CIRCULATION	295	0.310034	1.56695	0	0	0	1
4919	GO_GOLGI_APPARATUS	1445	0.273692	1.56689	0	0	0	1
475	GO_POSITIVE_REGULATION_OF_VACUOLE_ORGANIZATION	12	0.588178	1.56662	42	0.042	0.106384	1
4327	GO_LUNG_ALVEOLUS_DEVELOPMENT	41	0.422765	1.56621	16	0.016	0.0523628	1
1192	GO_REGULATION_OF_GLOMERULAR_FILTRATION	12	0.590174	1.56619	34	0.034	0.0921567	1
4229	GO_POSITIVE_REGULATION_OF_NEURON_PROJECTION_DEVELOPMENT	232	0.316021	1.5659	3	0.003	0.0157787	1
2137	GO_REGULATION_OF_CELLULAR_EXTRAVASATION	22	0.495852	1.56589	26	0.026	0.0748623	1
336	GO_REGULATION_OF_STRESS_ACTIVATED_PROTEIN_KINASE_SIGNALING_CASCADE	197	0.326229	1.56528	9	0.009	0.0349429	1
1299	GO_REGULATION_OF_CYCLIC_NUCLEOTIDE_METABOLIC_PROCESS	155	0.334664	1.56421	1	0.001	0.00688824	1
595	GO_NEGATIVE_REGULATION_OF_CELLULAR_RESPONSE_TO_INSULIN_STIMULUS	31	0.454165	1.5639	26	0.026	0.0748623	1
5830	GO_TRANSMEMBRANE_RECEPTOR_PROTEIN_SERINE_THREONINE_KINASE_ACTIVITY	17	0.535437	1.56349	39	0.039	0.10139	1
5882	GO_CYSTEINE_TYPE_ENDOPEPTIDASE_INHIBITOR_ACTIVITY	56	0.400193	1.56315	11	0.011	0.0402268	1
821	GO_TISSUE_HOMEOSTASIS	171	0.328538	1.56285	7	0.007	0.0289643	1
2541	GO_REGULATION_OF_T_CELL_CYTOKINE_PRODUCTION	22	0.490441	1.56282	29	0.029	0.0811314	1
4554	GO_CELL_PROJECTION_MEMBRANE	298	0.307076	1.56278	0	0	0	1
5867	GO_CYTOKINE_ACTIVITY	219	0.318239	1.56225	1	0.001	0.00688824	1
2111	GO_REGULATION_OF_RESPONSE_TO_STRESS	1468	0.271731	1.56208	0	0	0	1
4803	GO_SEMAPHORIN_RECEPTOR_COMPLEX	11	0.602076	1.55947	40	0.04	0.103084	1
2140	GO_REGULATION_OF_MACROPHAGE_CYTOKINE_PRODUCTION	12	0.592855	1.55928	30	0.03	0.0833772	1
2290	GO_RECEPTOR_INTERNALIZATION	50	0.401236	1.5588	18	0.018	0.0568942	1
5272	GO_PHOSPHORIC_DIESTER_HYDROLASE_ACTIVITY	90	0.35885	1.55773	7	0.007	0.0289643	1
4193	GO_POSITIVE_REGULATION_OF_STEROID_METABOLIC_PROCESS	23	0.480985	1.55726	20	0.02	0.0618286	1
2397	GO_REGULATION_OF_LIPOPOLYSACCHARIDE_MEDIATED_SIGNALING_PATHWAY	19	0.513334	1.55652	28	0.028	0.0793088	1
4397	GO_POSITIVE_REGULATION_OF_SODIUM_ION_TRANSMEMBRANE_TRANSPORTER_ACTIVITY	12	0.586397	1.55615	42	0.042	0.106384	1
4379	GO_NEGATIVE_REGULATION_OF_RESPONSE_TO_EXTERNAL_STIMULUS	274	0.306999	1.5561	2	0.002	0.0116821	1
1172	GO_NEGATIVE_REGULATION_OF_G_PROTEIN_COUPLED_RECEPTOR_PROTEIN_SIGNALING_PATHWAY	41	0.423456	1.55597	19	0.019	0.0592948	1
4513	GO_NEURON_PROJECTION_TERMINUS	129	0.341884	1.55558	10	0.01	0.0375921	1
1764	GO_NEPHRON_EPITHELIUM_DEVELOPMENT	93	0.363436	1.55529	8	0.008	0.0319622	1
2317	GO_OUTER_DYNEIN_ARM_ASSEMBLY	12	0.572096	1.55525	45	0.045	0.111595	1
2714	GO_NEGATIVE_REGULATION_OF_GROWTH	236	0.314939	1.55512	0	0	0	1
2166	GO_BLOOD_VESSEL_MORPHOGENESIS	364	0.300026	1.55505	0	0	0	1
944	GO_POSITIVE_REGULATION_OF_THYMOCYTE_AGGREGATION	12	0.606315	1.55476	43	0.043	0.108085	1
1876	GO_REGULATION_OF_CALCIUM_ION_IMPORT	103	0.352834	1.55471	9	0.009	0.0349429	1
2070	GO_NEGATIVE_REGULATION_OF_PHOSPHORUS_METABOLIC_PROCESS	541	0.289251	1.55338	0	0	0	1
1838	GO_REGULATION_OF_RECEPTOR_MEDIATED_ENDOCYTOSIS	78	0.37195	1.55334	14	0.014	0.0478279	1
4218	GO_DEFENSE_RESPONSE_TO_BACTERIUM	237	0.314964	1.55275	2	0.002	0.0116821	1
5585	GO_PEPTIDE_HORMONE_BINDING	36	0.428852	1.55204	20	0.02	0.0618286	1
3174	GO_NEGATIVE_REGULATION_OF_INTERLEUKIN_1_BETA_PRODUCTION	15	0.549151	1.55115	45	0.045	0.111595	1
1505	GO_COMPLEMENT_ACTIVATION	76	0.397479	1.55113	13	0.013	0.0454079	1
1518	GO_THYMOCYTE_AGGREGATION	45	0.417686	1.55053	19	0.019	0.0592948	1
2005	GO_COMPLEMENT_ACTIVATION_ALTERNATIVE_PATHWAY	13	0.568586	1.55008	38	0.038	0.0998872	1
5425	GO_MOLECULAR_FUNCTION_REGULATOR	1353	0.27244	1.55001	0	0	0	1
2292	GO_REGULATION_OF_ODONTOGENESIS	24	0.475385	1.54884	37	0.037	0.0983509	1
2588	GO_VASCULATURE_DEVELOPMENT	469	0.290491	1.54859	0	0	0	1
3375	GO_SUBSTRATE_DEPENDENT_CELL_MIGRATION	27	0.463901	1.54855	29	0.029	0.0811314	1
1560	GO_ARTERY_MORPHOGENESIS	51	0.39871	1.54758	16	0.016	0.0523628	1
3604	GO_REGULATION_OF_POTASSIUM_ION_TRANSMEMBRANE_TRANSPORT	61	0.388812	1.54677	17	0.017	0.0544607	1
4278	GO_REGULATION_OF_MONOCYTE_CHEMOTAXIS	20	0.518821	1.54596	28	0.028	0.0793088	1
1931	GO_REGULATION_OF_CELLULAR_LOCALIZATION	1277	0.272673	1.54589	0	0	0	1
4414	GO_NEGATIVE_REGULATION_OF_CELL_PROLIFERATION	643	0.283054	1.54522	0	0	0	1
704	GO_LUNG_MORPHOGENESIS	45	0.416058	1.54504	16	0.016	0.0523628	1
3517	GO_MYELOID_CELL_DIFFERENTIATION	189	0.320863	1.54379	3	0.003	0.0157787	1
17	GO_MOVEMENT_IN_ENVIRONMENT_OF_OTHER_ORGANISM_INVOLVED_IN_SYMBIOTIC_INTERACTION	87	0.363402	1.54373	16	0.016	0.0523628	1
4859	GO_APICAL_PLASMA_MEMBRANE	292	0.305536	1.54368	1	0.001	0.00688824	1
4216	GO_RESPONSE_TO_LAMINAR_FLUID_SHEAR_STRESS	14	0.552085	1.54319	43	0.043	0.108085	1
4121	GO_TRIVALENT_INORGANIC_CATION_TRANSPORT	39	0.435092	1.54289	25	0.025	0.0729054	1
1717	GO_ROSTROCAUDAL_NEURAL_TUBE_PATTERNING	12	0.572576	1.54191	51	0.051	0.122173	1
2783	GO_POSITIVE_REGULATION_OF_CAMP_METABOLIC_PROCESS	89	0.366262	1.54189	7	0.007	0.0289643	1
2372	GO_POSITIVE_REGULATION_OF_CIRCADIAN_RHYTHM	21	0.494303	1.54183	41	0.041	0.104613	1
2060	GO_REGULATION_OF_B_CELL_MEDIATED_IMMUNITY	41	0.42028	1.54145	21	0.021	0.0639511	1
4500	GO_PLATELET_ALPHA_GRANULE	75	0.37105	1.54113	16	0.016	0.0523628	1
154	GO_REGULATION_OF_PROTEIN_ACTIVATION_CASCADE	35	0.437363	1.54108	25	0.025	0.0729054	1
4404	GO_DIVALENT_INORGANIC_CATION_TRANSPORT	268	0.308288	1.53972	1	0.001	0.00688824	1
5232	GO_CALCIUM_ION_BINDING	697	0.27935	1.53957	0	0	0	1
4403	GO_EXTRACELLULAR_STRUCTURE_ORGANIZATION	304	0.302568	1.53956	1	0.001	0.00688824	1
3050	GO_REGULATION_OF_RESPONSE_TO_BIOTIC_STIMULUS	237	0.312008	1.53929	1	0.001	0.00688824	1
451	GO_CELL_PROJECTION_ASSEMBLY	264	0.307792	1.53926	14	0.014	0.0478279	1
5604	GO_PHOSPHATIDYLINOSITOL_3_KINASE_BINDING	30	0.453872	1.53902	27	0.027	0.0772529	1
1827	GO_REGULATION_OF_SYMBIOSIS_ENCOMPASSING_MUTUALISM_THROUGH_PARASITISM	205	0.316581	1.53865	3	0.003	0.0157787	1
2679	GO_TRANSFORMING_GROWTH_FACTOR_BETA_RECEPTOR_SIGNALING_PATHWAY	95	0.357959	1.53831	9	0.009	0.0349429	1
4005	GO_MYELOID_DENDRITIC_CELL_ACTIVATION	26	0.461654	1.53696	38	0.038	0.0998872	1
5831	GO_G_PROTEIN_COUPLED_RECEPTOR_BINDING	259	0.304349	1.53668	1	0.001	0.00688824	1
370	GO_REGULATION_OF_SKELETAL_MUSCLE_CELL_DIFFERENTIATION	17	0.519719	1.53535	51	0.051	0.122173	1
4065	GO_RESPONSE_TO_MECHANICAL_STIMULUS	210	0.312719	1.53491	4	0.004	0.0193682	1
850	GO_REGULATION_OF_BROWN_FAT_CELL_DIFFERENTIATION	12	0.577285	1.5345	51	0.051	0.122173	1
5007	GO_ORGANELLE_SUBCOMPARTMENT	311	0.30199	1.53325	1	0.001	0.00688824	1
3552	GO_NEGATIVE_REGULATION_OF_ENDOTHELIAL_CELL_MIGRATION	39	0.425775	1.53311	23	0.023	0.0686981	1
4763	GO_AXONEME_PART	23	0.487444	1.53236	38	0.038	0.0998872	1
3762	GO_ANGIOGENESIS	293	0.300121	1.53221	0	0	0	1
4149	GO_NEGATIVE_REGULATION_OF_TUMOR_NECROSIS_FACTOR_SUPERFAMILY_CYTOKINE_PRODUCTION	44	0.408073	1.53217	17	0.017	0.0544607	1
1548	GO_REGULATION_OF_SYNAPTIC_PLASTICITY	140	0.33129	1.53163	3	0.003	0.0157787	1
4520	GO_GLYCOPROTEIN_COMPLEX	21	0.495691	1.5314	38	0.038	0.0998872	1
3390	GO_NEGATIVE_REGULATION_OF_GTPASE_ACTIVITY	42	0.423192	1.53077	25	0.025	0.0729054	1
4702	GO_CLATHRIN_VESICLE_COAT	23	0.481689	1.53043	29	0.029	0.0811314	1
4437	GO_FILOPODIUM	94	0.354979	1.52957	13	0.013	0.0454079	1
2244	GO_PHAGOSOME_ACIDIFICATION	27	0.466493	1.52908	38	0.038	0.0998872	1
130	GO_REGULATION_OF_VESICLE_FUSION	62	0.379687	1.529	26	0.026	0.0748623	1
1664	GO_VASOCONSTRICTION	28	0.453582	1.52881	33	0.033	0.0901898	1
5688	GO_CALCIUM_DEPENDENT_PROTEIN_KINASE_ACTIVITY	12	0.579787	1.52856	48	0.048	0.116975	1
448	GO_SODIUM_ION_TRANSMEMBRANE_TRANSPORT	90	0.359648	1.52848	13	0.013	0.0454079	1
2159	GO_NEGATIVE_REGULATION_OF_MYOBLAST_DIFFERENTIATION	24	0.463849	1.52815	36	0.036	0.0960812	1
3059	GO_PHOSPHOLIPID_TRANSPORT	58	0.389003	1.52772	16	0.016	0.0523628	1
5301	GO_GLUTAMATE_RECEPTOR_ACTIVITY	27	0.462412	1.52757	32	0.032	0.0877405	1
3141	GO_NEGATIVE_REGULATION_OF_NF_KAPPAB_IMPORT_INTO_NUCLEUS	18	0.512867	1.52749	36	0.036	0.0960812	1
3738	GO_REGULATION_OF_CELLULAR_RESPONSE_TO_INSULIN_STIMULUS	59	0.380268	1.52746	17	0.017	0.0544607	1
5666	GO_RECEPTOR_SIGNALING_COMPLEX_SCAFFOLD_ACTIVITY	23	0.478641	1.52674	36	0.036	0.0960812	1
4361	GO_STEROID_CATABOLIC_PROCESS	24	0.475187	1.52631	41	0.041	0.104613	1
807	GO_REGULATION_OF_HEAT_GENERATION	15	0.53703	1.5262	49	0.049	0.118825	1
3870	GO_POSITIVE_REGULATION_OF_B_CELL_ACTIVATION	86	0.364692	1.52593	16	0.016	0.0523628	1
366	GO_REGULATION_OF_DEFENSE_RESPONSE_TO_VIRUS	190	0.314652	1.52572	15	0.015	0.0501441	1
2251	GO_POSITIVE_REGULATION_OF_CARDIAC_MUSCLE_TISSUE_DEVELOPMENT	29	0.459496	1.52496	37	0.037	0.0983509	1
444	GO_POSITIVE_REGULATION_OF_CELL_COMMUNICATION	1532	0.264159	1.52433	58	0.058	0.134953	1
2627	GO_GLYCEROPHOSPHOLIPID_CATABOLIC_PROCESS	13	0.561878	1.52288	52	0.052	0.123667	1
3620	GO_POSITIVE_REGULATION_OF_T_CELL_MEDIATED_IMMUNITY	32	0.44067	1.52273	28	0.028	0.0793088	1
4061	GO_REGULATION_OF_PHOSPHORUS_METABOLIC_PROCESS	1618	0.263942	1.52265	0	0	0	1
3145	GO_MONOVALENT_INORGANIC_CATION_HOMEOSTASIS	123	0.342292	1.52263	7	0.007	0.0289643	1
1498	GO_REGULATION_OF_THYMOCYTE_AGGREGATION	26	0.464162	1.52244	35	0.035	0.0940059	1
3673	GO_CELL_KILLING	56	0.393921	1.52224	25	0.025	0.0729054	1
1057	GO_POSITIVE_REGULATION_OF_TRANSMEMBRANE_TRANSPORT	131	0.333277	1.5219	7	0.007	0.0289643	1
4766	GO_EXTRACELLULAR_SPACE	1376	0.266148	1.52181	0	0	0	1
4619	GO_GOLGI_APPARATUS_PART	893	0.272348	1.5196	0	0	0	1
3616	GO_DEVELOPMENTAL_GROWTH_INVOLVED_IN_MORPHOGENESIS	104	0.345033	1.51953	14	0.014	0.0478279	1
4738	GO_GOLGI_MEMBRANE	703	0.275669	1.51908	0	0	0	1
5391	GO_BINDING_BRIDGING	173	0.32051	1.51835	7	0.007	0.0289643	1
1399	GO_REGULATION_OF_MYELOID_CELL_DIFFERENTIATION	183	0.315286	1.51834	3	0.003	0.0157787	1
606	GO_LYMPHOCYTE_HOMEOSTASIS	50	0.393143	1.51833	19	0.019	0.0592948	1
4705	GO_CELL_SUBSTRATE_JUNCTION	398	0.292049	1.51821	0	0	0	1
3241	GO_NEGATIVE_REGULATION_OF_PHOSPHORYLATION	422	0.286337	1.51795	0	0	0	1
3023	GO_POSITIVE_REGULATION_OF_CATION_TRANSMEMBRANE_TRANSPORT	97	0.351059	1.5173	12	0.012	0.0428768	1
5896	GO_GROWTH_FACTOR_BINDING	123	0.336935	1.51691	10	0.01	0.0375921	1
3981	GO_POSITIVE_REGULATION_OF_MONOCYTE_CHEMOTAXIS	15	0.527972	1.51683	52	0.052	0.123667	1
3704	GO_NITRIC_OXIDE_MEDIATED_SIGNAL_TRANSDUCTION	19	0.503375	1.51645	41	0.041	0.104613	1
3147	GO_HEART_PROCESS	85	0.361549	1.51638	17	0.017	0.0544607	1
3582	GO_REGULATION_OF_P38MAPK_CASCADE	26	0.470668	1.51636	40	0.04	0.103084	1
3796	GO_CLATHRIN_MEDIATED_ENDOCYTOSIS	35	0.424075	1.51556	28	0.028	0.0793088	1
1491	GO_REGULATION_OF_HOMEOSTATIC_PROCESS	447	0.287083	1.51542	0	0	0	1
5358	GO_PROTEIN_SERINE_THREONINE_KINASE_INHIBITOR_ACTIVITY	30	0.437345	1.51531	35	0.035	0.0940059	1
5257	GO_CATECHOLAMINE_BINDING	16	0.530591	1.51495	52	0.052	0.123667	1
3271	GO_MYD88_INDEPENDENT_TOLL_LIKE_RECEPTOR_SIGNALING_PATHWAY	30	0.445247	1.51437	28	0.028	0.0793088	1
2022	GO_REGULATION_OF_B_CELL_DIFFERENTIATION	22	0.477417	1.5138	43	0.043	0.108085	1
1806	GO_BONE_MINERALIZATION	38	0.416133	1.51191	26	0.026	0.0748623	1
860	GO_CYCLIC_NUCLEOTIDE_METABOLIC_PROCESS	57	0.385059	1.51187	15	0.015	0.0501441	1
4330	GO_RHO_PROTEIN_SIGNAL_TRANSDUCTION	50	0.394705	1.51159	29	0.029	0.0811314	1
3334	GO_CELL_PROJECTION_ORGANIZATION	902	0.269737	1.51147	0	0	0	1
950	GO_CELL_DIFFERENTIATION_INVOLVED_IN_METANEPHROS_DEVELOPMENT	11	0.584334	1.51114	50	0.05	0.120706	1
3723	GO_SIGNAL_TRANSDUCTION_BY_PROTEIN_PHOSPHORYLATION	404	0.287013	1.51099	0	0	0	1
5804	GO_RECEPTOR_SIGNALING_PROTEIN_ACTIVITY	172	0.317854	1.51027	8	0.008	0.0319622	1
137	GO_ANTIGEN_PROCESSING_AND_PRESENTATION_OF_PEPTIDE_OR_POLYSACCHARIDE_ANTIGEN_VIA_MHC_CLASS_II	94	0.348765	1.50945	21	0.021	0.0639511	1
816	GO_DEVELOPMENTAL_INDUCTION	27	0.441552	1.50843	41	0.041	0.104613	1
3332	GO_POSITIVE_REGULATION_OF_MAP_KINASE_ACTIVITY	207	0.306528	1.50837	1	0.001	0.00688824	1
2743	GO_CYTOKINE_SECRETION	38	0.425178	1.50784	26	0.026	0.0748623	1
5375	GO_SH2_DOMAIN_BINDING	29	0.445026	1.50779	37	0.037	0.0983509	1
4105	GO_REGULATION_OF_CELL_PROLIFERATION	1496	0.262518	1.50771	0	0	0	1
3700	GO_GLUTAMATE_RECEPTOR_SIGNALING_PATHWAY	41	0.405363	1.50733	24	0.024	0.0707916	1
3343	GO_NEGATIVE_REGULATION_OF_NEURAL_PRECURSOR_CELL_PROLIFERATION	21	0.486274	1.50723	35	0.035	0.0940059	1
5807	GO_DOPAMINE_RECEPTOR_BINDING	17	0.491926	1.50712	54	0.054	0.127654	1
3771	GO_POSITIVE_REGULATION_OF_VASCULAR_ENDOTHELIAL_GROWTH_FACTOR_RECEPTOR_SIGNALING_PATHWAY	16	0.508861	1.50709	45	0.045	0.111595	1
5107	GO_PROTEIN_TYROSINE_KINASE_ACTIVITY	176	0.316774	1.50682	8	0.008	0.0319622	1
3657	GO_ACTIN_CYTOSKELETON_REORGANIZATION	55	0.389813	1.50681	14	0.014	0.0478279	1
4688	GO_CORTICAL_ACTIN_CYTOSKELETON	58	0.379355	1.50662	19	0.019	0.0592948	1
3914	GO_REGULATION_OF_INTRACELLULAR_TRANSPORT	621	0.276456	1.50659	0	0	0	1
284	GO_POSITIVE_REGULATION_OF_SKELETAL_MUSCLE_TISSUE_DEVELOPMENT	26	0.456602	1.5062	41	0.041	0.104613	1
4905	GO_NEUROMUSCULAR_JUNCTION	54	0.389284	1.50594	24	0.024	0.0707916	1
888	GO_ANTIGEN_PROCESSING_AND_PRESENTATION_OF_PEPTIDE_ANTIGEN	177	0.317934	1.50574	9	0.009	0.0349429	1
553	GO_POSITIVE_REGULATION_OF_NEURON_DIFFERENTIATION	306	0.295185	1.50555	9	0.009	0.0349429	1
2798	GO_GRANULOCYTE_DIFFERENTIATION	15	0.523079	1.5054	60	0.06	0.137872	1
4719	GO_SYNAPSE	754	0.271984	1.5052	0	0	0	1
4462	GO_CELL_CELL_CONTACT_ZONE	64	0.37379	1.50503	15	0.015	0.0501441	1
4300	GO_POSITIVE_REGULATION_OF_CARDIAC_MUSCLE_CELL_DIFFERENTIATION	13	0.539542	1.50481	50	0.05	0.120706	1
2971	GO_HEART_VALVE_DEVELOPMENT	34	0.430437	1.50472	32	0.032	0.0877405	1
1414	GO_STRIATED_MUSCLE_CONTRACTION	99	0.342836	1.50456	9	0.009	0.0349429	1
4057	GO_REGULATION_OF_JUN_KINASE_ACTIVITY	81	0.358403	1.50444	19	0.019	0.0592948	1
2603	GO_CELLULAR_RESPONSE_TO_ZINC_ION	16	0.519651	1.50434	47	0.047	0.115298	1
2911	GO_NEGATIVE_REGULATION_OF_GLUCOSE_TRANSPORT	17	0.508539	1.50317	52	0.052	0.123667	1
5223	GO_PASSIVE_TRANSMEMBRANE_TRANSPORTER_ACTIVITY	464	0.280931	1.50263	0	0	0	1
1076	GO_REGULATION_OF_EXTRACELLULAR_MATRIX_ORGANIZATION	29	0.441925	1.50098	48	0.048	0.116975	1
1255	GO_POSITIVE_REGULATION_OF_PROTEIN_LOCALIZATION_TO_CELL_PERIPHERY	37	0.417384	1.50053	30	0.03	0.0833772	1
3377	GO_REGULATION_OF_SEQUENCE_SPECIFIC_DNA_BINDING_TRANSCRIPTION_FACTOR_ACTIVITY	365	0.288281	1.5002	0	0	0	1
1630	GO_PLASMA_LIPOPROTEIN_PARTICLE_CLEARANCE	21	0.479453	1.5	45	0.045	0.111595	1
3542	GO_CELL_VOLUME_HOMEOSTASIS	28	0.443971	1.49991	36	0.036	0.0960812	1
3265	GO_NEGATIVE_REGULATION_OF_MYELOID_CELL_APOPTOTIC_PROCESS	14	0.528973	1.49987	51	0.051	0.122173	1
435	GO_REGULATION_OF_SMOOTH_MUSCLE_CELL_DIFFERENTIATION	20	0.482458	1.49966	42	0.042	0.106384	1
2719	GO_RESPONSE_TO_BMP	94	0.341927	1.49924	12	0.012	0.0428768	1
479	GO_NEURON_MATURATION	30	0.445016	1.49842	34	0.034	0.0921567	1
771	GO_REGULATION_OF_OXIDOREDUCTASE_ACTIVITY	90	0.352348	1.49809	21	0.021	0.0639511	1
1482	GO_REGULATION_OF_BEHAVIOR	65	0.371774	1.49776	13	0.013	0.0454079	1
135	GO_EMBRYONIC_HEMOPOIESIS	20	0.495517	1.49748	40	0.04	0.103084	1
2946	GO_REGULATION_OF_AMINO_ACID_TRANSPORT	26	0.455109	1.49726	37	0.037	0.0983509	1
4516	GO_SECRETORY_GRANULE_LUMEN	85	0.353239	1.49725	20	0.02	0.0618286	1
5174	GO_GATED_CHANNEL_ACTIVITY	325	0.29078	1.49636	1	0.001	0.00688824	1
5328	GO_POLYSACCHARIDE_BINDING	22	0.478985	1.49549	41	0.041	0.104613	1
3570	GO_KIDNEY_MORPHOGENESIS	82	0.351712	1.4952	19	0.019	0.0592948	1
2091	GO_CELL_DIFFERENTIATION_IN_HINDBRAIN	21	0.487977	1.49463	51	0.051	0.122173	1
5355	GO_DIACYLGLYCEROL_BINDING	11	0.567008	1.49309	73	0.073	0.159682	1
2155	GO_POSITIVE_REGULATION_OF_CELL_ADHESION_MEDIATED_BY_INTEGRIN	17	0.504488	1.49308	45	0.045	0.111595	1
4012	GO_REGULATION_OF_AXONOGENESIS	168	0.316219	1.49248	11	0.011	0.0402268	1
2792	GO_REGULATION_OF_PH	89	0.351684	1.49234	21	0.021	0.0639511	1
4756	GO_NEURON_PROJECTION	942	0.26483	1.49225	0	0	0	1
2666	GO_NEGATIVE_REGULATION_OF_SMOOTH_MUSCLE_CONTRACTION	15	0.517667	1.49204	62	0.062	0.140935	1
1264	GO_BILE_ACID_BIOSYNTHETIC_PROCESS	20	0.489832	1.49198	38	0.038	0.0998872	1
8	GO_CELLULAR_RESPONSE_TO_LIPOPROTEIN_PARTICLE_STIMULUS	13	0.543791	1.49195	47	0.047	0.115298	1
4663	GO_CELL_JUNCTION	1151	0.262861	1.49176	0	0	0	1
1426	GO_REGULATION_OF_ANATOMICAL_STRUCTURE_SIZE	472	0.280274	1.49158	0	0	0	1
486	GO_REGULATION_OF_CELL_MORPHOGENESIS_INVOLVED_IN_DIFFERENTIATION	337	0.289602	1.49118	20	0.02	0.0618286	1
5005	GO_DENDRITE	451	0.280849	1.49081	0	0	0	1
2172	GO_REGULATION_OF_CELL_DIFFERENTIATION	1492	0.259461	1.49016	0	0	0	1
93	GO_REGULATION_OF_INTERFERON_BETA_PRODUCTION	44	0.40272	1.49013	25	0.025	0.0729054	1
4826	GO_ANCHORING_JUNCTION	489	0.280174	1.48935	2	0.002	0.0116821	1
3850	GO_STRIATED_MUSCLE_ADAPTATION	23	0.465585	1.4893	49	0.049	0.118825	1
1072	GO_NEGATIVE_REGULATION_OF_MAPK_CASCADE	145	0.32136	1.48888	9	0.009	0.0349429	1
4064	GO_REGULATION_OF_VASCULAR_PERMEABILITY	30	0.435412	1.48862	38	0.038	0.0998872	1
3036	GO_HUMORAL_IMMUNE_RESPONSE_MEDIATED_BY_CIRCULATING_IMMUNOGLOBULIN	69	0.389787	1.48856	22	0.022	0.0664492	1
3922	GO_PROTEIN_INSERTION_INTO_MEMBRANE	23	0.471569	1.48808	51	0.051	0.122173	1
2557	GO_POSITIVE_REGULATION_OF_NUCLEOTIDE_METABOLIC_PROCESS	133	0.329213	1.48744	10	0.01	0.0375921	1
494	GO_RETINAL_GANGLION_CELL_AXON_GUIDANCE	18	0.510157	1.48718	62	0.062	0.140935	1
2480	GO_POSITIVE_REGULATION_OF_MYELOID_CELL_DIFFERENTIATION	81	0.356634	1.48717	15	0.015	0.0501441	1
3921	GO_POSITIVE_REGULATION_OF_DEPHOSPHORYLATION	47	0.391792	1.4869	30	0.03	0.0833772	1
2652	GO_NEGATIVE_REGULATION_OF_RESPONSE_TO_CYTOKINE_STIMULUS	44	0.398576	1.48677	34	0.034	0.0921567	1
828	GO_APOPTOTIC_CELL_CLEARANCE	27	0.445275	1.48468	55	0.055	0.129398	1
1758	GO_POLYOL_TRANSPORT	18	0.499294	1.48439	60	0.06	0.137872	1
4552	GO_MYOFILAMENT	24	0.456566	1.48395	52	0.052	0.123667	1
2744	GO_POSITIVE_REGULATION_OF_OXIDOREDUCTASE_ACTIVITY	47	0.400888	1.48349	29	0.029	0.0811314	1
3467	GO_NEGATIVE_REGULATION_OF_PEPTIDYL_SERINE_PHOSPHORYLATION	24	0.463524	1.48327	48	0.048	0.116975	1
4494	GO_INTERCALATED_DISC	51	0.378748	1.48193	25	0.025	0.0729054	1
2366	GO_POSITIVE_REGULATION_OF_SODIUM_ION_TRANSMEMBRANE_TRANSPORT	17	0.512773	1.48192	67	0.067	0.150053	1
1267	GO_LIPID_HOMEOSTASIS	110	0.335543	1.48174	8	0.008	0.0319622	1
3739	GO_NEPHRON_DEVELOPMENT	115	0.328028	1.48155	10	0.01	0.0375921	1
1311	GO_REGULATION_OF_ANDROGEN_RECEPTOR_SIGNALING_PATHWAY	22	0.45855	1.48111	59	0.059	0.136422	1
1070	GO_PATHWAY_RESTRICTED_SMAD_PROTEIN_PHOSPHORYLATION	13	0.54582	1.4806	56	0.056	0.131281	1
125	GO_REGULATION_OF_VASCULOGENESIS	13	0.553184	1.48057	55	0.055	0.129398	1
422	GO_REGULATION_OF_DEVELOPMENTAL_GROWTH	289	0.294434	1.48016	12	0.012	0.0428768	1
5837	GO_PHOSPHATIDATE_PHOSPHATASE_ACTIVITY	11	0.577469	1.48	76	0.076	0.164843	1
3237	GO_POSITIVE_REGULATION_OF_SYNAPTIC_TRANSMISSION	110	0.332418	1.47993	16	0.016	0.0523628	1
4045	GO_POSITIVE_REGULATION_OF_PATHWAY_RESTRICTED_SMAD_PROTEIN_PHOSPHORYLATION	48	0.384744	1.47988	31	0.031	0.0855536	1
194	GO_NATURAL_KILLER_CELL_DIFFERENTIATION	12	0.558216	1.47979	62	0.062	0.140935	1
4850	GO_TRANS_GOLGI_NETWORK_TRANSPORT_VESICLE	27	0.443605	1.47925	37	0.037	0.0983509	1
3011	GO_POSITIVE_REGULATION_OF_PROTEIN_MODIFICATION_PROCESS	1135	0.259894	1.47909	0	0	0	1
2198	GO_MEMBRANE_DEPOLARIZATION_DURING_CARDIAC_MUSCLE_CELL_ACTION_POTENTIAL	14	0.535526	1.47905	61	0.061	0.139466	1
560	GO_CELLULAR_RESPONSE_TO_FLUID_SHEAR_STRESS	19	0.482697	1.47889	55	0.055	0.129398	1
3861	GO_REGULATION_OF_MHC_CLASS_II_BIOSYNTHETIC_PROCESS	13	0.542354	1.47789	63	0.063	0.142879	1
5893	GO_CATION_CHANNEL_ACTIVITY	298	0.287915	1.47775	1	0.001	0.00688824	1
4333	GO_ACTIVATION_OF_PROTEIN_KINASE_A_ACTIVITY	17	0.501286	1.47738	58	0.058	0.134953	1
4565	GO_VACUOLAR_PROTON_TRANSPORTING_V_TYPE_ATPASE_COMPLEX	14	0.526097	1.47637	60	0.06	0.137872	1
580	GO_REGULATION_OF_MYELOID_CELL_APOPTOTIC_PROCESS	24	0.453477	1.47605	52	0.052	0.123667	1
855	GO_POSITIVE_REGULATION_OF_BEHAVIOR	26	0.44823	1.47597	46	0.046	0.113504	1
4521	GO_COATED_PIT	67	0.363184	1.47563	23	0.023	0.0686981	1
679	GO_REGULATION_OF_CELLULAR_COMPONENT_SIZE	337	0.290441	1.47542	11	0.011	0.0402268	1
941	GO_POSITIVE_REGULATION_OF_STAT_CASCADE	73	0.353278	1.47541	22	0.022	0.0664492	1
2285	GO_REGULATION_OF_MUSCLE_HYPERTROPHY	37	0.407266	1.47521	47	0.047	0.115298	1
808	GO_REGULATION_OF_FIBROBLAST_MIGRATION	28	0.44837	1.47518	47	0.047	0.115298	1
2454	GO_DEFENSE_RESPONSE_TO_GRAM_NEGATIVE_BACTERIUM	43	0.398714	1.47516	34	0.034	0.0921567	1
2433	GO_INFLAMMATORY_RESPONSE_TO_ANTIGENIC_STIMULUS	27	0.448147	1.47472	44	0.044	0.109851	1
1692	GO_SPHINGOLIPID_METABOLIC_PROCESS	138	0.32029	1.4746	7	0.007	0.0289643	1
5907	GO_CYSTEINE_TYPE_ENDOPEPTIDASE_ACTIVITY_INVOLVED_IN_APOPTOTIC_PROCESS	15	0.520095	1.47391	66	0.066	0.148318	1
4555	GO_APICAL_PART_OF_CELL	361	0.284597	1.47354	1	0.001	0.00688824	1
1530	GO_REGULATION_OF_CELL_PROJECTION_ORGANIZATION	558	0.27354	1.47332	0	0	0	1
3960	GO_NEGATIVE_REGULATION_OF_PROTEIN_MATURATION	35	0.411626	1.4733	39	0.039	0.10139	1
5105	GO_3_5_CYCLIC_GMP_PHOSPHODIESTERASE_ACTIVITY	14	0.525741	1.47306	72	0.072	0.157962	1
591	GO_REGULATION_OF_KINASE_ACTIVITY	776	0.267155	1.47299	33	0.033	0.0901898	1
3999	GO_REGULATION_OF_FILOPODIUM_ASSEMBLY	40	0.400796	1.47296	36	0.036	0.0960812	1
104	GO_REGULATION_OF_LYASE_ACTIVITY	86	0.348311	1.47232	17	0.017	0.0544607	1
5567	GO_GLUTATHIONE_TRANSFERASE_ACTIVITY	34	0.42168	1.47224	39	0.039	0.10139	1
5535	GO_HORMONE_BINDING	65	0.366491	1.47216	24	0.024	0.0707916	1
4429	GO_POSITIVE_CHEMOTAXIS	36	0.413168	1.47161	41	0.041	0.104613	1
3902	GO_NEGATIVE_REGULATION_OF_AXONOGENESIS	65	0.363659	1.47129	24	0.024	0.0707916	1
1398	GO_CHEMICAL_HOMEOSTASIS_WITHIN_A_TISSUE	11	0.566657	1.47113	66	0.066	0.148318	1
3887	GO_NEGATIVE_REGULATION_OF_RESPONSE_TO_WOUNDING	156	0.313933	1.47094	8	0.008	0.0319622	1
5812	GO_CALCIUM_DEPENDENT_CYSTEINE_TYPE_ENDOPEPTIDASE_ACTIVITY	21	0.470565	1.47068	51	0.051	0.122173	1
3409	GO_REGULATION_OF_CELL_PROJECTION_ASSEMBLY	155	0.314614	1.47037	13	0.013	0.0454079	1
4899	GO_CELL_PROJECTION_PART	946	0.262886	1.46941	0	0	0	1
35	GO_REGULATION_OF_RESPIRATORY_BURST	14	0.536046	1.46833	69	0.069	0.153428	1
4238	GO_LOCOMOTORY_EXPLORATION_BEHAVIOR	11	0.562631	1.46802	78	0.078	0.167645	1
5609	GO_ORGANIC_CATION_TRANSMEMBRANE_TRANSPORTER_ACTIVITY	15	0.516125	1.46732	59	0.059	0.136422	1
173	GO_NEURON_RECOGNITION	33	0.423404	1.46722	47	0.047	0.115298	1
1851	GO_REGULATION_OF_TRANSFORMING_GROWTH_FACTOR_BETA_PRODUCTION	25	0.448437	1.46697	56	0.056	0.131281	1
4308	GO_VASCULAR_PROCESS_IN_CIRCULATORY_SYSTEM	163	0.314533	1.46683	13	0.013	0.0454079	1
3213	GO_NEGATIVE_REGULATION_OF_T_CELL_DIFFERENTIATION	32	0.418854	1.46573	35	0.035	0.0940059	1
2626	GO_REGULATION_OF_PROTEIN_LOCALIZATION	950	0.261741	1.46563	0	0	0	1
4199	GO_ZYMOGEN_ACTIVATION	112	0.330635	1.46556	16	0.016	0.0523628	1
2776	GO_VASCULOGENESIS	59	0.369036	1.46552	20	0.02	0.0618286	1
2742	GO_REGULATION_OF_CELL_SUBSTRATE_ADHESION	173	0.307718	1.46535	10	0.01	0.0375921	1
2050	GO_REGULATION_OF_N_METHYL_D_ASPARTATE_SELECTIVE_GLUTAMATE_RECEPTOR_ACTIVITY	15	0.515221	1.46535	64	0.064	0.144814	1
1169	GO_POSITIVE_REGULATION_OF_CELL_PROLIFERATION	814	0.265098	1.46506	0	0	0	1
466	GO_SMOOTH_MUSCLE_CELL_DIFFERENTIATION	30	0.434935	1.46481	43	0.043	0.108085	1
3121	GO_INTERACTION_WITH_SYMBIONT	52	0.380367	1.46472	35	0.035	0.0940059	1
4492	GO_TRANS_GOLGI_NETWORK_TRANSPORT_VESICLE_MEMBRANE	13	0.524531	1.46333	68	0.068	0.151832	1
4209	GO_CALCIUM_ION_IMPORT_INTO_CYTOSOL	42	0.40076	1.46324	46	0.046	0.113504	1
4469	GO_FILOPODIUM_MEMBRANE	18	0.495752	1.46305	60	0.06	0.137872	1
3944	GO_RESPONSE_TO_ISOQUINOLINE_ALKALOID	30	0.432209	1.4629	52	0.052	0.123667	1
1351	GO_REGULATION_OF_STRIATED_MUSCLE_CONTRACTION	79	0.346937	1.46241	26	0.026	0.0748623	1
5035	GO_SMAD_BINDING	72	0.352734	1.46159	19	0.019	0.0592948	1
4037	GO_POSITIVE_REGULATION_OF_INSULIN_SECRETION_INVOLVED_IN_CELLULAR_RESPONSE_TO_GLUCOSE_STIMULUS	29	0.43661	1.46155	58	0.058	0.134953	1
1947	GO_REGULATION_OF_MULTICELLULAR_ORGANISMAL_DEVELOPMENT	1672	0.254025	1.46133	0	0	0	1
3328	GO_REGULATION_OF_HYDROGEN_PEROXIDE_METABOLIC_PROCESS	15	0.511838	1.46085	71	0.071	0.156348	1
1378	GO_NEGATIVE_REGULATION_OF_TISSUE_REMODELING	17	0.501372	1.46048	62	0.062	0.140935	1
365	GO_SEROTONIN_METABOLIC_PROCESS	12	0.555259	1.46026	78	0.078	0.167645	1
1204	GO_REGULATION_OF_ACTIN_FILAMENT_BASED_PROCESS	312	0.284975	1.45995	5	0.005	0.0228809	1
3513	GO_MONOCYTE_CHEMOTAXIS	41	0.396783	1.45974	42	0.042	0.106384	1
4580	GO_CLATHRIN_COAT	46	0.388744	1.4588	44	0.044	0.109851	1
2482	GO_CELLULAR_RESPONSE_TO_NITROGEN_COMPOUND	505	0.273329	1.45878	0	0	0	1
1991	GO_GLUCOSE_IMPORT	12	0.542126	1.45871	72	0.072	0.157962	1
2267	GO_NEGATIVE_REGULATION_OF_PATHWAY_RESTRICTED_SMAD_PROTEIN_PHOSPHORYLATION	11	0.549237	1.45773	87	0.087	0.182416	1
4863	GO_CELL_CORTEX	238	0.292341	1.4575	7	0.007	0.0289643	1
1853	GO_ONE_CARBON_COMPOUND_TRANSPORT	13	0.538502	1.45663	73	0.073	0.159682	1
1635	GO_RESPONSE_TO_PROSTAGLANDIN	34	0.418608	1.45633	44	0.044	0.109851	1
2183	GO_RESPONSE_TO_INTERLEUKIN_1	115	0.328899	1.45592	17	0.017	0.0544607	1
3097	GO_REGULATION_OF_CYSTEINE_TYPE_ENDOPEPTIDASE_ACTIVITY	213	0.298236	1.45581	5	0.005	0.0228809	1
5562	GO_CARBOHYDRATE_TRANSPORTER_ACTIVITY	44	0.39633	1.4557	42	0.042	0.106384	1
4538	GO_SECRETORY_VESICLE	461	0.274752	1.45424	1	0.001	0.00688824	1
2015	GO_POSITIVE_REGULATION_OF_STEM_CELL_DIFFERENTIATION	50	0.388025	1.45424	26	0.026	0.0748623	1
3427	GO_SEMAPHORIN_PLEXIN_SIGNALING_PATHWAY	36	0.406102	1.45384	48	0.048	0.116975	1
4577	GO_POSTSYNAPSE	378	0.277751	1.45374	0	0	0	1
4995	GO_CLATHRIN_ADAPTOR_COMPLEX	27	0.438496	1.45325	51	0.051	0.122173	1
1557	GO_NEGATIVE_REGULATION_OF_EPITHELIAL_CELL_APOPTOTIC_PROCESS	35	0.407684	1.45313	39	0.039	0.10139	1
3851	GO_BRANCHING_MORPHOGENESIS_OF_AN_EPITHELIAL_TUBE	131	0.31441	1.45264	16	0.016	0.0523628	1
2974	GO_PEPTIDYL_TYROSINE_MODIFICATION	186	0.303769	1.45239	14	0.014	0.0478279	1
1888	GO_ORGANELLE_MEMBRANE_FUSION	95	0.340507	1.45152	13	0.013	0.0454079	1
5908	GO_SODIUM_CHANNEL_ACTIVITY	37	0.397598	1.45068	50	0.05	0.120706	1
3575	GO_NEURON_PROJECTION_GUIDANCE	205	0.301581	1.44997	11	0.011	0.0402268	1
4179	GO_PLATELET_AGGREGATION	39	0.404277	1.44972	42	0.042	0.106384	1
2859	GO_LONG_TERM_SYNAPTIC_POTENTIATION	39	0.397933	1.44965	41	0.041	0.104613	1
748	GO_HOMEOSTATIC_PROCESS	1337	0.253176	1.44907	38	0.038	0.0998872	1
3231	GO_NEGATIVE_REGULATION_OF_LIPID_CATABOLIC_PROCESS	21	0.47446	1.449	66	0.066	0.148318	1
2774	GO_OLFACTORY_LOBE_DEVELOPMENT	36	0.405915	1.4488	41	0.041	0.104613	1
663	GO_ACTIVATION_OF_ADENYLATE_CYCLASE_ACTIVITY	39	0.40181	1.44866	43	0.043	0.108085	1
1556	GO_LIPOXYGENASE_PATHWAY	13	0.533113	1.44828	70	0.07	0.154837	1
2780	GO_REGULATION_OF_SMOOTH_MUSCLE_CELL_PROLIFERATION	100	0.332402	1.44799	22	0.022	0.0664492	1
2068	GO_PROTEIN_LIPID_COMPLEX_SUBUNIT_ORGANIZATION	36	0.40288	1.44767	35	0.035	0.0940059	1
4411	GO_ACTIVATION_OF_MAPKK_ACTIVITY	52	0.371603	1.44638	30	0.03	0.0833772	1
4197	GO_NEGATIVE_REGULATION_OF_CELL_COMMUNICATION	1192	0.254823	1.44616	0	0	0	1
2117	GO_GLOMERULUS_DEVELOPMENT	49	0.379365	1.44544	40	0.04	0.103084	1
2768	GO_DEVELOPMENTAL_PIGMENTATION	40	0.40547	1.44532	49	0.049	0.118825	1
2233	GO_POSITIVE_REGULATION_OF_AXON_EXTENSION	36	0.408409	1.44526	47	0.047	0.115298	1
4482	GO_SECRETORY_GRANULE	352	0.280315	1.44519	4	0.004	0.0193682	1
1959	GO_POSITIVE_REGULATION_OF_EPITHELIAL_CELL_APOPTOTIC_PROCESS	24	0.447934	1.44476	51	0.051	0.122173	1
4350	GO_RESPONSE_TO_CALCIUM_ION	115	0.325291	1.44451	21	0.021	0.0639511	1
2501	GO_POSITIVE_REGULATION_OF_SEQUENCE_SPECIFIC_DNA_BINDING_TRANSCRIPTION_FACTOR_ACTIVITY	228	0.295547	1.44393	10	0.01	0.0375921	1
1767	GO_REGULATION_OF_NITRIC_OXIDE_SYNTHASE_BIOSYNTHETIC_PROCESS	19	0.474159	1.44249	74	0.074	0.161274	1
356	GO_POSITIVE_REGULATION_OF_EPITHELIAL_TO_MESENCHYMAL_TRANSITION	34	0.414422	1.44181	55	0.055	0.129398	1
2886	GO_POSITIVE_REGULATION_OF_RESPONSE_TO_BIOTIC_STIMULUS	41	0.395995	1.44181	51	0.051	0.122173	1
4214	GO_MONOCYTE_DIFFERENTIATION	16	0.504253	1.44121	87	0.087	0.182416	1
4103	GO_CELLULAR_RESPONSE_TO_VASCULAR_ENDOTHELIAL_GROWTH_FACTOR_STIMULUS	30	0.424579	1.44108	55	0.055	0.129398	1
4887	GO_MAIN_AXON	58	0.362925	1.44078	35	0.035	0.0940059	1
2707	GO_NEGATIVE_REGULATION_OF_INTERLEUKIN_12_PRODUCTION	15	0.508753	1.44055	70	0.07	0.154837	1
4222	GO_MYELOID_DENDRITIC_CELL_DIFFERENTIATION	20	0.468448	1.44054	79	0.079	0.169057	1
2398	GO_CAMERA_TYPE_EYE_PHOTORECEPTOR_CELL_DIFFERENTIATION	15	0.505565	1.44034	70	0.07	0.154837	1
2773	GO_REGULATION_OF_ACTIN_FILAMENT_BUNDLE_ASSEMBLY	77	0.341913	1.44023	31	0.031	0.0855536	1
3565	GO_POSITIVE_REGULATION_OF_T_CELL_APOPTOTIC_PROCESS	15	0.524192	1.44008	76	0.076	0.164843	1
5245	GO_FAD_BINDING	14	0.516236	1.44005	77	0.077	0.166099	1
3028	GO_REGULATION_OF_ESTABLISHMENT_OF_PROTEIN_LOCALIZATION_TO_PLASMA_MEMBRANE	48	0.377989	1.43884	45	0.045	0.111595	1
3148	GO_MUSCLE_SYSTEM_PROCESS	282	0.284116	1.43853	4	0.004	0.0193682	1
4793	GO_PHOTORECEPTOR_CONNECTING_CILIUM	31	0.419181	1.43825	53	0.053	0.125742	1
619	GO_CELLULAR_RESPONSE_TO_CARBOHYDRATE_STIMULUS	74	0.352689	1.43783	28	0.028	0.0793088	1
4512	GO_PLATELET_ALPHA_GRANULE_MEMBRANE	13	0.515427	1.4372	91	0.091	0.188532	1
3951	GO_RESPONSE_TO_OSMOTIC_STRESS	63	0.356713	1.43706	23	0.023	0.0686981	1
2599	GO_POSITIVE_REGULATION_OF_CALCIUM_ION_TRANSPORT_INTO_CYTOSOL	52	0.379077	1.43686	46	0.046	0.113504	1
4480	GO_CATION_TRANSPORTING_ATPASE_COMPLEX	16	0.493261	1.43669	69	0.069	0.153428	1
2114	GO_MYOFIBRIL_ASSEMBLY	48	0.381552	1.4364	42	0.042	0.106384	1
2656	GO_FAT_CELL_DIFFERENTIATION	106	0.325361	1.43513	19	0.019	0.0592948	1
787	GO_PH_REDUCTION	39	0.394938	1.43473	57	0.057	0.133097	1
3827	GO_AMINOGLYCAN_CATABOLIC_PROCESS	68	0.352314	1.43464	33	0.033	0.0901898	1
427	GO_NEGATIVE_REGULATION_OF_BONE_RESORPTION	11	0.56115	1.43454	64	0.064	0.144814	1
3477	GO_POSITIVE_REGULATION_OF_CELL_DEVELOPMENT	472	0.270844	1.43445	3	0.003	0.0157787	1
2274	GO_INTERACTION_WITH_HOST	134	0.315627	1.43414	11	0.011	0.0402268	1
3191	GO_REGULATION_OF_BONE_RESORPTION	33	0.418845	1.43403	59	0.059	0.136422	1
4579	GO_AXON	418	0.27226	1.43342	2	0.002	0.0116821	1
4636	GO_NEURON_SPINE	121	0.321285	1.43324	19	0.019	0.0592948	1
2716	GO_REGULATION_OF_SYSTEM_PROCESS	507	0.26931	1.4332	0	0	0	1
700	GO_CELL_CELL_SIGNALING	767	0.260477	1.43283	26	0.026	0.0748623	1
3113	GO_UROGENITAL_SYSTEM_DEVELOPMENT	299	0.279837	1.43268	5	0.005	0.0228809	1
3458	GO_CELLULAR_RESPONSE_TO_INTERLEUKIN_6	22	0.448724	1.43232	65	0.065	0.146516	1
1067	GO_POSITIVE_REGULATION_OF_LIPID_TRANSPORT	51	0.380263	1.432	45	0.045	0.111595	1
5874	GO_HYDROLASE_ACTIVITY_HYDROLYZING_O_GLYCOSYL_COMPOUNDS	96	0.326015	1.43171	27	0.027	0.0772529	1
3308	GO_HYDROGEN_PEROXIDE_METABOLIC_PROCESS	30	0.422675	1.43139	64	0.064	0.144814	1
5036	GO_SYNTAXIN_1_BINDING	18	0.487323	1.43103	73	0.073	0.159682	1
3659	GO_NEGATIVE_REGULATION_OF_CD4_POSITIVE_ALPHA_BETA_T_CELL_ACTIVATION	15	0.493692	1.43027	77	0.077	0.166099	1
2670	GO_POSITIVE_REGULATION_OF_SMOOTH_MUSCLE_CELL_MIGRATION	30	0.421135	1.43002	71	0.071	0.156348	1
3030	GO_RESPONSE_TO_PARATHYROID_HORMONE	13	0.524407	1.42997	79	0.079	0.169057	1
5653	GO_OXIDOREDUCTASE_ACTIVITY_ACTING_ON_PEROXIDE_AS_ACCEPTOR	42	0.386294	1.42946	53	0.053	0.125742	1
3238	GO_CELL_RECOGNITION	148	0.309676	1.42936	16	0.016	0.0523628	1
4195	GO_BONE_MATURATION	14	0.519979	1.42762	63	0.063	0.142879	1
1239	GO_FOREBRAIN_CELL_MIGRATION	62	0.355497	1.42727	40	0.04	0.103084	1
711	GO_CARBOHYDRATE_DERIVATIVE_CATABOLIC_PROCESS	174	0.300809	1.42724	13	0.013	0.0454079	1
3298	GO_LIPOSACCHARIDE_METABOLIC_PROCESS	114	0.323222	1.42719	24	0.024	0.0707916	1
4917	GO_PERIKARYON	108	0.323412	1.42668	26	0.026	0.0748623	1
4906	GO_SOMATODENDRITIC_COMPARTMENT	650	0.259777	1.42649	1	0.001	0.00688824	1
4463	GO_MUSCLE_MYOSIN_COMPLEX	19	0.478118	1.42618	75	0.075	0.163153	1
1186	GO_REGULATION_OF_SYNAPSE_STRUCTURE_OR_ACTIVITY	232	0.289513	1.42605	11	0.011	0.0402268	1
2589	GO_POSITIVE_REGULATION_OF_PROTEIN_METABOLIC_PROCESS	1492	0.248761	1.42575	0	0	0	1
1955	GO_RENAL_TUBULE_DEVELOPMENT	78	0.345137	1.42559	41	0.041	0.104613	1
5177	GO_ACTIN_FILAMENT_BINDING	121	0.31387	1.42535	18	0.018	0.0568942	1
827	GO_THYROID_HORMONE_METABOLIC_PROCESS	16	0.490981	1.42477	78	0.078	0.167645	1
3305	GO_REGULATION_OF_ACTIN_FILAMENT_DEPOLYMERIZATION	48	0.37654	1.42462	48	0.048	0.116975	1
1651	GO_MUSCLE_CONTRACTION	233	0.284356	1.42442	10	0.01	0.0375921	1
5045	GO_3_5_CYCLIC_AMP_PHOSPHODIESTERASE_ACTIVITY	15	0.504034	1.42393	79	0.079	0.169057	1
2506	GO_RESPONSE_TO_LOW_DENSITY_LIPOPROTEIN_PARTICLE	14	0.521302	1.4231	86	0.086	0.181025	1
5794	GO_GLUTAMATE_RECEPTOR_BINDING	37	0.396455	1.42305	50	0.05	0.120706	1
1862	GO_RESPONSE_TO_AMPHETAMINE	30	0.414001	1.42303	52	0.052	0.123667	1
988	GO_POSITIVE_REGULATION_OF_NERVOUS_SYSTEM_DEVELOPMENT	437	0.269326	1.42301	19	0.019	0.0592948	1
2038	GO_REGULATION_OF_VASCULAR_ENDOTHELIAL_GROWTH_FACTOR_RECEPTOR_SIGNALING_PATHWAY	27	0.432447	1.42288	67	0.067	0.150053	1
714	GO_REGULATION_OF_MUSCLE_CONTRACTION	147	0.307608	1.42266	19	0.019	0.0592948	1
4556	GO_INTRINSIC_COMPONENT_OF_ENDOPLASMIC_RETICULUM_MEMBRANE	136	0.310878	1.42217	24	0.024	0.0707916	1
2264	GO_RESPONSE_TO_OXYGEN_CONTAINING_COMPOUND	1381	0.247763	1.42204	0	0	0	1
5474	GO_CALCIUM_ION_TRANSMEMBRANE_TRANSPORTER_ACTIVITY	128	0.310513	1.42172	15	0.015	0.0501441	1
1490	GO_PATTERNING_OF_BLOOD_VESSELS	32	0.413415	1.42117	71	0.071	0.156348	1
1341	GO_MOTOR_NEURON_AXON_GUIDANCE	27	0.422479	1.4211	77	0.077	0.166099	1
461	GO_VESICLE_ORGANIZATION	280	0.282408	1.42107	7	0.007	0.0289643	1
3138	GO_REGULATION_OF_CELL_DEATH	1472	0.246089	1.41968	0	0	0	1
5753	GO_MHC_PROTEIN_BINDING	30	0.425412	1.41962	55	0.055	0.129398	1
1559	GO_CD4_POSITIVE_ALPHA_BETA_T_CELL_ACTIVATION	34	0.40792	1.41948	62	0.062	0.140935	1
3937	GO_NEGATIVE_REGULATION_OF_INTERLEUKIN_17_PRODUCTION	11	0.53544	1.41942	90	0.09	0.18705	1
115	GO_NEGATIVE_REGULATION_OF_NEURON_APOPTOTIC_PROCESS	135	0.312576	1.4194	20	0.02	0.0618286	1
3811	GO_POSITIVE_REGULATION_OF_CYCLIC_NUCLEOTIDE_METABOLIC_PROCESS	109	0.322562	1.41938	29	0.029	0.0811314	1
3627	GO_REGULATION_OF_CARDIAC_MUSCLE_CONTRACTION	66	0.351708	1.41888	33	0.033	0.0901898	1
499	GO_POSITIVE_REGULATION_OF_CYTOKINE_PRODUCTION_INVOLVED_IN_IMMUNE_RESPONSE	30	0.417353	1.41884	69	0.069	0.153428	1
3285	GO_REGULATION_OF_CILIUM_MOVEMENT	12	0.546156	1.41716	86	0.086	0.181025	1
5723	GO_G_PROTEIN_BETA_GAMMA_SUBUNIT_COMPLEX_BINDING	21	0.455497	1.41715	74	0.074	0.161274	1
4163	GO_G_PROTEIN_COUPLED_RECEPTOR_SIGNALING_PATHWAY_COUPLED_TO_CYCLIC_NUCLEOTIDE_SECOND_MESSENGER	172	0.29898	1.41702	14	0.014	0.0478279	1
3540	GO_ACTIN_FILAMENT_ORGANIZATION	174	0.29912	1.41677	14	0.014	0.0478279	1
4968	GO_RECYCLING_ENDOSOME	131	0.308511	1.4167	24	0.024	0.0707916	1
424	GO_REGULATION_OF_SYNAPTIC_TRANSMISSION_GLUTAMATERGIC	50	0.379851	1.41634	47	0.047	0.115298	1
235	GO_B_CELL_HOMEOSTASIS	21	0.448355	1.41621	82	0.082	0.17453	1
3111	GO_HOMEOSTASIS_OF_NUMBER_OF_CELLS_WITHIN_A_TISSUE	31	0.411035	1.41592	65	0.065	0.146516	1
2057	GO_FC_RECEPTOR_SIGNALING_PATHWAY	206	0.290543	1.41586	11	0.011	0.0402268	1
3993	GO_NEGATIVE_REGULATION_OF_NEURON_DEATH	171	0.298729	1.41563	11	0.011	0.0402268	1
1195	GO_RESPONSE_TO_METAL_ION	333	0.273877	1.4148	3	0.003	0.0157787	1
3773	GO_MELANOCYTE_DIFFERENTIATION	20	0.448214	1.41436	84	0.084	0.177764	1
1247	GO_NEGATIVE_REGULATION_OF_RESPONSE_TO_BIOTIC_STIMULUS	30	0.415021	1.41425	66	0.066	0.148318	1
271	GO_POSITIVE_REGULATION_OF_ENDOTHELIAL_CELL_CHEMOTAXIS	11	0.547521	1.41391	92	0.092	0.189939	1
5663	GO_ENZYME_REGULATOR_ACTIVITY	959	0.252373	1.41348	0	0	0	1
2489	GO_SUBSTRATE_ADHESION_DEPENDENT_CELL_SPREADING	38	0.398072	1.41299	52	0.052	0.123667	1
5883	GO_PHOSPHATIDYLINOSITOL_3_4_5_TRISPHOSPHATE_BINDING	34	0.396136	1.41217	61	0.061	0.139466	1
3818	GO_REGULATION_OF_BINDING	283	0.278843	1.41156	10	0.01	0.0375921	1
3642	GO_REGULATION_OF_MUSCLE_SYSTEM_PROCESS	195	0.295094	1.41055	15	0.015	0.0501441	1
2373	GO_ECTODERMAL_PLACODE_DEVELOPMENT	15	0.493884	1.41009	84	0.084	0.177764	1
2685	GO_CD4_POSITIVE_OR_CD8_POSITIVE_ALPHA_BETA_T_CELL_LINEAGE_COMMITMENT	11	0.545258	1.40926	97	0.097	0.197437	1
2210	GO_CILIUM_OR_FLAGELLUM_DEPENDENT_CELL_MOTILITY	15	0.490764	1.4092	94	0.094	0.192923	1
4203	GO_POSITIVE_REGULATION_OF_PHOSPHATASE_ACTIVITY	28	0.417518	1.40895	65	0.065	0.146516	1
1008	GO_REGULATION_OF_T_HELPER_2_CELL_DIFFERENTIATION	11	0.542652	1.40881	105	0.105	0.20954	1
2681	GO_POSITIVE_REGULATION_OF_GROWTH	238	0.283909	1.40754	7	0.007	0.0289643	1
335	GO_POSITIVE_REGULATION_OF_TYPE_I_INTERFERON_PRODUCTION	70	0.345325	1.40716	39	0.039	0.10139	1
5446	GO_CALMODULIN_BINDING	179	0.297738	1.40704	17	0.017	0.0544607	1
14	GO_REGULATION_OF_T_CELL_RECEPTOR_SIGNALING_PATHWAY	28	0.423859	1.40694	79	0.079	0.169057	1
5457	GO_HMG_BOX_DOMAIN_BINDING	18	0.457594	1.40618	74	0.074	0.161274	1
2579	GO_SYNAPTIC_SIGNALING	424	0.268911	1.40616	1	0.001	0.00688824	1
1262	GO_SPECIFICATION_OF_SYMMETRY	117	0.313402	1.40548	15	0.015	0.0501441	1
476	GO_NEGATIVE_REGULATION_OF_PLATELET_ACTIVATION	17	0.479058	1.40545	82	0.082	0.17453	1
1386	GO_REGULATION_OF_EXTRINSIC_APOPTOTIC_SIGNALING_PATHWAY_VIA_DEATH_DOMAIN_RECEPTORS	55	0.356396	1.40539	52	0.052	0.123667	1
4519	GO_ACTIN_CYTOSKELETON	444	0.266949	1.40534	1	0.001	0.00688824	1
3722	GO_POSITIVE_REGULATION_OF_AUTOPHAGY	75	0.336839	1.40453	38	0.038	0.0998872	1
5650	GO_INTRACELLULAR_LIGAND_GATED_ION_CHANNEL_ACTIVITY	28	0.416854	1.40434	80	0.08	0.170888	1
5122	GO_STEROID_BINDING	91	0.328435	1.40421	31	0.031	0.0855536	1
3531	GO_POSITIVE_REGULATION_OF_JUN_KINASE_ACTIVITY	63	0.348829	1.4038	41	0.041	0.104613	1
2105	GO_ACTOMYOSIN_STRUCTURE_ORGANIZATION	77	0.338314	1.40366	42	0.042	0.106384	1
1531	GO_REGULATION_OF_ACTIN_FILAMENT_LENGTH	156	0.295645	1.40331	18	0.018	0.0568942	1
1061	GO_REGULATION_OF_NEUROTRANSMITTER_LEVELS	190	0.295666	1.40304	18	0.018	0.0568942	1
4273	GO_EXTRACELLULAR_FIBRIL_ORGANIZATION	13	0.512107	1.40293	96	0.096	0.196008	1
1151	GO_REGULATION_OF_GROWTH	633	0.257775	1.40286	1	0.001	0.00688824	1
4561	GO_NEURON_PART	1265	0.244204	1.40267	0	0	0	1
2215	GO_POSITIVE_REGULATION_OF_PROTEIN_SERINE_THREONINE_KINASE_ACTIVITY	289	0.277394	1.40243	4	0.004	0.0193682	1
289	GO_CORONARY_VASCULATURE_DEVELOPMENT	37	0.397005	1.40213	60	0.06	0.137872	1
4133	GO_PROTEIN_TARGETING_TO_LYSOSOME	15	0.494842	1.40197	86	0.086	0.181025	1
3296	GO_REGULATION_OF_CELL_MATRIX_ADHESION	90	0.32774	1.40177	29	0.029	0.0811314	1
4182	GO_POSITIVE_REGULATION_OF_ESTABLISHMENT_OF_PROTEIN_LOCALIZATION	514	0.261855	1.40168	1	0.001	0.00688824	1
3161	GO_T_CELL_LINEAGE_COMMITMENT	15	0.489261	1.40141	90	0.09	0.18705	1
815	GO_MATING	37	0.390591	1.4014	63	0.063	0.142879	1
5357	GO_ACTININ_BINDING	29	0.407559	1.40107	76	0.076	0.164843	1
214	GO_COGNITION	251	0.284969	1.40072	14	0.014	0.0478279	1
1344	GO_RESPONSE_TO_ENDOGENOUS_STIMULUS	1450	0.243743	1.40066	0	0	0	1
2942	GO_REGULATION_OF_PLASMA_LIPOPROTEIN_PARTICLE_LEVELS	45	0.374496	1.40036	45	0.045	0.111595	1
3781	GO_ARACHIDONIC_ACID_METABOLIC_PROCESS	50	0.365012	1.40036	44	0.044	0.109851	1
2715	GO_NEGATIVE_REGULATION_OF_MACROPHAGE_DERIVED_FOAM_CELL_DIFFERENTIATION	13	0.512475	1.40022	100	0.1	0.201808	1
3254	GO_RESPIRATORY_SYSTEM_DEVELOPMENT	197	0.292115	1.39978	16	0.016	0.0523628	1
1684	GO_NEGATIVE_REGULATION_OF_AMINE_TRANSPORT	25	0.431621	1.3996	85	0.085	0.179303	1
2010	GO_VASCULAR_SMOOTH_MUSCLE_CONTRACTION	12	0.538183	1.39956	92	0.092	0.189939	1
5465	GO_TRANSFORMING_GROWTH_FACTOR_BETA_RECEPTOR_BINDING	50	0.370439	1.39927	54	0.054	0.127654	1
1583	GO_ADHERENS_JUNCTION_ASSEMBLY	34	0.392778	1.39925	53	0.053	0.125742	1
1976	GO_REGULATION_OF_FIBROBLAST_GROWTH_FACTOR_RECEPTOR_SIGNALING_PATHWAY	25	0.428829	1.39879	80	0.08	0.170888	1
5094	GO_HEPARAN_SULFATE_SULFOTRANSFERASE_ACTIVITY	15	0.49187	1.39867	98	0.098	0.198925	1
4245	GO_CELLULAR_RESPONSE_TO_INTERFERON_BETA	15	0.492997	1.3985	95	0.095	0.194302	1
3706	GO_NEGATIVE_REGULATION_OF_ENDOTHELIAL_CELL_APOPTOTIC_PROCESS	27	0.420355	1.39841	82	0.082	0.17453	1
5821	GO_SODIUM_ION_BINDING	14	0.50186	1.39838	99	0.099	0.200268	1
2423	GO_PRESYNAPTIC_PROCESS_INVOLVED_IN_SYNAPTIC_TRANSMISSION	116	0.313766	1.39806	26	0.026	0.0748623	1
2935	GO_NEGATIVE_REGULATION_OF_HYDROLASE_ACTIVITY	397	0.26535	1.39778	3	0.003	0.0157787	1
1439	GO_REGULATION_OF_LIPID_METABOLIC_PROCESS	282	0.276398	1.39748	6	0.006	0.0259707	1
3584	GO_REGULATION_OF_PROTEIN_SERINE_THREONINE_KINASE_ACTIVITY	470	0.261518	1.39705	2	0.002	0.0116821	1
2902	GO_NEGATIVE_REGULATION_OF_EXTRINSIC_APOPTOTIC_SIGNALING_PATHWAY_VIA_DEATH_DOMAIN_RECEPTORS	34	0.40117	1.39674	68	0.068	0.151832	1
3881	GO_SERTOLI_CELL_DIFFERENTIATION	20	0.449501	1.39666	82	0.082	0.17453	1
5603	GO_GUANYL_NUCLEOTIDE_BINDING	390	0.266914	1.39628	3	0.003	0.0157787	1
5618	GO_VOLTAGE_GATED_SODIUM_CHANNEL_ACTIVITY	20	0.448054	1.3955	89	0.089	0.185558	1
4700	GO_VOLTAGE_GATED_SODIUM_CHANNEL_COMPLEX	14	0.500425	1.39526	108	0.108	0.213439	1
5275	GO_TRANSCRIPTION_FACTOR_ACTIVITY_RNA_POLYMERASE_II_DISTAL_ENHANCER_SEQUENCE_SPECIFIC_BINDING	90	0.321721	1.39518	38	0.038	0.0998872	1
1723	GO_NEGATIVE_REGULATION_OF_NF_KAPPAB_TRANSCRIPTION_FACTOR_ACTIVITY	68	0.339647	1.39507	47	0.047	0.115298	1
4787	GO_SECRETORY_GRANULE_MEMBRANE	78	0.339416	1.39454	44	0.044	0.109851	1
4970	GO_SYNAPSE_PART	610	0.254403	1.39434	1	0.001	0.00688824	1
3808	GO_RESPONSE_TO_FOLIC_ACID	15	0.490233	1.39433	98	0.098	0.198925	1
222	GO_VASCULAR_ENDOTHELIAL_GROWTH_FACTOR_SIGNALING_PATHWAY	14	0.494814	1.39423	111	0.111	0.21784	1
1727	GO_REGULATION_OF_PEPTIDE_TRANSPORT	256	0.279469	1.39405	7	0.007	0.0289643	1
2900	GO_CELLULAR_RESPONSE_TO_CALCIUM_ION	49	0.366812	1.39399	47	0.047	0.115298	1
4495	GO_LATE_ENDOSOME_MEMBRANE	105	0.318718	1.39399	29	0.029	0.0811314	1
4670	GO_PLATELET_ALPHA_GRANULE_LUMEN	55	0.357408	1.39389	49	0.049	0.118825	1
555	GO_ACTIVATION_OF_GTPASE_ACTIVITY	75	0.33359	1.39345	39	0.039	0.10139	1
3438	GO_HEART_GROWTH	26	0.416025	1.39336	84	0.084	0.177764	1
2880	GO_RESPONSE_TO_MUSCLE_ACTIVITY	20	0.454585	1.39333	79	0.079	0.169057	1
784	GO_NEUROTRANSMITTER_TRANSPORT	155	0.301022	1.39313	21	0.021	0.0639511	1
338	GO_NEGATIVE_REGULATION_OF_KINASE_ACTIVITY	250	0.27951	1.39303	17	0.017	0.0544607	1
3005	GO_CELLULAR_COMPONENT_MORPHOGENESIS	900	0.250422	1.39285	0	0	0	1
3318	GO_EPITHELIAL_CELL_DIFFERENTIATION_INVOLVED_IN_KIDNEY_DEVELOPMENT	24	0.436153	1.3919	87	0.087	0.182416	1
2338	GO_TUBE_DEVELOPMENT	552	0.258836	1.39179	2	0.002	0.0116821	1
123	GO_POSITIVE_REGULATION_OF_PROTEIN_BINDING	73	0.339905	1.39173	39	0.039	0.10139	1
1682	GO_PRIMARY_AMINO_COMPOUND_METABOLIC_PROCESS	15	0.502276	1.39169	95	0.095	0.194302	1
4415	GO_REGULATION_OF_T_CELL_MIGRATION	24	0.436644	1.39162	79	0.079	0.169057	1
4119	GO_AXON_EXTENSION	37	0.388837	1.39126	62	0.062	0.140935	1
5023	GO_BETA_CATENIN_BINDING	84	0.328782	1.39112	36	0.036	0.0960812	1
465	GO_POSITIVE_REGULATION_OF_BINDING	127	0.306357	1.39087	25	0.025	0.0729054	1
1708	GO_REGULATION_OF_NATURAL_KILLER_CELL_ACTIVATION	27	0.415773	1.39062	83	0.083	0.176215	1
4434	GO_REGULATION_OF_STEM_CELL_DIFFERENTIATION	113	0.315785	1.39004	25	0.025	0.0729054	1
1265	GO_NEGATIVE_REGULATION_OF_COAGULATION	48	0.36611	1.3897	56	0.056	0.131281	1
1768	GO_POSITIVE_REGULATION_OF_CALCIUM_ION_TRANSMEMBRANE_TRANSPORT	59	0.3489	1.38904	48	0.048	0.116975	1
3529	GO_CARDIAC_CHAMBER_FORMATION	11	0.526401	1.38891	114	0.114	0.221815	1
3169	GO_POSITIVE_REGULATION_OF_SPROUTING_ANGIOGENESIS	14	0.505296	1.38887	97	0.097	0.197437	1
3943	GO_REGULATION_OF_TISSUE_REMODELING	62	0.350347	1.38882	51	0.051	0.122173	1
2739	GO_REGULATION_OF_PHOSPHOLIPASE_A2_ACTIVITY	11	0.527095	1.38845	108	0.108	0.213439	1
3082	GO_MEMBRANE_HYPERPOLARIZATION	11	0.538618	1.38822	109	0.109	0.214841	1
1837	GO_POSITIVE_REGULATION_OF_CALCIUM_ION_TRANSMEMBRANE_TRANSPORTER_ACTIVITY	31	0.404119	1.38821	77	0.077	0.166099	1
4191	GO_TRANSMEMBRANE_RECEPTOR_PROTEIN_SERINE_THREONINE_KINASE_SIGNALING_PATHWAY	190	0.286172	1.38819	21	0.021	0.0639511	1
5729	GO_PHOSPHOLIPASE_C_ACTIVITY	31	0.401844	1.38766	78	0.078	0.167645	1
589	GO_I_KAPPAB_KINASE_NF_KAPPAB_SIGNALING	70	0.33902	1.38719	51	0.051	0.122173	1
820	GO_GANGLIOSIDE_METABOLIC_PROCESS	26	0.427927	1.38609	90	0.09	0.18705	1
1088	GO_AXON_REGENERATION	24	0.437471	1.38583	105	0.105	0.20954	1
2545	GO_REGULATION_OF_INSULIN_SECRETION_INVOLVED_IN_CELLULAR_RESPONSE_TO_GLUCOSE_STIMULUS	53	0.364129	1.3857	72	0.072	0.157962	1
5912	GO_SODIUM_ION_TRANSMEMBRANE_TRANSPORTER_ACTIVITY	136	0.30229	1.38559	28	0.028	0.0793088	1
4407	GO_NEGATIVE_REGULATION_OF_NUCLEOTIDE_METABOLIC_PROCESS	63	0.347648	1.38512	44	0.044	0.109851	1
4421	GO_POSITIVE_REGULATION_OF_OSSIFICATION	84	0.327931	1.38479	43	0.043	0.108085	1
852	GO_LONG_CHAIN_FATTY_ACID_METABOLIC_PROCESS	88	0.326455	1.38462	34	0.034	0.0921567	1
5672	GO_SOLUTE_PROTON_SYMPORTER_ACTIVITY	26	0.429894	1.38436	85	0.085	0.179303	1
2581	GO_RESPONSE_TO_LIPID	888	0.247536	1.38378	1	0.001	0.00688824	1
1307	GO_INNER_DYNEIN_ARM_ASSEMBLY	11	0.533688	1.38331	121	0.121	0.231402	1
3452	GO_REGULATION_OF_ACTIN_CYTOSKELETON_REORGANIZATION	32	0.402826	1.38328	79	0.079	0.169057	1
5130	GO_KINASE_INHIBITOR_ACTIVITY	89	0.328069	1.38326	39	0.039	0.10139	1
3988	GO_REGULATION_OF_CATION_CHANNEL_ACTIVITY	88	0.325829	1.3829	38	0.038	0.0998872	1
5032	GO_IONOTROPIC_GLUTAMATE_RECEPTOR_BINDING	23	0.43909	1.3825	82	0.082	0.17453	1
2953	GO_ENTERIC_NERVOUS_SYSTEM_DEVELOPMENT	11	0.525618	1.38246	114	0.114	0.221815	1
3613	GO_REGULATION_OF_NUCLEOTIDE_METABOLIC_PROCESS	211	0.28477	1.38239	17	0.017	0.0544607	1
2042	GO_REGULATION_OF_CELL_ADHESION_MEDIATED_BY_INTEGRIN	39	0.378387	1.38238	60	0.06	0.137872	1
3209	GO_CELLULAR_RESPONSE_TO_ENDOGENOUS_STIMULUS	1008	0.246809	1.38212	0	0	0	1
990	GO_CELLULAR_RESPONSE_TO_OXYGEN_CONTAINING_COMPOUND	799	0.249367	1.38193	27	0.027	0.0772529	1
3539	GO_REGULATION_OF_EXTENT_OF_CELL_GROWTH	101	0.31506	1.38161	48	0.048	0.116975	1
3311	GO_GLYCEROLIPID_CATABOLIC_PROCESS	37	0.389354	1.38156	65	0.065	0.146516	1
3765	GO_LYMPHOID_PROGENITOR_CELL_DIFFERENTIATION	11	0.526199	1.3815	120	0.12	0.230308	1
3648	GO_CALCIUM_INDEPENDENT_CELL_CELL_ADHESION_VIA_PLASMA_MEMBRANE_CELL_ADHESION_MOLECULES	21	0.445208	1.38139	96	0.096	0.196008	1
5382	GO_NUCLEIC_ACID_BINDING_TRANSCRIPTION_FACTOR_ACTIVITY	1199	0.241149	1.38031	0	0	0	1
105	GO_RESPONSE_TO_NITROGEN_COMPOUND	859	0.246809	1.37991	32	0.032	0.0877405	1
277	GO_METANEPHROS_DEVELOPMENT	81	0.327482	1.37986	37	0.037	0.0983509	1
1114	GO_NEUROMUSCULAR_PROCESS_CONTROLLING_BALANCE	51	0.360949	1.37909	56	0.056	0.131281	1
4130	GO_REGULATION_OF_INSULIN_RECEPTOR_SIGNALING_PATHWAY	43	0.369954	1.37853	63	0.063	0.142879	1
2847	GO_POSITIVE_REGULATION_OF_CARDIAC_MUSCLE_CELL_PROLIFERATION	19	0.45528	1.37845	106	0.106	0.210753	1
574	GO_NEGATIVE_REGULATION_OF_ATPASE_ACTIVITY	13	0.506468	1.37823	117	0.117	0.225943	1
4951	GO_CALCIUM_CHANNEL_COMPLEX	62	0.3439	1.37795	47	0.047	0.115298	1
1650	GO_NEGATIVE_REGULATION_OF_SYSTEMIC_ARTERIAL_BLOOD_PRESSURE	13	0.509377	1.3777	117	0.117	0.225943	1
2542	GO_REGULATION_OF_CHEMOKINE_BIOSYNTHETIC_PROCESS	12	0.518441	1.37751	120	0.12	0.230308	1
701	GO_NEGATIVE_REGULATION_OF_B_CELL_ACTIVATION	30	0.411649	1.37739	75	0.075	0.163153	1
5060	GO_PEPTIDASE_REGULATOR_ACTIVITY	214	0.283911	1.37725	20	0.02	0.0618286	1
1462	GO_REGULATION_OF_PLATELET_AGGREGATION	17	0.479548	1.37627	90	0.09	0.18705	1
133	GO_CARBOHYDRATE_TRANSPORT	95	0.318608	1.37621	35	0.035	0.0940059	1
2684	GO_REGULATION_OF_CYTOPLASMIC_TRANSPORT	481	0.260013	1.37571	1	0.001	0.00688824	1
2103	GO_NEGATIVE_REGULATION_OF_MYELOID_LEUKOCYTE_DIFFERENTIATION	44	0.366529	1.37554	71	0.071	0.156348	1
4367	GO_NEGATIVE_REGULATION_OF_PROTEIN_SERINE_THREONINE_KINASE_ACTIVITY	126	0.303795	1.37371	21	0.021	0.0639511	1
1051	GO_NEGATIVE_REGULATION_OF_CELLULAR_PROTEIN_LOCALIZATION	135	0.304038	1.37355	30	0.03	0.0833772	1
5171	GO_METAL_ION_TRANSMEMBRANE_TRANSPORTER_ACTIVITY	417	0.259512	1.37346	3	0.003	0.0157787	1
5214	GO_ORGANIC_HYDROXY_COMPOUND_TRANSMEMBRANE_TRANSPORTER_ACTIVITY	60	0.349487	1.3734	61	0.061	0.139466	1
5053	GO_GTPASE_ACTIVITY	246	0.279032	1.37322	21	0.021	0.0639511	1
1231	GO_CELLULAR_MONOVALENT_INORGANIC_CATION_HOMEOSTASIS	96	0.319483	1.37315	41	0.041	0.104613	1
5356	GO_PHOSPHOLIPASE_INHIBITOR_ACTIVITY	13	0.499206	1.37293	107	0.107	0.212314	1
4742	GO_ATPASE_COMPLEX	24	0.420357	1.37253	103	0.103	0.206734	1
5192	GO_LIGAND_GATED_CHANNEL_ACTIVITY	142	0.295291	1.37217	15	0.015	0.0501441	1
4587	GO_VESICLE_LUMEN	106	0.309772	1.37197	40	0.04	0.103084	1
7	GO_PLATELET_DERIVED_GROWTH_FACTOR_RECEPTOR_SIGNALING_PATHWAY	34	0.388228	1.37195	78	0.078	0.167645	1
2238	GO_REGULATION_OF_BONE_REMODELING	42	0.367429	1.37188	70	0.07	0.154837	1
3649	GO_PHOSPHOLIPID_CATABOLIC_PROCESS	30	0.403131	1.37128	85	0.085	0.179303	1
2520	GO_POSITIVE_REGULATION_OF_NUCLEOCYTOPLASMIC_TRANSPORT	121	0.303645	1.37089	32	0.032	0.0877405	1
4325	GO_LEUKOCYTE_HOMEOSTASIS	60	0.345647	1.37085	52	0.052	0.123667	1
2908	GO_REGULATION_OF_NEURON_PROJECTION_DEVELOPMENT	408	0.264269	1.36996	4	0.004	0.0193682	1
1790	GO_CILIUM_MORPHOGENESIS	207	0.283598	1.36995	18	0.018	0.0568942	1
220	GO_CELL_PART_MORPHOGENESIS	633	0.252109	1.369	25	0.025	0.0729054	1
2270	GO_POSITIVE_REGULATION_OF_T_CELL_CYTOKINE_PRODUCTION	14	0.485436	1.36883	117	0.117	0.225943	1
1493	GO_POSITIVE_REGULATION_OF_VASOCONSTRICTION	35	0.389215	1.36859	72	0.072	0.157962	1
3457	GO_REGULATION_OF_PROTEIN_MODIFICATION_PROCESS	1710	0.235565	1.36855	0	0	0	1
2816	GO_CELL_FATE_DETERMINATION	43	0.372696	1.36834	69	0.069	0.153428	1
2789	GO_REGULATION_OF_VASOCONSTRICTION	66	0.337394	1.36831	53	0.053	0.125742	1
1015	GO_SKELETAL_MUSCLE_CONTRACTION	31	0.391593	1.36739	85	0.085	0.179303	1
831	GO_NEGATIVE_REGULATION_OF_ACTIN_FILAMENT_DEPOLYMERIZATION	35	0.391735	1.36683	83	0.083	0.176215	1
5319	GO_FOLIC_ACID_BINDING	14	0.505939	1.36669	125	0.125	0.236907	1
4950	GO_ENDOPLASMIC_RETICULUM	1631	0.236659	1.36637	0	0	0	1
2368	GO_CELLULAR_RESPONSE_TO_PROSTAGLANDIN_E_STIMULUS	18	0.451428	1.36636	113	0.113	0.22074	1
4843	GO_RECYCLING_ENDOSOME_MEMBRANE	42	0.370834	1.36594	63	0.063	0.142879	1
2969	GO_CYTOKINE_PRODUCTION_INVOLVED_IN_IMMUNE_RESPONSE	17	0.459981	1.36579	108	0.108	0.213439	1
5633	GO_TRANSMEMBRANE_RECEPTOR_PROTEIN_PHOSPHATASE_ACTIVITY	17	0.469015	1.36576	105	0.105	0.20954	1
4932	GO_CLATHRIN_COAT_OF_ENDOCYTIC_VESICLE	12	0.520635	1.36544	121	0.121	0.231402	1
541	GO_METAL_ION_TRANSPORT	582	0.253158	1.3653	16	0.016	0.0523628	1
1512	GO_SMOOTH_MUSCLE_TISSUE_DEVELOPMENT	18	0.462022	1.3649	117	0.117	0.225943	1
1641	GO_NEGATIVE_REGULATION_OF_HEART_CONTRACTION	22	0.428156	1.36478	93	0.093	0.191535	1
3863	GO_NEGATIVE_REGULATION_OF_POTASSIUM_ION_TRANSMEMBRANE_TRANSPORT	21	0.437495	1.36465	108	0.108	0.213439	1
2449	GO_POSITIVE_REGULATION_OF_CELL_DEATH	605	0.252413	1.36429	0	0	0	1
2298	GO_HOMEOSTASIS_OF_NUMBER_OF_CELLS	175	0.288281	1.36399	23	0.023	0.0686981	1
4009	GO_REGULATION_OF_DENDRITE_DEVELOPMENT	120	0.302064	1.36395	35	0.035	0.0940059	1
2191	GO_REGULATION_OF_RENAL_SODIUM_EXCRETION	24	0.427476	1.36393	105	0.105	0.20954	1
5765	GO_TUMOR_NECROSIS_FACTOR_RECEPTOR_BINDING	30	0.400342	1.36333	88	0.088	0.184057	1
2663	GO_NEGATIVE_REGULATION_OF_INTERLEUKIN_8_PRODUCTION	15	0.47743	1.36281	126	0.126	0.238192	1
5743	GO_MYOSIN_BINDING	59	0.34661	1.36275	53	0.053	0.125742	1
3266	GO_NEGATIVE_REGULATION_OF_TRANSFORMING_GROWTH_FACTOR_BETA_RECEPTOR_SIGNALING_PATHWAY	66	0.337081	1.36241	53	0.053	0.125742	1
2646	GO_NEGATIVE_REGULATION_OF_GLYCOPROTEIN_METABOLIC_PROCESS	15	0.477713	1.36225	108	0.108	0.213439	1
4872	GO_PSEUDOPODIUM	17	0.460861	1.36214	114	0.114	0.221815	1
3202	GO_CYTOPLASMIC_PATTERN_RECOGNITION_RECEPTOR_SIGNALING_PATHWAY	33	0.393503	1.3619	80	0.08	0.170888	1
3276	GO_POSITIVE_REGULATION_OF_NATURAL_KILLER_CELL_ACTIVATION	18	0.456136	1.36154	108	0.108	0.213439	1
4964	GO_TERMINAL_BOUTON	64	0.335664	1.36153	54	0.054	0.127654	1
3982	GO_REGULATION_OF_CELLULAR_PH	75	0.332645	1.36137	47	0.047	0.115298	1
3978	GO_POSITIVE_REGULATION_OF_POTASSIUM_ION_TRANSMEMBRANE_TRANSPORT	27	0.418978	1.36078	91	0.091	0.188532	1
5046	GO_VOLTAGE_GATED_ION_CHANNEL_ACTIVITY	190	0.283065	1.36072	26	0.026	0.0748623	1
1975	GO_GAS_TRANSPORT	19	0.450736	1.36051	113	0.113	0.22074	1
2814	GO_POSITIVE_REGULATION_OF_RENAL_SODIUM_EXCRETION	14	0.48823	1.36005	112	0.112	0.219511	1
4402	GO_REGULATION_OF_OSSIFICATION	178	0.28117	1.35995	24	0.024	0.0707916	1
1420	GO_NEGATIVE_REGULATION_OF_INTRACELLULAR_PROTEIN_TRANSPORT	95	0.317575	1.35953	48	0.048	0.116975	1
2269	GO_POSITIVE_REGULATION_OF_PEPTIDASE_ACTIVITY	154	0.292875	1.35948	30	0.03	0.0833772	1
1721	GO_NEGATIVE_REGULATION_OF_INTERFERON_GAMMA_PRODUCTION	35	0.388259	1.35854	84	0.084	0.177764	1
596	GO_POSITIVE_REGULATION_OF_CELLULAR_EXTRAVASATION	12	0.512365	1.35848	134	0.134	0.249254	1
4253	GO_SYNCYTIUM_FORMATION	28	0.400413	1.35768	94	0.094	0.192923	1
4373	GO_CYTOSOLIC_TRANSPORT	215	0.279333	1.35762	14	0.014	0.0478279	1
4758	GO_BETA_CATENIN_DESTRUCTION_COMPLEX	14	0.48969	1.35755	119	0.119	0.229356	1
3024	GO_MORPHOGENESIS_OF_A_BRANCHING_STRUCTURE	167	0.283249	1.35747	29	0.029	0.0811314	1
4925	GO_AP_TYPE_MEMBRANE_COAT_ADAPTOR_COMPLEX	40	0.376322	1.35613	70	0.07	0.154837	1
2087	GO_CELL_COMMUNICATION_BY_ELECTRICAL_COUPLING	15	0.477582	1.35606	113	0.113	0.22074	1
2888	GO_LIPID_PHOSPHORYLATION	99	0.313845	1.35559	44	0.044	0.109851	1
2284	GO_GOLGI_TO_ENDOSOME_TRANSPORT	19	0.443335	1.35554	111	0.111	0.21784	1
5260	GO_GLUTATHIONE_PEROXIDASE_ACTIVITY	18	0.448709	1.3555	116	0.116	0.224672	1
2492	GO_NEGATIVE_REGULATION_OF_CELL_DEATH	872	0.243265	1.35541	0	0	0	1
4102	GO_CIRCULATORY_SYSTEM_DEVELOPMENT	788	0.244494	1.35509	0	0	0	1
2429	GO_EPIBOLY	23	0.427696	1.35496	99	0.099	0.200268	1
1390	GO_NEGATIVE_REGULATION_OF_MUSCLE_CELL_APOPTOTIC_PROCESS	30	0.398922	1.35489	87	0.087	0.182416	1
2563	GO_MICROTUBULE_BUNDLE_FORMATION	69	0.330771	1.35487	52	0.052	0.123667	1
1122	GO_ACTIVATION_OF_CYSTEINE_TYPE_ENDOPEPTIDASE_ACTIVITY	95	0.313039	1.35436	54	0.054	0.127654	1
872	GO_REGULATION_OF_AXON_GUIDANCE	39	0.377884	1.35422	73	0.073	0.159682	1
3460	GO_CELL_MORPHOGENESIS_INVOLVED_IN_NEURON_DIFFERENTIATION	368	0.261581	1.35415	7	0.007	0.0289643	1
2738	GO_POSITIVE_REGULATION_OF_TRANSFORMING_GROWTH_FACTOR_BETA_PRODUCTION	16	0.470054	1.35383	122	0.122	0.232863	1
3032	GO_POSITIVE_REGULATION_OF_PRODUCTION_OF_MOLECULAR_MEDIATOR_OF_IMMUNE_RESPONSE	64	0.344168	1.3538	62	0.062	0.140935	1
1769	GO_NEGATIVE_REGULATION_OF_EPITHELIAL_CELL_MIGRATION	53	0.352497	1.35319	74	0.074	0.161274	1
33	GO_REGULATION_OF_G_PROTEIN_COUPLED_RECEPTOR_PROTEIN_SIGNALING_PATHWAY	127	0.296937	1.35304	29	0.029	0.0811314	1
3492	GO_CELLULAR_RESPONSE_TO_PEPTIDE	274	0.26941	1.35304	18	0.018	0.0568942	1
4396	GO_POSITIVE_REGULATION_OF_CELL_MORPHOGENESIS_INVOLVED_IN_DIFFERENTIATION	162	0.291099	1.35294	24	0.024	0.0707916	1
592	GO_CHROMOSOME_LOCALIZATION_TO_NUCLEAR_ENVELOPE_INVOLVED_IN_HOMOLOGOUS_CHROMOSOME_SEGREGATION	11	0.531077	1.35291	134	0.134	0.249254	1
5258	GO_CALCIUM_DEPENDENT_PROTEIN_BINDING	61	0.342707	1.35282	61	0.061	0.139466	1
2848	GO_NEGATIVE_REGULATION_OF_VIRAL_ENTRY_INTO_HOST_CELL	19	0.448082	1.35254	102	0.102	0.205005	1
4813	GO_SARCOPLASM	68	0.327797	1.35245	61	0.061	0.139466	1
3190	GO_DEVELOPMENTAL_CELL_GROWTH	77	0.322243	1.35231	61	0.061	0.139466	1
1622	GO_MACROMOLECULAR_COMPLEX_REMODELING	24	0.412234	1.35163	110	0.11	0.216236	1
4307	GO_NEGATIVE_REGULATION_OF_INTRACELLULAR_TRANSPORT	143	0.293638	1.35139	33	0.033	0.0901898	1
367	GO_RESPONSE_TO_PEPTIDE	404	0.257829	1.35068	21	0.021	0.0639511	1
4601	GO_MYOSIN_FILAMENT	22	0.429188	1.35006	104	0.104	0.208176	1
2728	GO_RESPONSE_TO_ACETYLCHOLINE	18	0.447187	1.35002	106	0.106	0.210753	1
4942	GO_SPERM_FLAGELLUM	57	0.349399	1.34982	77	0.077	0.166099	1
47	GO_LIPID_MODIFICATION	210	0.276034	1.34942	16	0.016	0.0523628	1
3127	GO_ORGANIC_CATION_TRANSPORT	20	0.444882	1.34931	117	0.117	0.225943	1
3769	GO_MODULATION_OF_SYNAPTIC_TRANSMISSION	301	0.26773	1.34909	11	0.011	0.0402268	1
4529	GO_CELL_CORTEX_PART	119	0.299742	1.34773	42	0.042	0.106384	1
1359	GO_POSITIVE_REGULATION_OF_NITRIC_OXIDE_SYNTHASE_BIOSYNTHETIC_PROCESS	14	0.480555	1.34766	141	0.141	0.258376	1
4127	GO_DEVELOPMENTAL_MATURATION	193	0.278986	1.34695	23	0.023	0.0686981	1
5008	GO_CLATHRIN_COAT_OF_TRANS_GOLGI_NETWORK_VESICLE	11	0.508596	1.34634	149	0.149	0.269613	1
728	GO_POSITIVE_REGULATION_OF_HEART_GROWTH	27	0.407128	1.3461	93	0.093	0.191535	1
1475	GO_ION_TRANSMEMBRANE_TRANSPORT	822	0.242231	1.34607	2	0.002	0.0116821	1
217	GO_DISRUPTION_OF_CELLS_OF_OTHER_ORGANISM	26	0.418356	1.34586	97	0.097	0.197437	1
46	GO_ION_TRANSPORT	1262	0.236118	1.34574	43	0.043	0.108085	1
3133	GO_REGULATION_OF_PROTEIN_AUTOPHOSPHORYLATION	37	0.375917	1.3455	92	0.092	0.189939	1
3235	GO_NEGATIVE_REGULATION_OF_ALPHA_BETA_T_CELL_ACTIVATION	23	0.421638	1.34548	122	0.122	0.232863	1
4306	GO_REGULATION_OF_RESPONSE_TO_REACTIVE_OXYGEN_SPECIES	35	0.387761	1.34544	94	0.094	0.192923	1
37	GO_MEMORY	98	0.313385	1.34452	44	0.044	0.109851	1
1152	GO_CATION_TRANSPORT	796	0.242327	1.34429	1	0.001	0.00688824	1
5444	GO_GLYCOLIPID_BINDING	20	0.439553	1.34372	110	0.11	0.216236	1
1785	GO_REGULATION_OF_CLATHRIN_MEDIATED_ENDOCYTOSIS	16	0.467924	1.34367	126	0.126	0.238192	1
219	GO_PHOSPHATIDYLINOSITOL_METABOLIC_PROCESS	193	0.275324	1.34364	24	0.024	0.0707916	1
576	GO_REGULATION_OF_DENDRITE_MORPHOGENESIS	74	0.325142	1.34326	65	0.065	0.146516	1
5690	GO_PEPTIDASE_INHIBITOR_ACTIVITY	177	0.283984	1.34264	30	0.03	0.0833772	1
3675	GO_NEPHRON_TUBULE_FORMATION	18	0.442428	1.34236	115	0.115	0.223173	1
387	GO_NEGATIVE_REGULATION_OF_MUSCLE_CELL_DIFFERENTIATION	55	0.346952	1.34207	79	0.079	0.169057	1
4676	GO_CONTRACTILE_FIBER	211	0.276535	1.3419	17	0.017	0.0544607	1
5246	GO_CLATHRIN_BINDING	65	0.329396	1.34093	72	0.072	0.157962	1
5783	GO_PHOSPHOLIPID_BINDING	360	0.257387	1.3398	14	0.014	0.0478279	1
3206	GO_ASYMMETRIC_PROTEIN_LOCALIZATION	19	0.437136	1.33871	107	0.107	0.212314	1
74	GO_EXCRETION	44	0.351222	1.33858	82	0.082	0.17453	1
5879	GO_HISTONE_DEACETYLASE_ACTIVITY_H3_K14_SPECIFIC_	12	0.512544	1.33796	135	0.135	0.250484	1
3682	GO_REGULATION_OF_CARDIAC_CONDUCTION	66	0.333034	1.33773	74	0.074	0.161274	1
2214	GO_REGULATION_OF_PEPTIDASE_ACTIVITY	392	0.256092	1.33766	8	0.008	0.0319622	1
2311	GO_NEURON_PROJECTION_MORPHOGENESIS	402	0.257797	1.33738	6	0.006	0.0259707	1
4728	GO_CATION_CHANNEL_COMPLEX	167	0.28393	1.33711	25	0.025	0.0729054	1
5724	GO_DOPAMINE_BINDING	11	0.510565	1.33684	136	0.136	0.251787	1
16	GO_NEGATIVE_REGULATION_OF_EPITHELIAL_CELL_PROLIFERATION	115	0.302383	1.33595	43	0.043	0.108085	1
5490	GO_CALMODULIN_DEPENDENT_PROTEIN_KINASE_ACTIVITY	28	0.402846	1.33571	112	0.112	0.219511	1
3954	GO_RUFFLE_ORGANIZATION	21	0.430373	1.33543	128	0.128	0.241279	1
5591	GO_PROTEIN_KINASE_C_ACTIVITY	16	0.462825	1.33504	120	0.12	0.230308	1
707	GO_REGULATION_OF_MACROPHAGE_ACTIVATION	26	0.415002	1.33423	108	0.108	0.213439	1
3903	GO_LEUKOCYTE_MIGRATION_INVOLVED_IN_INFLAMMATORY_RESPONSE	11	0.509595	1.33417	136	0.136	0.251787	1
4036	GO_INORGANIC_ION_TRANSMEMBRANE_TRANSPORT	583	0.24629	1.33394	7	0.007	0.0289643	1
3791	GO_PRODUCTION_OF_MOLECULAR_MEDIATOR_OF_IMMUNE_RESPONSE	65	0.334797	1.33375	79	0.079	0.169057	1
1932	GO_ADRENERGIC_RECEPTOR_SIGNALING_PATHWAY	23	0.415504	1.33214	123	0.123	0.234092	1
2959	GO_CELLULAR_RESPONSE_TO_AMINO_ACID_STIMULUS	53	0.345302	1.33205	77	0.077	0.166099	1
936	GO_NEGATIVE_REGULATION_OF_BONE_REMODELING	13	0.494744	1.33201	121	0.121	0.231402	1
5401	GO_NAD_ADP_RIBOSYLTRANSFERASE_ACTIVITY	26	0.394751	1.33102	103	0.103	0.206734	1
1234	GO_POSITIVE_REGULATION_OF_MULTICELLULAR_ORGANISMAL_METABOLIC_PROCESS	23	0.41653	1.33044	110	0.11	0.216236	1
2831	GO_POSITIVE_REGULATION_OF_INTERFERON_GAMMA_BIOSYNTHETIC_PROCESS	12	0.496752	1.33	134	0.134	0.249254	1
5888	GO_TUMOR_NECROSIS_FACTOR_RECEPTOR_SUPERFAMILY_BINDING	47	0.354575	1.3296	92	0.092	0.189939	1
2631	GO_POSITIVE_REGULATION_OF_LIPID_CATABOLIC_PROCESS	25	0.413243	1.32949	120	0.12	0.230308	1
4656	GO_COSTAMERE	19	0.434459	1.32945	115	0.115	0.223173	1
4094	GO_TEMPERATURE_HOMEOSTASIS	26	0.409758	1.32942	113	0.113	0.22074	1
1165	GO_ORGANONITROGEN_COMPOUND_CATABOLIC_PROCESS	343	0.257566	1.32894	16	0.016	0.0523628	1
315	GO_REGULATION_OF_PODOSOME_ASSEMBLY	14	0.481322	1.32821	126	0.126	0.238192	1
1206	GO_MITOTIC_CELL_CYCLE_ARREST	13	0.483299	1.32735	140	0.14	0.257501	1
4135	GO_NEGATIVE_REGULATION_OF_SIGNAL_TRANSDUCTION_IN_ABSENCE_OF_LIGAND	32	0.385394	1.32734	114	0.114	0.221815	1
1601	GO_EPITHELIAL_CILIUM_MOVEMENT	18	0.448505	1.32676	119	0.119	0.229356	1
4139	GO_RESPONSE_TO_UV_B	16	0.45389	1.32672	130	0.13	0.243652	1
5265	GO_CATION_TRANSMEMBRANE_TRANSPORTER_ACTIVITY	622	0.241961	1.32578	5	0.005	0.0228809	1
5829	GO_PRE_MRNA_BINDING	24	0.417632	1.32543	118	0.118	0.227725	1
4242	GO_REGULATION_OF_ODONTOGENESIS_OF_DENTIN_CONTAINING_TOOTH	11	0.501877	1.32487	153	0.153	0.274917	1
4154	GO_POSITIVE_REGULATION_OF_CAMP_MEDIATED_SIGNALING	12	0.494757	1.32473	149	0.149	0.269613	1
5708	GO_INSULIN_RECEPTOR_SUBSTRATE_BINDING	11	0.502792	1.3247	151	0.151	0.272482	1
4962	GO_AXON_PART	219	0.271953	1.3247	39	0.039	0.10139	1
4629	GO_COMPACT_MYELIN	15	0.472225	1.3245	145	0.145	0.26407	1
912	GO_NEURON_PROJECTION_DEVELOPMENT	545	0.246026	1.3244	19	0.019	0.0592948	1
3379	GO_POSITIVE_REGULATION_OF_HUMORAL_IMMUNE_RESPONSE	16	0.463447	1.3244	126	0.126	0.238192	1
455	GO_SKELETAL_MUSCLE_ADAPTATION	11	0.512322	1.32416	149	0.149	0.269613	1
359	GO_RESPONSE_TO_IMMOBILIZATION_STRESS	22	0.416791	1.32405	119	0.119	0.229356	1
983	GO_REGULATION_OF_CELLULAR_COMPONENT_BIOGENESIS	767	0.240606	1.3237	33	0.033	0.0901898	1
3860	GO_PEPTIDE_CATABOLIC_PROCESS	25	0.407088	1.32349	123	0.123	0.234092	1
2357	GO_REGULATION_OF_SYNAPTIC_VESICLE_EXOCYTOSIS	21	0.42363	1.3233	124	0.124	0.235692	1
756	GO_REGULATION_OF_RUFFLE_ASSEMBLY	21	0.417886	1.32325	136	0.136	0.251787	1
4162	GO_RESPONSE_TO_PURINE_CONTAINING_COMPOUND	158	0.283868	1.32272	44	0.044	0.109851	1
1893	GO_POSITIVE_REGULATION_OF_CELL_JUNCTION_ASSEMBLY	24	0.409954	1.32246	115	0.115	0.223173	1
3813	GO_REGULATION_OF_AUTOPHAGOSOME_ASSEMBLY	34	0.376541	1.32242	106	0.106	0.210753	1
2826	GO_REGULATION_OF_FATTY_ACID_BIOSYNTHETIC_PROCESS	35	0.367158	1.3222	104	0.104	0.208176	1
1485	GO_SYNAPTIC_VESICLE_ENDOCYTOSIS	17	0.451707	1.3217	123	0.123	0.234092	1
2731	GO_CELLULAR_GLUCOSE_HOMEOSTASIS	75	0.31497	1.32129	70	0.07	0.154837	1
4294	GO_POSITIVE_REGULATION_OF_GLUCOSE_IMPORT_IN_RESPONSE_TO_INSULIN_STIMULUS	12	0.495947	1.32084	143	0.143	0.261152	1
5325	GO_TOXIC_SUBSTANCE_BINDING	12	0.489386	1.32049	146	0.146	0.265565	1
199	GO_REGULATION_OF_SKELETAL_MUSCLE_TISSUE_DEVELOPMENT	50	0.348042	1.32021	84	0.084	0.177764	1
2000	GO_CELLULAR_RESPONSE_TO_CAMP	50	0.343874	1.32003	87	0.087	0.182416	1
3830	GO_ACTIVATION_OF_TRANSMEMBRANE_RECEPTOR_PROTEIN_TYROSINE_KINASE_ACTIVITY	12	0.49268	1.31987	142	0.142	0.259726	1
734	GO_POSITIVE_REGULATION_OF_ACTIN_CYTOSKELETON_REORGANIZATION	16	0.45767	1.31979	130	0.13	0.243652	1
1037	GO_NEGATIVE_REGULATION_OF_SERINE_TYPE_PEPTIDASE_ACTIVITY	11	0.503242	1.31964	159	0.159	0.283033	1
3703	GO_REGULATION_OF_POTASSIUM_ION_TRANSMEMBRANE_TRANSPORTER_ACTIVITY	41	0.362887	1.31963	113	0.113	0.22074	1
1667	GO_CALCIUM_ION_IMPORT	65	0.324271	1.31799	71	0.071	0.156348	1
1054	GO_PHOSPHATIDYLINOSITOL_3_PHOSPHATE_BIOSYNTHETIC_PROCESS	49	0.345903	1.31793	84	0.084	0.177764	1
5095	GO_PHOSPHATIDYLINOSITOL_PHOSPHATE_PHOSPHATASE_ACTIVITY	29	0.381924	1.31783	114	0.114	0.221815	1
1585	GO_NEGATIVE_REGULATION_OF_POTASSIUM_ION_TRANSPORT	32	0.383726	1.31738	114	0.114	0.221815	1
4880	GO_CELL_BODY	494	0.244653	1.31731	9	0.009	0.0349429	1
2020	GO_REGULATION_OF_EXTRINSIC_APOPTOTIC_SIGNALING_PATHWAY_IN_ABSENCE_OF_LIGAND	46	0.356534	1.31656	93	0.093	0.191535	1
2207	GO_RESPONSE_TO_ESTROGEN	218	0.271886	1.31637	32	0.032	0.0877405	1
5210	GO_GTPASE_INHIBITOR_ACTIVITY	14	0.472319	1.3163	139	0.139	0.256379	1
5198	GO_REGULATORY_REGION_NUCLEIC_ACID_BINDING	818	0.237177	1.316	0	0	0	1
1248	GO_ORGANOPHOSPHATE_ESTER_TRANSPORT	89	0.309812	1.31581	60	0.06	0.137872	1
2659	GO_CELLULAR_RESPONSE_TO_INORGANIC_SUBSTANCE	156	0.281985	1.31436	41	0.041	0.104613	1
2055	GO_SKELETAL_MUSCLE_ORGAN_DEVELOPMENT	137	0.283344	1.3142	42	0.042	0.106384	1
1807	GO_REGULATION_OF_TRANSMEMBRANE_RECEPTOR_PROTEIN_SERINE_THREONINE_KINASE_SIGNALING_PATHWAY	207	0.269878	1.31372	35	0.035	0.0940059	1
3179	GO_SEMAPHORIN_PLEXIN_SIGNALING_PATHWAY_INVOLVED_IN_NEURON_PROJECTION_GUIDANCE	13	0.475674	1.31347	154	0.154	0.27663	1
76	GO_POSITIVE_REGULATION_OF_SYNAPTIC_TRANSMISSION_GLUTAMATERGIC	18	0.439726	1.31312	140	0.14	0.257501	1
3822	GO_NEGATIVE_REGULATION_OF_REACTIVE_OXYGEN_SPECIES_BIOSYNTHETIC_PROCESS	16	0.447101	1.31295	132	0.132	0.246386	1
2548	GO_PHOSPHATIDYLINOSITOL_DEPHOSPHORYLATION	23	0.419554	1.31233	141	0.141	0.258376	1
2904	GO_GLOMERULAR_EPITHELIUM_DEVELOPMENT	19	0.429686	1.31219	140	0.14	0.257501	1
308	GO_NEGATIVE_REGULATION_OF_INTRINSIC_APOPTOTIC_SIGNALING_PATHWAY_BY_P53_CLASS_MEDIATOR	18	0.44174	1.3121	141	0.141	0.258376	1
2932	GO_POSITIVE_REGULATION_OF_ADHERENS_JUNCTION_ORGANIZATION	21	0.422744	1.31176	136	0.136	0.251787	1
900	GO_PROTEIN_LIPID_COMPLEX_ASSEMBLY	21	0.424052	1.31147	131	0.131	0.245138	1
4594	GO_SODIUM_CHANNEL_COMPLEX	17	0.440913	1.31139	152	0.152	0.274035	1
2410	GO_POSITIVE_REGULATION_OF_POTASSIUM_ION_TRANSMEMBRANE_TRANSPORTER_ACTIVITY	16	0.453305	1.31096	147	0.147	0.266973	1
23	GO_NEUROMUSCULAR_JUNCTION_DEVELOPMENT	36	0.363548	1.31006	117	0.117	0.225943	1
5168	GO_PROTEIN_KINASE_A_BINDING	42	0.358828	1.31002	97	0.097	0.197437	1
3045	GO_REGULATION_OF_TYPE_I_INTERFERON_MEDIATED_SIGNALING_PATHWAY	39	0.359534	1.30951	116	0.116	0.224672	1
2528	GO_NEGATIVE_REGULATION_OF_MULTICELLULAR_ORGANISM_GROWTH	11	0.499827	1.30867	153	0.153	0.274917	1
5219	GO_LYSOPHOSPHOLIPASE_ACTIVITY	20	0.428599	1.30849	143	0.143	0.261152	1
3829	GO_MUSCLE_CELL_DIFFERENTIATION	237	0.263655	1.30816	29	0.029	0.0811314	1
5487	GO_TRANSFERASE_ACTIVITY_TRANSFERRING_AMINO_ACYL_GROUPS	26	0.401641	1.30809	124	0.124	0.235692	1
2914	GO_RESPONSE_TO_GROWTH_FACTOR	475	0.245392	1.30802	12	0.012	0.0428768	1
1918	GO_REGULATION_OF_CELL_GROWTH	391	0.25165	1.30623	16	0.016	0.0523628	1
5655	GO_PHOSPHOLIPASE_A2_ACTIVITY	31	0.383686	1.30614	121	0.121	0.231402	1
3839	GO_INACTIVATION_OF_MAPK_ACTIVITY	26	0.403709	1.30567	129	0.129	0.242546	1
5545	GO_CARBOXYLIC_ESTER_HYDROLASE_ACTIVITY	135	0.286138	1.30543	46	0.046	0.113504	1
4041	GO_AXONAL_FASCICULATION	20	0.425136	1.30431	145	0.145	0.26407	1
3105	GO_HOMOTYPIC_CELL_CELL_ADHESION	51	0.344557	1.30408	100	0.1	0.201808	1
3546	GO_REGULATION_OF_ENDOTHELIAL_CELL_CHEMOTAXIS	17	0.440263	1.30401	139	0.139	0.256379	1
1926	GO_LEARNING	131	0.287972	1.3039	46	0.046	0.113504	1
4371	GO_MYOBLAST_FUSION	20	0.42479	1.30379	141	0.141	0.258376	1
3433	GO_PYRIMIDINE_NUCLEOSIDE_CATABOLIC_PROCESS	21	0.423785	1.30363	125	0.125	0.236907	1
5588	GO_UBIQUITIN_LIKE_PROTEIN_CONJUGATING_ENZYME_BINDING	34	0.375951	1.30324	111	0.111	0.21784	1
3594	GO_REGULATION_OF_RESPONSE_TO_OXIDATIVE_STRESS	65	0.322387	1.30313	88	0.088	0.184057	1
5678	GO_NAD_DEPENDENT_PROTEIN_DEACETYLASE_ACTIVITY	17	0.445116	1.30285	142	0.142	0.259726	1
521	GO_NEGATIVE_REGULATION_OF_CELL_GROWTH	170	0.274686	1.30229	38	0.038	0.0998872	1
5523	GO_ENZYME_INHIBITOR_ACTIVITY	378	0.251523	1.30228	14	0.014	0.0478279	1
2796	GO_POSITIVE_REGULATION_OF_RESPONSE_TO_CYTOKINE_STIMULUS	33	0.365676	1.30215	120	0.12	0.230308	1
3269	GO_POSITIVE_REGULATION_OF_OSTEOBLAST_DIFFERENTIATION	60	0.328501	1.30205	94	0.094	0.192923	1
1277	GO_ENDOTHELIAL_CELL_MIGRATION	57	0.326074	1.302	102	0.102	0.205005	1
5209	GO_PHOSPHATIDYLINOSITOL_PHOSPHATE_BINDING	116	0.288735	1.30183	59	0.059	0.136422	1
5058	GO_G_PROTEIN_ALPHA_SUBUNIT_BINDING	22	0.419652	1.30172	142	0.142	0.259726	1
3326	GO_TUBE_MORPHOGENESIS	323	0.253064	1.30111	22	0.022	0.0664492	1
1696	GO_REGULATION_OF_NUCLEOCYTOPLASMIC_TRANSPORT	220	0.264815	1.30107	31	0.031	0.0855536	1
2158	GO_AMINOGLYCAN_METABOLIC_PROCESS	166	0.274795	1.3006	43	0.043	0.108085	1
38	GO_NEURON_DEVELOPMENT	687	0.237876	1.30016	25	0.025	0.0729054	1
742	GO_NEGATIVE_REGULATION_OF_ENDOCYTOSIS	39	0.353635	1.30008	114	0.114	0.221815	1
471	GO_RESPONSE_TO_DIETARY_EXCESS	21	0.414886	1.2999	140	0.14	0.257501	1
3571	GO_LOCALIZATION_WITHIN_MEMBRANE	122	0.292581	1.29967	68	0.068	0.151832	1
4600	GO_CORTICAL_CYTOSKELETON	81	0.309508	1.29945	85	0.085	0.179303	1
524	GO_PROTEIN_SECRETION	116	0.289196	1.29917	57	0.057	0.133097	1
5477	GO_LIPOPOLYSACCHARIDE_BINDING	21	0.414795	1.29898	149	0.149	0.269613	1
5890	GO_CORE_PROMOTER_SEQUENCE_SPECIFIC_DNA_BINDING	101	0.295799	1.29827	61	0.061	0.139466	1
996	GO_EPIDERMAL_GROWTH_FACTOR_RECEPTOR_SIGNALING_PATHWAY	55	0.332855	1.29813	85	0.085	0.179303	1
3491	GO_REGULATION_OF_SKELETAL_MUSCLE_CONTRACTION	11	0.501383	1.29803	167	0.167	0.293739	1
2650	GO_REGULATION_OF_PROTEIN_IMPORT	183	0.273926	1.29748	45	0.045	0.111595	1
5309	GO_PHOSPHATIDYLINOSITOL_BINDING	200	0.265788	1.29741	35	0.035	0.0940059	1
3462	GO_NEUTROPHIL_MEDIATED_IMMUNITY	22	0.409214	1.29713	133	0.133	0.247784	1
3246	GO_LIPID_CATABOLIC_PROCESS	247	0.259936	1.29712	39	0.039	0.10139	1
2265	GO_BICARBONATE_TRANSPORT	44	0.357923	1.29705	120	0.12	0.230308	1
450	GO_NEGATIVE_REGULATION_OF_BLOOD_VESSEL_ENDOTHELIAL_CELL_MIGRATION	24	0.394475	1.29675	124	0.124	0.235692	1
1997	GO_ORGAN_MORPHOGENESIS	841	0.233436	1.29588	5	0.005	0.0228809	1
3482	GO_REGULATION_OF_INTERLEUKIN_6_BIOSYNTHETIC_PROCESS	16	0.453402	1.29583	161	0.161	0.285734	1
4502	GO_INTRINSIC_COMPONENT_OF_ORGANELLE_MEMBRANE	281	0.257327	1.29544	29	0.029	0.0811314	1
1571	GO_PROTEIN_TRIMERIZATION	40	0.351605	1.29476	112	0.112	0.219511	1
2170	GO_PROTEIN_PHOSPHORYLATION	944	0.231973	1.29446	1	0.001	0.00688824	1
2231	GO_NEGATIVE_REGULATION_OF_MOLECULAR_FUNCTION	1079	0.22807	1.29432	2	0.002	0.0116821	1
1411	GO_POSITIVE_REGULATION_OF_BMP_SIGNALING_PATHWAY	32	0.373949	1.29403	125	0.125	0.236907	1
1618	GO_MUSCLE_STRUCTURE_DEVELOPMENT	432	0.243619	1.29395	12	0.012	0.0428768	1
4893	GO_ACTIN_BASED_CELL_PROJECTION	181	0.273336	1.29379	39	0.039	0.10139	1
163	GO_URETER_DEVELOPMENT	11	0.495363	1.29378	163	0.163	0.288332	1
3410	GO_REGULATION_OF_HEART_GROWTH	42	0.352798	1.29352	114	0.114	0.221815	1
5642	GO_SOLUTE_CATION_SYMPORTER_ACTIVITY	99	0.294933	1.29337	61	0.061	0.139466	1
3372	GO_REGULATION_OF_PROTEIN_LOCALIZATION_TO_NUCLEUS	218	0.265582	1.29337	27	0.027	0.0772529	1
3247	GO_REVERSE_CHOLESTEROL_TRANSPORT	17	0.431605	1.29332	149	0.149	0.269613	1
4903	GO_PRESYNAPSE	283	0.255363	1.29303	35	0.035	0.0940059	1
1197	GO_NEGATIVE_REGULATION_OF_DEVELOPMENTAL_GROWTH	84	0.302759	1.2926	76	0.076	0.164843	1
3035	GO_MUSCLE_HYPERTROPHY	28	0.385869	1.29255	138	0.138	0.254773	1
1561	GO_NEGATIVE_REGULATION_OF_DEFENSE_RESPONSE_TO_VIRUS	18	0.437788	1.29245	165	0.165	0.29126	1
811	GO_EXTRINSIC_APOPTOTIC_SIGNALING_PATHWAY	99	0.293978	1.29233	51	0.051	0.122173	1
1393	GO_BLOOD_COAGULATION_FIBRIN_CLOT_FORMATION	25	0.397695	1.29219	106	0.106	0.210753	1
4699	GO_MYOSIN_COMPLEX	67	0.319563	1.2919	104	0.104	0.208176	1
3514	GO_CEREBRAL_CORTEX_CELL_MIGRATION	43	0.348632	1.29169	110	0.11	0.216236	1
2824	GO_GDP_METABOLIC_PROCESS	13	0.471006	1.29142	163	0.163	0.288332	1
1203	GO_REPLACEMENT_OSSIFICATION	26	0.392491	1.2908	124	0.124	0.235692	1
5654	GO_GROWTH_FACTOR_RECEPTOR_BINDING	129	0.284737	1.29057	57	0.057	0.133097	1
3991	GO_TRANSMEMBRANE_TRANSPORT	1098	0.228665	1.28985	1	0.001	0.00688824	1
2763	GO_CELL_SUBSTRATE_ADHERENS_JUNCTION_ASSEMBLY	24	0.40114	1.28961	139	0.139	0.256379	1
650	GO_CELL_DEATH	1001	0.227864	1.28923	39	0.039	0.10139	1
678	GO_LYMPH_NODE_DEVELOPMENT	17	0.425743	1.28895	145	0.145	0.26407	1
2058	GO_NEGATIVE_REGULATION_OF_HOMEOSTATIC_PROCESS	124	0.286118	1.28829	70	0.07	0.154837	1
5311	GO_SH3_DOMAIN_BINDING	116	0.289907	1.28815	68	0.068	0.151832	1
2980	GO_ENDOCYTIC_RECYCLING	25	0.392898	1.28811	155	0.155	0.278004	1
3300	GO_INTRACELLULAR_LIPID_TRANSPORT	20	0.424183	1.28805	142	0.142	0.259726	1
5583	GO_TRANSMEMBRANE_TRANSPORTER_ACTIVITY	997	0.227361	1.28802	2	0.002	0.0116821	1
1160	GO_RESPONSE_TO_INORGANIC_SUBSTANCE	479	0.24332	1.28793	12	0.012	0.0428768	1
26	GO_SMAD_PROTEIN_SIGNAL_TRANSDUCTION	56	0.324606	1.28775	92	0.092	0.189939	1
5664	GO_ARF_GUANYL_NUCLEOTIDE_EXCHANGE_FACTOR_ACTIVITY	24	0.403464	1.28745	140	0.14	0.257501	1
5762	GO_ALPHA_ACTININ_BINDING	21	0.411286	1.28685	156	0.156	0.279121	1
3275	GO_HISTONE_H4_K16_ACETYLATION	19	0.416337	1.28641	145	0.145	0.26407	1
483	GO_PROTEIN_LOCALIZATION_TO_CILIUM	27	0.380493	1.28597	130	0.13	0.243652	1
45	GO_ANATOMICAL_STRUCTURE_FORMATION_INVOLVED_IN_MORPHOGENESIS	957	0.230679	1.28575	48	0.048	0.116975	1
3709	GO_RETINA_DEVELOPMENT_IN_CAMERA_TYPE_EYE	131	0.27942	1.28565	61	0.061	0.139466	1
3689	GO_POSITIVE_REGULATION_OF_MONOOXYGENASE_ACTIVITY	29	0.379544	1.28463	135	0.135	0.250484	1
2116	GO_BLOOD_COAGULATION_INTRINSIC_PATHWAY	18	0.426027	1.28411	173	0.173	0.301514	1
12	GO_NEGATIVE_REGULATION_OF_TRANSCRIPTION_FACTOR_IMPORT_INTO_NUCLEUS	39	0.34915	1.28404	126	0.126	0.238192	1
5064	GO_CYCLASE_ACTIVITY	22	0.415388	1.28355	157	0.157	0.280317	1
349	GO_SODIUM_ION_EXPORT	12	0.478624	1.28315	174	0.174	0.302722	1
223	GO_RESPONSE_TO_ORGANOPHOSPHORUS	139	0.278197	1.28306	48	0.048	0.116975	1
3264	GO_CATECHOLAMINE_TRANSPORT	14	0.457951	1.28267	168	0.168	0.295147	1
3718	GO_REGULATION_OF_STAT_CASCADE	144	0.279007	1.28266	59	0.059	0.136422	1
433	GO_REGULATION_OF_CELL_CELL_ADHESION_MEDIATED_BY_CADHERIN	11	0.510257	1.28251	174	0.174	0.302722	1
4960	GO_CILIUM	469	0.24091	1.28247	7	0.007	0.0289643	1
5040	GO_ACTIVE_ION_TRANSMEMBRANE_TRANSPORTER_ACTIVITY	171	0.271903	1.28211	59	0.059	0.136422	1
5755	GO_FATTY_ACID_LIGASE_ACTIVITY	16	0.436338	1.28197	171	0.171	0.299174	1
3250	GO_PROTEIN_LOCALIZATION_TO_SYNAPSE	16	0.439181	1.28185	170	0.17	0.297601	1
1436	GO_NEGATIVE_REGULATION_OF_PROTEIN_BINDING	79	0.30337	1.2817	78	0.078	0.167645	1
3324	GO_POSITIVE_REGULATION_OF_OSTEOBLAST_PROLIFERATION	11	0.490884	1.28104	170	0.17	0.297601	1
5496	GO_INORGANIC_CATION_TRANSMEMBRANE_TRANSPORTER_ACTIVITY	527	0.238156	1.28076	10	0.01	0.0375921	1
5386	GO_CATION_TRANSPORTING_ATPASE_ACTIVITY	59	0.327182	1.2799	105	0.105	0.20954	1
978	GO_POSITIVE_REGULATION_OF_HOMEOSTATIC_PROCESS	216	0.263107	1.27981	31	0.031	0.0855536	1
4464	GO_VOLTAGE_GATED_CALCIUM_CHANNEL_COMPLEX	40	0.350145	1.27939	138	0.138	0.254773	1
2571	GO_MONOCARBOXYLIC_ACID_BIOSYNTHETIC_PROCESS	172	0.270168	1.27931	43	0.043	0.108085	1
201	GO_NEGATIVE_REGULATION_OF_PROTEIN_AUTOPHOSPHORYLATION	11	0.493901	1.27895	178	0.178	0.307601	1
1245	GO_CERAMIDE_BIOSYNTHETIC_PROCESS	43	0.346611	1.2789	108	0.108	0.213439	1
1611	GO_CELLULAR_COMPONENT_ASSEMBLY_INVOLVED_IN_MORPHOGENESIS	246	0.259709	1.27883	40	0.04	0.103084	1
764	GO_POSITIVE_REGULATION_OF_LYASE_ACTIVITY	61	0.322039	1.27873	109	0.109	0.214841	1
4370	GO_NEGATIVE_REGULATION_OF_PEPTIDASE_ACTIVITY	245	0.259148	1.27845	41	0.041	0.104613	1
3176	GO_REGULATION_OF_GLUTAMATE_SECRETION	15	0.461439	1.27821	156	0.156	0.279121	1
2403	GO_RESPONSE_TO_ATP	30	0.369826	1.27814	144	0.144	0.262816	1
2552	GO_NEGATIVE_REGULATION_OF_CATALYTIC_ACTIVITY	829	0.228433	1.27753	7	0.007	0.0289643	1
2407	GO_LONG_TERM_MEMORY	28	0.383572	1.27749	132	0.132	0.246386	1
309	GO_RIBONUCLEOTIDE_CATABOLIC_PROCESS	28	0.377383	1.27729	156	0.156	0.279121	1
1642	GO_SUBSTRATE_INDEPENDENT_TELENCEPHALIC_TANGENTIAL_MIGRATION	13	0.463593	1.27728	189	0.189	0.320158	1
3713	GO_POSITIVE_REGULATION_OF_ENDOTHELIAL_CELL_PROLIFERATION	68	0.316749	1.27708	99	0.099	0.200268	1
5825	GO_CORE_PROMOTER_PROXIMAL_REGION_DNA_BINDING	371	0.245791	1.27683	25	0.025	0.0729054	1
1863	GO_RESPONSE_TO_CAMP	104	0.291702	1.27668	77	0.077	0.166099	1
1820	GO_CYCLIC_NUCLEOTIDE_MEDIATED_SIGNALING	46	0.333663	1.27603	114	0.114	0.221815	1
5536	GO_INOSITOL_PHOSPHATE_PHOSPHATASE_ACTIVITY	20	0.409924	1.27546	163	0.163	0.288332	1
1177	GO_FOREBRAIN_GENERATION_OF_NEURONS	66	0.318277	1.27543	95	0.095	0.194302	1
5101	GO_DIVALENT_INORGANIC_CATION_TRANSMEMBRANE_TRANSPORTER_ACTIVITY	167	0.26675	1.2754	52	0.052	0.123667	1
1038	GO_PROTEIN_LOCALIZATION_TO_CELL_PERIPHERY	151	0.27344	1.27535	62	0.062	0.140935	1
2189	GO_LIVER_REGENERATION	19	0.42128	1.27491	168	0.168	0.295147	1
2180	GO_MESONEPHRIC_TUBULE_MORPHOGENESIS	53	0.33306	1.27451	115	0.115	0.223173	1
5387	GO_ATPASE_COUPLED_ION_TRANSMEMBRANE_TRANSPORTER_ACTIVITY	71	0.316147	1.27431	104	0.104	0.208176	1
558	GO_REGULATION_OF_RECEPTOR_ACTIVITY	117	0.283053	1.27412	67	0.067	0.150053	1
3886	GO_REGULATION_OF_MUSCLE_ADAPTATION	63	0.320103	1.27367	115	0.115	0.223173	1
577	GO_CELLULAR_RESPONSE_TO_LITHIUM_ION	17	0.436511	1.27352	170	0.17	0.297601	1
3437	GO_REGULATION_OF_TYROSINE_PHOSPHORYLATION_OF_STAT3_PROTEIN	44	0.343866	1.27326	130	0.13	0.243652	1
319	GO_RESPONSE_TO_AMINE	48	0.32994	1.27192	121	0.121	0.231402	1
1970	GO_MUSCLE_ADAPTATION	29	0.383263	1.2714	148	0.148	0.268625	1
322	GO_NEGATIVE_REGULATION_OF_POTASSIUM_ION_TRANSMEMBRANE_TRANSPORTER_ACTIVITY	16	0.436982	1.2712	173	0.173	0.301514	1
5315	GO_CATION_SUGAR_SYMPORTER_ACTIVITY	15	0.447578	1.27107	162	0.162	0.287078	1
1814	GO_ENDOCRINE_PANCREAS_DEVELOPMENT	40	0.348546	1.27073	133	0.133	0.247784	1
5417	GO_CYSTEINE_TYPE_ENDOPEPTIDASE_ACTIVITY	86	0.295846	1.27071	83	0.083	0.176215	1
3741	GO_PURINE_CONTAINING_COMPOUND_CATABOLIC_PROCESS	50	0.334311	1.27001	141	0.141	0.258376	1
293	GO_REGULATION_OF_CARDIAC_MUSCLE_TISSUE_DEVELOPMENT	48	0.34199	1.26982	115	0.115	0.223173	1
4424	GO_DETECTION_OF_CALCIUM_ION	14	0.470336	1.26963	183	0.183	0.313132	1
3660	GO_LIPID_LOCALIZATION	264	0.253305	1.2693	46	0.046	0.113504	1
1981	GO_REPRODUCTIVE_BEHAVIOR	30	0.36756	1.26918	138	0.138	0.254773	1
1064	GO_SPECIFICATION_OF_ORGAN_IDENTITY	14	0.463369	1.26878	189	0.189	0.320158	1
3679	GO_LYMPH_VESSEL_DEVELOPMENT	20	0.417939	1.26877	156	0.156	0.279121	1
1083	GO_INNER_EAR_RECEPTOR_STEREOCILIUM_ORGANIZATION	21	0.404042	1.26841	176	0.176	0.305215	1
2426	GO_CELL_MORPHOGENESIS_INVOLVED_IN_DIFFERENTIATION	513	0.238843	1.2681	10	0.01	0.0375921	1
3843	GO_POSITIVE_REGULATION_OF_TRANSMEMBRANE_RECEPTOR_PROTEIN_SERINE_THREONINE_KINASE_SIGNALING_PATHWAY	100	0.288963	1.26808	83	0.083	0.176215	1
658	GO_REGULATION_OF_TOLL_LIKE_RECEPTOR_4_SIGNALING_PATHWAY	18	0.428455	1.26794	175	0.175	0.303926	1
1867	GO_NEGATIVE_REGULATION_OF_HEMOPOIESIS	128	0.280378	1.26753	79	0.079	0.169057	1
4374	GO_INOSITOL_LIPID_MEDIATED_SIGNALING	124	0.280924	1.26673	89	0.089	0.185558	1
5281	GO_AMIDE_TRANSMEMBRANE_TRANSPORTER_ACTIVITY	19	0.422556	1.26656	161	0.161	0.285734	1
1921	GO_PROTEIN_CARBOXYLATION	11	0.489905	1.26643	184	0.184	0.314389	1
5061	GO_CYTOSKELETAL_PROTEIN_BINDING	819	0.226201	1.26635	4	0.004	0.0193682	1
2341	GO_REGULATION_OF_INOSITOL_PHOSPHATE_BIOSYNTHETIC_PROCESS	14	0.462608	1.26568	181	0.181	0.310608	1
2551	GO_ANTIGEN_PROCESSING_AND_PRESENTATION_OF_EXOGENOUS_PEPTIDE_ANTIGEN_VIA_MHC_CLASS_I	66	0.314594	1.26535	116	0.116	0.224672	1
3742	GO_REGULATION_OF_LIPOPROTEIN_PARTICLE_CLEARANCE	14	0.451926	1.26502	171	0.171	0.299174	1
2419	GO_REGULATION_OF_SENSORY_PERCEPTION	36	0.358545	1.26462	150	0.15	0.271256	1
2735	GO_CYCLIC_NUCLEOTIDE_BIOSYNTHETIC_PROCESS	34	0.364752	1.26452	150	0.15	0.271256	1
4248	GO_FILOPODIUM_ASSEMBLY	17	0.438497	1.26375	175	0.175	0.303926	1
1150	GO_AMMONIUM_TRANSMEMBRANE_TRANSPORT	24	0.394716	1.26319	155	0.155	0.278004	1
2144	GO_NEGATIVE_REGULATION_OF_NUCLEOCYTOPLASMIC_TRANSPORT	71	0.310179	1.26318	113	0.113	0.22074	1
2200	GO_REGULATION_OF_CAMP_MEDIATED_SIGNALING	23	0.4001	1.26317	184	0.184	0.314389	1
1510	GO_REGULATION_OF_BIOMINERAL_TISSUE_DEVELOPMENT	75	0.310235	1.26227	99	0.099	0.200268	1
5268	GO_PHOSPHOLIPASE_BINDING	19	0.412844	1.26193	167	0.167	0.293739	1
3812	GO_REACTIVE_OXYGEN_SPECIES_METABOLIC_PROCESS	96	0.291414	1.26125	99	0.099	0.200268	1
5346	GO_PHOSPHORIC_ESTER_HYDROLASE_ACTIVITY	368	0.240726	1.26088	39	0.039	0.10139	1
1594	GO_NEGATIVE_REGULATION_OF_BLOOD_CIRCULATION	36	0.346163	1.26083	153	0.153	0.274917	1
4734	GO_CELL_CELL_ADHERENS_JUNCTION	54	0.325714	1.26077	106	0.106	0.210753	1
2675	GO_EPITHELIAL_CELL_APOPTOTIC_PROCESS	25	0.385133	1.26048	160	0.16	0.284471	1
1041	GO_REGULATION_OF_MUSCLE_TISSUE_DEVELOPMENT	103	0.292075	1.2604	87	0.087	0.182416	1
2496	GO_METANEPHRIC_NEPHRON_DEVELOPMENT	32	0.359793	1.26032	155	0.155	0.278004	1
2160	GO_REGULATION_OF_FEVER_GENERATION	11	0.486729	1.25989	187	0.187	0.317862	1
636	GO_REGULATION_OF_SERINE_TYPE_PEPTIDASE_ACTIVITY	13	0.458561	1.25985	203	0.203	0.33674	1
343	GO_NEUROTRANSMITTER_UPTAKE	15	0.43916	1.2596	181	0.181	0.310608	1
1520	GO_AMINE_METABOLIC_PROCESS	131	0.277895	1.25879	71	0.071	0.156348	1
4637	GO_ENDOPLASMIC_RETICULUM_PART	1163	0.220326	1.25856	6	0.006	0.0259707	1
2048	GO_TOXIN_METABOLIC_PROCESS	12	0.47822	1.25843	187	0.187	0.317862	1
1592	GO_REGULATION_OF_GLIAL_CELL_PROLIFERATION	21	0.41413	1.25822	176	0.176	0.305215	1
4857	GO_AXOLEMMA	14	0.451214	1.25805	172	0.172	0.300302	1
2823	GO_CELLULAR_LIPID_METABOLIC_PROCESS	913	0.226632	1.25802	2	0.002	0.0116821	1
5093	GO_SYNTAXIN_BINDING	93	0.295077	1.25749	91	0.091	0.188532	1
3451	GO_RESPONSE_TO_TRANSITION_METAL_NANOPARTICLE	148	0.27012	1.25662	71	0.071	0.156348	1
1957	GO_ANTIGEN_PROCESSING_AND_PRESENTATION_OF_PEPTIDE_ANTIGEN_VIA_MHC_CLASS_I	91	0.298655	1.25649	107	0.107	0.212314	1
3382	GO_STEM_CELL_DIFFERENTIATION	190	0.262355	1.25619	66	0.066	0.148318	1
863	GO_CLATHRIN_COAT_ASSEMBLY	12	0.464322	1.25596	193	0.193	0.325073	1
4440	GO_I_BAND	121	0.280747	1.25591	83	0.083	0.176215	1
3525	GO_RESPONSE_TO_ACIDIC_PH	21	0.404096	1.25565	178	0.178	0.307601	1
4969	GO_COATED_MEMBRANE	87	0.294786	1.25561	86	0.086	0.181025	1
891	GO_REGULATION_OF_MEMBRANE_DEPOLARIZATION	41	0.340957	1.25534	143	0.143	0.261152	1
5810	GO_HIGH_VOLTAGE_GATED_CALCIUM_CHANNEL_ACTIVITY	11	0.480103	1.25431	195	0.195	0.327509	1
2529	GO_NEGATIVE_REGULATION_OF_LYMPHOCYTE_APOPTOTIC_PROCESS	27	0.375107	1.25405	157	0.157	0.280317	1
3651	GO_REGULATION_OF_PRI_MIRNA_TRANSCRIPTION_FROM_RNA_POLYMERASE_II_PROMOTER	17	0.420873	1.25388	179	0.179	0.308608	1
3624	GO_PYRIMIDINE_NUCLEOSIDE_METABOLIC_PROCESS	51	0.330278	1.25387	131	0.131	0.245138	1
1027	GO_ENDOCARDIAL_CUSHION_MORPHOGENESIS	22	0.399318	1.25387	175	0.175	0.303926	1
244	GO_POSITIVE_REGULATION_OF_ERYTHROCYTE_DIFFERENTIATION	23	0.390982	1.25246	149	0.149	0.269613	1
1214	GO_SYNAPTIC_VESICLE_CYCLE	90	0.290989	1.25156	99	0.099	0.200268	1
3249	GO_REGULATION_OF_CHOLESTEROL_STORAGE	13	0.463454	1.25143	197	0.197	0.329838	1
1316	GO_EMBRYONIC_DIGESTIVE_TRACT_MORPHOGENESIS	17	0.422736	1.25104	172	0.172	0.300302	1
3526	GO_REGULATION_OF_RENAL_SYSTEM_PROCESS	38	0.352954	1.25039	147	0.147	0.266973	1
2734	GO_REGULATION_OF_VASCULAR_ENDOTHELIAL_GROWTH_FACTOR_PRODUCTION	31	0.368043	1.24911	157	0.157	0.280317	1
86	GO_CYTOKINE_METABOLIC_PROCESS	17	0.426259	1.24898	177	0.177	0.306231	1
878	GO_RESPONSE_TO_AXON_INJURY	48	0.330014	1.24882	130	0.13	0.243652	1
1973	GO_PHOSPHOLIPASE_C_ACTIVATING_G_PROTEIN_COUPLED_RECEPTOR_SIGNALING_PATHWAY	83	0.29766	1.2485	108	0.108	0.213439	1
1254	GO_PIGMENTATION	86	0.296245	1.24849	107	0.107	0.212314	1
2196	GO_ETHANOLAMINE_CONTAINING_COMPOUND_METABOLIC_PROCESS	85	0.290081	1.24828	107	0.107	0.212314	1
1101	GO_POSITIVE_REGULATION_OF_NUCLEOSIDE_METABOLIC_PROCESS	24	0.385739	1.24813	173	0.173	0.301514	1
3128	GO_SLEEP	14	0.449125	1.24759	195	0.195	0.327509	1
272	GO_POSITIVE_REGULATION_OF_ENDOTHELIAL_CELL_DIFFERENTIATION	15	0.437284	1.24739	172	0.172	0.300302	1
1909	GO_RESPONSE_TO_HORMONE	893	0.223093	1.2472	8	0.008	0.0319622	1
3569	GO_REGULATION_OF_LIPID_CATABOLIC_PROCESS	52	0.330146	1.24681	132	0.132	0.246386	1
611	GO_ENDOSOME_TO_LYSOSOME_TRANSPORT	42	0.33824	1.24677	146	0.146	0.265565	1
3836	GO_MATING_BEHAVIOR	23	0.399242	1.24648	189	0.189	0.320158	1
2224	GO_NEGATIVE_REGULATION_OF_CARTILAGE_DEVELOPMENT	26	0.381866	1.2464	178	0.178	0.307601	1
3140	GO_NEGATIVE_REGULATION_OF_STRESS_FIBER_ASSEMBLY	16	0.427072	1.24574	181	0.181	0.310608	1
2385	GO_MAINTENANCE_OF_CELL_POLARITY	12	0.473772	1.24508	199	0.199	0.332153	1
2229	GO_VASODILATION	26	0.377286	1.245	165	0.165	0.29126	1
5788	GO_GTP_DEPENDENT_PROTEIN_BINDING	17	0.425419	1.24468	199	0.199	0.332153	1
4630	GO_MOTILE_CILIUM	109	0.280622	1.24465	100	0.1	0.201808	1
2667	GO_LEUKOCYTE_ADHESION_TO_VASCULAR_ENDOTHELIAL_CELL	13	0.452411	1.24438	196	0.196	0.328536	1
143	GO_CELL_MIGRATION_INVOLVED_IN_HEART_DEVELOPMENT	14	0.444181	1.24436	185	0.185	0.315551	1
4644	GO_PARANODE_REGION_OF_AXON	12	0.467501	1.24392	205	0.205	0.339297	1
3758	GO_PATTERN_SPECIFICATION_PROCESS	418	0.235335	1.24372	30	0.03	0.0833772	1
2672	GO_RESPONSE_TO_FATTY_ACID	83	0.295772	1.24303	110	0.11	0.216236	1
3217	GO_AUTONOMIC_NERVOUS_SYSTEM_DEVELOPMENT	42	0.334883	1.24276	137	0.137	0.253242	1
5793	GO_LAMININ_BINDING	30	0.366245	1.2426	159	0.159	0.283033	1
3077	GO_REGULATION_OF_PEPTIDYL_THREONINE_PHOSPHORYLATION	37	0.345534	1.24242	169	0.169	0.296552	1
3194	GO_NEGATIVE_REGULATION_OF_ANTIGEN_RECEPTOR_MEDIATED_SIGNALING_PATHWAY	20	0.402086	1.2423	173	0.173	0.301514	1
1388	GO_REGULATION_OF_IMMUNOGLOBULIN_PRODUCTION	47	0.322972	1.24216	142	0.142	0.259726	1
2564	GO_NEGATIVE_REGULATION_OF_CYSTEINE_TYPE_ENDOPEPTIDASE_ACTIVITY	88	0.290153	1.24193	102	0.102	0.205005	1
1343	GO_PYRIMIDINE_RIBONUCLEOSIDE_CATABOLIC_PROCESS	11	0.471344	1.24161	204	0.204	0.33802	1
2495	GO_REGULATION_OF_ERYTHROCYTE_DIFFERENTIATION	36	0.350046	1.2411	141	0.141	0.258376	1
2304	GO_REGULATION_OF_LIPID_TRANSPORT	95	0.283408	1.241	109	0.109	0.214841	1
5196	GO_PROTEIN_PHOSPHORYLATED_AMINO_ACID_BINDING	24	0.383094	1.24073	178	0.178	0.307601	1
4115	GO_BEHAVIOR	516	0.230636	1.2407	17	0.017	0.0544607	1
1410	GO_POSITIVE_REGULATION_OF_PROTEIN_LOCALIZATION_TO_NUCLEUS	129	0.2684	1.24044	98	0.098	0.198925	1
4718	GO_INTRINSIC_COMPONENT_OF_GOLGI_MEMBRANE	57	0.317524	1.2402	143	0.143	0.261152	1
2345	GO_REGULATION_OF_PROTEIN_COMPLEX_ASSEMBLY	375	0.23595	1.24001	23	0.023	0.0686981	1
1238	GO_POSITIVE_REGULATION_OF_INTRACELLULAR_TRANSPORT	370	0.238572	1.24	38	0.038	0.0998872	1
2586	GO_FATTY_ACID_METABOLIC_PROCESS	296	0.243599	1.2399	48	0.048	0.116975	1
59	GO_SYNAPTIC_VESICLE_LOCALIZATION	106	0.281266	1.23947	92	0.092	0.189939	1
1283	GO_NEGATIVE_REGULATION_OF_FIBROBLAST_GROWTH_FACTOR_RECEPTOR_SIGNALING_PATHWAY	11	0.47633	1.23909	218	0.218	0.353981	1
1458	GO_NEGATIVE_REGULATION_OF_CELLULAR_RESPONSE_TO_GROWTH_FACTOR_STIMULUS	121	0.274128	1.23779	98	0.098	0.198925	1
874	GO_RESPONSE_TO_COPPER_ION	28	0.361893	1.23746	180	0.18	0.3097	1
1143	GO_REGULATION_OF_MEMBRANE_POTENTIAL	343	0.240974	1.23716	47	0.047	0.115298	1
3736	GO_REGULATION_OF_SPROUTING_ANGIOGENESIS	28	0.369562	1.237	159	0.159	0.283033	1
4428	GO_NEGATIVE_REGULATION_OF_INTERLEUKIN_2_PRODUCTION	16	0.428159	1.23694	202	0.202	0.335551	1
895	GO_REGULATION_OF_CARDIAC_MUSCLE_CELL_DIFFERENTIATION	19	0.423172	1.23668	198	0.198	0.330951	1
2098	GO_REGULATION_OF_LYMPHOCYTE_CHEMOTAXIS	20	0.40145	1.23658	183	0.183	0.313132	1
3799	GO_CAMERA_TYPE_EYE_MORPHOGENESIS	101	0.285053	1.23625	106	0.106	0.210753	1
3038	GO_REGULATION_OF_PHOSPHOLIPID_BIOSYNTHETIC_PROCESS	13	0.452419	1.23594	200	0.2	0.333446	1
1279	GO_GLYCEROLIPID_METABOLIC_PROCESS	356	0.238171	1.23543	43	0.043	0.108085	1
2893	GO_RESPONSE_TO_DRUG	431	0.233891	1.23502	35	0.035	0.0940059	1
5108	GO_TRANSMITTER_GATED_CHANNEL_ACTIVITY	26	0.372884	1.23491	181	0.181	0.310608	1
469	GO_ENDOCARDIAL_CUSHION_DEVELOPMENT	32	0.357923	1.23472	164	0.164	0.289755	1
2505	GO_APOPTOTIC_PROCESS_INVOLVED_IN_DEVELOPMENT	21	0.397826	1.23413	187	0.187	0.317862	1
360	GO_RESPONSE_TO_INTERLEUKIN_4	31	0.358728	1.2339	183	0.183	0.313132	1
647	GO_RESPONSE_TO_PHENYLPROPANOID	12	0.460368	1.23389	211	0.211	0.345363	1
140	GO_EPITHELIUM_DEVELOPMENT	945	0.221161	1.23379	54	0.054	0.127654	1
523	GO_CGMP_BIOSYNTHETIC_PROCESS	15	0.433401	1.23345	194	0.194	0.3262	1
5237	GO_INSULIN_RECEPTOR_BINDING	32	0.356235	1.23343	167	0.167	0.293739	1
1915	GO_EMBRYONIC_PATTERN_SPECIFICATION	58	0.309241	1.23324	144	0.144	0.262816	1
3337	GO_NEGATIVE_REGULATION_OF_PROTEIN_METABOLIC_PROCESS	1087	0.217602	1.23324	7	0.007	0.0289643	1
4431	GO_RESPONSE_TO_NITRIC_OXIDE	21	0.398628	1.23305	198	0.198	0.330951	1
3048	GO_MYOTUBE_DIFFERENTIATION	57	0.308466	1.23281	133	0.133	0.247784	1
5377	GO_PROTEIN_COMPLEX_BINDING	935	0.219696	1.23212	10	0.01	0.0375921	1
1895	GO_HEART_MORPHOGENESIS	212	0.2527	1.23171	69	0.069	0.153428	1
3142	GO_POSITIVE_REGULATION_OF_PROTEIN_IMPORT	104	0.281881	1.23154	116	0.116	0.224672	1
2833	GO_ADENYLATE_CYCLASE_MODULATING_G_PROTEIN_COUPLED_RECEPTOR_SIGNALING_PATHWAY	145	0.267994	1.23148	88	0.088	0.184057	1
5531	GO_SUPEROXIDE_GENERATING_NADPH_OXIDASE_ACTIVITY	11	0.468018	1.23121	208	0.208	0.342442	1
1325	GO_REGULATION_OF_VACUOLAR_TRANSPORT	29	0.365646	1.23079	180	0.18	0.3097	1
5329	GO_SNAP_RECEPTOR_ACTIVITY	38	0.344279	1.23075	153	0.153	0.274917	1
3941	GO_REGULATION_OF_RESPONSE_TO_TUMOR_CELL	13	0.46013	1.23071	231	0.231	0.367921	1
4597	GO_M_BAND	21	0.393123	1.23053	179	0.179	0.308608	1
4642	GO_BLOOD_MICROPARTICLE	143	0.270472	1.22949	98	0.098	0.198925	1
989	GO_REGULATION_OF_CARDIAC_MUSCLE_CELL_PROLIFERATION	29	0.369105	1.22881	179	0.179	0.308608	1
3310	GO_REGULATION_OF_INTRINSIC_APOPTOTIC_SIGNALING_PATHWAY_BY_P53_CLASS_MEDIATOR	22	0.386293	1.22854	180	0.18	0.3097	1
2220	GO_POSITIVE_REGULATION_OF_TRANSFERASE_ACTIVITY	616	0.225573	1.22768	13	0.013	0.0454079	1
4167	GO_NEURAL_TUBE_PATTERNING	34	0.347701	1.22725	181	0.181	0.310608	1
2759	GO_RESPONSE_TO_LIPOPROTEIN_PARTICLE	20	0.400445	1.22703	213	0.213	0.347867	1
5215	GO_EXTRACELLULAR_MATRIX_STRUCTURAL_CONSTITUENT	76	0.290639	1.22703	131	0.131	0.245138	1
2539	GO_INDOLE_CONTAINING_COMPOUND_METABOLIC_PROCESS	26	0.375817	1.22626	187	0.187	0.317862	1
2634	GO_POSITIVE_REGULATION_OF_TYROSINE_PHOSPHORYLATION_OF_STAT3_PROTEIN	37	0.342175	1.2261	184	0.184	0.314389	1
3910	GO_RESPONSE_TO_TUMOR_NECROSIS_FACTOR	233	0.248899	1.22558	70	0.07	0.154837	1
1308	GO_REGULATION_OF_EPITHELIAL_CELL_PROLIFERATION	285	0.241451	1.22538	70	0.07	0.154837	1
759	GO_VACUOLAR_TRANSPORT	253	0.247368	1.22512	50	0.05	0.120706	1
5431	GO_ALPHA_TUBULIN_BINDING	26	0.371229	1.22443	179	0.179	0.308608	1
2694	GO_ACTION_POTENTIAL	94	0.283159	1.22436	135	0.135	0.250484	1
1892	GO_NEGATIVE_REGULATION_OF_ACTIN_FILAMENT_BUNDLE_ASSEMBLY	19	0.409738	1.22385	196	0.196	0.328536	1
3650	GO_REGULATION_OF_EXTRACELLULAR_MATRIX_DISASSEMBLY	14	0.433289	1.22361	215	0.215	0.350359	1
3790	GO_CELL_DEVELOPMENT	1426	0.212826	1.22355	6	0.006	0.0259707	1
5044	GO_SERINE_TYPE_EXOPEPTIDASE_ACTIVITY	18	0.407114	1.2233	208	0.208	0.342442	1
3400	GO_NEURON_DIFFERENTIATION	874	0.220068	1.22295	13	0.013	0.0454079	1
2867	GO_NEGATIVE_REGULATION_OF_CATECHOLAMINE_SECRETION	16	0.415621	1.2225	198	0.198	0.330951	1
3755	GO_NEGATIVE_REGULATION_OF_CALCIUM_MEDIATED_SIGNALING	19	0.401937	1.22234	202	0.202	0.335551	1
237	GO_SINGLE_ORGANISM_BEHAVIOR	384	0.235489	1.22228	35	0.035	0.0940059	1
392	GO_EPITHELIAL_CELL_DEVELOPMENT	186	0.253028	1.22215	64	0.064	0.144814	1
5644	GO_PHOSPHOLIPID_TRANSPORTER_ACTIVITY	48	0.321853	1.22179	163	0.163	0.288332	1
4904	GO_A_BAND	34	0.345195	1.22155	170	0.17	0.297601	1
2671	GO_VENTRICULAR_CARDIAC_MUSCLE_CELL_ACTION_POTENTIAL	15	0.429937	1.22138	208	0.208	0.342442	1
1422	GO_SENSORY_PERCEPTION_OF_PAIN	75	0.293706	1.22131	140	0.14	0.257501	1
1797	GO_CELLULAR_RESPONSE_TO_HYDROGEN_PEROXIDE	61	0.303315	1.22101	153	0.153	0.274917	1
5482	GO_FILAMIN_BINDING	14	0.443663	1.22043	219	0.219	0.354728	1
4514	GO_CYTOPLASMIC_REGION	287	0.23955	1.2203	55	0.055	0.129398	1
5170	GO_KINASE_BINDING	606	0.224092	1.22026	31	0.031	0.0855536	1
817	GO_REGULATION_OF_TRANSFERASE_ACTIVITY	946	0.21795	1.21993	43	0.043	0.108085	1
52	GO_NEGATIVE_REGULATION_OF_PROTEIN_COMPLEX_ASSEMBLY	107	0.274931	1.21983	103	0.103	0.206734	1
3967	GO_REGULATION_OF_CELL_DEVELOPMENT	836	0.218833	1.21949	18	0.018	0.0568942	1
3040	GO_NEGATIVE_REGULATION_OF_DEVELOPMENTAL_PROCESS	801	0.2206	1.21911	19	0.019	0.0592948	1
4525	GO_PERINUCLEAR_REGION_OF_CYTOPLASM	642	0.221955	1.219	26	0.026	0.0748623	1
4202	GO_NEGATIVE_REGULATION_OF_CYTOSOLIC_CALCIUM_ION_CONCENTRATION	11	0.4715	1.21891	218	0.218	0.353981	1
1711	GO_REGULATION_OF_MUSCLE_CELL_APOPTOTIC_PROCESS	43	0.326995	1.21877	158	0.158	0.281762	1
5546	GO_CARBON_SULFUR_LYASE_ACTIVITY	11	0.472458	1.21871	230	0.23	0.366526	1
1010	GO_PURINE_RIBONUCLEOSIDE_BISPHOSPHATE_METABOLIC_PROCESS	20	0.39704	1.21857	216	0.216	0.351602	1
384	GO_MEMBRANE_BIOGENESIS	30	0.358719	1.21855	167	0.167	0.293739	1
1373	GO_NEGATIVE_REGULATION_OF_AXON_GUIDANCE	27	0.367043	1.21852	182	0.182	0.311962	1
176	GO_RESPONSE_TO_AMMONIUM_ION	51	0.31571	1.21797	152	0.152	0.274035	1
3388	GO_DIVALENT_INORGANIC_ANION_HOMEOSTASIS	13	0.455175	1.2179	221	0.221	0.356991	1
3557	GO_RESPONSE_TO_FUNGUS	52	0.318026	1.21785	149	0.149	0.269613	1
3904	GO_OSTEOCLAST_DIFFERENTIATION	30	0.360223	1.21785	186	0.186	0.316891	1
2649	GO_REGULATION_OF_HISTONE_PHOSPHORYLATION	13	0.446057	1.21716	219	0.219	0.354728	1
5481	GO_ION_CHANNEL_BINDING	111	0.274041	1.21715	109	0.109	0.214841	1
2086	GO_RESPONSE_TO_ORGANIC_CYCLIC_COMPOUND	917	0.21832	1.21714	15	0.015	0.0501441	1
206	GO_CARDIAC_SEPTUM_DEVELOPMENT	85	0.287126	1.21686	106	0.106	0.210753	1
3222	GO_RESPONSE_TO_THYROID_HORMONE	22	0.386456	1.21626	211	0.211	0.345363	1
1803	GO_EMBRYONIC_DIGESTIVE_TRACT_DEVELOPMENT	33	0.353877	1.21619	185	0.185	0.315551	1
290	GO_CARTILAGE_DEVELOPMENT	147	0.264262	1.21587	94	0.094	0.192923	1
5675	GO_SNARE_BINDING	128	0.267258	1.21583	99	0.099	0.200268	1
3359	GO_POSITIVE_REGULATION_OF_BLOOD_CIRCULATION	93	0.283548	1.21579	135	0.135	0.250484	1
786	GO_REGULATION_OF_VOLTAGE_GATED_CALCIUM_CHANNEL_ACTIVITY	25	0.372462	1.2156	207	0.207	0.341651	1
[truncated: 3,918 more rows]
