# Supplementary material for: Sex-based dimorphism of anticancer immune response and molecular mechanisms of immune evasion
Source: Clin Cancer Res. Author manuscript; Available in PMC 2021 Aug 4. (PMC7611463; doi:10.1158/1078-0432.CCR-21-0136)
Supplement: supplementary table 3 [file EMS127617-supplement-supplementary_table_3.xlsx]

## Sheet: 192_Supplementary Table3
GSLABEL	ORIGINAL_Ngeni	ES	NES	raw_p	fdr_p
CD8-C1-LEF1	305	0.374023	1.89718	0	0
CD8-C2-CD28	22	0.447943	1.42091	0.067	0.0709412
CD8-C3-CX3CR1	102	0.558907	2.41729	0	0
CD8-C4-GZMK	28	0.659968	2.22765	0.002	0.00257143
CD8-C5-ZNF683	35	0.49308	1.75122	0.007	0.0084
CD8-C6-LAYN	399	0.364679	1.9198	0	0
CD8-C7-SLC4A10	109	0.53814	2.36664	0	0
CD4-C9-CTLA4(TNFRSF9+)	267	-0.22864	-1.13384	0.148	0.148
CD4-C9-CTLA4(TNFRSF9-)	16	0.788814	2.31067	0	0
CD4-C1-CCR7	188	0.394176	1.88655	0	0
CD4-C2-ANXA1	70	0.580907	2.40328	0	0
CD4-C3-GNLY	131	0.584993	2.6493	0	0
CD4-C4-CD69	10	0.629878	1.55225	0.036	0.0405
CD4-C5-EOMES	45	0.572042	2.13804	0.001	0.00138462
CD4-C6-GZMA	98	0.624427	2.68843	0	0
CD4-C7-CXCL13	458	0.306761	1.62221	0	0
Boffa et al.	26	-0.734147	-2.37211	0	0
Yang et al.	24	-0.727846	-2.33114	0	0
